# Supplementary material for: A Population-Based Descriptive Atlas of Invasive Pneumococcal Strains Recovered Within the U.S. During 2015–2016
Source: Front Microbiol. 2018 Nov 19;9:2670. doi: 10.3389/fmicb.2018.02670 (PMC6262371; doi:10.3389/fmicb.2018.02670)
Supplement: sTable 1 — Information associated with isolate identifiers, including patient ages, sequence quality metrics, bioinformatics pipeline features, and year when recovered. [file Table_1.XLSX]

## Sheet: Sheet1
Sample	age	age group	Biosample Accession	Total number of contigs	n50	length of longest contig	Total bases in contigs	WGS_Serotype	Pili	ST	PBP1A	PBP2B	PBP2X	WGS_PEN_SIGN	WGS_PEN	WGS_PEN_SIR_Meningitis	WGS_PEN_SIR_Nonmeningitis	WGS_AMO_SIGN	WGS_AMO	WGS_AMO_SIR	WGS_MER_SIGN	WGS_MER	WGS_MER_SIR	WGS_TAX_SIGN	WGS_TAX	WGS_TAX_SIR_Meningitis	WGS_TAX_SIR_Nonmeningitis	WGS_CFT_SIGN	WGS_CFT	WGS_CFT_SIR_Meningitis	WGS_CFT_SIR_Nonmeningitis	WGS_CFX_SIGN	WGS_CFX	WGS_CFX_SIR	EC	WGS_ERY_SIGN	WGS_ERY	WGS_ERY_SIR	WGS_CLI_SIGN	WGS_CLI	WGS_CLI_SIR	WGS_SYN_SIGN	WGS_SYN	WGS_SYN_SIR	WGS_LZO_SIGN	WGS_LZO	WGS_LZO_SIR	WGS_ERY/CLI	Cot
20151515	88	>65	SAMN05220841	58	97880	327397	2097849	6C	neg	13500	1	4	21	=	0.06	S	S	<=	0.03	S	<=	0.06	S	<=	0.06	S	S	<=	0.5	S	S	<=	0.5	S	neg	=	0.06	S	=	0.06	S	<=	1	S	<=	2	S	neg	neg
20151517	40	19to64	SAMN05220842	62	96785	264184	2028431	3	neg	180	2	3	2	<=	0.03	S	S	<=	0.03	S	<=	0.06	S	<=	0.06	S	S	<=	0.5	S	S	<=	0.5	S	neg	=	0.06	S	=	0.06	S	<=	1	S	<=	2	S	neg	neg
20151518	51	19to64	SAMN05220843	28	172078	524801	2055761	33F	neg	100	2	0	6	<=	0.03	S	S	<=	0.03	S	<=	0.06	S	<=	0.06	S	S	<=	0.5	S	S	<=	0.5	S	neg	=	0.06	S	=	0.06	S	<=	1	S	<=	2	S	neg	FOLP_189-ins
20151520	56	19to64	SAMN05220844	56	81520	254128	2130075	9N	neg	632	1	0	0	<=	0.03	S	S	<=	0.03	S	<=	0.06	S	<=	0.06	S	S	<=	0.5	S	S	<=	0.5	S	neg	=	0.06	S	=	0.06	S	<=	1	S	<=	2	S	neg	neg
20151617	42	19to64	SAMN05220845	65	77053	199561	2063915	10A	neg	816	0	0	2	<=	0.03	S	S	<=	0.03	S	<=	0.06	S	<=	0.06	S	S	<=	0.5	S	S	<=	0.5	S	neg	=	0.06	S	=	0.06	S	<=	1	S	<=	2	S	neg	neg
20151618	37	19to64	SAMN05220846	91	97440	189542	2091952	16F	neg	3157	0	0	3	<=	0.03	S	S	<=	0.03	S	<=	0.06	S	<=	0.06	S	S	<=	0.5	S	S	<=	0.5	S	neg	=	0.06	S	=	0.06	S	<=	1	S	<=	2	S	neg	neg
20151619	56	19to64	SAMN05220847	64	64658	147106	2095335	9N	neg	1257	1	4	2	<=	0.03	S	S	<=	0.03	S	<=	0.06	S	<=	0.06	S	S	<=	0.5	S	S	<=	0.5	S	R23S1-A21G	>	32	R	=	1	R	<=	1	S	<=	2	S	pos	neg
20151620	51	19to64	SAMN05220848	63	61907	151491	2157559	23A	neg	338	19	1	24	=	0.5	R	S	=	0.25	S	<=	0.06	S	=	0.25	S	S	<=	0.5	S	S	<=	0.5	S	ERMB	>	32	R	>	2	R	<=	1	S	<=	2	S	pos	neg
20151621	42	19to64	SAMN05220849	51	77797	172555	2042801	22F	neg	433	1	2	2	<=	0.03	S	S	<=	0.03	S	<=	0.06	S	<=	0.06	S	S	<=	0.5	S	S	<=	0.5	S	neg	=	0.06	S	=	0.06	S	<=	1	S	<=	2	S	neg	neg
20151624	32	19to64	SAMN05220852	66	69531	168190	2096893	9N	neg	1257	1	4	2	<=	0.03	S	S	<=	0.03	S	<=	0.06	S	<=	0.06	S	S	<=	0.5	S	S	<=	0.5	S	neg	=	0.06	S	=	0.06	S	<=	1	S	<=	2	S	neg	neg
20151626	82	>65	SAMN05220853	33	618079	742351	2027999	3	neg	4777	2	3	2	<=	0.03	S	S	<=	0.03	S	<=	0.06	S	<=	0.06	S	S	<=	0.5	S	S	<=	0.5	S	neg	=	0.06	S	=	0.06	S	<=	1	S	<=	2	S	neg	neg
20151631	46	19to64	SAMN05220854	54	77888	261460	2079972	22F	neg	433	1	2	2	<=	0.03	S	S	<=	0.03	S	<=	0.06	S	<=	0.06	S	S	<=	0.5	S	S	<=	0.5	S	neg	=	0.06	S	=	0.06	S	<=	1	S	<=	2	S	neg	neg
20151632	58	19to64	SAMN05220855	142	73523	161231	2042213	3	neg	180	2	0	111	=	0.06	S	S	=	0.06	S	<=	0.06	S	=	0.25	S	S	<=	0.5	S	S	=	1	I	ERMB	>	32	R	>	2	R	<=	1	S	<=	2	S	pos	neg
20151633	79	>65	SAMN05220856	55	78429	218690	2108150	24A/B/F	neg	230	17	15	22	=	0.5	R	S	=	0.12	S	=	0.12	S	=	0.12	S	S	<=	0.5	S	S	<=	0.5	S	ERMB	>	32	R	>	2	R	<=	1	S	<=	2	S	pos	FOLP_180-ins
20151636	1	0-4	SAMN05220858	29	220872	582413	2072893	23B	neg	36	2	0	120	<=	0.03	S	S	<=	0.03	S	<=	0.06	S	<=	0.06	S	S	<=	0.5	S	S	<=	0.5	S	neg	=	0.06	S	=	0.06	S	<=	1	S	<=	2	S	neg	neg
20151637	63	19to64	SAMN05220859	60	67427	192010	2002643	3	neg	180	2	3	2	<=	0.03	S	S	<=	0.03	S	<=	0.06	S	<=	0.06	S	S	<=	0.5	S	S	<=	0.5	S	neg	=	0.06	S	=	0.06	S	<=	1	S	<=	2	S	neg	neg
20151638	54	19to64	SAMN05220860	55	98505	439523	2100283	15A	1	3811	1	0	0	<=	0.03	S	S	<=	0.03	S	<=	0.06	S	<=	0.06	S	S	<=	0.5	S	S	<=	0.5	S	neg	=	0.06	S	=	0.06	S	<=	1	S	<=	2	S	neg	neg
20151639	59	19to64	SAMN05220861	38	95471	305556	2063059	23A	neg	338	0	1	1	=	0.25	R	S	=	0.06	S	<=	0.06	S	=	0.12	S	S	<=	0.5	S	S	<=	0.5	S	neg	=	0.06	S	=	0.06	S	<=	1	S	<=	2	S	neg	neg
20151640	37	19to64	SAMN05220862	23	195035	444107	2054405	33F	neg	100	2	0	6	<=	0.03	S	S	<=	0.03	S	<=	0.06	S	<=	0.06	S	S	<=	0.5	S	S	<=	0.5	S	MEF	=	8	R	=	0.06	S	<=	1	S	<=	2	S	neg	FOLP_189-ins
20151641	66	>65	SAMN05220863	53	130600	307029	2073844	6C	neg	1292	19	31	8	=	1	R	S	=	1	S	=	0.12	S	=	0.25	S	S	<=	0.5	S	S	=	2	R	MEF	=	8	R	=	0.06	S	<=	1	S	<=	2	S	neg	FOLA-Q1H,I20L:FOLP_173-ins
20151642	12	5to18	SAMN05220864	34	157870	287920	2102514	23B	neg	1373	0	1	1	=	0.25	R	S	=	0.06	S	<=	0.06	S	=	0.12	S	S	<=	0.5	S	S	<=	0.5	S	neg	=	0.06	S	=	0.06	S	<=	1	S	<=	2	S	neg	FOLP_180-ins
20151885	33	19to64	SAMN05220865	41	116985	409753	2157541	19A	neg	319	10	9	13	=	0.5	R	S	=	0.5	S	=	0.25	S	=	0.25	S	S	<=	0.5	S	S	<=	0.5	S	ERMB:ERMBUP	>	32	R	>	2	R	<=	1	S	<=	2	S	pos	FOLA-V3I,I20L:FOLP_180-ins
20151886	74	>65	SAMN05220866	54	100797	178286	2093358	17F	neg	392	11	0	0	<=	0.03	S	S	<=	0.03	S	<=	0.06	S	<=	0.06	S	S	<=	0.5	S	S	<=	0.5	S	MEF	=	8	R	=	0.06	S	<=	1	S	<=	2	S	neg	neg
20151887	57	19to64	SAMN05220867	46	95250	323232	2094808	9N	neg	1257	1	4	2	<=	0.03	S	S	<=	0.03	S	<=	0.06	S	<=	0.06	S	S	<=	0.5	S	S	<=	0.5	S	neg	=	0.06	S	=	0.06	S	<=	1	S	<=	2	S	neg	neg
20151888	80	>65	SAMN05220868	40	144115	514241	2115202	35F	neg	446	0	0	3	<=	0.03	S	S	<=	0.03	S	<=	0.06	S	<=	0.06	S	S	<=	0.5	S	S	<=	0.5	S	neg	=	0.06	S	=	0.06	S	<=	1	S	<=	2	S	neg	neg
20151890	61	19to64	SAMN05220870	73	131561	280522	2063473	16F	neg	995	9	4	3	<=	0.03	S	S	<=	0.03	S	<=	0.06	S	<=	0.06	S	S	<=	0.5	S	S	<=	0.5	S	neg	=	0.06	S	=	0.06	S	<=	1	S	<=	2	S	neg	neg
20151891	47	19to64	SAMN05220871	37	106996	257107	1986615	12F	neg	220	0	0	2	<=	0.03	S	S	<=	0.03	S	<=	0.06	S	<=	0.06	S	S	<=	0.5	S	S	<=	0.5	S	neg	=	0.06	S	=	0.06	S	<=	1	S	<=	2	S	neg	neg
20151892	64	19to64	SAMN05220872	28	217169	320612	1983706	3	neg	180	2	0	2	<=	0.03	S	S	<=	0.03	S	<=	0.06	S	<=	0.06	S	S	<=	0.5	S	S	<=	0.5	S	neg	=	0.06	S	=	0.06	S	<=	1	S	<=	2	S	neg	neg
20151893	74	>65	SAMN05220873	55	105929	219437	2018591	35B	1	558	4	7	7	=	2	R	S	=	4	I	=	0.5	I	=	1	I	S	=	1	I	S	>	2	R	MEF	=	8	R	=	0.06	S	<=	1	S	<=	2	S	neg	neg
20151896	83	>65	SAMN05220876	35	131770	356141	2060611	23A	neg	338	0	1	48	=	0.25	R	S	=	0.25	S	<=	0.06	S	=	0.12	S	S	<=	0.5	S	S	<=	0.5	S	neg	=	0.06	S	=	0.06	S	<=	1	S	<=	2	S	neg	FOLP_177-ins
20151897	70	>65	SAMN05220877	74	73719	296339	2139984	15A	1	3811	1	0	0	<=	0.03	S	S	<=	0.03	S	<=	0.06	S	<=	0.06	S	S	<=	0.5	S	S	<=	0.5	S	neg	=	0.06	S	=	0.06	S	<=	1	S	<=	2	S	neg	neg
20151900	62	19to64	SAMN05220880	63	116420	180748	2087295	15B	neg	199	2	0	0	<=	0.03	S	S	<=	0.03	S	<=	0.06	S	<=	0.06	S	S	<=	0.5	S	S	<=	0.5	S	MEF	=	8	R	=	0.06	S	<=	1	S	<=	2	S	neg	neg
20151901	31	19to64	SAMN05220881	66	106065	268642	2129384	7C	neg	10443	2	4	6	<=	0.03	S	S	<=	0.03	S	<=	0.06	S	<=	0.06	S	S	<=	0.5	S	S	<=	0.5	S	neg	=	0.06	S	=	0.06	S	<=	1	S	<=	2	S	neg	neg
20152129	52	19to64	SAMN05220882	48	95922	368713	2098153	15A	1	3811	1	0	0	<=	0.03	S	S	<=	0.03	S	<=	0.06	S	<=	0.06	S	S	<=	0.5	S	S	<=	0.5	S	neg	=	0.06	S	=	0.06	S	<=	1	S	<=	2	S	neg	neg
20152130	51	19to64	SAMN05220883	30	146752	268651	2020768	35B:35D	1	558	4	7	7	=	2	R	S	=	4	I	=	0.5	I	=	1	I	S	=	1	I	S	>	2	R	MEF	=	8	R	=	0.06	S	<=	1	S	<=	2	S	neg	neg
20152131	74	>65	SAMN05220884	63	61342	238796	2101100	35B	1	156	4	12	7	=	2	R	S	=	4	I	=	0.5	I	=	1	I	S	=	1	I	S	>	2	R	MEF	=	8	R	=	0.06	S	<=	1	S	<=	2	S	neg	FOLA-I20L:FOLP_178-ins
20152132	74	>65	SAMN05220885	48	98104	528868	2099945	15A	1	3811	1	0	0	<=	0.03	S	S	<=	0.03	S	<=	0.06	S	<=	0.06	S	S	<=	0.5	S	S	<=	0.5	S	neg	=	0.06	S	=	0.06	S	<=	1	S	<=	2	S	neg	neg
20152133	ND	ND	SAMN05220886	58	109095	180951	2090947	15B	neg	199	2	0	0	<=	0.03	S	S	<=	0.03	S	<=	0.06	S	<=	0.06	S	S	<=	0.5	S	S	<=	0.5	S	MEF	=	8	R	=	0.06	S	<=	1	S	<=	2	S	neg	neg
20152134	76	>65	SAMN05220887	288	51672	162025	2037706	11A	2	62	2	6	0	<=	0.03	S	S	<=	0.03	S	<=	0.06	S	<=	0.06	S	S	<=	0.5	S	S	<=	0.5	S	neg	=	0.06	S	=	0.06	S	<=	1	S	<=	2	S	neg	neg
20152151	39	19to64	SAMN05220888	36	130597	450145	2072207	10A	neg	97	0	0	2	<=	0.03	S	S	<=	0.03	S	<=	0.06	S	<=	0.06	S	S	<=	0.5	S	S	<=	0.5	S	neg	=	0.06	S	=	0.06	S	<=	1	S	<=	2	S	neg	neg
20152152	45	19to64	SAMN05220889	22	168663	767590	2000653	8	neg	1480	3	5	5	<=	0.03	S	S	<=	0.03	S	<=	0.06	S	<=	0.06	S	S	<=	0.5	S	S	<=	0.5	S	neg	=	0.06	S	=	0.06	S	<=	1	S	<=	2	S	neg	neg
20152153	82	>65	SAMN05220890	82	79171	142302	2128669	15A	neg	63	4	74	7	=	2	R	S	=	2	S	=	0.5	I	=	1	I	S	=	1	I	S	>	2	R	ERMB	>	32	R	>	2	R	<=	1	S	<=	2	S	pos	FOLP_178-ins
20152154	73	>65	SAMN05220891	52	123893	316994	2081267	22F	neg	433	1	2	59	<=	0.03	S	S	<=	0.03	S	<=	0.06	S	<=	0.06	S	S	<=	0.5	S	S	<=	0.5	S	MEF	=	8	R	=	0.06	S	<=	1	S	<=	2	S	neg	neg
20152156	51	19to64	SAMN05220892	63	122718	388869	2112997	15B	neg	199	2	0	2	<=	0.03	S	S	<=	0.03	S	<=	0.06	S	<=	0.06	S	S	<=	0.5	S	S	<=	0.5	S	neg	=	0.06	S	=	0.06	S	<=	1	S	<=	2	S	neg	neg
20152158	76	>65	SAMN05220894	42	111893	317069	2059511	22F	neg	7314	1	2	2	<=	0.03	S	S	<=	0.03	S	<=	0.06	S	<=	0.06	S	S	<=	0.5	S	S	<=	0.5	S	MEF	=	8	R	=	0.06	S	<=	1	S	<=	2	S	neg	neg
20152159	46	19to64	SAMN05220895	69	85571	232139	2124728	15A	neg	63	24	27	28	=	0.25	R	S	<=	0.03	S	<=	0.06	S	=	0.12	S	S	<=	0.5	S	S	<=	0.5	S	ERMB	>	32	R	>	2	R	<=	1	S	<=	2	S	pos	neg
20152190	67	>65	SAMN05220897	64	81555	240829	2015757	31	neg	3548	12	0	123	=	0.12	R	S	=	0.06	S	<=	0.06	S	=	0.12	S	S	<=	0.5	S	S	<=	0.5	S	neg	=	0.06	S	=	0.06	S	<=	1	S	<=	2	S	neg	neg
20152191	43	19to64	SAMN05220898	55	208282	383175	2123679	6C	neg	1292	19	31	8	=	1	R	S	=	1	S	=	0.12	S	=	0.25	S	S	<=	0.5	S	S	=	2	R	MEF	=	8	R	=	0.06	S	<=	1	S	<=	2	S	neg	FOLA-Q1H,I20L:FOLP_173-ins
20152192	47	19to64	SAMN05220899	60	66064	172358	2025378	31	neg	568	12	0	0	<=	0.03	S	S	<=	0.03	S	<=	0.06	S	<=	0.06	S	S	<=	0.5	S	S	<=	0.5	S	neg	=	0.06	S	=	0.06	S	<=	1	S	<=	2	S	neg	neg
20152193	87	>65	SAMN05220900	84	82672	213563	2138538	38	neg	393	2	4	0	<=	0.03	S	S	<=	0.03	S	<=	0.06	S	<=	0.06	S	S	<=	0.5	S	S	<=	0.5	S	neg	=	0.06	S	=	0.06	S	<=	1	S	<=	2	S	neg	neg
20152204	1	0-4	SAMN05220902	150	25871	112860	2066270	19A	1:2	320	13	14	26	=	8	R	R	=	8	R	=	1	R	=	8	R	R	=	4	R	R	>	2	R	ERMB:MEF	>	32	R	>	2	R	<=	1	S	<=	2	S	pos	FOLA-Q1Y,Q11H,E14D,I20L:FOLP_195-ins
20152206	61	19to64	SAMN05220903	72	59958	219023	2097086	15A	1	3811	1	NF	0	<=	0.03	S	S	<=	0.03	S	<=	0.06	S	<=	0.06	S	S	<=	0.03	S	S	<=	0.5	S	neg	=	0.06	S	=	0.06	S	<=	1	S	<=	2	S	neg	neg
20152208	86	>65	SAMN05220904	29	142558	445735	1981209	3	neg	180	2	0	2	<=	0.03	S	S	<=	0.03	S	<=	0.06	S	<=	0.06	S	S	<=	0.5	S	S	<=	0.5	S	neg	=	0.06	S	=	0.06	S	<=	1	S	<=	2	S	neg	neg
20152209	74	>65	SAMN05220905	100	41357	156983	2125613	19F	2	654	2	0	0	<=	0.03	S	S	<=	0.03	S	<=	0.06	S	<=	0.06	S	S	<=	0.5	S	S	<=	0.5	S	neg	=	0.06	S	=	0.06	S	<=	1	S	<=	2	S	neg	FOLA-D12N
20152210	52	19to64	SAMN05220906	86	47770	112361	2082806	10A	neg	816	0	0	2	<=	0.03	S	S	<=	0.03	S	<=	0.06	S	<=	0.06	S	S	<=	0.5	S	S	<=	0.5	S	neg	=	0.06	S	=	0.06	S	<=	1	S	<=	2	S	neg	neg
20152214	46	19to64	SAMN05220907	53	121229	378636	2066552	19A	1:2	320	13	11	16	=	4	R	I	=	8	R	=	1	R	=	2	R	I	=	2	R	I	>	2	R	ERMB:MEF	>	32	R	>	2	R	<=	1	S	<=	2	S	pos	FOLA-Q1Y,Q11H,E14D,I20L:FOLP_195-ins
20152216	52	19to64	SAMN05220908	57	69648	212042	2052557	19A	1:2	320	13	14	26	=	8	R	R	=	8	R	=	1	R	=	8	R	R	=	4	R	R	>	2	R	ERMB:MEF	>	32	R	>	2	R	<=	1	S	<=	2	S	pos	FOLA-Q1Y,Q11H,E14D,I20L:FOLP_195-ins
20152217	46	19to64	SAMN05220909	37	92396	266765	1984585	3	neg	180	2	0	2	<=	0.03	S	S	<=	0.03	S	<=	0.06	S	<=	0.06	S	S	<=	0.5	S	S	<=	0.5	S	neg	=	0.06	S	=	0.06	S	<=	1	S	<=	2	S	neg	neg
20152218	87	>65	SAMN05220910	76	69632	207569	2136865	7C	1	7260	2	4	6	<=	0.03	S	S	<=	0.03	S	<=	0.06	S	<=	0.06	S	S	<=	0.5	S	S	<=	0.5	S	neg	=	0.06	S	=	0.06	S	<=	1	S	<=	2	S	neg	neg
20152219	67	>65	SAMN05220911	77	113633	307785	2073538	19A	1:2	1451	13	11	16	=	4	R	I	=	8	R	=	1	R	=	2	R	I	=	2	R	I	>	2	R	ERMB:MEF	>	32	R	>	2	R	<=	1	S	<=	2	S	pos	FOLA-Q1Y,Q11H,E14D,I20L:FOLP_195-ins
20152220	39	19to64	SAMN05220912	67	96971	319705	2122163	9N	neg	66	1	0	0	<=	0.03	S	S	<=	0.03	S	<=	0.06	S	<=	0.06	S	S	<=	0.5	S	S	<=	0.5	S	neg	=	0.06	S	=	0.06	S	<=	1	S	<=	2	S	neg	neg
20152222	6	5to18	SAMN05220913	66	72029	178455	2124299	22F	neg	433	1	2	2	<=	0.03	S	S	<=	0.03	S	<=	0.06	S	<=	0.06	S	S	<=	0.5	S	S	<=	0.5	S	neg	=	0.06	S	=	0.06	S	<=	1	S	<=	2	S	neg	neg
20152223	83	>65	SAMN05220914	30	184556	438016	2001564	3	neg	180	2	3	2	<=	0.03	S	S	<=	0.03	S	<=	0.06	S	<=	0.06	S	S	<=	0.5	S	S	<=	0.5	S	neg	=	0.06	S	=	0.06	S	<=	1	S	<=	2	S	neg	neg
20152224	37	19to64	SAMN05220915	46	100115	220575	2092874	9N	neg	10447	1	0	0	<=	0.03	S	S	<=	0.03	S	<=	0.06	S	<=	0.06	S	S	<=	0.5	S	S	<=	0.5	S	neg	=	0.06	S	=	0.06	S	<=	1	S	<=	2	S	neg	neg
20152240	74	>65	SAMN05220917	25	617836	757198	1994352	3	neg	180	2	3	2	<=	0.03	S	S	<=	0.03	S	<=	0.06	S	<=	0.06	S	S	<=	0.5	S	S	<=	0.5	S	neg	=	0.06	S	=	0.06	S	<=	1	S	<=	2	S	neg	neg
20152241	81	>65	SAMN05220918	52	96296	273143	2129128	15A	neg	63	67	27	35	=	0.5	R	S	=	0.25	S	=	0.12	S	=	0.25	S	S	<=	0.5	S	S	<=	0.5	S	ERMB	>	32	R	>	2	R	<=	1	S	<=	2	S	pos	FOLP_178-ins
20152242	85	>65	SAMN05220919	43	116276	256237	2046649	31	neg	1111	12	0	0	<=	0.03	S	S	<=	0.03	S	<=	0.06	S	<=	0.06	S	S	<=	0.5	S	S	<=	0.5	S	MEF	=	8	R	=	0.06	S	<=	1	S	<=	2	S	neg	neg
20152243	63	19to64	SAMN05220920	73	74658	191516	2087333	16F	neg	8476	0	0	3	<=	0.03	S	S	<=	0.03	S	<=	0.06	S	<=	0.06	S	S	<=	0.5	S	S	<=	0.5	S	neg	=	0.06	S	=	0.06	S	<=	1	S	<=	2	S	neg	neg
20152244	1	0-4	SAMN05220921	35	138255	537750	2072483	10A	neg	11248	0	0	2	<=	0.03	S	S	<=	0.03	S	<=	0.06	S	<=	0.06	S	S	<=	0.5	S	S	<=	0.5	S	neg	=	0.06	S	=	0.06	S	<=	1	S	<=	2	S	neg	neg
20152245	93	>65	SAMN05220922	67	83251	176674	2162205	19A	1	695	8	0	11	=	0.12	R	S	=	0.06	S	<=	0.06	S	<=	0.06	S	S	<=	0.5	S	S	<=	0.5	S	MEF	=	8	R	=	0.06	S	<=	1	S	<=	2	S	neg	neg
20152247	80	>65	SAMN05220924	37	120362	313608	2024616	35B	1	558	4	7	7	=	2	R	S	=	4	I	=	0.5	I	=	1	I	S	=	1	I	S	>	2	R	MEF	=	8	R	=	0.06	S	<=	1	S	<=	2	S	neg	neg
20152248	44	19to64	SAMN05220925	59	112972	239485	2097264	17F	neg	392	11	0	0	<=	0.03	S	S	<=	0.03	S	<=	0.06	S	<=	0.06	S	S	<=	0.5	S	S	<=	0.5	S	MEF	=	8	R	=	0.06	S	<=	1	S	<=	2	S	neg	neg
20152250	47	19to64	SAMN05220927	50	153580	528733	2096232	15A	1	3811	1	0	0	<=	0.03	S	S	<=	0.03	S	<=	0.06	S	<=	0.06	S	S	<=	0.5	S	S	<=	0.5	S	neg	=	0.06	S	=	0.06	S	<=	1	S	<=	2	S	neg	neg
20152251	81	>65	SAMN05220928	36	143710	306266	2072702	23A	neg	338	0	1	1	=	0.25	R	S	=	0.06	S	<=	0.06	S	=	0.12	S	S	<=	0.5	S	S	<=	0.5	S	neg	=	0.06	S	=	0.06	S	<=	1	S	<=	2	S	neg	FOLA-I20L
20152252	44	19to64	SAMN05220929	133	39211	157820	2110440	11A	neg	62	2	6	10	<=	0.03	S	S	<=	0.03	S	<=	0.06	S	<=	0.06	S	S	<=	0.5	S	S	<=	0.5	S	neg	=	0.06	S	=	0.06	S	<=	1	S	<=	2	S	neg	neg
20152253	67	>65	SAMN05220930	57	94566	220479	2082797	15A	neg	63	24	27	11	=	0.12	R	S	=	0.12	S	<=	0.06	S	<=	0.06	S	S	<=	0.5	S	S	<=	0.5	S	ERMB	>	32	R	>	2	R	<=	1	S	<=	2	S	pos	FOLP_178-ins
20152254	55	19to64	SAMN05220931	74	62409	166428	2107039	31	neg	568	12	0	0	<=	0.03	S	S	<=	0.03	S	<=	0.06	S	<=	0.06	S	S	<=	0.5	S	S	<=	0.5	S	neg	=	0.06	S	=	0.06	S	<=	1	S	<=	2	S	neg	neg
20152257	3	0-4	SAMN05220934	74	77158	167142	2075569	19A	neg	199	0	29	11	=	0.12	R	S	=	0.12	S	<=	0.06	S	<=	0.06	S	S	<=	0.5	S	S	<=	0.5	S	neg	=	0.06	S	=	0.06	S	<=	1	S	<=	2	S	neg	neg
20152258	42	19to64	SAMN05220935	33	185691	512337	1996679	3	neg	180	2	3	2	<=	0.03	S	S	<=	0.03	S	<=	0.06	S	<=	0.06	S	S	<=	0.5	S	S	<=	0.5	S	neg	=	0.06	S	=	0.06	S	<=	1	S	<=	2	S	neg	neg
20152259	53	19to64	SAMN05220936	64	62821	278219	2113261	23A	neg	338	0	1	1	=	0.25	R	S	=	0.06	S	<=	0.06	S	=	0.12	S	S	<=	0.5	S	S	<=	0.5	S	neg	=	0.06	S	=	0.06	S	<=	1	S	<=	2	S	neg	FOLA-I20L
20152260	90	>65	SAMN05220937	87	42688	179527	2125447	22F	neg	433	1	2	2	<=	0.03	S	S	<=	0.03	S	<=	0.06	S	<=	0.06	S	S	<=	0.5	S	S	<=	0.5	S	neg	=	0.06	S	=	0.06	S	<=	1	S	<=	2	S	neg	neg
20152261	84	>65	SAMN05220938	57	74709	183111	2121035	6C	neg	473	1	4	21	=	0.06	S	S	<=	0.03	S	<=	0.06	S	<=	0.06	S	S	<=	0.5	S	S	<=	0.5	S	neg	=	0.06	S	=	0.06	S	<=	1	S	<=	2	S	neg	neg
20152262	78	>65	SAMN05220939	43	97190	264760	2055826	3	neg	180	2	0	111	=	0.06	S	S	=	0.06	S	<=	0.06	S	=	0.25	S	S	<=	0.5	S	S	=	1	I	ERMB	>	32	R	>	2	R	<=	1	S	<=	2	S	pos	neg
20152263	96	>65	SAMN05220940	62	71341	131225	2113109	35F	neg	1635	0	0	3	<=	0.03	S	S	<=	0.03	S	<=	0.06	S	<=	0.06	S	S	<=	0.5	S	S	<=	0.5	S	neg	=	0.06	S	=	0.06	S	<=	1	S	<=	2	S	neg	neg
20152264	65	>65	SAMN05220941	58	67648	253618	2015023	12F	neg	11249	0	0	2	<=	0.03	S	S	<=	0.03	S	<=	0.06	S	<=	0.06	S	S	<=	0.5	S	S	<=	0.5	S	neg	=	0.06	S	=	0.06	S	<=	1	S	<=	2	S	neg	neg
20152265	54	19to64	SAMN05220942	31	144311	325627	1999203	8	neg	1268	3	5	5	<=	0.03	S	S	<=	0.03	S	<=	0.06	S	<=	0.06	S	S	<=	0.5	S	S	<=	0.5	S	neg	=	0.06	S	=	0.06	S	<=	1	S	<=	2	S	neg	neg
20152266	24	19to64	SAMN05220943	71	84569	194162	2169441	19A	1	695	8	0	11	=	0.12	R	S	=	0.06	S	<=	0.06	S	<=	0.06	S	S	<=	0.5	S	S	<=	0.5	S	MEF	=	8	R	=	0.06	S	<=	1	S	<=	2	S	neg	neg
20152268	1	0-4	SAMN05220945	27	331088	426410	1994832	3	neg	180	2	3	2	<=	0.03	S	S	<=	0.03	S	<=	0.06	S	<=	0.06	S	S	<=	0.5	S	S	<=	0.5	S	neg	=	0.06	S	=	0.06	S	<=	1	S	<=	2	S	neg	neg
20152269	54	19to64	SAMN05220946	30	469509	742325	2028611	3	neg	180	2	3	2	<=	0.03	S	S	<=	0.03	S	<=	0.06	S	<=	0.06	S	S	<=	0.5	S	S	<=	0.5	S	neg	=	0.06	S	=	0.06	S	<=	1	S	<=	2	S	neg	neg
20152271	52	19to64	SAMN05220948	75	66789	180113	2016296	7F	2	191	2	0	2	<=	0.03	S	S	<=	0.03	S	<=	0.06	S	<=	0.06	S	S	<=	0.5	S	S	<=	0.5	S	MEF	=	8	R	=	0.06	S	<=	1	S	<=	2	S	neg	neg
20152272	24	19to64	SAMN05220949	44	86185	169973	2015105	11A	2	62	2	6	0	<=	0.03	S	S	<=	0.03	S	<=	0.06	S	<=	0.06	S	S	<=	0.5	S	S	<=	0.5	S	neg	=	0.06	S	=	0.06	S	<=	1	S	<=	2	S	neg	neg
20152273	84	>65	SAMN05220950	69	86184	268560	2159724	34	neg	547	0	0	2	<=	0.03	S	S	<=	0.03	S	<=	0.06	S	<=	0.06	S	S	<=	0.5	S	S	<=	0.5	S	neg	=	0.06	S	=	0.06	S	<=	1	S	<=	2	S	neg	neg
20152276	45	19to64	SAMN05220953	47	86081	440929	2112009	23A	neg	338	0	1	1	=	0.25	R	S	=	0.06	S	<=	0.06	S	=	0.12	S	S	<=	0.5	S	S	<=	0.5	S	neg	=	0.06	S	=	0.06	S	<=	1	S	<=	2	S	neg	neg
20152277	80	>65	SAMN05220954	49	101661	306905	2071091	23A	neg	338	0	1	1	=	0.25	R	S	=	0.06	S	<=	0.06	S	=	0.12	S	S	<=	0.5	S	S	<=	0.5	S	neg	=	0.06	S	=	0.06	S	<=	1	S	<=	2	S	neg	neg
20152278	82	>65	SAMN05220955	39	197855	338732	2071738	23A	neg	438	2	0	6	<=	0.03	S	S	<=	0.03	S	<=	0.06	S	<=	0.06	S	S	<=	0.5	S	S	<=	0.5	S	neg	=	0.06	S	=	0.06	S	<=	1	S	<=	2	S	neg	neg
20152422	77	>65	SAMN05220956	32	183233	575846	2017880	3	neg	180	2	3	2	<=	0.03	S	S	<=	0.03	S	<=	0.06	S	<=	0.06	S	S	<=	0.5	S	S	<=	0.5	S	neg	=	0.06	S	=	0.06	S	<=	1	S	<=	2	S	neg	neg
20152423	82	>65	SAMN05220957	87	44012	233340	2068855	22F	neg	10163	1	2	2	<=	0.03	S	S	<=	0.03	S	<=	0.06	S	<=	0.06	S	S	<=	0.5	S	S	<=	0.5	S	MEF	=	8	R	=	0.06	S	<=	1	S	<=	2	S	neg	neg
20152424	70	>65	SAMN05220958	29	144300	270737	1998455	8	neg	1480	3	5	5	<=	0.03	S	S	<=	0.03	S	<=	0.06	S	<=	0.06	S	S	<=	0.5	S	S	<=	0.5	S	neg	=	0.06	S	=	0.06	S	<=	1	S	<=	2	S	neg	neg
20152425	81	>65	SAMN05220959	72	64528	182960	2011005	7F	2	191	2	0	2	<=	0.03	S	S	<=	0.03	S	<=	0.06	S	<=	0.06	S	S	<=	0.5	S	S	<=	0.5	S	neg	=	0.06	S	=	0.06	S	<=	1	S	<=	2	S	neg	neg
20152426	69	>65	SAMN05220960	27	302925	420434	1993309	3	neg	180	2	3	2	<=	0.03	S	S	<=	0.03	S	<=	0.06	S	<=	0.06	S	S	<=	0.5	S	S	<=	0.5	S	neg	=	0.06	S	=	0.06	S	<=	1	S	<=	2	S	neg	neg
20152427	2	0-4	SAMN05220961	68	87712	255245	2093820	16F	neg	659	9	0	3	<=	0.03	S	S	<=	0.03	S	<=	0.06	S	<=	0.06	S	S	<=	0.5	S	S	<=	0.5	S	neg	=	0.06	S	=	0.06	S	<=	1	S	<=	2	S	neg	neg
20152428	83	>65	SAMN05220962	33	178714	259931	2025729	33F	neg	9029	2	0	6	<=	0.03	S	S	<=	0.03	S	<=	0.06	S	<=	0.06	S	S	<=	0.5	S	S	<=	0.5	S	MEF	=	8	R	=	0.06	S	<=	1	S	<=	2	S	neg	FOLP_189-ins
20152429	82	>65	SAMN05220963	87	56411	272881	2177845	38	neg	393	2	4	0	<=	0.03	S	S	<=	0.03	S	<=	0.06	S	<=	0.06	S	S	<=	0.5	S	S	<=	0.5	S	neg	=	0.06	S	=	0.06	S	<=	1	S	<=	2	S	neg	neg
20152430	39	19to64	SAMN05220964	57	69267	261599	2083708	22F	neg	433	1	2	2	<=	0.03	S	S	<=	0.03	S	<=	0.06	S	<=	0.06	S	S	<=	0.5	S	S	<=	0.5	S	neg	=	0.06	S	=	0.06	S	<=	1	S	<=	2	S	neg	neg
20152431	59	19to64	SAMN05220965	31	139095	372149	2042255	3	neg	10457	2	0	6	<=	0.03	S	S	<=	0.03	S	<=	0.06	S	<=	0.06	S	S	<=	0.5	S	S	<=	0.5	S	neg	=	0.06	S	=	0.06	S	<=	1	S	<=	2	S	neg	FOLP_189-ins
20152432	59	19to64	SAMN05220966	41	101599	188307	2000691	8	neg	1268	3	5	5	<=	0.03	S	S	<=	0.03	S	<=	0.06	S	<=	0.06	S	S	<=	0.5	S	S	<=	0.5	S	neg	=	0.06	S	=	0.06	S	<=	1	S	<=	2	S	neg	neg
20152433	85	>65	SAMN05220967	37	167517	323751	2030378	3	neg	180	2	3	2	<=	0.03	S	S	<=	0.03	S	<=	0.06	S	<=	0.06	S	S	<=	0.5	S	S	<=	0.5	S	neg	=	0.06	S	=	0.06	S	<=	1	S	<=	2	S	neg	neg
20152434	36	19to64	SAMN05220968	24	185383	667316	2002184	8	neg	1480	3	5	5	<=	0.03	S	S	<=	0.03	S	<=	0.06	S	<=	0.06	S	S	<=	0.5	S	S	<=	0.5	S	neg	=	0.06	S	=	0.06	S	<=	1	S	<=	2	S	neg	neg
20152435	82	>65	SAMN05220969	38	92009	199372	2003033	8	neg	1480	3	5	5	<=	0.03	S	S	<=	0.03	S	<=	0.06	S	<=	0.06	S	S	<=	0.5	S	S	<=	0.5	S	neg	=	0.06	S	=	0.06	S	<=	1	S	<=	2	S	neg	neg
20152627	56	19to64	SAMN05220970	50	92107	261260	2078509	22F	neg	433	1	2	2	<=	0.03	S	S	<=	0.03	S	<=	0.06	S	<=	0.06	S	S	<=	0.5	S	S	<=	0.5	S	neg	=	0.06	S	=	0.06	S	<=	1	S	<=	2	S	neg	neg
20152628	42	19to64	SAMN05220971	51	79575	270297	2078464	6C	neg	1379	19	31	8	=	1	R	S	=	1	S	=	0.12	S	=	0.25	S	S	<=	0.5	S	S	=	2	R	MEF	=	8	R	=	0.06	S	<=	1	S	<=	2	S	neg	FOLA-Q1H,I20L:FOLP_173-ins
20152629	72	>65	SAMN05220972	31	112216	284996	2054762	33F	neg	100	2	0	6	<=	0.03	S	S	<=	0.03	S	<=	0.06	S	<=	0.06	S	S	<=	0.5	S	S	<=	0.5	S	neg	=	0.06	S	=	0.06	S	<=	1	S	<=	2	S	neg	FOLP_189-ins
20152630	76	>65	SAMN05220973	53	76879	297214	2065082	16F	neg	659	9	0	3	<=	0.03	S	S	<=	0.03	S	<=	0.06	S	<=	0.06	S	S	<=	0.5	S	S	<=	0.5	S	neg	=	0.06	S	=	0.06	S	<=	1	S	<=	2	S	neg	neg
20152632	68	>65	SAMN05220975	51	100938	354404	2093729	9N	neg	1257	1	4	2	<=	0.03	S	S	<=	0.03	S	<=	0.06	S	<=	0.06	S	S	<=	0.5	S	S	<=	0.5	S	neg	=	0.06	S	=	0.06	S	<=	1	S	<=	2	S	neg	neg
20152633	2	0-4	SAMN05220976	52	100537	225687	2062767	22F	neg	7314	1	2	2	<=	0.03	S	S	<=	0.03	S	<=	0.06	S	<=	0.06	S	S	<=	0.5	S	S	<=	0.5	S	MEF	=	8	R	=	0.06	S	<=	1	S	<=	2	S	neg	neg
20152635	67	>65	SAMN05220978	45	105615	158315	2022574	35B	1	558	4	7	7	=	2	R	S	=	4	I	=	0.5	I	=	1	I	S	=	1	I	S	>	2	R	MEF	=	8	R	=	0.06	S	<=	1	S	<=	2	S	neg	neg
20152638	19	19to64	SAMN05220979	86	52566	147917	2174628	6C	1	1092	6	7	8	=	0.5	R	S	=	1	S	=	0.25	S	=	0.5	S	S	<=	0.5	S	S	=	2	R	MEF	=	8	R	=	0.06	S	<=	1	S	<=	2	S	neg	FOLA-Q1H,V3I,E14D,I20L:FOLP_195-ins
20152639	0	0-4	SAMN05220980	65	61832	154375	2067680	19A	1:2	320	13	11	16	=	4	R	I	=	8	R	=	1	R	=	2	R	I	=	2	R	I	>	2	R	ERMB:MEF	>	32	R	>	2	R	<=	1	S	<=	2	S	pos	FOLA-Q1Y,Q11H,E14D,I20L:FOLP_195-ins
20152641	50	19to64	SAMN05220981	50	91399	261607	2078553	22F	neg	433	1	2	2	<=	0.03	S	S	<=	0.03	S	<=	0.06	S	<=	0.06	S	S	<=	0.5	S	S	<=	0.5	S	neg	=	0.06	S	=	0.06	S	<=	1	S	<=	2	S	neg	neg
20152643	53	19to64	SAMN05220982	136	61756	166067	2090353	9N	neg	1257	1	4	2	<=	0.03	S	S	<=	0.03	S	<=	0.06	S	<=	0.06	S	S	<=	0.5	S	S	<=	0.5	S	neg	=	0.06	S	=	0.06	S	<=	1	S	<=	2	S	neg	neg
20152644	66	>65	SAMN05220983	40	119568	186498	1986340	12F	neg	220	0	0	2	<=	0.03	S	S	<=	0.03	S	<=	0.06	S	<=	0.06	S	S	<=	0.5	S	S	<=	0.5	S	neg	=	0.06	S	=	0.06	S	<=	1	S	<=	2	S	neg	neg
20152645	29	19to64	SAMN05220984	49	90179	232753	2043806	22F	neg	433	1	2	2	<=	0.03	S	S	<=	0.03	S	<=	0.06	S	<=	0.06	S	S	<=	0.5	S	S	<=	0.5	S	neg	=	0.06	S	=	0.06	S	<=	1	S	<=	2	S	neg	neg
20152646	33	19to64	SAMN05220985	21	330074	385980	2074208	8	neg	53	3	6	5	<=	0.03	S	S	<=	0.03	S	<=	0.06	S	<=	0.06	S	S	<=	0.5	S	S	<=	0.5	S	neg	=	0.06	S	=	0.06	S	<=	1	S	<=	2	S	neg	neg
20152647	1	0-4	SAMN05220986	42	104549	418049	2115932	15B	1	7479	7	8	9	=	0.25	R	S	=	0.5	S	=	0.12	S	=	0.12	S	S	<=	0.5	S	S	<=	0.5	S	MEF	=	8	R	=	0.06	S	<=	1	S	<=	2	S	neg	FOLP_177-ins
20152649	52	19to64	SAMN05220988	55	87245	267773	2053721	35B	1	558	4	7	7	=	2	R	S	=	4	I	=	0.5	I	=	1	I	S	=	1	I	S	>	2	R	MEF	=	8	R	=	0.06	S	<=	1	S	<=	2	S	neg	neg
20152650	55	19to64	SAMN05220989	106	47541	280932	2075402	19A	1:2	320	13	11	16	=	4	R	I	=	8	R	=	1	R	=	2	R	I	=	2	R	I	>	2	R	ERMB:MEF	>	32	R	>	2	R	<=	1	S	<=	2	S	pos	FOLA-Q1Y,Q11H,E14D,I20L:FOLP_195-ins
20152651	91	>65	SAMN05220990	46	103741	220955	2050124	35B:35D	1	558	4	7	7	=	2	R	S	=	4	I	=	0.5	I	=	1	I	S	=	1	I	S	>	2	R	MEF	=	8	R	=	0.06	S	<=	1	S	<=	2	S	neg	neg
20152652	1	0-4	SAMN05220991	70	66332	152334	2066222	35B	1	11250	4	14	7	=	2	R	S	=	8	R	=	1	R	=	1	I	S	=	1	I	S	>	2	R	neg	=	0.06	S	=	0.06	S	<=	1	S	<=	2	S	neg	FOLP_169-ins
20152653	64	19to64	SAMN05220992	53	89622	249905	2078404	15A	neg	63	24	27	11	=	0.12	R	S	=	0.12	S	<=	0.06	S	<=	0.06	S	S	<=	0.5	S	S	<=	0.5	S	ERMB	>	32	R	>	2	R	<=	1	S	<=	2	S	pos	FOLP_180-ins
20152654	75	>65	SAMN05220993	51	98848	232316	2062582	22F	neg	7314	1	2	2	<=	0.03	S	S	<=	0.03	S	<=	0.06	S	<=	0.06	S	S	<=	0.5	S	S	<=	0.5	S	MEF	=	8	R	=	0.06	S	<=	1	S	<=	2	S	neg	neg
20152655	66	>65	SAMN05220994	81	64781	192730	2210261	6B	1	11251	34	76	7	=	4	R	I	=	8	R	=	1	R	=	1	I	S	=	1	I	S	>	2	R	ERMB:ERMBUP	>	32	R	>	2	R	<=	1	S	<=	2	S	pos	FOLA-Q1H,I20L:FOLP_180-ins
20152656	63	19to64	SAMN05220995	31	124953	486593	2083066	23A	neg	10458	19	1	24	=	0.5	R	S	=	0.25	S	<=	0.06	S	=	0.25	S	S	<=	0.5	S	S	<=	0.5	S	ERMB	>	32	R	>	2	R	<=	1	S	<=	2	S	pos	neg
20152658	65	>65	SAMN05220996	23	430532	617791	1982435	3	neg	180	2	3	2	<=	0.03	S	S	<=	0.03	S	<=	0.06	S	<=	0.06	S	S	<=	0.5	S	S	<=	0.5	S	neg	=	0.06	S	=	0.06	S	<=	1	S	<=	2	S	neg	neg
20152662	20	19to64	SAMN05220997	54	90175	218916	2072335	15B	neg	199	2	0	2	<=	0.03	S	S	<=	0.03	S	<=	0.06	S	<=	0.06	S	S	<=	0.5	S	S	<=	0.5	S	neg	=	0.06	S	=	0.06	S	<=	1	S	<=	2	S	neg	neg
20152663	0	0-4	SAMN05220998	40	201726	369193	2132141	16F	neg	10459	0	10	2	<=	0.03	S	S	<=	0.03	S	<=	0.06	S	<=	0.06	S	S	<=	0.5	S	S	<=	0.5	S	MEF	=	8	R	=	0.06	S	<=	1	S	<=	2	S	neg	neg
20152664	79	>65	SAMN05220999	27	193506	297570	1983921	3	neg	180	2	0	2	<=	0.03	S	S	<=	0.03	S	<=	0.06	S	<=	0.06	S	S	<=	0.5	S	S	<=	0.5	S	neg	=	0.06	S	=	0.06	S	<=	1	S	<=	2	S	neg	neg
20152665	75	>65	SAMN05221000	44	140423	251817	2147030	23B	neg	1373	0	1	1	=	0.25	R	S	=	0.06	S	<=	0.06	S	=	0.12	S	S	<=	0.5	S	S	<=	0.5	S	neg	=	0.06	S	=	0.06	S	<=	1	S	<=	2	S	neg	FOLP_180-ins
20152666	67	>65	SAMN05221001	49	125053	425837	2107296	23A	neg	338	0	1	1	=	0.25	R	S	=	0.06	S	<=	0.06	S	=	0.12	S	S	<=	0.5	S	S	<=	0.5	S	neg	=	0.06	S	=	0.06	S	<=	1	S	<=	2	S	neg	neg
20152668	62	19to64	SAMN05221002	1630	9168	67169	3040415	3	neg	180	2	0	2	<=	0.03	S	S	<=	0.03	S	<=	0.06	S	<=	0.06	S	S	<=	0.5	S	S	<=	0.5	S	neg	=	0.06	S	=	0.06	S	<=	1	S	<=	2	S	neg	neg
20152669	47	19to64	SAMN05221003	2161	3015	34516	3483824	3	neg	180	2	0	2	<=	0.03	S	S	<=	0.03	S	<=	0.06	S	<=	0.06	S	S	<=	0.5	S	S	<=	0.5	S	neg	=	0.06	S	=	0.06	S	<=	1	S	<=	2	S	neg	neg
20152670	77	>65	SAMN05221004	55	127187	483774	2004221	8	neg	1480	3	5	5	<=	0.03	S	S	<=	0.03	S	<=	0.06	S	<=	0.06	S	S	<=	0.5	S	S	<=	0.5	S	neg	=	0.06	S	=	0.06	S	<=	1	S	<=	2	S	neg	neg
20152671	92	>65	SAMN09214279	542	41685	96371	2269089	7F	2	191	2	0	2	<=	0.03	S	S	<=	0.03	S	<=	0.06	S	<=	0.06	S	S	<=	0.5	S	S	<=	0.5	S	inconclusive	=	0.06	S	=	0.06	S	<=	1	S	<=	2	S	neg	inconclusive
20152673	67	>65	SAMN05221006	1370	13237	190653	2867143	3	neg	180	2	0	2	<=	0.03	S	S	<=	0.03	S	<=	0.06	S	<=	0.06	S	S	<=	0.5	S	S	<=	0.5	S	ERMB:ERMBS:ERMBUP	=	0.06	S	=	0.06	S	<=	1	S	<=	2	S	neg	neg
20152675	12	5to18	SAMN05221007	24	220546	477035	2071193	33F	neg	2705	2	0	6	<=	0.03	S	S	<=	0.03	S	<=	0.06	S	<=	0.06	S	S	<=	0.5	S	S	<=	0.5	S	MEF	=	8	R	=	0.06	S	<=	1	S	<=	2	S	neg	FOLP_189-ins
20152676	55	19to64	SAMN05221008	32	128488	265840	1985702	12F	neg	220	0	0	2	<=	0.03	S	S	<=	0.03	S	<=	0.06	S	<=	0.06	S	S	<=	0.5	S	S	<=	0.5	S	neg	=	0.06	S	=	0.06	S	<=	1	S	<=	2	S	neg	neg
20152677	36	19to64	SAMN05221009	3276	1703	25822	3889757	19F	2	11602	2	0	0	<=	0.03	S	S	<=	0.03	S	<=	0.06	S	<=	0.06	S	S	<=	0.5	S	S	<=	0.5	S	neg	=	0.06	S	=	0.06	S	<=	1	S	<=	2	S	neg	neg
20152678	38	19to64	SAMN05221010	59	126905	403506	2121524	16F	neg	1840	68	10	11	=	0.06	S	S	=	0.06	S	<=	0.06	S	<=	0.06	S	S	<=	0.5	S	S	<=	0.5	S	neg	=	0.06	S	=	0.06	S	<=	1	S	<=	2	S	neg	neg
20152679	57	19to64	SAMN05221011	792	36250	128217	2413707	4	neg	10172	1	0	0	<=	0.03	S	S	<=	0.03	S	<=	0.06	S	<=	0.06	S	S	<=	0.5	S	S	<=	0.5	S	neg	=	0.06	S	=	0.06	S	<=	1	S	<=	2	S	neg	FOLP_179-ins
20152680	30	19to64	SAMN05221012	105	55773	210698	2002903	8	neg	1480	3	5	5	<=	0.03	S	S	<=	0.03	S	<=	0.06	S	<=	0.06	S	S	<=	0.5	S	S	<=	0.5	S	neg	=	0.06	S	=	0.06	S	<=	1	S	<=	2	S	neg	neg
20152681	72	>65	SAMN05221013	589	35419	122575	2327882	9N	neg	4666	23	0	0	<=	0.03	S	S	<=	0.03	S	<=	0.06	S	<=	0.06	S	S	<=	0.5	S	S	<=	0.5	S	neg	=	0.06	S	=	0.06	S	<=	1	S	<=	2	S	neg	neg
20152682	33	19to64	SAMN05221014	36	121945	476056	2095555	9N	neg	66	1	0	0	<=	0.03	S	S	<=	0.03	S	<=	0.06	S	<=	0.06	S	S	<=	0.5	S	S	<=	0.5	S	neg	=	0.06	S	=	0.06	S	<=	1	S	<=	2	S	neg	neg
20152683	43	19to64	SAMN05221015	31	185304	674115	2042832	8	neg	1480	3	5	5	<=	0.03	S	S	<=	0.03	S	<=	0.06	S	<=	0.06	S	S	<=	0.5	S	S	<=	0.5	S	neg	=	0.06	S	=	0.06	S	<=	1	S	<=	2	S	neg	neg
20152685	57	19to64	SAMN05221016	65	71290	325328	2103855	20	neg	1257	1	4	2	<=	0.03	S	S	<=	0.03	S	<=	0.06	S	<=	0.06	S	S	<=	0.5	S	S	<=	0.5	S	neg	=	0.06	S	=	0.06	S	<=	1	S	<=	2	S	neg	neg
20152687	63	19to64	SAMN05221017	1241	17513	74898	2675158	8	neg	63	24	27	28	=	0.25	R	S	<=	0.03	S	<=	0.06	S	=	0.12	S	S	<=	0.5	S	S	<=	0.5	S	ERMB	>	32	R	>	2	R	<=	1	S	<=	2	S	pos	neg
20152691	62	19to64	SAMN05221018	2569	2157	34176	3653271	17F	neg	123	11	0	0	<=	0.03	S	S	<=	0.03	S	<=	0.06	S	<=	0.06	S	S	<=	0.5	S	S	<=	0.5	S	MEF	=	8	R	=	0.06	S	<=	1	S	<=	2	S	neg	FOLP_189-ins
20152692	0	0-4	SAMN05221019	598	32705	127040	2266592	22F	neg	7314	1	2	2	<=	0.03	S	S	<=	0.03	S	<=	0.06	S	<=	0.06	S	S	<=	0.5	S	S	<=	0.5	S	MEF	=	8	R	=	0.06	S	<=	1	S	<=	2	S	neg	neg
20152694	70	>65	SAMN05221020	2160	3322	34899	3423924	35B	1	558	2	7	NF	=	2	R	S	=	2	S	=	0.5	I	=	1	I	S	=	1	I	S	>	2	R	neg	=	0.06	S	=	0.06	S	<=	1	S	<=	2	S	neg	FOLP_195-ins
20152695	58	19to64	SAMN05221021	64	270657	667316	1998383	8	neg	1480	3	2	5	<=	0.03	S	S	<=	0.03	S	<=	0.06	S	<=	0.06	S	S	<=	0.5	S	S	<=	0.5	S	neg	=	0.06	S	=	0.06	S	<=	1	S	<=	2	S	neg	neg
20152697	89	>65	SAMN05221022	30	191859	691717	2018579	3	neg	180	2	3	2	<=	0.03	S	S	<=	0.03	S	<=	0.06	S	<=	0.06	S	S	<=	0.5	S	S	<=	0.5	S	neg	=	0.06	S	=	0.06	S	<=	1	S	<=	2	S	neg	neg
20152698	82	>65	SAMN05221023	24	219508	531078	2063071	33F	neg	100	2	0	9	=	0.06	S	S	=	0.06	S	<=	0.06	S	<=	0.06	S	S	<=	0.5	S	S	<=	0.5	S	MEF	=	8	R	=	0.06	S	<=	1	S	<=	2	S	neg	FOLP_189-ins
20152699	78	>65	SAMN05221024	43	155027	311068	2002256	8	neg	1480	3	5	5	<=	0.03	S	S	<=	0.03	S	<=	0.06	S	<=	0.06	S	S	<=	0.5	S	S	<=	0.5	S	neg	=	0.06	S	=	0.06	S	<=	1	S	<=	2	S	neg	neg
20152700	63	19to64	SAMN05221025	30	193458	297566	1984777	3	neg	180	2	0	2	<=	0.03	S	S	<=	0.03	S	<=	0.06	S	<=	0.06	S	S	<=	0.5	S	S	<=	0.5	S	neg	=	0.06	S	=	0.06	S	<=	1	S	<=	2	S	neg	neg
20152701	71	>65	SAMN05221026	4239	1150	25184	3994167	11A	neg	62	NF	6	NF	<=	0.03	S	S	<=	0.03	S	<=	0.06	S	<=	0.06	S	S	<=	0.03	S	S	<=	0.5	S	neg	=	0.06	S	=	0.06	S	<=	1	S	<=	2	S	neg	FOLP_182-ins
20152702	64	19to64	SAMN05221027	1088	14243	69283	2768351	10A	neg	1263	2	4	0	<=	0.03	S	S	<=	0.03	S	<=	0.06	S	<=	0.06	S	S	<=	0.5	S	S	<=	0.5	S	neg	=	0.06	S	=	0.06	S	<=	1	S	<=	2	S	neg	neg
20152703	4	0-4	SAMN09214261	432	74320	188019	2227930	3	neg	180	2	0	2	<=	0.03	S	S	<=	0.03	S	<=	0.06	S	<=	0.06	S	S	<=	0.5	S	S	<=	0.5	S	inconclusive	=	0.06	S	=	0.06	S	<=	1	S	<=	2	S	neg	inconclusive
20152704	75	>65	SAMN05221028	33	289311	392505	1984170	3	neg	180	2	0	2	<=	0.03	S	S	<=	0.03	S	<=	0.06	S	<=	0.06	S	S	<=	0.5	S	S	<=	0.5	S	neg	=	0.06	S	=	0.06	S	<=	1	S	<=	2	S	neg	neg
20152705	60	19to64	SAMN05221029	63	129777	325615	2069613	20	neg	1257	1	4	2	<=	0.03	S	S	<=	0.03	S	<=	0.06	S	<=	0.06	S	S	<=	0.5	S	S	<=	0.5	S	neg	=	0.06	S	=	0.06	S	<=	1	S	<=	2	S	neg	neg
20152706	55	19to64	SAMN05221030	31	323566	618070	2030839	3	neg	180	2	3	2	<=	0.03	S	S	<=	0.03	S	<=	0.06	S	<=	0.06	S	S	<=	0.5	S	S	<=	0.5	S	neg	=	0.06	S	=	0.06	S	<=	1	S	<=	2	S	neg	neg
20152707	0	0-4	SAMN05221031	2569	4354	38634	3004975	16F	neg	1840	0	10	2	<=	0.03	S	S	<=	0.03	S	<=	0.06	S	<=	0.06	S	S	<=	0.5	S	S	<=	0.5	S	neg	=	0.06	S	=	0.06	S	<=	1	S	<=	2	S	neg	neg
20152708	ND	ND	SAMN05221032	2058	4763	34523	2945326	3	neg	180	2	0	2	<=	0.03	S	S	<=	0.03	S	<=	0.06	S	<=	0.06	S	S	<=	0.5	S	S	<=	0.5	S	neg	=	0.06	S	=	0.06	S	<=	1	S	<=	2	S	neg	neg
20152709	86	>65	SAMN05221033	2021	4994	75323	2980651	3	neg	180	0	10	2	<=	0.03	S	S	<=	0.03	S	<=	0.06	S	<=	0.06	S	S	<=	0.5	S	S	<=	0.5	S	neg	=	0.06	S	=	0.06	S	<=	1	S	<=	2	S	neg	neg
20152710	50	19to64	SAMN05221034	69	86239	262996	2087426	10A	neg	816	0	0	2	<=	0.03	S	S	<=	0.03	S	<=	0.06	S	<=	0.06	S	S	<=	0.5	S	S	<=	0.5	S	MEF	=	8	R	=	0.06	S	<=	1	S	<=	2	S	neg	neg
20152711	33	19to64	SAMN05221035	1966	3080	30823	3560930	20	neg	1257	1	4	2	<=	0.03	S	S	<=	0.03	S	<=	0.06	S	<=	0.06	S	S	<=	0.5	S	S	<=	0.5	S	neg	=	0.06	S	=	0.06	S	<=	1	S	<=	2	S	neg	neg
20152712	72	>65	SAMN05221036	56	120290	294813	2024211	35B	1	558	4	7	7	=	2	R	S	=	4	I	=	0.5	I	=	1	I	S	=	1	I	S	>	2	R	neg	=	0.06	S	=	0.06	S	<=	1	S	<=	2	S	neg	neg
20152713	30	19to64	SAMN05221037	61	146722	216547	2018720	8	neg	1480	3	5	5	<=	0.03	S	S	<=	0.03	S	<=	0.06	S	<=	0.06	S	S	<=	0.5	S	S	<=	0.5	S	neg	=	0.06	S	=	0.06	S	<=	1	S	<=	2	S	neg	neg
20152714	76	>65	SAMN05221038	2122	3740	35776	3303153	3	neg	180	2	3	2	<=	0.03	S	S	<=	0.03	S	<=	0.06	S	<=	0.06	S	S	<=	0.5	S	S	<=	0.5	S	neg	=	0.06	S	=	0.06	S	<=	1	S	<=	2	S	neg	neg
20152715	24	19to64	SAMN05221039	51	120071	325461	2061128	20	neg	1257	1	4	2	<=	0.03	S	S	<=	0.03	S	<=	0.06	S	<=	0.06	S	S	<=	0.5	S	S	<=	0.5	S	neg	=	0.06	S	=	0.06	S	<=	1	S	<=	2	S	neg	neg
20152716	72	>65	SAMN05221040	1069	17613	99457	2728221	23B	neg	1448	12	0	0	<=	0.03	S	S	<=	0.03	S	<=	0.06	S	<=	0.06	S	S	<=	0.5	S	S	<=	0.5	S	neg	=	0.06	S	=	0.06	S	<=	1	S	<=	2	S	neg	neg
20152717	0	0-4	SAMN05221041	1201	11219	55868	2740519	12F	neg	220	0	0	NF	<=	0.03	S	S	<=	0.03	S	<=	0.06	S	<=	0.06	S	S	<=	0.5	S	S	<=	0.5	S	neg	=	0.06	S	=	0.06	S	<=	1	S	<=	2	S	neg	neg
20152718	35	19to64	SAMN05221042	38	146353	198039	1988790	12F	neg	220	0	0	2	<=	0.03	S	S	<=	0.03	S	<=	0.06	S	<=	0.06	S	S	<=	0.5	S	S	<=	0.5	S	neg	=	0.06	S	=	0.06	S	<=	1	S	<=	2	S	neg	neg
20152719	54	19to64	SAMN05221043	40	109122	207038	1983301	12F	neg	220	0	0	2	<=	0.03	S	S	<=	0.03	S	<=	0.06	S	<=	0.06	S	S	<=	0.5	S	S	<=	0.5	S	neg	=	0.06	S	=	0.06	S	<=	1	S	<=	2	S	neg	neg
20152720	60	19to64	SAMN05221044	40	110820	339808	1991792	12F	neg	220	0	0	2	<=	0.03	S	S	<=	0.03	S	<=	0.06	S	<=	0.06	S	S	<=	0.5	S	S	<=	0.5	S	neg	=	0.06	S	=	0.06	S	<=	1	S	<=	2	S	neg	neg
20152721	47	19to64	SAMN05221045	34	111856	265428	1985688	12F	neg	220	0	0	2	<=	0.03	S	S	<=	0.03	S	<=	0.06	S	<=	0.06	S	S	<=	0.5	S	S	<=	0.5	S	neg	=	0.06	S	=	0.06	S	<=	1	S	<=	2	S	neg	neg
20152722	81	>65	SAMN05221046	317	11138	54814	2145497	22F	neg	433	1	NF	2	<=	0.03	S	S	<=	0.03	S	<=	0.06	S	<=	0.06	S	S	<=	0.03	S	S	<=	0.5	S	neg	=	0.06	S	=	0.06	S	<=	1	S	<=	2	S	neg	neg
20152723	91	>65	SAMN05221047	168	24377	196212	2113380	23A	neg	338	0	1	1	=	0.25	R	S	=	0.06	S	<=	0.06	S	=	0.12	S	S	<=	0.5	S	S	<=	0.5	S	neg	=	0.06	S	=	0.06	S	<=	1	S	<=	2	S	neg	neg
20152724	55	19to64	SAMN05221048	188	18979	107110	2007148	12F	neg	220	0	0	2	<=	0.03	S	S	<=	0.03	S	<=	0.06	S	<=	0.06	S	S	<=	0.5	S	S	<=	0.5	S	neg	=	0.06	S	=	0.06	S	<=	1	S	<=	2	S	neg	neg
20152725	43	19to64	SAMN05221049	238	16616	57164	2038290	15A	neg	3058	0	4	2	<=	0.03	S	S	<=	0.03	S	<=	0.06	S	<=	0.06	S	S	<=	0.5	S	S	<=	0.5	S	neg	=	0.06	S	=	0.06	S	<=	1	S	<=	2	S	neg	neg
20152726	19	19to64	SAMN05221050	23	180516	444099	2061556	33F	neg	100	2	0	6	<=	0.03	S	S	<=	0.03	S	<=	0.06	S	<=	0.06	S	S	<=	0.5	S	S	<=	0.5	S	MEF	=	8	R	=	0.06	S	<=	1	S	<=	2	S	neg	FOLP_189-ins
20152727	34	19to64	SAMN05221051	450	7961	46920	2119322	19A	1:2	320	13	11	26	=	4	R	I	=	8	R	=	1	R	=	4	R	R	=	4	R	R	>	2	R	ERMB:MEF	>	32	R	>	2	R	<=	1	S	<=	2	S	pos	FOLA-Q1Y,Q11H,E14D,I20L:FOLP_195-ins
20152803	83	>65	SAMN05221052	93	48551	108310	1989769	12F	neg	220	0	0	17	<=	0.03	S	S	<=	0.03	S	<=	0.06	S	<=	0.06	S	S	<=	0.5	S	S	<=	0.5	S	neg	=	0.06	S	=	0.06	S	<=	1	S	<=	2	S	neg	neg
20152804	102	>65	SAMN05221053	336	11174	39627	2174996	6C	neg	8446	0	0	124	<=	0.03	S	S	<=	0.03	S	<=	0.06	S	<=	0.06	S	S	<=	0.5	S	S	<=	0.5	S	ERMB	>	32	R	>	2	R	<=	1	S	<=	2	S	pos	neg
20152805	66	>65	SAMN05221054	133	29393	101225	2022401	35B	1	558	4	7	7	=	2	R	S	=	4	I	=	0.5	I	=	1	I	S	=	1	I	S	>	2	R	MEF	=	8	R	=	0.06	S	<=	1	S	<=	2	S	neg	neg
20152806	81	>65	SAMN05221055	177	23306	110515	2077573	23A	neg	42	2	0	6	<=	0.03	S	S	<=	0.03	S	<=	0.06	S	<=	0.06	S	S	<=	0.5	S	S	<=	0.5	S	neg	=	0.06	S	=	0.06	S	<=	1	S	<=	2	S	neg	neg
20152807	59	19to64	SAMN05221056	334	11849	70351	2153975	7C	neg	1797	2	4	6	<=	0.03	S	S	<=	0.03	S	<=	0.06	S	<=	0.06	S	S	<=	0.5	S	S	<=	0.5	S	neg	=	0.06	S	=	0.06	S	<=	1	S	<=	2	S	neg	neg
20152808	59	19to64	SAMN05221057	205	19493	86144	2104595	16F	neg	414	0	6	2	<=	0.03	S	S	<=	0.03	S	<=	0.06	S	<=	0.06	S	S	<=	0.5	S	S	<=	0.5	S	neg	=	0.06	S	=	0.06	S	<=	1	S	<=	2	S	neg	neg
20152809	36	19to64	SAMN05221058	14	440721	785191	1982903	3	neg	180	2	3	2	<=	0.03	S	S	<=	0.03	S	<=	0.06	S	<=	0.06	S	S	<=	0.5	S	S	<=	0.5	S	neg	=	0.06	S	=	0.06	S	<=	1	S	<=	2	S	neg	neg
20152810	59	19to64	SAMN05221059	304	13207	64713	2135187	19A	neg	667	0	0	0	<=	0.03	S	S	<=	0.03	S	<=	0.06	S	<=	0.06	S	S	<=	0.5	S	S	<=	0.5	S	neg	=	0.06	S	=	0.06	S	<=	1	S	<=	2	S	neg	neg
20152811	9	5to18	SAMN05221060	51	78192	203618	2080443	22F	neg	433	1	2	2	<=	0.03	S	S	<=	0.03	S	<=	0.06	S	<=	0.06	S	S	<=	0.5	S	S	<=	0.5	S	neg	=	0.06	S	=	0.06	S	<=	1	S	<=	2	S	neg	neg
20152812	48	19to64	SAMN05221061	59	80941	212156	2113540	10A	neg	816	0	0	2	<=	0.03	S	S	<=	0.03	S	<=	0.06	S	<=	0.06	S	S	<=	0.5	S	S	<=	0.5	S	neg	=	0.06	S	=	0.06	S	<=	1	S	<=	2	S	neg	neg
20152813	57	19to64	SAMN05221062	227	18437	79663	2085562	22F	neg	433	1	2	2	<=	0.03	S	S	<=	0.03	S	<=	0.06	S	<=	0.06	S	S	<=	0.5	S	S	<=	0.5	S	neg	=	0.06	S	=	0.06	S	<=	1	S	<=	2	S	neg	neg
20152814	84	>65	SAMN05221063	144	29956	101052	2071352	16F	neg	659	9	0	3	<=	0.03	S	S	<=	0.03	S	<=	0.06	S	<=	0.06	S	S	<=	0.5	S	S	<=	0.5	S	neg	=	0.06	S	=	0.06	S	<=	1	S	<=	2	S	neg	neg
20152815	53	19to64	SAMN05221064	55	71361	185470	2033445	11A	neg	62	2	6	10	<=	0.03	S	S	<=	0.03	S	<=	0.06	S	<=	0.06	S	S	<=	0.5	S	S	<=	0.5	S	neg	=	0.06	S	=	0.06	S	<=	1	S	<=	2	S	neg	neg
20152816	47	19to64	SAMN05221065	48	87144	287024	2061066	9N	neg	66	1	0	0	<=	0.03	S	S	<=	0.03	S	<=	0.06	S	<=	0.06	S	S	<=	0.5	S	S	<=	0.5	S	neg	=	0.06	S	=	0.06	S	<=	1	S	<=	2	S	neg	neg
20152817	93	>65	SAMN05221066	50	93614	207549	1988344	12F	neg	220	0	0	2	<=	0.03	S	S	<=	0.03	S	<=	0.06	S	<=	0.06	S	S	<=	0.5	S	S	<=	0.5	S	neg	=	0.06	S	=	0.06	S	<=	1	S	<=	2	S	neg	neg
20152818	57	19to64	SAMN05221067	74	59836	182915	2118189	19F	2	654	2	0	0	<=	0.03	S	S	<=	0.03	S	<=	0.06	S	<=	0.06	S	S	<=	0.5	S	S	<=	0.5	S	neg	=	0.06	S	=	0.06	S	<=	1	S	<=	2	S	neg	neg
20152819	58	19to64	SAMN05221068	54	79725	171901	2107451	19A	1	156	8	12	36	=	0.5	R	S	=	1	S	=	0.12	S	=	0.25	S	S	<=	0.5	S	S	=	2	R	MEF	=	8	R	=	0.06	S	<=	1	S	<=	2	S	neg	FOLA-I20L:FOLP_178-ins
20152820	46	19to64	SAMN05221069	55	91528	171768	2066440	16F	neg	659	9	0	3	<=	0.03	S	S	<=	0.03	S	<=	0.06	S	<=	0.06	S	S	<=	0.5	S	S	<=	0.5	S	neg	=	0.06	S	=	0.06	S	<=	1	S	<=	2	S	neg	neg
20152821	45	19to64	SAMN05221070	38	159185	536821	2057057	16F	neg	659	9	0	3	<=	0.03	S	S	<=	0.03	S	<=	0.06	S	<=	0.06	S	S	<=	0.5	S	S	<=	0.5	S	neg	=	0.06	S	=	0.06	S	<=	1	S	<=	2	S	neg	neg
20152822	63	19to64	SAMN05221071	51	97859	257547	2032991	11A	neg	62	2	6	10	<=	0.03	S	S	<=	0.03	S	<=	0.06	S	<=	0.06	S	S	<=	0.5	S	S	<=	0.5	S	neg	=	0.06	S	=	0.06	S	<=	1	S	<=	2	S	neg	neg
20152823	67	>65	SAMN05221072	44	126220	194550	2025890	12F	neg	220	0	0	17	<=	0.03	S	S	<=	0.03	S	<=	0.06	S	<=	0.06	S	S	<=	0.5	S	S	<=	0.5	S	neg	=	0.06	S	=	0.06	S	<=	1	S	<=	2	S	neg	neg
20152824	61	19to64	SAMN05221073	30	192814	315818	1983782	3	neg	180	2	0	2	<=	0.03	S	S	<=	0.03	S	<=	0.06	S	<=	0.06	S	S	<=	0.5	S	S	<=	0.5	S	neg	=	0.06	S	=	0.06	S	<=	1	S	<=	2	S	neg	neg
20152825	64	19to64	SAMN05221074	39	95085	186958	1985258	12F	neg	220	0	0	2	<=	0.03	S	S	<=	0.03	S	<=	0.06	S	<=	0.06	S	S	<=	0.5	S	S	<=	0.5	S	neg	=	0.06	S	=	0.06	S	<=	1	S	<=	2	S	neg	neg
20152826	64	19to64	SAMN05221075	37	102945	305049	1988146	33F	neg	1012	2	0	2	<=	0.03	S	S	<=	0.03	S	<=	0.06	S	<=	0.06	S	S	<=	0.5	S	S	<=	0.5	S	neg	=	0.06	S	=	0.06	S	<=	1	S	<=	2	S	neg	neg
20152828	53	19to64	SAMN05221076	69	76726	254212	2103322	7C	neg	10460	2	4	3	<=	0.03	S	S	<=	0.03	S	<=	0.06	S	<=	0.06	S	S	<=	0.5	S	S	<=	0.5	S	neg	=	0.06	S	=	0.06	S	<=	1	S	<=	2	S	neg	neg
20152829	61	19to64	SAMN05221077	55	131102	307231	2054097	23A	neg	338	0	1	1	=	0.25	R	S	=	0.06	S	<=	0.06	S	=	0.12	S	S	<=	0.5	S	S	<=	0.5	S	neg	=	0.06	S	=	0.06	S	<=	1	S	<=	2	S	neg	neg
20152830	81	>65	SAMN05221078	51	219511	512753	2136472	23B	neg	439	0	0	0	<=	0.03	S	S	<=	0.03	S	<=	0.06	S	<=	0.06	S	S	<=	0.5	S	S	<=	0.5	S	MEF	=	8	R	=	0.06	S	<=	1	S	<=	2	S	neg	neg
20152831	50	19to64	SAMN05221079	56	89555	142779	2082275	15A	neg	63	24	27	11	=	0.12	R	S	=	0.12	S	<=	0.06	S	<=	0.06	S	S	<=	0.5	S	S	<=	0.5	S	ERMB	>	32	R	>	2	R	<=	1	S	<=	2	S	pos	FOLP_178-ins
20152877	1	0-4	SAMN05221081	58	75817	253461	2141883	35B	1	156	4	12	7	=	2	R	S	=	4	I	=	0.5	I	=	1	I	S	=	1	I	S	>	2	R	MEF	=	8	R	=	0.06	S	<=	1	S	<=	2	S	neg	FOLA-I20L:FOLP_178-ins
20152878	86	>65	SAMN05221082	28	192848	313688	2049200	3	neg	180	2	0	2	<=	0.03	S	S	<=	0.03	S	<=	0.06	S	<=	0.06	S	S	<=	0.5	S	S	<=	0.5	S	ERMB:ERMBS:ERMBUP	=	0.06	S	=	0.06	S	<=	1	S	<=	2	S	neg	neg
20152879	74	>65	SAMN05221083	29	216450	312180	2051149	3	neg	180	2	0	2	<=	0.03	S	S	<=	0.03	S	<=	0.06	S	<=	0.06	S	S	<=	0.5	S	S	<=	0.5	S	ERMB:ERMBS:ERMBUP	=	0.06	S	=	0.06	S	<=	1	S	<=	2	S	neg	neg
20152880	66	>65	SAMN05221084	34	232954	475108	2106977	15B	1	3280	7	8	9	=	0.25	R	S	=	0.5	S	=	0.12	S	=	0.12	S	S	<=	0.5	S	S	<=	0.5	S	MEF	=	8	R	=	0.06	S	<=	1	S	<=	2	S	neg	FOLP_177-ins:FOLP_180-ins
20152881	62	19to64	SAMN05221085	32	173364	319642	2148369	23B	neg	1373	0	1	1	=	0.25	R	S	=	0.06	S	<=	0.06	S	=	0.12	S	S	<=	0.5	S	S	<=	0.5	S	MEF	=	8	R	=	0.06	S	<=	1	S	<=	2	S	neg	FOLP_180-ins
20152882	57	19to64	SAMN05221086	42	188626	450696	2085161	7C	neg	4510	12	0	3	<=	0.03	S	S	<=	0.03	S	<=	0.06	S	<=	0.06	S	S	<=	0.5	S	S	<=	0.5	S	neg	=	0.06	S	=	0.06	S	<=	1	S	<=	2	S	neg	neg
20152884	59	19to64	SAMN05221087	56	79958	492187	2141310	35B	1	9910	4	12	7	=	2	R	S	=	4	I	=	0.5	I	=	1	I	S	=	1	I	S	>	2	R	MEF	=	8	R	=	0.06	S	<=	1	S	<=	2	S	neg	FOLA-I20L:FOLP_178-ins
20152885	58	19to64	SAMN05221088	48	93805	212126	2086126	3	neg	180	2	0	128	<=	0.03	S	S	<=	0.03	S	<=	0.06	S	<=	0.06	S	S	<=	0.5	S	S	<=	0.5	S	neg	=	0.06	S	=	0.06	S	<=	1	S	<=	2	S	neg	neg
20152887	70	>65	SAMN05221090	109	59275	298329	2060679	22F	neg	7314	1	2	2	<=	0.03	S	S	<=	0.03	S	<=	0.06	S	<=	0.06	S	S	<=	0.5	S	S	<=	0.5	S	MEF	=	8	R	=	0.06	S	<=	1	S	<=	2	S	neg	neg
20152888	60	19to64	SAMN05221091	738	19262	70447	2010107	19A	2	320	13	11	127	=	2	R	S	=	2	S	=	1	R	=	0.5	S	S	<=	0.5	S	S	=	2	R	ERMB:MEF	>	32	R	>	2	R	<=	1	S	<=	2	S	pos	FOLA-Q1Y,Q11H,E14D,I20L:FOLP_195-ins
20152889	59	19to64	SAMN05221092	133	55338	136011	2026488	19A	2	320	13	11	16	=	4	R	I	=	8	R	=	1	R	=	2	R	I	=	2	R	I	>	2	R	ERMB:MEF	>	32	R	>	2	R	<=	1	S	<=	2	S	pos	FOLA-Q1Y,Q11H,E14D,I20L:FOLP_195-ins
20152890	44	19to64	SAMN05221093	92	53137	106367	2015668	7F	2	191	2	0	2	<=	0.03	S	S	<=	0.03	S	<=	0.06	S	<=	0.06	S	S	<=	0.5	S	S	<=	0.5	S	neg	=	0.06	S	=	0.06	S	<=	1	S	<=	2	S	neg	neg
20152891	68	>65	SAMN05221094	77	55468	136930	2071987	11A	2	62	2	6	0	<=	0.03	S	S	<=	0.03	S	<=	0.06	S	<=	0.06	S	S	<=	0.5	S	S	<=	0.5	S	MEF	=	8	R	=	0.06	S	<=	1	S	<=	2	S	neg	neg
20152892	51	19to64	SAMN05221095	63	84381	186975	2113375	16F	neg	1840	0	10	2	<=	0.03	S	S	<=	0.03	S	<=	0.06	S	<=	0.06	S	S	<=	0.5	S	S	<=	0.5	S	neg	=	0.06	S	=	0.06	S	<=	1	S	<=	2	S	neg	neg
20152893	66	>65	SAMN05221096	275	13470	62845	2153189	23A	neg	338	0	1	1	=	0.25	R	S	=	0.06	S	<=	0.06	S	=	0.12	S	S	<=	0.5	S	S	<=	0.5	S	MEF	=	8	R	=	0.06	S	<=	1	S	<=	2	S	neg	neg
20152894	54	19to64	SAMN05221097	169	25615	64388	2145781	7C	neg	11252	2	4	6	<=	0.03	S	S	<=	0.03	S	<=	0.06	S	<=	0.06	S	S	<=	0.5	S	S	<=	0.5	S	neg	=	0.06	S	=	0.06	S	<=	1	S	<=	2	S	neg	neg
20152895	59	19to64	SAMN05221098	74	53009	109160	2070452	10A	neg	816	0	0	2	<=	0.03	S	S	<=	0.03	S	<=	0.06	S	<=	0.06	S	S	<=	0.5	S	S	<=	0.5	S	neg	=	0.06	S	=	0.06	S	<=	1	S	<=	2	S	neg	neg
20152896	68	>65	SAMN05221099	40	105969	253710	2049390	35B	neg	558	4	7	7	=	2	R	S	=	4	I	=	0.5	I	=	1	I	S	=	1	I	S	>	2	R	MEF	=	8	R	=	0.06	S	<=	1	S	<=	2	S	neg	neg
20152897	74	>65	SAMN05221100	38	157997	351314	2072163	6C	neg	10461	19	31	8	=	1	R	S	=	1	S	=	0.12	S	=	0.25	S	S	<=	0.5	S	S	=	2	R	MEF	=	8	R	=	0.06	S	<=	1	S	<=	2	S	neg	FOLA-Q1H,I20L:FOLP_173-ins
20152898	72	>65	SAMN05221101	116	32561	84851	2121698	19F	2	654	2	0	0	<=	0.03	S	S	<=	0.03	S	<=	0.06	S	<=	0.06	S	S	<=	0.5	S	S	<=	0.5	S	neg	=	0.06	S	=	0.06	S	<=	1	S	<=	2	S	neg	neg
20152899	81	>65	SAMN05221102	81	63919	163142	2137841	23B	neg	1847	0	0	0	<=	0.03	S	S	<=	0.03	S	<=	0.06	S	<=	0.06	S	S	<=	0.5	S	S	<=	0.5	S	R23S1-C9T	=	0.06	S	=	0.06	S	<=	1	S	<=	2	S	neg	neg
20152900	77	>65	SAMN05221103	65	79489	178138	2129661	16F	neg	1292	19	31	8	=	1	R	S	=	1	S	=	0.12	S	=	0.25	S	S	<=	0.5	S	S	=	2	R	MEF	=	8	R	=	0.06	S	<=	1	S	<=	2	S	neg	FOLA-Q1H,I20L:FOLP_173-ins
20152901	2	0-4	SAMN05221104	31	146791	267531	2016598	33F	neg	100	2	0	6	<=	0.03	S	S	<=	0.03	S	<=	0.06	S	<=	0.06	S	S	<=	0.5	S	S	<=	0.5	S	neg	=	0.06	S	=	0.06	S	<=	1	S	<=	2	S	neg	FOLP_189-ins
20152902	67	>65	SAMN05221105	53	71572	191058	1983772	12F	neg	220	0	0	17	<=	0.03	S	S	<=	0.03	S	<=	0.06	S	<=	0.06	S	S	<=	0.5	S	S	<=	0.5	S	neg	=	0.06	S	=	0.06	S	<=	1	S	<=	2	S	neg	neg
20152903	38	19to64	SAMN05221106	78	49741	154618	2079751	22F	neg	433	1	2	59	<=	0.03	S	S	<=	0.03	S	<=	0.06	S	<=	0.06	S	S	<=	0.5	S	S	<=	0.5	S	MEF	=	8	R	=	0.06	S	<=	1	S	<=	2	S	neg	neg
20152904	73	>65	SAMN05221107	127	32036	115878	2112768	23A	neg	8080	0	1	1	=	0.25	R	S	=	0.06	S	<=	0.06	S	=	0.12	S	S	<=	0.5	S	S	<=	0.5	S	neg	=	0.06	S	=	0.06	S	<=	1	S	<=	2	S	neg	FOLA-I20L
20152905	30	19to64	SAMN05221108	53	92016	168621	2093887	17F	neg	10465	1	4	129	=	0.12	R	S	<=	0.03	S	<=	0.06	S	=	0.12	S	S	<=	0.5	S	S	<=	0.5	S	neg	=	0.06	S	=	0.06	S	<=	1	S	<=	2	S	neg	neg
20152906	24	19to64	SAMN05221109	105	34234	96743	2096813	9N	neg	632	1	0	0	<=	0.03	S	S	<=	0.03	S	<=	0.06	S	<=	0.06	S	S	<=	0.5	S	S	<=	0.5	S	neg	=	0.06	S	=	0.06	S	<=	1	S	<=	2	S	neg	neg
20152907	58	19to64	SAMN05221110	25	279267	528518	2053277	3	neg	180	2	0	111	=	0.06	S	S	=	0.06	S	<=	0.06	S	=	0.25	S	S	<=	0.5	S	S	=	1	I	ERMB	>	32	R	>	2	R	<=	1	S	<=	2	S	pos	neg
20152908	57	19to64	SAMN05221111	84	61114	142589	2098200	20	neg	1257	1	4	2	<=	0.03	S	S	<=	0.03	S	<=	0.06	S	<=	0.06	S	S	<=	0.5	S	S	<=	0.5	S	neg	=	0.06	S	=	0.06	S	<=	1	S	<=	2	S	neg	neg
20152909	48	19to64	SAMN05221112	39	203038	331058	2081835	15A	neg	63	24	27	131	=	0.5	R	S	=	0.25	S	=	0.12	S	=	0.5	S	S	=	1	I	S	>	2	R	ERMB	>	32	R	>	2	R	<=	1	S	<=	2	S	pos	neg
20152910	59	19to64	SAMN05221113	41	112222	260028	2147179	23F	neg	81	15	12	18	=	2	R	S	=	2	S	=	0.5	I	=	1	I	S	=	1	I	S	>	2	R	MEF	=	8	R	=	0.06	S	<=	1	S	<=	2	S	neg	FOLA-Q1H,Q11H,E14D,I20L:FOLP_195-ins
20152911	2	0-4	SAMN05221114	42	177913	286543	2139813	23B	neg	1373	0	1	1	=	0.25	R	S	=	0.06	S	<=	0.06	S	=	0.12	S	S	<=	0.5	S	S	<=	0.5	S	neg	=	0.06	S	=	0.06	S	<=	1	S	<=	2	S	neg	FOLP_180-ins
20152912	72	>65	SAMN05221115	51	102593	298496	2062668	22F	neg	7314	1	2	2	<=	0.03	S	S	<=	0.03	S	<=	0.06	S	<=	0.06	S	S	<=	0.5	S	S	<=	0.5	S	MEF	=	8	R	=	0.06	S	<=	1	S	<=	2	S	neg	neg
20152913	60	19to64	SAMN05221116	53	93439	308413	2062445	12F	neg	11249	0	0	2	<=	0.03	S	S	<=	0.03	S	<=	0.06	S	<=	0.06	S	S	<=	0.5	S	S	<=	0.5	S	neg	=	0.06	S	=	0.06	S	<=	1	S	<=	2	S	neg	neg
20152916	62	19to64	SAMN05221117	112	40386	90307	2114887	6B	1	1845	39	36	130	=	4	R	I	=	4	I	=	1	R	=	0.5	S	S	=	1	I	S	=	2	R	MEF	=	8	R	=	0.06	S	<=	1	S	<=	2	S	neg	FOLA-D12G,E14D,I20L:FOLP_186-ins
20152917	67	>65	SAMN05221118	22	205272	522756	2058758	33F	neg	100	2	0	6	<=	0.03	S	S	<=	0.03	S	<=	0.06	S	<=	0.06	S	S	<=	0.5	S	S	<=	0.5	S	MEF	=	8	R	=	0.06	S	<=	1	S	<=	2	S	neg	FOLP_189-ins
20152918	44	19to64	SAMN05221119	38	288717	417331	2032642	3	neg	180	2	0	2	<=	0.03	S	S	<=	0.03	S	<=	0.06	S	<=	0.06	S	S	<=	0.5	S	S	<=	0.5	S	neg	=	0.06	S	=	0.06	S	<=	1	S	<=	2	S	neg	neg
20152919	54	19to64	SAMN05221120	55	101899	237927	2089413	10A	neg	816	0	0	132	<=	0.03	S	S	<=	0.03	S	<=	0.06	S	<=	0.06	S	S	<=	0.5	S	S	<=	0.5	S	neg	=	0.06	S	=	0.06	S	<=	1	S	<=	2	S	neg	neg
20152920	4	0-4	SAMN05221121	44	217853	333001	2144816	23B	neg	1373	0	1	1	=	0.25	R	S	=	0.06	S	<=	0.06	S	=	0.12	S	S	<=	0.5	S	S	<=	0.5	S	neg	=	0.06	S	=	0.06	S	<=	1	S	<=	2	S	neg	FOLP_180-ins
20152921	0	0-4	SAMN05221122	66	88456	219994	2063268	11A	neg	62	2	6	10	<=	0.03	S	S	<=	0.03	S	<=	0.06	S	<=	0.06	S	S	<=	0.5	S	S	<=	0.5	S	neg	=	0.06	S	=	0.06	S	<=	1	S	<=	2	S	neg	FOLP_182-ins
20152922	6	5to18	SAMN05221123	22	206797	522724	2058398	33F	neg	100	2	0	6	<=	0.03	S	S	<=	0.03	S	<=	0.06	S	<=	0.06	S	S	<=	0.5	S	S	<=	0.5	S	MEF	=	8	R	=	0.06	S	<=	1	S	<=	2	S	neg	FOLP_189-ins
20152948	55	19to64	SAMN05221125	63	81669	383364	2015188	9N	neg	405	23	0	0	<=	0.03	S	S	<=	0.03	S	<=	0.06	S	<=	0.06	S	S	<=	0.5	S	S	<=	0.5	S	neg	=	0.06	S	=	0.06	S	<=	1	S	<=	2	S	neg	neg
20152949	75	>65	SAMN05221126	62	113645	405398	2099638	9N	neg	632	1	0	0	<=	0.03	S	S	<=	0.03	S	<=	0.06	S	<=	0.06	S	S	<=	0.5	S	S	<=	0.5	S	neg	=	0.06	S	=	0.06	S	<=	1	S	<=	2	S	neg	neg
20152950	50	19to64	SAMN05221127	47	102834	466767	2039596	9N	neg	405	23	0	0	<=	0.03	S	S	<=	0.03	S	<=	0.06	S	<=	0.06	S	S	<=	0.5	S	S	<=	0.5	S	neg	=	0.06	S	=	0.06	S	<=	1	S	<=	2	S	neg	neg
20152951	51	19to64	SAMN05221128	61	168274	425850	2069946	23A	neg	42	2	0	6	<=	0.03	S	S	<=	0.03	S	<=	0.06	S	<=	0.06	S	S	<=	0.5	S	S	<=	0.5	S	neg	=	0.06	S	=	0.06	S	<=	1	S	<=	2	S	neg	neg
20152952	85	>65	SAMN05221129	49	111898	203475	2089896	16F	neg	3157	0	0	3	<=	0.03	S	S	<=	0.03	S	<=	0.06	S	<=	0.06	S	S	<=	0.5	S	S	<=	0.5	S	neg	=	0.06	S	=	0.06	S	<=	1	S	<=	2	S	neg	neg
20152953	55	19to64	SAMN05221130	45	103273	220944	2047758	35B	1	558	4	7	7	=	2	R	S	=	4	I	=	0.5	I	=	1	I	S	=	1	I	S	>	2	R	MEF	=	8	R	=	0.06	S	<=	1	S	<=	2	S	neg	neg
20152954	84	>65	SAMN05221131	41	106168	268101	2048884	35B	1	558	4	7	7	=	2	R	S	=	4	I	=	0.5	I	=	1	I	S	=	1	I	S	>	2	R	MEF	=	8	R	=	0.06	S	<=	1	S	<=	2	S	neg	neg
20152955	72	>65	SAMN05221132	54	81627	199299	2096406	20	neg	1257	2	4	2	<=	0.03	S	S	<=	0.03	S	<=	0.06	S	<=	0.06	S	S	<=	0.5	S	S	<=	0.5	S	neg	=	0.06	S	=	0.06	S	<=	1	S	<=	2	S	neg	neg
20152956	6	5to18	SAMN05221133	82	65327	138681	2100508	7C	neg	1797	2	4	6	<=	0.03	S	S	<=	0.03	S	<=	0.06	S	<=	0.06	S	S	<=	0.5	S	S	<=	0.5	S	neg	=	0.06	S	=	0.06	S	<=	1	S	<=	2	S	neg	neg
20152957	2	0-4	SAMN05221134	42	121707	249917	2085407	15A	neg	63	24	27	28	=	0.25	R	S	<=	0.03	S	<=	0.06	S	=	0.12	S	S	<=	0.5	S	S	<=	0.5	S	ERMB:ERMBUP	>	32	R	>	2	R	<=	1	S	<=	2	S	pos	neg
20152958	59	19to64	SAMN05221135	56	84105	172503	2047891	22F	neg	433	1	2	2	<=	0.03	S	S	<=	0.03	S	<=	0.06	S	<=	0.06	S	S	<=	0.5	S	S	<=	0.5	S	neg	=	0.06	S	=	0.06	S	<=	1	S	<=	2	S	neg	neg
20152959	64	19to64	SAMN05221136	58	81981	222401	2111585	23A	neg	338	0	1	1	=	0.25	R	S	=	0.06	S	<=	0.06	S	=	0.12	S	S	<=	0.5	S	S	<=	0.5	S	neg	=	0.06	S	=	0.06	S	<=	1	S	<=	2	S	neg	FOLA-I20L
20152960	81	>65	SAMN05221137	44	104853	243349	2051092	35B	1	558	4	7	7	=	2	R	S	=	4	I	=	0.5	I	=	1	I	S	=	1	I	S	>	2	R	MEF	=	8	R	=	0.06	S	<=	1	S	<=	2	S	neg	neg
20152961	91	>65	SAMN05221138	35	127887	269675	2061937	33F	neg	100	2	0	6	<=	0.03	S	S	<=	0.03	S	<=	0.06	S	<=	0.06	S	S	<=	0.5	S	S	<=	0.5	S	MEF	=	8	R	=	0.06	S	<=	1	S	<=	2	S	neg	FOLP_189-ins
20152962	71	>65	SAMN05221139	56	83998	172483	2078484	22F	neg	433	1	2	2	<=	0.03	S	S	<=	0.03	S	<=	0.06	S	<=	0.06	S	S	<=	0.5	S	S	<=	0.5	S	neg	=	0.06	S	=	0.06	S	<=	1	S	<=	2	S	neg	neg
20152963	53	19to64	SAMN05221140	60	93429	259272	2076640	6C	neg	1390	2	0	2	<=	0.03	S	S	<=	0.03	S	<=	0.06	S	<=	0.06	S	S	<=	0.5	S	S	<=	0.5	S	neg	=	0.06	S	=	0.06	S	<=	1	S	<=	2	S	neg	neg
20152964	75	>65	SAMN05221141	68	81075	187288	2077743	10A	neg	816	0	0	2	<=	0.03	S	S	<=	0.03	S	<=	0.06	S	<=	0.06	S	S	<=	0.5	S	S	<=	0.5	S	neg	=	0.06	S	=	0.06	S	<=	1	S	<=	2	S	neg	neg
20152965	61	19to64	SAMN05221142	138	32000	104181	2172047	19A	1	695	8	0	11	=	0.12	R	S	=	0.06	S	<=	0.06	S	<=	0.06	S	S	<=	0.5	S	S	<=	0.5	S	neg	=	0.06	S	=	0.06	S	<=	1	S	<=	2	S	neg	neg
20152966	63	19to64	SAMN05221143	57	104372	257508	2169384	6C	1	138	0	0	3	<=	0.03	S	S	<=	0.03	S	<=	0.06	S	<=	0.06	S	S	<=	0.5	S	S	<=	0.5	S	neg	=	0.06	S	=	0.06	S	<=	1	S	<=	2	S	neg	FOLP_180-ins
20152968	80	>65	SAMN05221144	117	42589	176738	2175912	19A	1	695	8	0	11	=	0.12	R	S	=	0.06	S	<=	0.06	S	<=	0.06	S	S	<=	0.5	S	S	<=	0.5	S	MEF	=	8	R	=	0.06	S	<=	1	S	<=	2	S	neg	neg
20152969	94	>65	SAMN05221145	90	60227	139135	2141086	7C	1	7260	2	4	6	<=	0.03	S	S	<=	0.03	S	<=	0.06	S	<=	0.06	S	S	<=	0.5	S	S	<=	0.5	S	neg	=	0.06	S	=	0.06	S	<=	1	S	<=	2	S	neg	neg
20152970	61	19to64	SAMN05221146	155	54072	144848	2070845	19F	1:2	236	27	77	8	=	4	R	I	=	8	R	=	1	R	=	1	I	S	=	2	R	I	>	2	R	neg	=	0.06	S	=	0.06	S	<=	1	S	<=	2	S	neg	FOLA-Q1H,I20L:FOLP_186-ins
20152998	64	19to64	SAMN05221147	44	88211	193078	2046627	11A	2	62	2	6	0	<=	0.03	S	S	<=	0.03	S	<=	0.06	S	<=	0.06	S	S	<=	0.5	S	S	<=	0.5	S	neg	=	0.06	S	=	0.06	S	<=	1	S	<=	2	S	neg	neg
20152999	86	>65	SAMN05221148	55	84679	183039	2092370	15A	1	3811	1	0	0	<=	0.03	S	S	<=	0.03	S	<=	0.06	S	<=	0.06	S	S	<=	0.5	S	S	<=	0.5	S	neg	=	0.06	S	=	0.06	S	<=	1	S	<=	2	S	neg	neg
20153000	64	19to64	SAMN05221149	43	116910	190192	2094302	9N	neg	632	69	0	0	<=	0.03	S	S	<=	0.03	S	<=	0.06	S	<=	0.06	S	S	<=	0.5	S	S	<=	0.5	S	neg	=	0.06	S	=	0.06	S	<=	1	S	<=	2	S	neg	neg
20153001	56	19to64	SAMN05221150	37	140114	392903	1987431	12F	neg	218	0	0	11	=	0.06	S	S	=	0.06	S	<=	0.06	S	<=	0.06	S	S	<=	0.5	S	S	<=	0.5	S	neg	=	0.06	S	=	0.06	S	<=	1	S	<=	2	S	neg	neg
20153002	54	19to64	SAMN05221151	57	77128	237672	2074889	9N	neg	66	1	0	0	<=	0.03	S	S	<=	0.03	S	<=	0.06	S	<=	0.06	S	S	<=	0.5	S	S	<=	0.5	S	neg	=	0.06	S	=	0.06	S	<=	1	S	<=	2	S	neg	neg
20153003	34	19to64	SAMN05221152	45	126700	310030	2116804	23A	neg	338	0	1	1	=	0.25	R	S	=	0.06	S	<=	0.06	S	=	0.12	S	S	<=	0.5	S	S	<=	0.5	S	MEF	=	8	R	=	0.06	S	<=	1	S	<=	2	S	neg	neg
20153004	23	19to64	SAMN05221153	41	106153	256687	2015509	35B	1	558	4	7	7	=	2	R	S	=	4	I	=	0.5	I	=	1	I	S	=	1	I	S	>	2	R	MEF	=	8	R	=	0.06	S	<=	1	S	<=	2	S	neg	neg
20153005	74	>65	SAMN05221154	77	94276	249888	2120406	15C	neg	199	2	0	2	<=	0.03	S	S	<=	0.03	S	<=	0.06	S	<=	0.06	S	S	<=	0.5	S	S	<=	0.5	S	neg	=	0.06	S	=	0.06	S	<=	1	S	<=	2	S	neg	neg
20153006	50	19to64	SAMN05221155	41	121788	300421	2089863	9N	neg	632	1	0	0	<=	0.03	S	S	<=	0.03	S	<=	0.06	S	<=	0.06	S	S	<=	0.5	S	S	<=	0.5	S	neg	=	0.06	S	=	0.06	S	<=	1	S	<=	2	S	neg	neg
20153007	66	>65	SAMN05221156	60	77846	200554	2076507	22F	neg	433	1	2	2	<=	0.03	S	S	<=	0.03	S	<=	0.06	S	<=	0.06	S	S	<=	0.5	S	S	<=	0.5	S	MEF	=	8	R	=	0.06	S	<=	1	S	<=	2	S	neg	neg
20153008	54	19to64	SAMN05221157	35	188362	273548	2024680	8	neg	53	3	6	5	<=	0.03	S	S	<=	0.03	S	<=	0.06	S	<=	0.06	S	S	<=	0.5	S	S	<=	0.5	S	neg	=	0.06	S	=	0.06	S	<=	1	S	<=	2	S	neg	neg
20153009	90	>65	SAMN05221158	71	85710	311229	2199192	6C	1	490	1	4	2	<=	0.03	S	S	<=	0.03	S	<=	0.06	S	<=	0.06	S	S	<=	0.5	S	S	<=	0.5	S	MEF	=	8	R	=	0.06	S	<=	1	S	<=	2	S	neg	FOLA-Q1Y,I20L
20153010	14	5to18	SAMN05221159	47	187157	402490	2131800	21	neg	432	0	0	2	<=	0.03	S	S	<=	0.03	S	<=	0.06	S	<=	0.06	S	S	<=	0.5	S	S	<=	0.5	S	neg	=	0.06	S	=	0.06	S	<=	1	S	<=	2	S	neg	neg
20153011	44	19to64	SAMN05221160	58	86022	172907	2027066	11A	2	62	2	6	0	<=	0.03	S	S	<=	0.03	S	<=	0.06	S	<=	0.06	S	S	<=	0.5	S	S	<=	0.5	S	neg	=	0.06	S	=	0.06	S	<=	1	S	<=	2	S	neg	neg
20153012	6	5to18	SAMN05221161	47	103177	162451	2003803	3	neg	180	2	3	2	<=	0.03	S	S	<=	0.03	S	<=	0.06	S	<=	0.06	S	S	<=	0.5	S	S	<=	0.5	S	neg	=	0.06	S	=	0.06	S	<=	1	S	<=	2	S	neg	neg
20153013	47	19to64	SAMN05221162	92	63571	116323	2234146	6C	1	490	1	4	2	<=	0.03	S	S	<=	0.03	S	<=	0.06	S	<=	0.06	S	S	<=	0.5	S	S	<=	0.5	S	MEF	=	8	R	=	0.06	S	<=	1	S	<=	2	S	neg	FOLA-Q1Y,I20L
20153014	56	19to64	SAMN05221163	50	123174	309683	2127099	23B	neg	439	0	0	0	<=	0.03	S	S	<=	0.03	S	<=	0.06	S	<=	0.06	S	S	<=	0.5	S	S	<=	0.5	S	MEF	=	8	R	=	0.06	S	<=	1	S	<=	2	S	neg	neg
20153015	1	0-4	SAMN05221164	64	111333	305887	2102464	23A	neg	338	0	1	1	=	0.25	R	S	=	0.06	S	<=	0.06	S	=	0.12	S	S	<=	0.5	S	S	<=	0.5	S	neg	=	0.06	S	=	0.06	S	<=	1	S	<=	2	S	neg	neg
20153016	81	>65	SAMN05221165	104	44008	177864	2082046	23A	neg	10147	2	0	6	<=	0.03	S	S	<=	0.03	S	<=	0.06	S	<=	0.06	S	S	<=	0.5	S	S	<=	0.5	S	neg	=	0.06	S	=	0.06	S	<=	1	S	<=	2	S	neg	neg
20153017	58	19to64	SAMN05221166	54	130555	295307	2114736	23B	neg	439	0	0	0	<=	0.03	S	S	<=	0.03	S	<=	0.06	S	<=	0.06	S	S	<=	0.5	S	S	<=	0.5	S	neg	=	0.06	S	=	0.06	S	<=	1	S	<=	2	S	neg	neg
20153018	0	0-4	SAMN05221167	65	77822	203849	2079016	22F	neg	433	1	2	2	<=	0.03	S	S	<=	0.03	S	<=	0.06	S	<=	0.06	S	S	<=	0.5	S	S	<=	0.5	S	neg	=	0.06	S	=	0.06	S	<=	1	S	<=	2	S	neg	neg
20153019	77	>65	SAMN05221168	62	69108	223360	2077979	22F	neg	433	1	2	2	<=	0.03	S	S	<=	0.03	S	<=	0.06	S	<=	0.06	S	S	<=	0.5	S	S	<=	0.5	S	neg	=	0.06	S	=	0.06	S	<=	1	S	<=	2	S	neg	neg
20153020	21	19to64	SAMN05221169	67	69814	222900	2087716	19F	1:2	2890	13	16	47	=	2	R	S	=	2	S	=	0.5	I	=	1	I	S	=	1	I	S	>	2	R	ERMB:ERMBUP	>	32	R	>	2	R	<=	1	S	<=	2	S	pos	FOLA-Q1Y,Q11H,E14D,I20L:FOLP_182-ins
20153021	60	19to64	SAMN05221170	54	78682	176952	2054774	35B	1	558	4	7	133	=	2	R	S	=	4	I	=	0.5	I	=	1	I	S	=	1	I	S	>	2	R	MEF	=	8	R	=	0.06	S	<=	1	S	<=	2	S	neg	neg
20153022	50	19to64	SAMN05221171	72	62679	199647	2116512	10A	neg	816	0	0	2	<=	0.03	S	S	<=	0.03	S	<=	0.06	S	<=	0.06	S	S	<=	0.5	S	S	<=	0.5	S	neg	=	0.06	S	=	0.06	S	<=	1	S	<=	2	S	neg	neg
20153023	47	19to64	SAMN05221172	26	220326	636309	2073644	33F	neg	2705	2	0	6	<=	0.03	S	S	<=	0.03	S	<=	0.06	S	<=	0.06	S	S	<=	0.5	S	S	<=	0.5	S	MEF	=	8	R	=	0.06	S	<=	1	S	<=	2	S	neg	FOLP_189-ins
20153024	51	19to64	SAMN05221173	48	100257	297353	2087937	9N	neg	1257	1	4	2	<=	0.03	S	S	<=	0.03	S	<=	0.06	S	<=	0.06	S	S	<=	0.5	S	S	<=	0.5	S	neg	=	0.06	S	=	0.06	S	<=	1	S	<=	2	S	neg	neg
20153027	93	>65	SAMN05221176	115	30665	141168	2135648	23A	neg	338	19	1	24	=	0.5	R	S	=	0.25	S	<=	0.06	S	=	0.25	S	S	<=	0.5	S	S	<=	0.5	S	ERMB	>	32	R	>	2	R	<=	1	S	<=	2	S	pos	neg
20153028	23	19to64	SAMN05221177	54	114713	333867	2057789	16F	neg	995	9	4	3	<=	0.03	S	S	<=	0.03	S	<=	0.06	S	<=	0.06	S	S	<=	0.5	S	S	<=	0.5	S	neg	=	0.06	S	=	0.06	S	<=	1	S	<=	2	S	neg	neg
20153030	43	19to64	SAMN05221178	127	45656	135052	2129394	19F	neg	1797	2	4	6	<=	0.03	S	S	<=	0.03	S	<=	0.06	S	<=	0.06	S	S	<=	0.5	S	S	<=	0.5	S	neg	=	0.06	S	=	0.06	S	<=	1	S	<=	2	S	neg	neg
20153031	61	19to64	SAMN05221179	128	43142	98508	2077137	22F	neg	433	1	2	2	<=	0.03	S	S	<=	0.03	S	<=	0.06	S	<=	0.06	S	S	<=	0.5	S	S	<=	0.5	S	neg	=	0.06	S	=	0.06	S	<=	1	S	<=	2	S	neg	neg
20153032	48	19to64	SAMN05221180	164	43356	103376	2134647	4	1	205	0	0	3	<=	0.03	S	S	<=	0.03	S	<=	0.06	S	<=	0.06	S	S	<=	0.5	S	S	<=	0.5	S	neg	=	0.06	S	=	0.06	S	<=	1	S	<=	2	S	neg	neg
20153033	50	19to64	SAMN05221181	69	68537	243305	2061476	22F	neg	11848	1	2	2	<=	0.03	S	S	<=	0.03	S	<=	0.06	S	<=	0.06	S	S	<=	0.5	S	S	<=	0.5	S	MEF	=	8	R	=	0.06	S	<=	1	S	<=	2	S	neg	neg
20153035	0	0-4	SAMN05221182	84	64211	146818	2110113	15B	neg	1262	14	0	2	<=	0.03	S	S	<=	0.03	S	<=	0.06	S	<=	0.06	S	S	<=	0.5	S	S	<=	0.5	S	neg	=	0.06	S	=	0.06	S	<=	1	S	<=	2	S	neg	FOLP_176-ins
20153036	58	19to64	SAMN05221183	100	52601	162890	2023614	31	neg	568	12	0	0	<=	0.03	S	S	<=	0.03	S	<=	0.06	S	<=	0.06	S	S	<=	0.5	S	S	<=	0.5	S	neg	=	0.06	S	=	0.06	S	<=	1	S	<=	2	S	neg	neg
20153037	50	19to64	SAMN05221184	52	130145	264166	2027180	3	neg	180	2	3	2	<=	0.03	S	S	<=	0.03	S	<=	0.06	S	<=	0.06	S	S	<=	0.5	S	S	<=	0.5	S	neg	=	0.06	S	=	0.06	S	<=	1	S	<=	2	S	neg	neg
20153038	48	19to64	SAMN05221185	57	102625	296800	2060246	22F	neg	7314	1	2	2	<=	0.03	S	S	<=	0.03	S	<=	0.06	S	<=	0.06	S	S	<=	0.5	S	S	<=	0.5	S	MEF	=	8	R	=	0.06	S	<=	1	S	<=	2	S	neg	neg
20153126	52	19to64	SAMN05221187	120	46755	201872	2066290	22F	neg	433	1	2	2	<=	0.03	S	S	<=	0.03	S	<=	0.06	S	<=	0.06	S	S	<=	0.5	S	S	<=	0.5	S	neg	=	0.06	S	=	0.06	S	<=	1	S	<=	2	S	neg	neg
20153128	1	0-4	SAMN05221188	38	157564	332949	2136651	23B	neg	1373	0	1	1	=	0.25	R	S	=	0.06	S	<=	0.06	S	=	0.12	S	S	<=	0.5	S	S	<=	0.5	S	neg	=	0.06	S	=	0.06	S	<=	1	S	<=	2	S	neg	FOLP_180-ins
20153129	76	>65	SAMN05221189	79	77128	172765	2094396	15A	1	3811	1	0	0	<=	0.03	S	S	<=	0.03	S	<=	0.06	S	<=	0.06	S	S	<=	0.5	S	S	<=	0.5	S	neg	=	0.06	S	=	0.06	S	<=	1	S	<=	2	S	neg	neg
20153130	44	19to64	SAMN05221190	212	41263	153450	2023624	22F	neg	433	1	2	2	<=	0.03	S	S	<=	0.03	S	<=	0.06	S	<=	0.06	S	S	<=	0.5	S	S	<=	0.5	S	neg	=	0.06	S	=	0.06	S	<=	1	S	<=	2	S	neg	neg
20153131	63	19to64	SAMN05221191	63	77364	201056	2074844	22F	neg	433	1	2	2	<=	0.03	S	S	<=	0.03	S	<=	0.06	S	<=	0.06	S	S	<=	0.5	S	S	<=	0.5	S	neg	=	0.06	S	=	0.06	S	<=	1	S	<=	2	S	neg	neg
20153135	65	>65	SAMN05221193	245	50006	162347	2031588	31	neg	568	12	0	0	<=	0.03	S	S	<=	0.03	S	<=	0.06	S	<=	0.06	S	S	<=	0.5	S	S	<=	0.5	S	neg	=	0.06	S	=	0.06	S	<=	1	S	<=	2	S	neg	neg
20153136	73	>65	SAMN05221194	179	35241	113353	2090609	20	neg	235	1	4	2	<=	0.03	S	S	<=	0.03	S	<=	0.06	S	<=	0.06	S	S	<=	0.5	S	S	<=	0.5	S	neg	=	0.06	S	=	0.06	S	<=	1	S	<=	2	S	neg	neg
20153137	6	5to18	SAMN05221195	159	38643	185625	2110657	19F	2	654	2	0	0	<=	0.03	S	S	<=	0.03	S	<=	0.06	S	<=	0.06	S	S	<=	0.5	S	S	<=	0.5	S	neg	=	0.06	S	=	0.06	S	<=	1	S	<=	2	S	neg	neg
20153138	68	>65	SAMN05221196	1030	32579	84592	2137262	11A	2	6605	2	6	0	<=	0.03	S	S	<=	0.03	S	<=	0.06	S	<=	0.06	S	S	<=	0.5	S	S	<=	0.5	S	neg	=	0.06	S	=	0.06	S	<=	1	S	<=	2	S	neg	neg
20153139	56	19to64	SAMN05221197	82	59191	148197	1978950	3	neg	180	2	0	2	<=	0.03	S	S	<=	0.03	S	<=	0.06	S	<=	0.06	S	S	<=	0.5	S	S	<=	0.5	S	neg	=	0.06	S	=	0.06	S	<=	1	S	<=	2	S	neg	neg
20153141	52	19to64	SAMN05221199	940	17848	55654	2067156	3	neg	180	2	3	2	<=	0.03	S	S	<=	0.03	S	<=	0.06	S	<=	0.06	S	S	<=	0.5	S	S	<=	0.5	S	neg	=	0.06	S	=	0.06	S	<=	1	S	<=	2	S	neg	neg
20153173	61	19to64	SAMN05221201	107	42216	118511	2028274	12F	neg	11249	0	0	2	<=	0.03	S	S	<=	0.03	S	<=	0.06	S	<=	0.06	S	S	<=	0.5	S	S	<=	0.5	S	neg	=	0.06	S	=	0.06	S	<=	1	S	<=	2	S	neg	neg
20153174	54	19to64	SAMN05221202	108	49577	131667	2012548	8	neg	1480	3	5	5	<=	0.03	S	S	<=	0.03	S	<=	0.06	S	<=	0.06	S	S	<=	0.5	S	S	<=	0.5	S	neg	=	0.06	S	=	0.06	S	<=	1	S	<=	2	S	neg	neg
20153176	72	>65	SAMN05221203	129	52349	181790	2071447	22F	neg	433	1	2	2	<=	0.03	S	S	<=	0.03	S	<=	0.06	S	<=	0.06	S	S	<=	0.5	S	S	<=	0.5	S	neg	=	0.06	S	=	0.06	S	<=	1	S	<=	2	S	neg	neg
20153177	81	>65	SAMN05221204	191	21429	59297	2133188	19F	2	654	2	0	0	<=	0.03	S	S	<=	0.03	S	<=	0.06	S	<=	0.06	S	S	<=	0.5	S	S	<=	0.5	S	neg	=	0.06	S	=	0.06	S	<=	1	S	<=	2	S	neg	neg
20153178	59	19to64	SAMN05221205	77	61204	164146	2023810	12F	neg	11249	0	0	2	<=	0.03	S	S	<=	0.03	S	<=	0.06	S	<=	0.06	S	S	<=	0.5	S	S	<=	0.5	S	neg	=	0.06	S	=	0.06	S	<=	1	S	<=	2	S	neg	neg
20153179	62	19to64	SAMN05221206	70	69936	198980	1997272	8	neg	1480	3	5	5	<=	0.03	S	S	<=	0.03	S	<=	0.06	S	<=	0.06	S	S	<=	0.5	S	S	<=	0.5	S	neg	=	0.06	S	=	0.06	S	<=	1	S	<=	2	S	neg	neg
20153180	48	19to64	SAMN05221207	129	43677	106602	2015285	7F	2	191	2	0	2	<=	0.03	S	S	<=	0.03	S	<=	0.06	S	<=	0.06	S	S	<=	0.5	S	S	<=	0.5	S	MEF	=	8	R	=	0.06	S	<=	1	S	<=	2	S	neg	neg
20153181	64	19to64	SAMN05221208	161	34815	109989	2053192	10A	neg	97	0	0	2	<=	0.03	S	S	<=	0.03	S	<=	0.06	S	<=	0.06	S	S	<=	0.5	S	S	<=	0.5	S	neg	=	0.06	S	=	0.06	S	<=	1	S	<=	2	S	neg	neg
20153182	70	>65	SAMN05221209	153	23626	74471	2086062	22F	neg	433	1	2	2	<=	0.03	S	S	<=	0.03	S	<=	0.06	S	<=	0.06	S	S	<=	0.5	S	S	<=	0.5	S	neg	=	0.06	S	=	0.06	S	<=	1	S	<=	2	S	neg	neg
20153183	66	>65	SAMN05221210	212	24847	62255	2159431	19F	2	251	2	0	0	<=	0.03	S	S	<=	0.03	S	<=	0.06	S	<=	0.06	S	S	<=	0.5	S	S	<=	0.5	S	neg	=	0.06	S	=	0.06	S	<=	1	S	<=	2	S	neg	neg
20153187	52	19to64	SAMN05221211	77	49300	192960	1974509	3	neg	180	2	0	2	<=	0.03	S	S	<=	0.03	S	<=	0.06	S	<=	0.06	S	S	<=	0.5	S	S	<=	0.5	S	neg	=	0.06	S	=	0.06	S	<=	1	S	<=	2	S	neg	neg
20153188	41	19to64	SAMN05221212	183	22866	59665	2092445	22F	neg	433	1	NF	2	<=	0.03	S	S	<=	0.03	S	<=	0.06	S	<=	0.06	S	S	<=	0.03	S	S	<=	0.5	S	neg	=	0.06	S	=	0.06	S	<=	1	S	<=	2	S	neg	neg
20153189	2	0-4	SAMN05221213	226	35522	82441	2206529	19A	1	695	8	0	11	=	0.12	R	S	=	0.06	S	<=	0.06	S	<=	0.06	S	S	<=	0.5	S	S	<=	0.5	S	neg	=	0.06	S	=	0.06	S	<=	1	S	<=	2	S	neg	neg
20153190	39	19to64	SAMN05221214	120	48900	113481	2020441	4	neg	10172	1	0	0	<=	0.03	S	S	<=	0.03	S	<=	0.06	S	<=	0.06	S	S	<=	0.5	S	S	<=	0.5	S	neg	=	0.06	S	=	0.06	S	<=	1	S	<=	2	S	neg	FOLP_178-ins
20153191	62	19to64	SAMN05221215	116	47277	211439	2139713	23A	neg	338	0	1	1	=	0.25	R	S	=	0.06	S	<=	0.06	S	=	0.12	S	S	<=	0.5	S	S	<=	0.5	S	neg	=	0.06	S	=	0.06	S	<=	1	S	<=	2	S	neg	neg
20153192	58	19to64	SAMN05221216	136	27436	87502	2034638	12F	neg	218	0	0	0	<=	0.03	S	S	<=	0.03	S	<=	0.06	S	<=	0.06	S	S	<=	0.5	S	S	<=	0.5	S	MEF	=	8	R	=	0.06	S	<=	1	S	<=	2	S	neg	neg
20153193	54	19to64	SAMN05221217	105	35715	113099	2082002	20	neg	1257	1	4	2	<=	0.03	S	S	<=	0.03	S	<=	0.06	S	<=	0.06	S	S	<=	0.5	S	S	<=	0.5	S	neg	=	0.06	S	=	0.06	S	<=	1	S	<=	2	S	neg	neg
20153194	43	19to64	SAMN05221218	164	23744	95079	2096177	22F	neg	433	1	2	2	<=	0.03	S	S	<=	0.03	S	<=	0.06	S	<=	0.06	S	S	<=	0.5	S	S	<=	0.5	S	neg	=	0.06	S	=	0.06	S	<=	1	S	<=	2	S	neg	neg
20153195	62	19to64	SAMN05221219	152	24146	73000	2028228	12F	neg	218	0	0	0	<=	0.03	S	S	<=	0.03	S	<=	0.06	S	<=	0.06	S	S	<=	0.5	S	S	<=	0.5	S	MEF	=	8	R	=	0.06	S	<=	1	S	<=	2	S	neg	neg
20153196	46	19to64	SAMN05221220	69	64454	199516	2006619	11A	neg	10467	2	4	10	<=	0.03	S	S	<=	0.03	S	<=	0.06	S	<=	0.06	S	S	<=	0.5	S	S	<=	0.5	S	neg	=	0.06	S	=	0.06	S	<=	1	S	<=	2	S	neg	FOLP_189-ins
20153197	49	19to64	SAMN05221221	116	43727	125235	2018579	12F	neg	218	0	0	0	<=	0.03	S	S	<=	0.03	S	<=	0.06	S	<=	0.06	S	S	<=	0.5	S	S	<=	0.5	S	MEF	=	8	R	=	0.06	S	<=	1	S	<=	2	S	neg	neg
20153198	87	>65	SAMN05221222	31	100112	299311	1995467	8	neg	1480	3	2	5	<=	0.03	S	S	<=	0.03	S	<=	0.06	S	<=	0.06	S	S	<=	0.5	S	S	<=	0.5	S	neg	=	0.06	S	=	0.06	S	<=	1	S	<=	2	S	neg	neg
20153199	73	>65	SAMN05221223	56	87811	218352	2106720	15C	1	3280	7	8	9	=	0.25	R	S	=	0.5	S	=	0.12	S	=	0.12	S	S	<=	0.5	S	S	<=	0.5	S	MEF	=	8	R	=	0.06	S	<=	1	S	<=	2	S	neg	FOLP_177-ins:FOLP_180-ins
20153200	54	19to64	SAMN05221224	52	66484	193340	2041226	22F	neg	433	1	2	2	<=	0.03	S	S	<=	0.03	S	<=	0.06	S	<=	0.06	S	S	<=	0.5	S	S	<=	0.5	S	neg	=	0.06	S	=	0.06	S	<=	1	S	<=	2	S	neg	neg
20153201	54	19to64	SAMN05221225	75	62338	243633	2031421	12F	neg	218	0	0	0	<=	0.03	S	S	<=	0.03	S	<=	0.06	S	<=	0.06	S	S	<=	0.5	S	S	<=	0.5	S	MEF	=	8	R	=	0.06	S	<=	1	S	<=	2	S	neg	neg
20153202	49	19to64	SAMN05221226	80	60600	193412	2067424	20	neg	235	1	4	2	<=	0.03	S	S	<=	0.03	S	<=	0.06	S	<=	0.06	S	S	<=	0.5	S	S	<=	0.5	S	neg	=	0.06	S	=	0.06	S	<=	1	S	<=	2	S	neg	neg
20153203	59	19to64	SAMN05221227	45	93297	301724	2021426	4	neg	10172	1	0	0	<=	0.03	S	S	<=	0.03	S	<=	0.06	S	<=	0.06	S	S	<=	0.5	S	S	<=	0.5	S	neg	=	0.06	S	=	0.06	S	<=	1	S	<=	2	S	neg	FOLP_178-ins
20153204	48	19to64	SAMN05221228	59	119927	351878	2131732	21	neg	432	0	0	2	<=	0.03	S	S	<=	0.03	S	<=	0.06	S	<=	0.06	S	S	<=	0.5	S	S	<=	0.5	S	neg	=	0.06	S	=	0.06	S	<=	1	S	<=	2	S	neg	neg
20153205	53	19to64	SAMN05221229	53	126745	216440	1986582	3	neg	180	2	0	2	<=	0.03	S	S	<=	0.03	S	<=	0.06	S	<=	0.06	S	S	<=	0.5	S	S	<=	0.5	S	neg	=	0.06	S	=	0.06	S	<=	1	S	<=	2	S	neg	neg
20153206	52	19to64	SAMN05221230	61	69265	185639	2020833	35B	1	558	4	7	7	=	2	R	S	=	4	I	=	0.5	I	=	1	I	S	=	1	I	S	>	2	R	neg	=	0.06	S	=	0.06	S	<=	1	S	<=	2	S	neg	neg
20153207	83	>65	SAMN05221231	53	82694	200535	1987177	3	neg	180	2	0	2	<=	0.03	S	S	<=	0.03	S	<=	0.06	S	<=	0.06	S	S	<=	0.5	S	S	<=	0.5	S	neg	=	0.06	S	=	0.06	S	<=	1	S	<=	2	S	neg	neg
20153208	59	19to64	SAMN05221232	56	86692	143563	2074463	35F	neg	498	0	0	3	<=	0.03	S	S	<=	0.03	S	<=	0.06	S	<=	0.06	S	S	<=	0.5	S	S	<=	0.5	S	neg	=	0.06	S	=	0.06	S	<=	1	S	<=	2	S	neg	neg
20153209	84	>65	SAMN05221233	56	108162	300004	2143399	23B	neg	1847	0	0	0	<=	0.03	S	S	<=	0.03	S	<=	0.06	S	<=	0.06	S	S	<=	0.5	S	S	<=	0.5	S	R23S1-C9T	=	0.06	S	=	0.06	S	<=	1	S	<=	2	S	neg	neg
20153210	4	0-4	SAMN05221234	31	119021	197579	1997763	8	neg	1480	3	5	5	<=	0.03	S	S	<=	0.03	S	<=	0.06	S	<=	0.06	S	S	<=	0.5	S	S	<=	0.5	S	neg	=	0.06	S	=	0.06	S	<=	1	S	<=	2	S	neg	neg
20153211	41	19to64	SAMN05221235	57	69321	143933	2074774	22F	neg	433	1	2	2	<=	0.03	S	S	<=	0.03	S	<=	0.06	S	<=	0.06	S	S	<=	0.5	S	S	<=	0.5	S	neg	=	0.06	S	=	0.06	S	<=	1	S	<=	2	S	neg	neg
20153212	48	19to64	SAMN05221236	71	64030	179098	2084143	16F	neg	1840	0	10	2	<=	0.03	S	S	<=	0.03	S	<=	0.06	S	<=	0.06	S	S	<=	0.5	S	S	<=	0.5	S	neg	=	0.06	S	=	0.06	S	<=	1	S	<=	2	S	neg	neg
20153213	70	>65	SAMN05221237	55	92086	217896	2086496	22F	neg	433	1	2	2	<=	0.03	S	S	<=	0.03	S	<=	0.06	S	<=	0.06	S	S	<=	0.5	S	S	<=	0.5	S	neg	=	0.06	S	=	0.06	S	<=	1	S	<=	2	S	neg	neg
20153214	77	>65	SAMN05221238	69	77097	219849	2099064	9N	neg	1257	1	4	2	<=	0.03	S	S	<=	0.03	S	<=	0.06	S	<=	0.06	S	S	<=	0.5	S	S	<=	0.5	S	neg	=	0.06	S	=	0.06	S	<=	1	S	<=	2	S	neg	neg
20153215	43	19to64	SAMN05221239	56	102259	257062	2024924	7F	neg	2331	2	0	2	<=	0.03	S	S	<=	0.03	S	<=	0.06	S	<=	0.06	S	S	<=	0.5	S	S	<=	0.5	S	neg	=	0.06	S	=	0.06	S	<=	1	S	<=	2	S	neg	neg
20153216	54	19to64	SAMN05221240	73	69468	166131	2115332	19F	2	1258	2	78	3	<=	0.03	S	S	<=	0.03	S	<=	0.06	S	<=	0.06	S	S	<=	0.5	S	S	<=	0.5	S	neg	=	0.06	S	=	0.06	S	<=	1	S	<=	2	S	neg	neg
20153217	68	>65	SAMN05221241	42	188105	282433	1984843	3	neg	180	2	0	2	<=	0.03	S	S	<=	0.03	S	<=	0.06	S	<=	0.06	S	S	<=	0.5	S	S	<=	0.5	S	neg	=	0.06	S	=	0.06	S	<=	1	S	<=	2	S	neg	neg
20153218	59	19to64	SAMN05221242	117	38269	93308	2129401	10A	neg	816	0	0	2	<=	0.03	S	S	<=	0.03	S	<=	0.06	S	<=	0.06	S	S	<=	0.5	S	S	<=	0.5	S	MEF	=	8	R	=	0.06	S	<=	1	S	<=	2	S	neg	neg
20153219	0	0-4	SAMN05221243	49	102183	298523	2061550	22F	neg	7314	1	2	2	<=	0.03	S	S	<=	0.03	S	<=	0.06	S	<=	0.06	S	S	<=	0.5	S	S	<=	0.5	S	MEF	=	8	R	=	0.06	S	<=	1	S	<=	2	S	neg	neg
20153220	0	0-4	SAMN05221244	60	93840	270029	2030992	11A	neg	62	2	6	0	<=	0.03	S	S	<=	0.03	S	<=	0.06	S	<=	0.06	S	S	<=	0.5	S	S	<=	0.5	S	MEF	=	8	R	=	0.06	S	<=	1	S	<=	2	S	neg	neg
20153221	57	19to64	SAMN05221245	73	71217	121409	2021810	12F	neg	218	0	0	0	<=	0.03	S	S	<=	0.03	S	<=	0.06	S	<=	0.06	S	S	<=	0.5	S	S	<=	0.5	S	MEF	=	8	R	=	0.06	S	<=	1	S	<=	2	S	neg	neg
20153222	53	19to64	SAMN05221246	61	71205	191400	2018211	12F	neg	218	0	0	0	<=	0.03	S	S	<=	0.03	S	<=	0.06	S	<=	0.06	S	S	<=	0.5	S	S	<=	0.5	S	MEF	=	8	R	=	0.06	S	<=	1	S	<=	2	S	neg	neg
20153223	49	19to64	SAMN05221247	45	196810	310864	1983721	3	neg	180	2	0	2	<=	0.03	S	S	<=	0.03	S	<=	0.06	S	<=	0.06	S	S	<=	0.5	S	S	<=	0.5	S	neg	=	0.06	S	=	0.06	S	<=	1	S	<=	2	S	neg	neg
20153224	30	19to64	SAMN05221248	110	50660	134526	2116601	7C	neg	1797	2	4	6	<=	0.03	S	S	<=	0.03	S	<=	0.06	S	<=	0.06	S	S	<=	0.5	S	S	<=	0.5	S	neg	=	0.06	S	=	0.06	S	<=	1	S	<=	2	S	neg	neg
20153225	0	0-4	SAMN05221249	30	191558	289047	1975817	3	neg	180	2	0	2	<=	0.03	S	S	<=	0.03	S	<=	0.06	S	<=	0.06	S	S	<=	0.5	S	S	<=	0.5	S	neg	=	0.06	S	=	0.06	S	<=	1	S	<=	2	S	neg	neg
20153226	67	>65	SAMN05221250	100	61664	122095	2103296	7C	neg	1797	2	4	6	<=	0.03	S	S	<=	0.03	S	<=	0.06	S	<=	0.06	S	S	<=	0.5	S	S	<=	0.5	S	neg	=	0.06	S	=	0.06	S	<=	1	S	<=	2	S	neg	neg
20153227	79	>65	SAMN05221251	54	83346	252520	2073119	23A	neg	338	0	1	1	=	0.25	R	S	=	0.06	S	<=	0.06	S	=	0.12	S	S	<=	0.5	S	S	<=	0.5	S	neg	=	0.06	S	=	0.06	S	<=	1	S	<=	2	S	neg	FOLA-I20L
20153228	29	19to64	SAMN05221252	48	93854	217085	2035241	3	neg	180	2	0	2	<=	0.03	S	S	<=	0.03	S	<=	0.06	S	<=	0.06	S	S	<=	0.5	S	S	<=	0.5	S	neg	=	0.06	S	=	0.06	S	<=	1	S	<=	2	S	neg	neg
20153229	39	19to64	SAMN05221253	44	98534	202262	2066044	35B	1	11254	4	7	7	=	2	R	S	=	4	I	=	0.5	I	=	1	I	S	=	1	I	S	>	2	R	neg	=	0.06	S	=	0.06	S	<=	1	S	<=	2	S	neg	FOLA-Q1Y,I20L:FOLP_169-ins
20153230	56	19to64	SAMN05221254	32	199079	405739	2001227	8	neg	11255	3	5	5	<=	0.03	S	S	<=	0.03	S	<=	0.06	S	<=	0.06	S	S	<=	0.5	S	S	<=	0.5	S	neg	=	0.06	S	=	0.06	S	<=	1	S	<=	2	S	neg	neg
20153231	69	>65	SAMN05221255	33	150406	215245	1984523	3	neg	180	2	0	2	<=	0.03	S	S	<=	0.03	S	<=	0.06	S	<=	0.06	S	S	<=	0.5	S	S	<=	0.5	S	neg	=	0.06	S	=	0.06	S	<=	1	S	<=	2	S	neg	neg
20153232	48	19to64	SAMN05221256	69	79004	172272	2016764	12F	neg	218	0	0	0	<=	0.03	S	S	<=	0.03	S	<=	0.06	S	<=	0.06	S	S	<=	0.5	S	S	<=	0.5	S	MEF	=	8	R	=	0.06	S	<=	1	S	<=	2	S	neg	neg
20153233	60	19to64	SAMN05221257	75	74715	126869	2080392	10A	neg	816	0	0	2	<=	0.03	S	S	<=	0.03	S	<=	0.06	S	<=	0.06	S	S	<=	0.5	S	S	<=	0.5	S	neg	=	0.06	S	=	0.06	S	<=	1	S	<=	2	S	neg	neg
20153234	46	19to64	SAMN05221258	78	49820	157380	2057892	12F	neg	218	0	0	0	<=	0.03	S	S	<=	0.03	S	<=	0.06	S	<=	0.06	S	S	<=	0.5	S	S	<=	0.5	S	MEF	=	8	R	=	0.06	S	<=	1	S	<=	2	S	neg	neg
20153235	67	>65	SAMN05221259	46	106549	224247	2088087	11A	neg	62	2	6	10	<=	0.03	S	S	<=	0.03	S	<=	0.06	S	<=	0.06	S	S	<=	0.5	S	S	<=	0.5	S	neg	=	0.06	S	=	0.06	S	<=	1	S	<=	2	S	neg	neg
20153236	37	19to64	SAMN05221260	100	46091	96101	2099474	19F	neg	insufficient quality	2	4	0	<=	0.03	S	S	<=	0.03	S	<=	0.06	S	<=	0.06	S	S	<=	0.5	S	S	<=	0.5	S	neg	=	0.06	S	=	0.06	S	<=	1	S	<=	2	S	neg	neg
20153237	50	19to64	SAMN05221261	90	53809	174263	2017331	7F	2	191	2	0	2	<=	0.03	S	S	<=	0.03	S	<=	0.06	S	<=	0.06	S	S	<=	0.5	S	S	<=	0.5	S	neg	=	0.06	S	=	0.06	S	<=	1	S	<=	2	S	neg	neg
20153238	39	19to64	SAMN05221262	106	128805	308935	1994927	3	neg	180	70	3	2	<=	0.03	S	S	<=	0.03	S	<=	0.06	S	<=	0.06	S	S	<=	0.5	S	S	<=	0.5	S	neg	=	0.06	S	=	0.06	S	<=	1	S	<=	2	S	neg	neg
20153239	54	19to64	SAMN05221263	50	66960	217378	2072106	22F	neg	433	1	2	2	<=	0.03	S	S	<=	0.03	S	<=	0.06	S	<=	0.06	S	S	<=	0.5	S	S	<=	0.5	S	neg	=	0.06	S	=	0.06	S	<=	1	S	<=	2	S	neg	neg
20153240	78	>65	SAMN05221264	59	73197	196218	2075938	23A	neg	42	2	0	6	<=	0.03	S	S	<=	0.03	S	<=	0.06	S	<=	0.06	S	S	<=	0.5	S	S	<=	0.5	S	neg	=	0.06	S	=	0.06	S	<=	1	S	<=	2	S	neg	neg
20153241	29	19to64	SAMN05221265	73	69535	206636	2071445	19A	neg	4693	0	29	11	=	0.12	R	S	=	0.12	S	<=	0.06	S	<=	0.06	S	S	<=	0.5	S	S	<=	0.5	S	neg	=	0.06	S	=	0.06	S	<=	1	S	<=	2	S	neg	neg
20153242	90	>65	SAMN05221266	101	36380	117844	2037708	31	neg	11256	12	0	0	<=	0.03	S	S	<=	0.03	S	<=	0.06	S	<=	0.06	S	S	<=	0.5	S	S	<=	0.5	S	neg	=	0.06	S	=	0.06	S	<=	1	S	<=	2	S	neg	neg
20153244	54	19to64	SAMN05221267	108	39570	125041	2063512	22F	neg	7314	1	2	2	<=	0.03	S	S	<=	0.03	S	<=	0.06	S	<=	0.06	S	S	<=	0.5	S	S	<=	0.5	S	MEF	=	8	R	=	0.06	S	<=	1	S	<=	2	S	neg	neg
20153245	86	>65	SAMN05221268	46	100359	220993	2043415	35B	1	558	4	7	7	=	2	R	S	=	4	I	=	0.5	I	=	1	I	S	=	1	I	S	>	2	R	MEF	=	8	R	=	0.06	S	<=	1	S	<=	2	S	neg	neg
20153246	84	>65	SAMN05221269	73	79098	188168	2122309	23B	neg	4334	0	2	0	<=	0.03	S	S	<=	0.03	S	<=	0.06	S	<=	0.06	S	S	<=	0.5	S	S	<=	0.5	S	neg	=	0.06	S	=	0.06	S	<=	1	S	<=	2	S	neg	neg
20153247	1	0-4	SAMN05221270	119	37907	199716	2169967	19A	1	695	8	0	11	=	0.12	R	S	=	0.06	S	<=	0.06	S	<=	0.06	S	S	<=	0.5	S	S	<=	0.5	S	neg	=	0.06	S	=	0.06	S	<=	1	S	<=	2	S	neg	neg
20153248	61	19to64	SAMN05221271	108	36237	103318	2144860	22F	neg	433	1	2	2	<=	0.03	S	S	<=	0.03	S	<=	0.06	S	<=	0.06	S	S	<=	0.5	S	S	<=	0.5	S	neg	=	0.06	S	=	0.06	S	<=	1	S	<=	2	S	neg	neg
20153249	87	>65	SAMN05221272	90	53655	149892	2166225	23A	neg	338	19	1	NF	=	0.5	R	S	=	0.12	S	<=	0.06	S	=	0.25	S	S	=	0.25	S	S	<=	0.5	S	ERMB	>	32	R	>	2	R	<=	1	S	<=	2	S	pos	neg
20153250	73	>65	SAMN05221273	81	51639	103126	2087347	22F	neg	433	1	2	2	<=	0.03	S	S	<=	0.03	S	<=	0.06	S	<=	0.06	S	S	<=	0.5	S	S	<=	0.5	S	neg	=	0.06	S	=	0.06	S	<=	1	S	<=	2	S	neg	neg
20153251	78	>65	SAMN05221274	72	61933	199182	2115379	34	neg	547	0	0	2	<=	0.03	S	S	<=	0.03	S	<=	0.06	S	<=	0.06	S	S	<=	0.5	S	S	<=	0.5	S	neg	=	0.06	S	=	0.06	S	<=	1	S	<=	2	S	neg	neg
20153252	14	5to18	SAMN05221275	35	150821	248456	2017155	3	neg	11257	2	3	2	<=	0.03	S	S	<=	0.03	S	<=	0.06	S	<=	0.06	S	S	<=	0.5	S	S	<=	0.5	S	neg	=	0.06	S	=	0.06	S	<=	1	S	<=	2	S	neg	neg
20153253	88	>65	SAMN05221276	69	61579	245909	2077107	22F	neg	433	1	2	59	<=	0.03	S	S	<=	0.03	S	<=	0.06	S	<=	0.06	S	S	<=	0.5	S	S	<=	0.5	S	MEF	=	8	R	=	0.06	S	<=	1	S	<=	2	S	neg	neg
20153254	66	>65	SAMN05221277	75	56530	284406	2058407	22F	neg	7314	1	2	2	<=	0.03	S	S	<=	0.03	S	<=	0.06	S	<=	0.06	S	S	<=	0.5	S	S	<=	0.5	S	MEF	=	8	R	=	0.06	S	<=	1	S	<=	2	S	neg	neg
20153255	66	>65	SAMN09224715	82	53351	126272	2063034	19A	1	4475	13	11	36	=	4	R	I	=	8	R	=	1	R	=	1	I	S	=	1	I	S	>	2	R	ERMB:MEF	>	32	R	>	2	R	<=	1	S	<=	2	S	pos	FOLA-Q1Y,Q11H,E14D,I20L:FOLP_195-ins
20153256	82	>65	SAMN05221278	61	59862	224862	2024090	11A	2	62	2	6	0	<=	0.03	S	S	<=	0.03	S	<=	0.06	S	<=	0.06	S	S	<=	0.5	S	S	<=	0.5	S	neg	=	0.06	S	=	0.06	S	<=	1	S	<=	2	S	neg	neg
20153257	67	>65	SAMN05221279	114	45037	174256	2098088	9N	neg	1257	1	4	2	<=	0.03	S	S	<=	0.03	S	<=	0.06	S	<=	0.06	S	S	<=	0.5	S	S	<=	0.5	S	neg	=	0.06	S	=	0.06	S	<=	1	S	<=	2	S	neg	neg
20153258	63	19to64	SAMN05221280	97	41613	120167	2084555	22F	neg	433	1	2	137	<=	0.03	S	S	<=	0.03	S	<=	0.06	S	=	0.12	S	S	<=	0.5	S	S	=	1	I	neg	=	0.06	S	=	0.06	S	<=	1	S	<=	2	S	neg	neg
20153259	41	19to64	SAMN05221281	80	50349	98768	2061851	33F	neg	100	2	0	6	<=	0.03	S	S	<=	0.03	S	<=	0.06	S	<=	0.06	S	S	<=	0.5	S	S	<=	0.5	S	MEF	=	8	R	=	0.06	S	<=	1	S	<=	2	S	neg	FOLP_189-ins
20153260	64	19to64	SAMN05221282	45	120735	206781	2060649	19A	neg	8197	17	1	22	=	1	R	S	=	0.06	S	<=	0.06	S	=	0.25	S	S	<=	0.5	S	S	<=	0.5	S	neg	=	0.06	S	=	0.06	S	<=	1	S	<=	2	S	neg	FOLP_176-ins
20153261	58	19to64	SAMN05221283	44	216581	484684	2125671	23A	neg	10469	71	1	24	=	0.25	R	S	=	0.12	S	<=	0.06	S	=	0.25	S	S	<=	0.5	S	S	<=	0.5	S	ERMB	>	32	R	>	2	R	<=	1	S	<=	2	S	pos	neg
20153262	67	>65	SAMN05221284	62	81264	270968	2080619	9N	neg	66	1	0	0	<=	0.03	S	S	<=	0.03	S	<=	0.06	S	<=	0.06	S	S	<=	0.5	S	S	<=	0.5	S	neg	=	0.06	S	=	0.06	S	<=	1	S	<=	2	S	neg	neg
20153263	54	19to64	SAMN05221285	51	119634	323357	2095127	9N	neg	1257	1	4	2	<=	0.03	S	S	<=	0.03	S	<=	0.06	S	<=	0.06	S	S	<=	0.5	S	S	<=	0.5	S	neg	=	0.06	S	=	0.06	S	<=	1	S	<=	2	S	neg	neg
20153264	80	>65	SAMN05221286	30	195563	671068	1994512	8	neg	1480	3	5	5	<=	0.03	S	S	<=	0.03	S	<=	0.06	S	<=	0.06	S	S	<=	0.5	S	S	<=	0.5	S	neg	=	0.06	S	=	0.06	S	<=	1	S	<=	2	S	neg	neg
20153265	66	>65	SAMN05221287	39	161378	273865	1987555	12F	neg	220	0	80	17	<=	0.03	S	S	<=	0.03	S	<=	0.06	S	<=	0.06	S	S	<=	0.5	S	S	<=	0.5	S	neg	=	0.06	S	=	0.06	S	<=	1	S	<=	2	S	neg	neg
20153266	63	19to64	SAMN05221288	47	121458	379625	2049655	19A	1:2	320	13	11	16	=	4	R	I	=	8	R	=	1	R	=	2	R	I	=	2	R	I	>	2	R	ERMB:MEF	>	32	R	>	2	R	<=	1	S	<=	2	S	pos	FOLA-Q1Y,Q11H,E14D,I20L:FOLP_195-ins
20153267	71	>65	SAMN05221289	50	169522	266507	2141912	9N	neg	11258	2	0	0	<=	0.03	S	S	<=	0.03	S	<=	0.06	S	<=	0.06	S	S	<=	0.5	S	S	<=	0.5	S	neg	=	0.06	S	=	0.06	S	<=	1	S	<=	2	S	neg	neg
20153268	79	>65	SAMN05221290	33	120648	306202	2021858	35B	1	558	4	7	112	=	1	R	S	=	2	S	=	0.5	I	=	1	I	S	=	1	I	S	>	2	R	MEF	=	8	R	=	0.06	S	<=	1	S	<=	2	S	neg	neg
20153269	62	19to64	SAMN05221291	71	66690	183708	2143898	4	1	205	0	0	3	<=	0.03	S	S	<=	0.03	S	<=	0.06	S	<=	0.06	S	S	<=	0.5	S	S	<=	0.5	S	neg	=	0.06	S	=	0.06	S	<=	1	S	<=	2	S	neg	neg
20153270	92	>65	SAMN05221292	26	308313	494222	1992920	3	neg	180	2	3	2	<=	0.03	S	S	<=	0.03	S	<=	0.06	S	<=	0.06	S	S	<=	0.5	S	S	<=	0.5	S	neg	=	0.06	S	=	0.06	S	<=	1	S	<=	2	S	neg	neg
20153271	25	19to64	SAMN05221293	19	274095	489859	2017642	3	neg	180	2	3	2	<=	0.03	S	S	<=	0.03	S	<=	0.06	S	<=	0.06	S	S	<=	0.5	S	S	<=	0.5	S	neg	=	0.06	S	=	0.06	S	<=	1	S	<=	2	S	neg	neg
20153272	34	19to64	SAMN05221294	62	70775	166340	2195126	6C	1	1092	6	7	8	=	0.5	R	S	=	1	S	=	0.25	S	=	0.5	S	S	<=	0.5	S	S	=	2	R	neg	=	0.06	S	=	0.06	S	<=	1	S	<=	2	S	neg	FOLA-Q1H,V3I,E14D,I20L:FOLP_195-ins
20153273	54	19to64	SAMN05221295	48	111915	317073	2061752	22F	neg	7314	1	2	2	<=	0.03	S	S	<=	0.03	S	<=	0.06	S	<=	0.06	S	S	<=	0.5	S	S	<=	0.5	S	MEF	=	8	R	=	0.06	S	<=	1	S	<=	2	S	neg	neg
20153274	46	19to64	SAMN05221296	69	66573	174955	2014144	7F	2	191	2	0	2	<=	0.03	S	S	<=	0.03	S	<=	0.06	S	<=	0.06	S	S	<=	0.5	S	S	<=	0.5	S	neg	=	0.06	S	=	0.06	S	<=	1	S	<=	2	S	neg	neg
20153275	47	19to64	SAMN05221297	37	137993	296912	2062173	16F	neg	659	9	0	3	<=	0.03	S	S	<=	0.03	S	<=	0.06	S	<=	0.06	S	S	<=	0.5	S	S	<=	0.5	S	neg	=	0.06	S	=	0.06	S	<=	1	S	<=	2	S	neg	neg
20153276	36	19to64	SAMN05221298	45	94327	265954	1988870	12F	neg	220	0	0	17	<=	0.03	S	S	<=	0.03	S	<=	0.06	S	<=	0.06	S	S	<=	0.5	S	S	<=	0.5	S	neg	=	0.06	S	=	0.06	S	<=	1	S	<=	2	S	neg	neg
20153277	56	19to64	SAMN05221299	50	94022	383718	2021170	12F	neg	218	0	0	0	<=	0.03	S	S	<=	0.03	S	<=	0.06	S	<=	0.06	S	S	<=	0.5	S	S	<=	0.5	S	MEF	=	8	R	=	0.06	S	<=	1	S	<=	2	S	neg	neg
20153278	62	19to64	SAMN05221300	188	73686	255934	2125159	17F	neg	392	11	0	134	<=	0.03	S	S	<=	0.03	S	<=	0.06	S	<=	0.06	S	S	<=	0.5	S	S	<=	0.5	S	neg	=	0.06	S	=	0.06	S	<=	1	S	<=	2	S	neg	neg
20153279	35	19to64	SAMN05221301	54	67040	249020	2016161	11A	2	62	2	6	0	<=	0.03	S	S	<=	0.03	S	<=	0.06	S	<=	0.06	S	S	<=	0.5	S	S	<=	0.5	S	neg	=	0.06	S	=	0.06	S	<=	1	S	<=	2	S	neg	neg
20153280	67	>65	SAMN05221302	46	121888	203127	2096359	20	neg	1030	1	79	2	<=	0.03	S	S	<=	0.03	S	<=	0.06	S	<=	0.06	S	S	<=	0.5	S	S	<=	0.5	S	neg	=	0.06	S	=	0.06	S	<=	1	S	<=	2	S	neg	neg
20153281	49	19to64	SAMN05221303	44	107735	355492	2114880	34	neg	547	0	0	2	<=	0.03	S	S	<=	0.03	S	<=	0.06	S	<=	0.06	S	S	<=	0.5	S	S	<=	0.5	S	neg	=	0.06	S	=	0.06	S	<=	1	S	<=	2	S	neg	neg
20153282	82	>65	SAMN05221304	54	71985	213168	2069322	22F	neg	433	1	2	2	<=	0.03	S	S	<=	0.03	S	<=	0.06	S	<=	0.06	S	S	<=	0.5	S	S	<=	0.5	S	neg	=	0.06	S	=	0.06	S	<=	1	S	<=	2	S	neg	neg
20153283	82	>65	SAMN05221305	116	99170	210086	2002019	8	neg	1480	3	5	5	<=	0.03	S	S	<=	0.03	S	<=	0.06	S	<=	0.06	S	S	<=	0.5	S	S	<=	0.5	S	neg	=	0.06	S	=	0.06	S	<=	1	S	<=	2	S	neg	neg
20153284	61	19to64	SAMN05221306	22	220533	394389	2076046	6C	neg	10471	2	0	6	<=	0.03	S	S	<=	0.03	S	<=	0.06	S	<=	0.06	S	S	<=	0.5	S	S	<=	0.5	S	MEF	=	8	R	=	0.06	S	<=	1	S	<=	2	S	neg	FOLP_189-ins
20153285	55	19to64	SAMN05221307	48	120563	325666	2092967	9N	neg	1257	1	4	2	<=	0.03	S	S	<=	0.03	S	<=	0.06	S	<=	0.06	S	S	<=	0.5	S	S	<=	0.5	S	neg	=	0.06	S	=	0.06	S	<=	1	S	<=	2	S	neg	neg
20153286	64	19to64	SAMN05221308	19	377353	528836	2064101	33F	neg	2705	2	0	6	<=	0.03	S	S	<=	0.03	S	<=	0.06	S	<=	0.06	S	S	<=	0.5	S	S	<=	0.5	S	MEF	=	8	R	=	0.06	S	<=	1	S	<=	2	S	neg	FOLP_189-ins
20153287	69	>65	SAMN05221309	40	161156	190905	1992106	12F	neg	220	0	0	17	<=	0.03	S	S	<=	0.03	S	<=	0.06	S	<=	0.06	S	S	<=	0.5	S	S	<=	0.5	S	neg	=	0.06	S	=	0.06	S	<=	1	S	<=	2	S	neg	neg
20153288	57	19to64	SAMN05221310	22	441658	616519	2016852	3	neg	180	2	3	2	<=	0.03	S	S	<=	0.03	S	<=	0.06	S	<=	0.06	S	S	<=	0.5	S	S	<=	0.5	S	neg	=	0.06	S	=	0.06	S	<=	1	S	<=	2	S	neg	neg
20153289	57	19to64	SAMN05221311	42	173412	315696	2138244	6C	1	1092	15	7	8	=	2	R	S	=	2	S	=	0.5	I	=	1	I	S	<=	0.5	S	S	>	2	R	neg	=	0.06	S	=	0.06	S	<=	1	S	<=	2	S	neg	FOLA-Q1H,V3I,E14D,I20L:FOLP_195-ins
20153290	89	>65	SAMN05221312	80	52803	127381	2034710	31	neg	8289	12	0	0	<=	0.03	S	S	<=	0.03	S	<=	0.06	S	<=	0.06	S	S	<=	0.5	S	S	<=	0.5	S	neg	=	0.06	S	=	0.06	S	<=	1	S	<=	2	S	neg	neg
20153291	58	19to64	SAMN05221313	59	94073	194226	2102049	20	neg	1030	1	44	2	<=	0.03	S	S	<=	0.03	S	<=	0.06	S	<=	0.06	S	S	<=	0.5	S	S	<=	0.5	S	neg	=	0.06	S	=	0.06	S	<=	1	S	<=	2	S	neg	neg
20153292	62	19to64	SAMN05221314	81	63105	140686	2113903	34	neg	547	0	0	2	<=	0.03	S	S	<=	0.03	S	<=	0.06	S	<=	0.06	S	S	<=	0.5	S	S	<=	0.5	S	neg	=	0.06	S	=	0.06	S	<=	1	S	<=	2	S	neg	neg
20153293	49	19to64	SAMN05221315	31	127438	260091	2071982	33F	neg	2705	2	0	6	<=	0.03	S	S	<=	0.03	S	<=	0.06	S	<=	0.06	S	S	<=	0.5	S	S	<=	0.5	S	MEF	=	8	R	=	0.06	S	<=	1	S	<=	2	S	neg	FOLP_189-ins
20153294	77	>65	SAMN05221316	54	105787	325371	2057692	11A	2	62	2	6	0	<=	0.03	S	S	<=	0.03	S	<=	0.06	S	<=	0.06	S	S	<=	0.5	S	S	<=	0.5	S	neg	=	0.06	S	=	0.06	S	<=	1	S	<=	2	S	neg	neg
20153295	56	19to64	SAMN05221317	42	115070	280017	2047939	11A	2	62	2	6	0	<=	0.03	S	S	<=	0.03	S	<=	0.06	S	<=	0.06	S	S	<=	0.5	S	S	<=	0.5	S	neg	=	0.06	S	=	0.06	S	<=	1	S	<=	2	S	neg	neg
20153296	45	19to64	SAMN05221318	45	108257	225347	2061378	19A	neg	8197	17	1	22	=	1	R	S	=	0.06	S	<=	0.06	S	=	0.25	S	S	<=	0.5	S	S	<=	0.5	S	neg	=	0.06	S	=	0.06	S	<=	1	S	<=	2	S	neg	FOLP_176-ins
20153297	3	0-4	SAMN05221319	87	51626	110177	2031760	31	neg	568	73	0	0	<=	0.03	S	S	<=	0.03	S	<=	0.06	S	<=	0.06	S	S	<=	0.5	S	S	<=	0.5	S	neg	=	0.06	S	=	0.06	S	<=	1	S	<=	2	S	neg	neg
20153298	66	>65	SAMN05221320	34	167286	262150	2049973	3	neg	180	2	0	111	=	0.06	S	S	=	0.06	S	<=	0.06	S	=	0.25	S	S	<=	0.5	S	S	=	1	I	ERMB	>	32	R	>	2	R	<=	1	S	<=	2	S	pos	neg
20153299	60	19to64	SAMN05221321	47	129055	261238	2069181	22F	neg	433	72	2	136	<=	0.03	S	S	<=	0.03	S	<=	0.06	S	<=	0.06	S	S	<=	0.5	S	S	<=	0.5	S	neg	=	0.06	S	=	0.06	S	<=	1	S	<=	2	S	neg	neg
20153300	83	>65	SAMN05221322	126	95760	203726	2104026	15C	1	3280	7	8	9	=	0.25	R	S	=	0.5	S	=	0.12	S	=	0.12	S	S	<=	0.5	S	S	<=	0.5	S	MEF	=	8	R	=	0.06	S	<=	1	S	<=	2	S	neg	FOLP_180-ins
20153301	31	19to64	SAMN05221323	59	123298	332309	2097584	20	neg	1257	1	4	2	<=	0.03	S	S	<=	0.03	S	<=	0.06	S	<=	0.06	S	S	<=	0.5	S	S	<=	0.5	S	neg	=	0.06	S	=	0.06	S	<=	1	S	<=	2	S	neg	neg
20153302	76	>65	SAMN05221324	55	132159	408933	2099640	20	neg	235	1	4	2	<=	0.03	S	S	<=	0.03	S	<=	0.06	S	<=	0.06	S	S	<=	0.5	S	S	<=	0.5	S	neg	=	0.06	S	=	0.06	S	<=	1	S	<=	2	S	neg	neg
20153304	39	19to64	SAMN05221325	51	109426	265383	2126174	17F	neg	392	11	0	0	<=	0.03	S	S	<=	0.03	S	<=	0.06	S	<=	0.06	S	S	<=	0.5	S	S	<=	0.5	S	neg	=	0.06	S	=	0.06	S	<=	1	S	<=	2	S	neg	neg
20153305	63	19to64	SAMN05221326	79	84197	185932	2152279	19F	2	654	2	0	0	<=	0.03	S	S	<=	0.03	S	<=	0.06	S	<=	0.06	S	S	<=	0.5	S	S	<=	0.5	S	neg	=	0.06	S	=	0.06	S	<=	1	S	<=	2	S	neg	neg
20153306	51	19to64	SAMN05221327	108	64973	225889	2151359	11A	2	62	2	6	0	<=	0.03	S	S	<=	0.03	S	<=	0.06	S	<=	0.06	S	S	<=	0.5	S	S	<=	0.5	S	MEF	=	8	R	=	0.06	S	<=	1	S	<=	2	S	neg	neg
20153307	85	>65	SAMN05221328	103	64323	164529	2092990	7C	neg	1797	2	4	6	<=	0.03	S	S	<=	0.03	S	<=	0.06	S	<=	0.06	S	S	<=	0.5	S	S	<=	0.5	S	neg	=	0.06	S	=	0.06	S	<=	1	S	<=	2	S	neg	neg
20153308	93	>65	SAMN05221329	33	106844	341967	2016987	35B	1	558	4	7	7	=	2	R	S	=	4	I	=	0.5	I	=	1	I	S	=	1	I	S	>	2	R	MEF	=	8	R	=	0.06	S	<=	1	S	<=	2	S	neg	neg
20153309	53	19to64	SAMN05221330	60	68600	183184	2025634	31	neg	568	12	0	0	<=	0.03	S	S	<=	0.03	S	<=	0.06	S	<=	0.06	S	S	<=	0.5	S	S	<=	0.5	S	neg	=	0.06	S	=	0.06	S	<=	1	S	<=	2	S	neg	neg
20153310	39	19to64	SAMN05221331	38	129754	336240	2081257	23B	neg	439	0	0	0	<=	0.03	S	S	<=	0.03	S	<=	0.06	S	<=	0.06	S	S	<=	0.5	S	S	<=	0.5	S	neg	=	0.06	S	=	0.06	S	<=	1	S	<=	2	S	neg	neg
20153311	1	0-4	SAMN05221332	49	116628	331099	2091042	16F	neg	10475	0	6	2	<=	0.03	S	S	<=	0.03	S	<=	0.06	S	<=	0.06	S	S	<=	0.5	S	S	<=	0.5	S	neg	=	0.06	S	=	0.06	S	<=	1	S	<=	2	S	neg	FOLP_189-ins
20153312	41	19to64	SAMN05221333	29	185305	671971	2003895	8	neg	1480	3	5	5	<=	0.03	S	S	<=	0.03	S	<=	0.06	S	<=	0.06	S	S	<=	0.5	S	S	<=	0.5	S	neg	=	0.06	S	=	0.06	S	<=	1	S	<=	2	S	neg	neg
20153313	75	>65	SAMN05221334	34	192180	497362	2050066	3	neg	180	2	0	111	=	0.06	S	S	=	0.06	S	<=	0.06	S	=	0.25	S	S	<=	0.5	S	S	=	1	I	ERMB	>	32	R	>	2	R	<=	1	S	<=	2	S	pos	neg
20153314	52	19to64	SAMN05221335	44	125129	296806	2118303	23A	neg	338	0	1	1	=	0.25	R	S	=	0.06	S	<=	0.06	S	=	0.12	S	S	<=	0.5	S	S	<=	0.5	S	MEF	=	8	R	=	0.06	S	<=	1	S	<=	2	S	neg	neg
20153315	42	19to64	SAMN05221336	24	216450	383510	2050459	3	neg	180	2	0	2	<=	0.03	S	S	<=	0.03	S	<=	0.06	S	<=	0.06	S	S	<=	0.5	S	S	<=	0.5	S	ERMB:ERMBS:ERMBUP	=	0.06	S	=	0.06	S	<=	1	S	<=	2	S	neg	neg
20153392	41	19to64	SAMN05221337	27	438108	597311	2023101	3	neg	180	2	3	2	<=	0.03	S	S	<=	0.03	S	<=	0.06	S	<=	0.06	S	S	<=	0.5	S	S	<=	0.5	S	neg	=	0.06	S	=	0.06	S	<=	1	S	<=	2	S	neg	neg
20153394	63	19to64	SAMN05221338	77	71399	123897	2089273	35B	neg	452	0	0	0	<=	0.03	S	S	<=	0.03	S	<=	0.06	S	<=	0.06	S	S	<=	0.5	S	S	<=	0.5	S	neg	=	0.06	S	=	0.06	S	<=	1	S	<=	2	S	neg	neg
20153395	46	19to64	SAMN05221339	62	74867	204497	2126732	4	1	244	0	0	3	<=	0.03	S	S	<=	0.03	S	<=	0.06	S	<=	0.06	S	S	<=	0.5	S	S	<=	0.5	S	neg	=	0.06	S	=	0.06	S	<=	1	S	<=	2	S	neg	FOLA-Q11H,E14D,I20L:FOLP_178-ins
20153396	81	>65	SAMN05221340	27	234677	514675	2016671	3	neg	4389	12	0	2	<=	0.03	S	S	<=	0.03	S	<=	0.06	S	<=	0.06	S	S	<=	0.5	S	S	<=	0.5	S	neg	=	0.06	S	=	0.06	S	<=	1	S	<=	2	S	neg	neg
20153397	64	19to64	SAMN05221341	46	127287	300156	2162708	19A	neg	432	0	0	2	<=	0.03	S	S	<=	0.03	S	<=	0.06	S	<=	0.06	S	S	<=	0.5	S	S	<=	0.5	S	neg	=	0.06	S	=	0.06	S	<=	1	S	<=	2	S	neg	neg
20153398	37	19to64	SAMN05221342	34	152525	314555	1986756	12F	neg	220	0	0	2	<=	0.03	S	S	<=	0.03	S	<=	0.06	S	<=	0.06	S	S	<=	0.5	S	S	<=	0.5	S	neg	=	0.06	S	=	0.06	S	<=	1	S	<=	2	S	neg	neg
20153399	67	>65	SAMN05221343	56	146531	341551	2075352	16F	neg	570	0	6	2	<=	0.03	S	S	<=	0.03	S	<=	0.06	S	<=	0.06	S	S	<=	0.5	S	S	<=	0.5	S	neg	=	0.06	S	=	0.06	S	<=	1	S	<=	2	S	neg	neg
20153400	45	19to64	SAMN05221344	36	152509	265883	1986204	12F	neg	220	0	0	2	<=	0.03	S	S	<=	0.03	S	<=	0.06	S	<=	0.06	S	S	<=	0.5	S	S	<=	0.5	S	neg	=	0.06	S	=	0.06	S	<=	1	S	<=	2	S	neg	neg
20153401	46	19to64	SAMN05221345	40	123008	179631	2079621	20	neg	1030	1	44	2	<=	0.03	S	S	<=	0.03	S	<=	0.06	S	<=	0.06	S	S	<=	0.5	S	S	<=	0.5	S	neg	=	0.06	S	=	0.06	S	<=	1	S	<=	2	S	neg	neg
20153402	54	19to64	SAMN05221346	44	166577	345104	2075188	20	neg	1030	1	44	2	<=	0.03	S	S	<=	0.03	S	<=	0.06	S	<=	0.06	S	S	<=	0.5	S	S	<=	0.5	S	neg	=	0.06	S	=	0.06	S	<=	1	S	<=	2	S	neg	neg
20153403	28	19to64	SAMN05221347	40	147777	273620	2091017	11A	neg	8605	7	12	135	=	0.25	R	S	=	0.25	S	=	0.12	S	=	0.12	S	S	<=	0.5	S	S	<=	0.5	S	ERMB	>	32	R	>	2	R	<=	1	S	<=	2	S	pos	FOLA-I20L:FOLP_169-ins
20153404	25	19to64	SAMN05221348	72	59492	158654	2015727	7F	2	191	2	0	2	<=	0.03	S	S	<=	0.03	S	<=	0.06	S	<=	0.06	S	S	<=	0.5	S	S	<=	0.5	S	neg	=	0.06	S	=	0.06	S	<=	1	S	<=	2	S	neg	neg
20153405	3	0-4	SAMN05221349	33	200398	302882	1980119	3	neg	3599	2	0	2	<=	0.03	S	S	<=	0.03	S	<=	0.06	S	<=	0.06	S	S	<=	0.5	S	S	<=	0.5	S	neg	=	0.06	S	=	0.06	S	<=	1	S	<=	2	S	neg	neg
20153407	72	>65	SAMN05221351	57	90538	185778	2015496	31	neg	10479	12	2	0	<=	0.03	S	S	<=	0.03	S	<=	0.06	S	<=	0.06	S	S	<=	0.5	S	S	<=	0.5	S	neg	=	0.06	S	=	0.06	S	<=	1	S	<=	2	S	neg	neg
20153408	52	19to64	SAMN05221352	47	90578	179962	2017271	31	neg	10479	12	2	0	<=	0.03	S	S	<=	0.03	S	<=	0.06	S	<=	0.06	S	S	<=	0.5	S	S	<=	0.5	S	neg	=	0.06	S	=	0.06	S	<=	1	S	<=	2	S	neg	neg
20153409	0	0-4	SAMN05221353	65	100655	254251	2153080	9N	neg	66	1	0	0	<=	0.03	S	S	<=	0.03	S	<=	0.06	S	<=	0.06	S	S	<=	0.5	S	S	<=	0.5	S	neg	=	0.06	S	=	0.06	S	<=	1	S	<=	2	S	neg	neg
20153410	54	19to64	SAMN05221354	65	65455	186497	2021230	31	neg	10479	12	2	0	<=	0.03	S	S	<=	0.03	S	<=	0.06	S	<=	0.06	S	S	<=	0.5	S	S	<=	0.5	S	neg	=	0.06	S	=	0.06	S	<=	1	S	<=	2	S	neg	neg
20153411	54	19to64	SAMN05221355	31	227605	597242	2085783	10F	neg	32	12	82	2	<=	0.03	S	S	<=	0.03	S	<=	0.06	S	<=	0.06	S	S	<=	0.5	S	S	<=	0.5	S	neg	=	0.06	S	=	0.06	S	<=	1	S	<=	2	S	neg	neg
20153412	85	>65	SAMN05221356	33	187951	313729	1983905	3	neg	180	2	0	2	<=	0.03	S	S	<=	0.03	S	<=	0.06	S	<=	0.06	S	S	<=	0.5	S	S	<=	0.5	S	neg	=	0.06	S	=	0.06	S	<=	1	S	<=	2	S	neg	neg
20153413	45	19to64	SAMN05221357	71	69655	158622	2012098	7F	2	191	2	0	2	<=	0.03	S	S	<=	0.03	S	<=	0.06	S	<=	0.06	S	S	<=	0.5	S	S	<=	0.5	S	neg	=	0.06	S	=	0.06	S	<=	1	S	<=	2	S	neg	neg
20153414	66	>65	SAMN05221358	117	57769	171977	1998814	7F	2	191	2	0	2	<=	0.03	S	S	<=	0.03	S	<=	0.06	S	<=	0.06	S	S	<=	0.5	S	S	<=	0.5	S	neg	=	0.06	S	=	0.06	S	<=	1	S	<=	2	S	neg	neg
20153415	2	0-4	SAMN05221359	47	142412	312626	2127538	35F	neg	1635	0	0	3	<=	0.03	S	S	<=	0.03	S	<=	0.06	S	<=	0.06	S	S	<=	0.5	S	S	<=	0.5	S	neg	=	0.06	S	=	0.06	S	<=	1	S	<=	2	S	neg	neg
20153416	76	>65	SAMN05221360	81	129284	341761	2139143	38	neg	393	2	4	0	<=	0.03	S	S	<=	0.03	S	<=	0.06	S	<=	0.06	S	S	<=	0.5	S	S	<=	0.5	S	neg	=	0.06	S	=	0.06	S	<=	1	S	<=	2	S	neg	neg
20153417	3	0-4	SAMN05221361	91	75698	235633	2136664	38	neg	393	2	4	0	<=	0.03	S	S	<=	0.03	S	<=	0.06	S	<=	0.06	S	S	<=	0.5	S	S	<=	0.5	S	neg	=	0.06	S	=	0.06	S	<=	1	S	<=	2	S	neg	neg
20153418	1	0-4	SAMN05221362	84	122182	219852	2134898	38	neg	393	2	4	0	<=	0.03	S	S	<=	0.03	S	<=	0.06	S	<=	0.06	S	S	<=	0.5	S	S	<=	0.5	S	neg	=	0.06	S	=	0.06	S	<=	1	S	<=	2	S	neg	neg
20153419	72	>65	SAMN05221363	30	329530	563493	2056207	8	neg	404	3	2	5	<=	0.03	S	S	<=	0.03	S	<=	0.06	S	<=	0.06	S	S	<=	0.5	S	S	<=	0.5	S	neg	=	0.06	S	=	0.06	S	<=	1	S	<=	2	S	neg	neg
20153420	65	>65	SAMN05221364	31	281709	462630	1996311	8	neg	1480	3	2	5	<=	0.03	S	S	<=	0.03	S	<=	0.06	S	<=	0.06	S	S	<=	0.5	S	S	<=	0.5	S	neg	=	0.06	S	=	0.06	S	<=	1	S	<=	2	S	neg	neg
20153421	82	>65	SAMN05221365	25	218272	420720	2045339	23A	neg	338	0	1	1	=	0.25	R	S	=	0.06	S	<=	0.06	S	=	0.12	S	S	<=	0.5	S	S	<=	0.5	S	neg	=	0.06	S	=	0.06	S	<=	1	S	<=	2	S	neg	neg
20153422	44	19to64	SAMN05221366	59	105993	587658	2069975	9V	1	156	15	12	18	=	2	R	S	=	2	S	=	0.5	I	=	1	I	S	=	1	I	S	>	2	R	ERMB	>	32	R	>	2	R	<=	1	S	<=	2	S	pos	FOLA-I20L:FOLP_178-ins
20153423	69	>65	SAMN05221367	19	499489	857791	1996416	3	neg	180	2	3	2	<=	0.03	S	S	<=	0.03	S	<=	0.06	S	<=	0.06	S	S	<=	0.5	S	S	<=	0.5	S	neg	=	0.06	S	=	0.06	S	<=	1	S	<=	2	S	neg	neg
20153424	55	19to64	SAMN05221368	31	211802	357881	2026061	11A	neg	99	23	81	0	<=	0.03	S	S	<=	0.03	S	<=	0.06	S	<=	0.06	S	S	<=	0.5	S	S	<=	0.5	S	ERMB	>	32	R	>	2	R	<=	1	S	<=	2	S	pos	FOLA-E14D,I20L:FOLP_178-ins
20153425	47	19to64	SAMN05221369	69	109670	196169	2161104	35B	neg	452	0	0	0	<=	0.03	S	S	<=	0.03	S	<=	0.06	S	<=	0.06	S	S	<=	0.5	S	S	<=	0.5	S	neg	=	0.06	S	=	0.06	S	<=	1	S	<=	2	S	neg	neg
20153426	63	19to64	SAMN05221370	77	67577	189533	2034188	31	neg	10486	12	0	0	<=	0.03	S	S	<=	0.03	S	<=	0.06	S	<=	0.06	S	S	<=	0.5	S	S	<=	0.5	S	neg	=	0.06	S	=	0.06	S	<=	1	S	<=	2	S	neg	FOLP_178-ins
20153427	46	19to64	SAMN05221371	77	69627	158594	2013971	7F	2	191	2	0	2	<=	0.03	S	S	<=	0.03	S	<=	0.06	S	<=	0.06	S	S	<=	0.5	S	S	<=	0.5	S	neg	=	0.06	S	=	0.06	S	<=	1	S	<=	2	S	neg	neg
20153428	46	19to64	SAMN05221372	36	130354	315870	2083421	20	neg	1030	1	44	2	<=	0.03	S	S	<=	0.03	S	<=	0.06	S	<=	0.06	S	S	<=	0.5	S	S	<=	0.5	S	neg	=	0.06	S	=	0.06	S	<=	1	S	<=	2	S	neg	neg
20153429	51	19to64	SAMN05221373	41	169056	332852	2104716	23B	neg	1373	0	1	1	=	0.25	R	S	=	0.06	S	<=	0.06	S	=	0.12	S	S	<=	0.5	S	S	<=	0.5	S	neg	=	0.06	S	=	0.06	S	<=	1	S	<=	2	S	neg	FOLP_180-ins
20153430	53	19to64	SAMN05221374	70	74823	143329	2133413	4	1	244	0	0	3	<=	0.03	S	S	<=	0.03	S	<=	0.06	S	<=	0.06	S	S	<=	0.5	S	S	<=	0.5	S	neg	=	0.06	S	=	0.06	S	<=	1	S	<=	2	S	neg	FOLA-Q11H,E14D,I20L:FOLP_178-ins
20153431	60	19to64	SAMN05221375	32	184546	327607	2057263	33F	neg	10491	2	23	6	<=	0.03	S	S	=	0.06	S	<=	0.06	S	<=	0.06	S	S	<=	0.5	S	S	<=	0.5	S	MEF	=	8	R	=	0.06	S	<=	1	S	<=	2	S	neg	FOLP_189-ins
20153432	79	>65	SAMN05221376	49	126157	336569	2068741	19A	1:2	320	75	11	16	=	4	R	I	=	8	R	=	1	R	=	2	R	I	=	2	R	I	>	2	R	ERMB:MEF	>	32	R	>	2	R	<=	1	S	<=	2	S	pos	FOLA-Q1Y,Q11H,E14D,I20L:FOLP_195-ins
20153434	69	>65	SAMN05221378	30	150000	367690	2060861	17F	neg	392	11	0	0	<=	0.03	S	S	<=	0.03	S	<=	0.06	S	<=	0.06	S	S	<=	0.5	S	S	<=	0.5	S	MEF	=	8	R	=	0.06	S	<=	1	S	<=	2	S	neg	FOLA-Q1H,I20L
20153445	3	0-4	SAMN05221379	106	42306	87760	2111014	15A	1	3811	1	0	0	<=	0.03	S	S	<=	0.03	S	<=	0.06	S	<=	0.06	S	S	<=	0.5	S	S	<=	0.5	S	neg	=	0.06	S	=	0.06	S	<=	1	S	<=	2	S	neg	neg
20153446	71	>65	SAMN05221380	46	86585	236040	2052836	31	neg	10468	12	0	0	<=	0.03	S	S	<=	0.03	S	<=	0.06	S	<=	0.06	S	S	<=	0.5	S	S	<=	0.5	S	neg	=	0.06	S	=	0.06	S	<=	1	S	<=	2	S	neg	neg
20153447	73	>65	SAMN05221381	90	55688	110101	2144056	6C	neg	8446	0	0	124	<=	0.03	S	S	<=	0.03	S	<=	0.06	S	<=	0.06	S	S	<=	0.5	S	S	<=	0.5	S	ERMB	>	32	R	>	2	R	<=	1	S	<=	2	S	pos	neg
20153448	51	19to64	SAMN05221382	54	73773	187989	2048345	3	neg	180	2	0	2	<=	0.03	S	S	<=	0.03	S	<=	0.06	S	<=	0.06	S	S	<=	0.5	S	S	<=	0.5	S	ERMB:ERMBS:ERMBUP	=	0.06	S	=	0.06	S	<=	1	S	<=	2	S	neg	neg
20153449	43	19to64	SAMN05221383	394	8275	60184	2131109	22F	neg	433	1	2	2	<=	0.03	S	S	<=	0.03	S	<=	0.06	S	<=	0.06	S	S	<=	0.5	S	S	<=	0.5	S	neg	=	0.06	S	=	0.06	S	<=	1	S	<=	2	S	neg	neg
20153451	96	>65	SAMN05221384	88	46905	130507	2162551	6C	1	1092	6	7	8	=	0.5	R	S	=	1	S	=	0.25	S	=	0.5	S	S	<=	0.5	S	S	=	2	R	neg	=	0.06	S	=	0.06	S	<=	1	S	<=	2	S	neg	FOLA-Q1H,V3I,E14D,I20L:FOLP_195-ins
20153453	ND	ND	SAMN05221385	377	9135	59404	2025166	12F	neg	220	0	0	2	<=	0.03	S	S	<=	0.03	S	<=	0.06	S	<=	0.06	S	S	<=	0.5	S	S	<=	0.5	S	neg	=	0.06	S	=	0.06	S	<=	1	S	<=	2	S	neg	neg
20153454	82	>65	SAMN05221386	56	129814	324845	2100467	20	neg	1257	1	4	2	<=	0.03	S	S	<=	0.03	S	<=	0.06	S	<=	0.06	S	S	<=	0.5	S	S	<=	0.5	S	neg	=	0.06	S	=	0.06	S	<=	1	S	<=	2	S	neg	neg
20153455	101	>65	SAMN05221387	126	36262	103063	2147862	38	neg	393	2	4	0	<=	0.03	S	S	<=	0.03	S	<=	0.06	S	<=	0.06	S	S	<=	0.5	S	S	<=	0.5	S	neg	=	0.06	S	=	0.06	S	<=	1	S	<=	2	S	neg	neg
20153456	59	19to64	SAMN05221388	28	199171	674071	2042813	8	neg	1480	3	5	5	<=	0.03	S	S	<=	0.03	S	<=	0.06	S	<=	0.06	S	S	<=	0.5	S	S	<=	0.5	S	neg	=	0.06	S	=	0.06	S	<=	1	S	<=	2	S	neg	neg
20153457	54	19to64	SAMN05221389	47	134281	265214	2080899	10A	neg	1263	2	4	0	<=	0.03	S	S	<=	0.03	S	<=	0.06	S	<=	0.06	S	S	<=	0.5	S	S	<=	0.5	S	neg	=	0.06	S	=	0.06	S	<=	1	S	<=	2	S	neg	neg
20153458	78	>65	SAMN05221390	32	261373	488283	2052716	3	neg	180	2	0	111	=	0.06	S	S	=	0.06	S	<=	0.06	S	=	0.25	S	S	<=	0.5	S	S	=	1	I	ERMB	>	32	R	>	2	R	<=	1	S	<=	2	S	pos	neg
20153459	67	>65	SAMN05221391	31	193402	263668	1984308	3	neg	180	2	0	2	<=	0.03	S	S	<=	0.03	S	<=	0.06	S	<=	0.06	S	S	<=	0.5	S	S	<=	0.5	S	neg	=	0.06	S	=	0.06	S	<=	1	S	<=	2	S	neg	neg
20153460	90	>65	SAMN05221392	32	187943	265447	1983219	3	neg	180	2	0	2	<=	0.03	S	S	<=	0.03	S	<=	0.06	S	<=	0.06	S	S	<=	0.5	S	S	<=	0.5	S	neg	=	0.06	S	=	0.06	S	<=	1	S	<=	2	S	neg	neg
20153461	65	>65	SAMN05221393	262	44937	112620	2020492	3	neg	180	2	3	2	<=	0.03	S	S	<=	0.03	S	<=	0.06	S	<=	0.06	S	S	<=	0.5	S	S	<=	0.5	S	neg	=	0.06	S	=	0.06	S	<=	1	S	<=	2	S	neg	neg
20153462	61	19to64	SAMN05221394	30	153287	351978	1987108	12F	neg	220	0	0	2	<=	0.03	S	S	<=	0.03	S	<=	0.06	S	<=	0.06	S	S	<=	0.5	S	S	<=	0.5	S	neg	=	0.06	S	=	0.06	S	<=	1	S	<=	2	S	neg	neg
20153463	82	>65	SAMN05221395	56	88719	291365	2045901	12F	neg	218	0	0	0	<=	0.03	S	S	<=	0.03	S	<=	0.06	S	<=	0.06	S	S	<=	0.5	S	S	<=	0.5	S	MEF	=	8	R	=	0.06	S	<=	1	S	<=	2	S	neg	neg
20153464	75	>65	SAMN05221396	35	184165	297566	1979644	3	neg	180	2	0	2	<=	0.03	S	S	<=	0.03	S	<=	0.06	S	<=	0.06	S	S	<=	0.5	S	S	<=	0.5	S	neg	=	0.06	S	=	0.06	S	<=	1	S	<=	2	S	neg	neg
20153465	81	>65	SAMN05221397	52	93709	282425	2081421	6C	neg	1390	15	16	8	=	1	R	S	=	1	S	=	0.5	I	=	0.5	S	S	<=	0.5	S	S	>	2	R	MEF	=	8	R	=	0.06	S	<=	1	S	<=	2	S	neg	neg
20153466	79	>65	SAMN05221398	27	196881	457092	2080522	16F	neg	1840	0	10	2	<=	0.03	S	S	<=	0.03	S	<=	0.06	S	<=	0.06	S	S	<=	0.5	S	S	<=	0.5	S	neg	=	0.06	S	=	0.06	S	<=	1	S	<=	2	S	neg	neg
20153467	39	19to64	SAMN05221399	29	193136	297499	1983500	3	neg	180	2	0	2	<=	0.03	S	S	<=	0.03	S	<=	0.06	S	<=	0.06	S	S	<=	0.5	S	S	<=	0.5	S	neg	=	0.06	S	=	0.06	S	<=	1	S	<=	2	S	neg	neg
20153468	49	19to64	SAMN05221400	51	131181	286468	2097807	20	neg	1257	1	4	2	<=	0.03	S	S	<=	0.03	S	<=	0.06	S	<=	0.06	S	S	<=	0.5	S	S	<=	0.5	S	neg	=	0.06	S	=	0.06	S	<=	1	S	<=	2	S	neg	neg
20153469	52	19to64	SAMN05221401	23	435874	674396	1999503	8	neg	1480	3	5	5	<=	0.03	S	S	<=	0.03	S	<=	0.06	S	<=	0.06	S	S	<=	0.5	S	S	<=	0.5	S	neg	=	0.06	S	=	0.06	S	<=	1	S	<=	2	S	neg	neg
20153470	85	>65	SAMN05221402	38	199181	469525	2001351	8	neg	1480	3	5	5	<=	0.03	S	S	<=	0.03	S	<=	0.06	S	<=	0.06	S	S	<=	0.5	S	S	<=	0.5	S	neg	=	0.06	S	=	0.06	S	<=	1	S	<=	2	S	neg	neg
20153471	6	5to18	SAMN05221403	66	73312	266570	2121665	19A	neg	199	33	29	11	=	0.12	R	S	=	0.06	S	<=	0.06	S	<=	0.06	S	S	<=	0.5	S	S	<=	0.5	S	MEF	=	8	R	=	0.06	S	<=	1	S	<=	2	S	neg	FOLA-Q1H,I20L:FOLP_178-ins
20153472	82	>65	SAMN05221404	42	91779	216450	1979793	3	neg	180	2	0	2	<=	0.03	S	S	<=	0.03	S	<=	0.06	S	<=	0.06	S	S	<=	0.5	S	S	<=	0.5	S	neg	=	0.06	S	=	0.06	S	<=	1	S	<=	2	S	neg	neg
20153475	50	19to64	SAMN05221407	35	105282	245016	1998026	8	neg	53	3	6	5	<=	0.03	S	S	<=	0.03	S	<=	0.06	S	<=	0.06	S	S	<=	0.5	S	S	<=	0.5	S	neg	=	0.06	S	=	0.06	S	<=	1	S	<=	2	S	neg	neg
20153476	53	19to64	SAMN05221408	34	234497	354560	2029268	3	neg	180	2	3	2	<=	0.03	S	S	<=	0.03	S	<=	0.06	S	<=	0.06	S	S	<=	0.5	S	S	<=	0.5	S	neg	=	0.06	S	=	0.06	S	<=	1	S	<=	2	S	neg	neg
20153477	59	19to64	SAMN05221409	35	133715	288311	1982686	3	neg	180	2	0	2	<=	0.03	S	S	<=	0.03	S	<=	0.06	S	<=	0.06	S	S	<=	0.5	S	S	<=	0.5	S	neg	=	0.06	S	=	0.06	S	<=	1	S	<=	2	S	neg	neg
20153478	85	>65	SAMN05221410	45	86448	188411	2039191	35B	1	10493	4	7	7	=	2	R	S	=	4	I	=	0.5	I	=	1	I	S	=	1	I	S	>	2	R	MEF	=	8	R	=	0.06	S	<=	1	S	<=	2	S	neg	neg
20153479	45	19to64	SAMN05221411	46	97555	220456	2073160	33F	neg	13493	2	0	6	<=	0.03	S	S	<=	0.03	S	<=	0.06	S	<=	0.06	S	S	<=	0.5	S	S	<=	0.5	S	MEF	=	8	R	=	0.06	S	<=	1	S	<=	2	S	neg	FOLP_189-ins
20153526	51	19to64	SAMN05221412	45	102466	210843	2051512	35B	1	558	4	7	7	=	2	R	S	=	4	I	=	0.5	I	=	1	I	S	=	1	I	S	>	2	R	MEF	=	8	R	=	0.06	S	<=	1	S	<=	2	S	neg	neg
20153527	54	19to64	SAMN05221413	69	58112	152604	1986439	12F	neg	220	0	0	2	<=	0.03	S	S	<=	0.03	S	<=	0.06	S	<=	0.06	S	S	<=	0.5	S	S	<=	0.5	S	neg	=	0.06	S	=	0.06	S	<=	1	S	<=	2	S	neg	neg
20153528	37	19to64	SAMN05221414	66	48458	107395	2104351	23B	neg	1373	0	1	1	=	0.25	R	S	=	0.06	S	<=	0.06	S	=	0.12	S	S	<=	0.5	S	S	<=	0.5	S	neg	=	0.06	S	=	0.06	S	<=	1	S	<=	2	S	neg	FOLP_180-ins
20153529	1	0-4	SAMN05221415	104	38333	97225	2071965	22F	neg	9259	1	2	2	<=	0.03	S	S	<=	0.03	S	<=	0.06	S	<=	0.06	S	S	<=	0.5	S	S	<=	0.5	S	neg	=	0.06	S	=	0.06	S	<=	1	S	<=	2	S	neg	FOLA-Q1H,Q11H,E14D,I20L
20153530	65	>65	SAMN05221416	81	64958	181078	2113542	12F	neg	989	12	4	3	<=	0.03	S	S	<=	0.03	S	<=	0.06	S	<=	0.06	S	S	<=	0.5	S	S	<=	0.5	S	neg	=	0.06	S	=	0.06	S	<=	1	S	<=	2	S	neg	FOLA-I20L:FOLP_178-ins
20153856	32	19to64	SAMN05221417	68	70414	392163	2060380	19A	1:2	320	13	11	16	=	4	R	I	=	8	R	=	1	R	=	2	R	I	=	2	R	I	>	2	R	ERMB:MEF	>	32	R	>	2	R	<=	1	S	<=	2	S	pos	FOLA-Q1Y,Q11H,E14D,I20L:FOLP_195-ins
20153857	92	>65	SAMN05221418	38	133692	283747	2076780	33F	neg	2705	2	0	6	<=	0.03	S	S	<=	0.03	S	<=	0.06	S	<=	0.06	S	S	<=	0.5	S	S	<=	0.5	S	MEF	=	8	R	=	0.06	S	<=	1	S	<=	2	S	neg	FOLP_189-ins
20153858	80	>65	SAMN05221419	57	72081	165654	1995431	3	neg	180	2	3	2	<=	0.03	S	S	<=	0.03	S	<=	0.06	S	<=	0.06	S	S	<=	0.5	S	S	<=	0.5	S	neg	=	0.06	S	=	0.06	S	<=	1	S	<=	2	S	neg	neg
20153859	92	>65	SAMN05221420	63	61201	266344	2071918	15C	neg	4262	2	0	12	<=	0.03	S	S	<=	0.03	S	<=	0.06	S	<=	0.06	S	S	<=	0.5	S	S	<=	0.5	S	neg	=	0.06	S	=	0.06	S	<=	1	S	<=	2	S	neg	neg
20153860	75	>65	SAMN05221421	52	95750	446306	2072088	15A	neg	63	24	27	28	=	0.25	R	S	<=	0.03	S	<=	0.06	S	=	0.12	S	S	<=	0.5	S	S	<=	0.5	S	ERMB	>	32	R	>	2	R	<=	1	S	<=	2	S	pos	neg
20153861	63	19to64	SAMN05221422	71	74439	299801	2088255	19A	1:2	320	13	11	16	=	4	R	I	=	8	R	=	1	R	=	2	R	I	=	2	R	I	>	2	R	ERMB:MEF	>	32	R	>	2	R	<=	1	S	<=	2	S	pos	FOLA-Q1Y,Q11H,E14D,I20L:FOLP_195-ins
20153876	30	19to64	SAMN05221423	121	36508	107918	2141385	38	neg	393	2	4	0	<=	0.03	S	S	<=	0.03	S	<=	0.06	S	<=	0.06	S	S	<=	0.5	S	S	<=	0.5	S	neg	=	0.06	S	=	0.06	S	<=	1	S	<=	2	S	neg	neg
20153877	91	>65	SAMN05221424	80	60225	256235	2181363	15B	1	162	1	0	0	<=	0.03	S	S	<=	0.03	S	<=	0.06	S	<=	0.06	S	S	<=	0.5	S	S	<=	0.5	S	neg	=	0.06	S	=	0.06	S	<=	1	S	<=	2	S	neg	neg
20153878	41	19to64	SAMN05221425	74	70616	196361	2177569	9N	neg	66	1	0	0	<=	0.03	S	S	<=	0.03	S	<=	0.06	S	<=	0.06	S	S	<=	0.5	S	S	<=	0.5	S	neg	=	0.06	S	=	0.06	S	<=	1	S	<=	2	S	neg	neg
20153879	60	19to64	SAMN05221426	38	124161	436478	2089748	9N	neg	632	1	0	0	<=	0.03	S	S	<=	0.03	S	<=	0.06	S	<=	0.06	S	S	<=	0.5	S	S	<=	0.5	S	neg	=	0.06	S	=	0.06	S	<=	1	S	<=	2	S	neg	neg
20153880	0	0-4	SAMN05221427	65	60412	320459	2069020	23A	neg	338	0	1	1	=	0.25	R	S	=	0.06	S	<=	0.06	S	=	0.12	S	S	<=	0.5	S	S	<=	0.5	S	neg	=	0.06	S	=	0.06	S	<=	1	S	<=	2	S	neg	neg
20153881	24	19to64	SAMN05221428	79	56306	213947	2076872	35F	neg	1368	74	0	77	=	0.06	S	S	=	0.06	S	<=	0.06	S	<=	0.06	S	S	<=	0.5	S	S	<=	0.5	S	MEF	=	8	R	=	0.06	S	<=	1	S	<=	2	S	neg	neg
20153882	80	>65	SAMN05221429	40	121248	303144	2056745	33F	neg	100	2	0	6	<=	0.03	S	S	<=	0.03	S	<=	0.06	S	<=	0.06	S	S	<=	0.5	S	S	<=	0.5	S	MEF	=	8	R	=	0.06	S	<=	1	S	<=	2	S	neg	FOLP_189-ins
20153883	41	19to64	SAMN05221430	115	35977	103739	2022982	7F	2	191	2	0	2	<=	0.03	S	S	<=	0.03	S	<=	0.06	S	<=	0.06	S	S	<=	0.5	S	S	<=	0.5	S	neg	=	0.06	S	=	0.06	S	<=	1	S	<=	2	S	neg	neg
20153884	37	19to64	SAMN05221431	78	56889	163635	2017078	7F	2	191	2	0	2	<=	0.03	S	S	<=	0.03	S	<=	0.06	S	<=	0.06	S	S	<=	0.5	S	S	<=	0.5	S	neg	=	0.06	S	=	0.06	S	<=	1	S	<=	2	S	neg	neg
20153885	93	>65	SAMN05221432	57	86071	225212	2082325	22F	neg	433	1	2	59	<=	0.03	S	S	<=	0.03	S	<=	0.06	S	<=	0.06	S	S	<=	0.5	S	S	<=	0.5	S	MEF	=	8	R	=	0.06	S	<=	1	S	<=	2	S	neg	neg
20153886	67	>65	SAMN05221433	61	90422	148109	1998866	8	neg	1480	3	5	5	<=	0.03	S	S	<=	0.03	S	<=	0.06	S	<=	0.06	S	S	<=	0.5	S	S	<=	0.5	S	neg	=	0.06	S	=	0.06	S	<=	1	S	<=	2	S	neg	neg
20153888	72	>65	SAMN05221435	61	54945	120891	2075748	33F	neg	2705	2	0	6	<=	0.03	S	S	<=	0.03	S	<=	0.06	S	<=	0.06	S	S	<=	0.5	S	S	<=	0.5	S	MEF	=	8	R	=	0.06	S	<=	1	S	<=	2	S	neg	FOLP_189-ins
20153889	61	19to64	SAMN05221436	77	61803	183676	2119374	19F	2	654	2	0	0	<=	0.03	S	S	<=	0.03	S	<=	0.06	S	<=	0.06	S	S	<=	0.5	S	S	<=	0.5	S	neg	=	0.06	S	=	0.06	S	<=	1	S	<=	2	S	neg	neg
20153890	85	>65	SAMN05221437	105	57849	165008	2138107	7C	neg	1797	2	4	6	<=	0.03	S	S	<=	0.03	S	<=	0.06	S	<=	0.06	S	S	<=	0.5	S	S	<=	0.5	S	neg	=	0.06	S	=	0.06	S	<=	1	S	<=	2	S	neg	neg
20153891	45	19to64	SAMN05221438	42	91913	175764	1999906	11A	neg	62	2	6	10	<=	0.03	S	S	<=	0.03	S	<=	0.06	S	<=	0.06	S	S	<=	0.5	S	S	<=	0.5	S	neg	=	0.06	S	=	0.06	S	<=	1	S	<=	2	S	neg	FOLP_189-ins
20153892	0	0-4	SAMN05221439	69	65081	226506	2108157	23B	neg	338	0	1	1	=	0.25	R	S	=	0.06	S	<=	0.06	S	=	0.12	S	S	<=	0.5	S	S	<=	0.5	S	neg	=	0.06	S	=	0.06	S	<=	1	S	<=	2	S	neg	FOLA-I20L
20153893	29	19to64	SAMN05221440	76	60104	163600	2025852	37	neg	447	11	4	0	<=	0.03	S	S	<=	0.03	S	<=	0.06	S	<=	0.06	S	S	<=	0.5	S	S	<=	0.5	S	neg	=	0.06	S	=	0.06	S	<=	1	S	<=	2	S	neg	neg
20153894	75	>65	SAMN05221441	87	54163	121828	2018740	7F	2	191	2	0	2	<=	0.03	S	S	<=	0.03	S	<=	0.06	S	<=	0.06	S	S	<=	0.5	S	S	<=	0.5	S	neg	=	0.06	S	=	0.06	S	<=	1	S	<=	2	S	neg	neg
20153896	74	>65	SAMN05221442	51	95199	166381	2098516	20	neg	235	1	4	2	<=	0.03	S	S	<=	0.03	S	<=	0.06	S	<=	0.06	S	S	<=	0.5	S	S	<=	0.5	S	neg	=	0.06	S	=	0.06	S	<=	1	S	<=	2	S	neg	neg
20153897	0	0-4	SAMN05221443	286	13968	50933	2152006	19F	2	654	2	0	0	<=	0.03	S	S	<=	0.03	S	<=	0.06	S	<=	0.06	S	S	<=	0.5	S	S	<=	0.5	S	neg	=	0.06	S	=	0.06	S	<=	1	S	<=	2	S	neg	neg
20153898	59	19to64	SAMN05221444	103	42843	99164	2142447	9N	neg	66	1	0	0	<=	0.03	S	S	<=	0.03	S	<=	0.06	S	<=	0.06	S	S	<=	0.5	S	S	<=	0.5	S	neg	=	0.06	S	=	0.06	S	<=	1	S	<=	2	S	neg	neg
20153899	75	>65	SAMN05221445	128	45583	126714	2000947	8	neg	1480	3	5	5	<=	0.03	S	S	<=	0.03	S	<=	0.06	S	<=	0.06	S	S	<=	0.5	S	S	<=	0.5	S	neg	=	0.06	S	=	0.06	S	<=	1	S	<=	2	S	neg	neg
20153900	92	>65	SAMN05221446	67	63431	242566	2143204	23A	neg	338	0	1	1	=	0.25	R	S	=	0.06	S	<=	0.06	S	=	0.12	S	S	<=	0.5	S	S	<=	0.5	S	neg	=	0.06	S	=	0.06	S	<=	1	S	<=	2	S	neg	FOLA-I20L
20153901	73	>65	SAMN05221447	61	69476	184339	2017151	35B	1	558	4	7	7	=	2	R	S	=	4	I	=	0.5	I	=	1	I	S	=	1	I	S	>	2	R	MEF	=	8	R	=	0.06	S	<=	1	S	<=	2	S	neg	neg
20153902	76	>65	SAMN05221448	55	82921	142189	2016243	35B	1	558	4	7	7	=	2	R	S	=	4	I	=	0.5	I	=	1	I	S	=	1	I	S	>	2	R	MEF	=	8	R	=	0.06	S	<=	1	S	<=	2	S	neg	neg
20153903	48	19to64	SAMN05221449	24	238767	341387	2072986	23A	neg	10492	0	0	1	=	0.12	R	S	=	0.06	S	<=	0.06	S	=	0.12	S	S	<=	0.5	S	S	<=	0.5	S	MEF	=	8	R	=	0.06	S	<=	1	S	<=	2	S	neg	FOLP_189-ins
20153904	5	5to18	SAMN05221450	38	150771	351285	2074413	33F	neg	2705	2	0	6	<=	0.03	S	S	<=	0.03	S	<=	0.06	S	<=	0.06	S	S	<=	0.5	S	S	<=	0.5	S	MEF	=	8	R	=	0.06	S	<=	1	S	<=	2	S	neg	FOLP_189-ins
20153905	64	19to64	SAMN05221451	59	73044	209368	2071146	35F	neg	498	0	0	3	<=	0.03	S	S	<=	0.03	S	<=	0.06	S	<=	0.06	S	S	<=	0.5	S	S	<=	0.5	S	neg	=	0.06	S	=	0.06	S	<=	1	S	<=	2	S	neg	neg
20153906	61	19to64	SAMN05221452	31	199002	666594	1998568	8	neg	1480	3	5	5	<=	0.03	S	S	<=	0.03	S	<=	0.06	S	<=	0.06	S	S	<=	0.5	S	S	<=	0.5	S	neg	=	0.06	S	=	0.06	S	<=	1	S	<=	2	S	neg	neg
20153907	95	>65	SAMN05221453	116	42571	128090	2130567	15B	neg	199	2	0	0	<=	0.03	S	S	<=	0.03	S	<=	0.06	S	<=	0.06	S	S	<=	0.5	S	S	<=	0.5	S	neg	=	0.06	S	=	0.06	S	<=	1	S	<=	2	S	neg	neg
20153908	0	0-4	SAMN05221454	48	78168	325966	2038078	33F	neg	717	2	0	6	<=	0.03	S	S	<=	0.03	S	<=	0.06	S	<=	0.06	S	S	<=	0.5	S	S	<=	0.5	S	ERMB	>	32	R	>	2	R	<=	1	S	<=	2	S	pos	neg
20153909	85	>65	SAMN05221455	53	95158	198271	2116429	23A	neg	338	19	1	24	=	0.5	R	S	=	0.25	S	<=	0.06	S	=	0.25	S	S	<=	0.5	S	S	<=	0.5	S	ERMB	>	32	R	>	2	R	<=	1	S	<=	2	S	pos	neg
20153910	57	19to64	SAMN05221456	197	21651	87618	2110966	6C	neg	639	2	0	0	<=	0.03	S	S	<=	0.03	S	<=	0.06	S	<=	0.06	S	S	<=	0.5	S	S	<=	0.5	S	MEF	=	8	R	=	0.06	S	<=	1	S	<=	2	S	neg	neg
20153911	63	19to64	SAMN05221457	60	69330	203025	2064249	22F	neg	10163	1	2	2	<=	0.03	S	S	<=	0.03	S	<=	0.06	S	<=	0.06	S	S	<=	0.5	S	S	<=	0.5	S	MEF	=	8	R	=	0.06	S	<=	1	S	<=	2	S	neg	neg
20153912	59	19to64	SAMN05221458	158	23828	65216	2035826	31	neg	568	12	0	0	<=	0.03	S	S	<=	0.03	S	<=	0.06	S	<=	0.06	S	S	<=	0.5	S	S	<=	0.5	S	neg	=	0.06	S	=	0.06	S	<=	1	S	<=	2	S	neg	neg
20153913	74	>65	SAMN05221459	62	65819	293204	2083904	15A	neg	63	24	27	138	=	0.5	R	S	=	0.25	S	=	0.12	S	=	0.5	S	S	=	1	I	S	=	2	R	ERMB	>	32	R	>	2	R	<=	1	S	<=	2	S	pos	neg
20153914	61	19to64	SAMN05221460	57	62857	158540	2110554	23A	neg	338	0	1	1	=	0.25	R	S	=	0.06	S	<=	0.06	S	=	0.12	S	S	<=	0.5	S	S	<=	0.5	S	neg	=	0.06	S	=	0.06	S	<=	1	S	<=	2	S	neg	FOLA-I20L:FOLP_188-ins
20153915	82	>65	SAMN05221461	54	120564	266727	1994116	3	neg	180	2	3	2	<=	0.03	S	S	<=	0.03	S	<=	0.06	S	<=	0.06	S	S	<=	0.5	S	S	<=	0.5	S	neg	=	0.06	S	=	0.06	S	<=	1	S	<=	2	S	neg	neg
20153916	61	19to64	SAMN05221462	36	87333	400290	2060007	33F	neg	662	2	0	6	<=	0.03	S	S	<=	0.03	S	<=	0.06	S	<=	0.06	S	S	<=	0.5	S	S	<=	0.5	S	MEF	=	8	R	=	0.06	S	<=	1	S	<=	2	S	neg	neg
20153917	3	0-4	SAMN05221463	51	98690	297741	2056087	22F	neg	10163	1	2	2	<=	0.03	S	S	<=	0.03	S	<=	0.06	S	<=	0.06	S	S	<=	0.5	S	S	<=	0.5	S	MEF	=	8	R	=	0.06	S	<=	1	S	<=	2	S	neg	neg
20153918	35	19to64	SAMN05221464	45	106401	436391	1999372	8	neg	1480	3	5	5	<=	0.03	S	S	<=	0.03	S	<=	0.06	S	<=	0.06	S	S	<=	0.5	S	S	<=	0.5	S	neg	=	0.06	S	=	0.06	S	<=	1	S	<=	2	S	neg	neg
20153919	87	>65	SAMN05221465	35	154737	309872	1982406	3	neg	180	2	0	2	<=	0.03	S	S	<=	0.03	S	<=	0.06	S	<=	0.06	S	S	<=	0.5	S	S	<=	0.5	S	neg	=	0.06	S	=	0.06	S	<=	1	S	<=	2	S	neg	neg
20153920	54	19to64	SAMN05221466	47	84126	147919	2000739	8	neg	1480	3	NF	5	<=	0.03	S	S	<=	0.03	S	<=	0.06	S	<=	0.06	S	S	<=	0.03	S	S	<=	0.5	S	neg	=	0.06	S	=	0.06	S	<=	1	S	<=	2	S	neg	neg
20153921	36	19to64	SAMN05221467	30	213917	492869	1982911	3	neg	180	2	3	2	<=	0.03	S	S	<=	0.03	S	<=	0.06	S	<=	0.06	S	S	<=	0.5	S	S	<=	0.5	S	neg	=	0.06	S	=	0.06	S	<=	1	S	<=	2	S	neg	neg
20153922	53	19to64	SAMN05221468	34	113069	540864	2072882	23B	neg	36	2	0	120	<=	0.03	S	S	<=	0.03	S	<=	0.06	S	<=	0.06	S	S	<=	0.5	S	S	<=	0.5	S	neg	=	0.06	S	=	0.06	S	<=	1	S	<=	2	S	neg	neg
20153923	52	19to64	SAMN05221469	44	114804	383488	2031527	9N	neg	405	23	0	0	<=	0.03	S	S	<=	0.03	S	<=	0.06	S	<=	0.06	S	S	<=	0.5	S	S	<=	0.5	S	RPLD1-5K	=	0.06	S	=	0.06	S	<=	1	S	<=	2	S	neg	neg
20153924	71	>65	SAMN05221470	38	168172	279005	1982061	3	neg	180	2	0	2	<=	0.03	S	S	<=	0.03	S	<=	0.06	S	<=	0.06	S	S	<=	0.5	S	S	<=	0.5	S	neg	=	0.06	S	=	0.06	S	<=	1	S	<=	2	S	neg	neg
20153925	92	>65	SAMN05221471	36	104782	347766	2038208	11A	2	62	2	6	0	<=	0.03	S	S	<=	0.03	S	<=	0.06	S	<=	0.06	S	S	<=	0.5	S	S	<=	0.5	S	neg	=	0.06	S	=	0.06	S	<=	1	S	<=	2	S	neg	neg
20153926	78	>65	SAMN05221472	37	224871	305433	2068964	23A	neg	338	0	1	1	=	0.25	R	S	=	0.06	S	<=	0.06	S	=	0.12	S	S	<=	0.5	S	S	<=	0.5	S	neg	=	0.06	S	=	0.06	S	<=	1	S	<=	2	S	neg	FOLA-I20L
20153927	22	19to64	SAMN05221473	70	65670	176232	2132087	15A	neg	63	24	27	28	=	0.25	R	S	<=	0.03	S	<=	0.06	S	=	0.12	S	S	<=	0.5	S	S	<=	0.5	S	neg	=	0.06	S	=	0.06	S	<=	1	S	<=	2	S	neg	neg
20153928	56	19to64	SAMN05221474	65	71748	184691	2102979	7F	2	191	2	0	2	<=	0.03	S	S	<=	0.03	S	<=	0.06	S	<=	0.06	S	S	<=	0.5	S	S	<=	0.5	S	neg	=	0.06	S	=	0.06	S	<=	1	S	<=	2	S	neg	neg
20153929	1	0-4	SAMN05221475	37	266864	707860	2019096	3	neg	180	2	0	2	<=	0.03	S	S	<=	0.03	S	<=	0.06	S	<=	0.06	S	S	<=	0.5	S	S	<=	0.5	S	neg	=	0.06	S	=	0.06	S	<=	1	S	<=	2	S	neg	neg
20153930	55	19to64	SAMN05221476	29	188065	282393	1981284	3	neg	180	2	0	2	<=	0.03	S	S	<=	0.03	S	<=	0.06	S	<=	0.06	S	S	<=	0.5	S	S	<=	0.5	S	neg	=	0.06	S	=	0.06	S	<=	1	S	<=	2	S	neg	neg
20153931	53	19to64	SAMN05221477	51	125153	305501	2072688	23A	neg	338	0	1	1	=	0.25	R	S	=	0.06	S	<=	0.06	S	=	0.12	S	S	<=	0.5	S	S	<=	0.5	S	neg	=	0.06	S	=	0.06	S	<=	1	S	<=	2	S	neg	FOLA-I20L
20153932	55	19to64	SAMN05221478	25	168620	469302	2001474	8	neg	1480	3	5	5	<=	0.03	S	S	<=	0.03	S	<=	0.06	S	<=	0.06	S	S	<=	0.5	S	S	<=	0.5	S	neg	=	0.06	S	=	0.06	S	<=	1	S	<=	2	S	neg	neg
20153933	65	>65	SAMN05221479	101	57478	180317	2188160	7C	neg	1797	2	4	6	<=	0.03	S	S	<=	0.03	S	<=	0.06	S	<=	0.06	S	S	<=	0.5	S	S	<=	0.5	S	neg	=	0.06	S	=	0.06	S	<=	1	S	<=	2	S	neg	neg
20153934	65	>65	SAMN05221480	31	247186	708818	2142025	16F	neg	11261	9	0	3	<=	0.03	S	S	<=	0.03	S	<=	0.06	S	<=	0.06	S	S	<=	0.5	S	S	<=	0.5	S	MEF	=	8	R	=	0.06	S	<=	1	S	<=	2	S	neg	neg
20153935	89	>65	SAMN05221481	51	121898	207677	2099233	20	neg	1030	1	44	2	<=	0.03	S	S	<=	0.03	S	<=	0.06	S	<=	0.06	S	S	<=	0.5	S	S	<=	0.5	S	neg	=	0.06	S	=	0.06	S	<=	1	S	<=	2	S	neg	neg
20153936	71	>65	SAMN05221482	45	120306	264590	2120030	6C	1	1092	6	7	8	=	0.5	R	S	=	1	S	=	0.25	S	=	0.5	S	S	<=	0.5	S	S	=	2	R	neg	=	0.06	S	=	0.06	S	<=	1	S	<=	2	S	neg	FOLA-Q1H,V3I,E14D,I20L:FOLP_195-ins
20153937	78	>65	SAMN05221483	45	110335	267777	2023648	35B:35D	1	558	4	7	7	=	2	R	S	=	4	I	=	0.5	I	=	1	I	S	=	1	I	S	>	2	R	MEF	=	8	R	=	0.06	S	<=	1	S	<=	2	S	neg	neg
20153938	45	19to64	SAMN05221484	23	285673	500442	2029014	33F	neg	9029	2	0	6	<=	0.03	S	S	<=	0.03	S	<=	0.06	S	<=	0.06	S	S	<=	0.5	S	S	<=	0.5	S	MEF	=	8	R	=	0.06	S	<=	1	S	<=	2	S	neg	FOLP_189-ins
20153939	36	19to64	SAMN05221485	86	58892	272849	2176695	38	neg	393	2	4	0	<=	0.03	S	S	<=	0.03	S	<=	0.06	S	<=	0.06	S	S	<=	0.5	S	S	<=	0.5	S	neg	=	0.06	S	=	0.06	S	<=	1	S	<=	2	S	neg	neg
20153940	94	>65	SAMN05221486	48	114591	272678	2162699	23F	neg	81	15	12	18	=	2	R	S	=	2	S	=	0.5	I	=	1	I	S	=	1	I	S	>	2	R	MEF	=	8	R	=	0.06	S	<=	1	S	<=	2	S	neg	FOLA-Q1H,Q11H,E14D,I20L:FOLP_180-ins
20153941	80	>65	SAMN05221487	71	91335	240565	2022322	31	neg	1111	12	0	0	<=	0.03	S	S	<=	0.03	S	<=	0.06	S	<=	0.06	S	S	<=	0.5	S	S	<=	0.5	S	MEF	=	8	R	=	0.06	S	<=	1	S	<=	2	S	neg	neg
20153942	68	>65	SAMN05221488	23	294294	531104	2061679	33F	neg	100	2	0	6	<=	0.03	S	S	<=	0.03	S	<=	0.06	S	<=	0.06	S	S	<=	0.5	S	S	<=	0.5	S	MEF	=	8	R	=	0.06	S	<=	1	S	<=	2	S	neg	FOLP_189-ins
20153943	0	0-4	SAMN05221489	53	88935	182861	2113272	19F	2	654	2	0	0	<=	0.03	S	S	<=	0.03	S	<=	0.06	S	<=	0.06	S	S	<=	0.5	S	S	<=	0.5	S	neg	=	0.06	S	=	0.06	S	<=	1	S	<=	2	S	neg	neg
20153944	59	19to64	SAMN05221490	59	72908	267713	2035683	31	neg	3639	12	0	0	<=	0.03	S	S	<=	0.03	S	<=	0.06	S	<=	0.06	S	S	<=	0.5	S	S	<=	0.5	S	neg	=	0.06	S	=	0.06	S	<=	1	S	<=	2	S	neg	neg
20153945	0	0-4	SAMN05221491	33	165574	276997	2021333	35B	1	558	4	7	7	=	2	R	S	=	4	I	=	0.5	I	=	1	I	S	=	1	I	S	>	2	R	MEF	=	8	R	=	0.06	S	<=	1	S	<=	2	S	neg	neg
20153946	62	19to64	SAMN05221492	29	339815	790003	2028955	3	neg	180	2	3	2	<=	0.03	S	S	<=	0.03	S	<=	0.06	S	<=	0.06	S	S	<=	0.5	S	S	<=	0.5	S	neg	=	0.06	S	=	0.06	S	<=	1	S	<=	2	S	neg	neg
20153947	47	19to64	SAMN05221493	41	135593	257816	2099130	9N	neg	66	1	0	0	<=	0.03	S	S	<=	0.03	S	<=	0.06	S	<=	0.06	S	S	<=	0.5	S	S	<=	0.5	S	neg	=	0.06	S	=	0.06	S	<=	1	S	<=	2	S	neg	neg
20153948	53	19to64	SAMN05221494	118	33222	131435	1995975	12F	neg	220	0	0	2	<=	0.03	S	S	<=	0.03	S	<=	0.06	S	<=	0.06	S	S	<=	0.5	S	S	<=	0.5	S	neg	=	0.06	S	=	0.06	S	<=	1	S	<=	2	S	neg	neg
20153949	85	>65	SAMN05221495	69	87322	257132	2074075	19A	neg	4179	18	83	8	=	4	R	I	=	8	R	=	1	R	=	1	I	S	=	2	R	I	>	2	R	neg	=	0.06	S	=	0.06	S	<=	1	S	<=	2	S	neg	FOLA-Q1H,I20L:FOLP_178-ins
20153950	0	0-4	SAMN05221496	30	134115	428532	2070409	23A	neg	338	0	1	1	=	0.25	R	S	=	0.06	S	<=	0.06	S	=	0.12	S	S	<=	0.5	S	S	<=	0.5	S	neg	=	0.06	S	=	0.06	S	<=	1	S	<=	2	S	neg	FOLA-I20L
20153951	59	19to64	SAMN05221497	20	310135	604585	2039977	3	neg	10457	2	0	6	<=	0.03	S	S	<=	0.03	S	<=	0.06	S	<=	0.06	S	S	<=	0.5	S	S	<=	0.5	S	neg	=	0.06	S	=	0.06	S	<=	1	S	<=	2	S	neg	FOLP_189-ins
20153952	34	19to64	SAMN05221498	67	94792	178287	2044911	11A	2	62	2	6	0	<=	0.03	S	S	<=	0.03	S	<=	0.06	S	<=	0.06	S	S	<=	0.5	S	S	<=	0.5	S	neg	=	0.06	S	=	0.06	S	<=	1	S	<=	2	S	neg	neg
20153953	85	>65	SAMN05221499	36	155140	319595	2118836	23A	neg	338	19	1	24	=	0.5	R	S	=	0.25	S	<=	0.06	S	=	0.25	S	S	<=	0.5	S	S	<=	0.5	S	ERMB	>	32	R	>	2	R	<=	1	S	<=	2	S	pos	neg
20153954	58	19to64	SAMN05221500	66	69647	163578	2012779	7F	2	2469	2	0	2	<=	0.03	S	S	<=	0.03	S	<=	0.06	S	<=	0.06	S	S	<=	0.5	S	S	<=	0.5	S	neg	=	0.06	S	=	0.06	S	<=	1	S	<=	2	S	neg	neg
20153955	47	19to64	SAMN05221501	72	61814	183633	2116164	19F	2	654	2	0	0	<=	0.03	S	S	<=	0.03	S	<=	0.06	S	<=	0.06	S	S	<=	0.5	S	S	<=	0.5	S	neg	=	0.06	S	=	0.06	S	<=	1	S	<=	2	S	neg	neg
20153956	56	19to64	SAMN05221502	35	597066	617759	2029508	3	neg	180	2	3	2	<=	0.03	S	S	<=	0.03	S	<=	0.06	S	<=	0.06	S	S	<=	0.5	S	S	<=	0.5	S	neg	=	0.06	S	=	0.06	S	<=	1	S	<=	2	S	neg	neg
20153957	57	19to64	SAMN05221503	35	103848	433360	1997284	8	neg	1480	3	5	5	<=	0.03	S	S	<=	0.03	S	<=	0.06	S	<=	0.06	S	S	<=	0.5	S	S	<=	0.5	S	neg	=	0.06	S	=	0.06	S	<=	1	S	<=	2	S	neg	neg
20153958	65	>65	SAMN05221504	33	167588	374114	1995718	3	neg	180	2	3	2	<=	0.03	S	S	<=	0.03	S	<=	0.06	S	<=	0.06	S	S	<=	0.5	S	S	<=	0.5	S	neg	=	0.06	S	=	0.06	S	<=	1	S	<=	2	S	neg	neg
20153959	71	>65	SAMN05221505	70	84822	309814	2124991	15A	neg	11262	24	27	28	=	0.25	R	S	<=	0.03	S	<=	0.06	S	=	0.12	S	S	<=	0.5	S	S	<=	0.5	S	ERMB	>	32	R	>	2	R	<=	1	S	<=	2	S	pos	neg
20153960	7	5to18	SAMN05221506	76	71024	163560	2138264	4	1	695	0	0	0	<=	0.03	S	S	<=	0.03	S	<=	0.06	S	<=	0.06	S	S	<=	0.5	S	S	<=	0.5	S	MEF	=	8	R	=	0.06	S	<=	1	S	<=	2	S	neg	neg
20153961	15	5to18	SAMN05221507	62	104459	194015	2077168	15A	neg	63	24	27	28	=	0.25	R	S	<=	0.03	S	<=	0.06	S	=	0.12	S	S	<=	0.5	S	S	<=	0.5	S	ERMB	>	32	R	>	2	R	<=	1	S	<=	2	S	pos	neg
20153962	65	>65	SAMN05221508	107	73818	262646	2024751	3	neg	180	2	3	2	<=	0.03	S	S	<=	0.03	S	<=	0.06	S	<=	0.06	S	S	<=	0.5	S	S	<=	0.5	S	neg	=	0.06	S	=	0.06	S	<=	1	S	<=	2	S	neg	neg
20153963	60	19to64	SAMN05221509	40	108182	258811	2063237	33F	neg	100	2	0	6	<=	0.03	S	S	<=	0.03	S	<=	0.06	S	<=	0.06	S	S	<=	0.5	S	S	<=	0.5	S	MEF	=	8	R	=	0.06	S	<=	1	S	<=	2	S	neg	FOLP_189-ins
20153964	68	>65	SAMN05221510	34	163554	381241	2071426	33F	neg	2705	2	0	6	<=	0.03	S	S	<=	0.03	S	<=	0.06	S	<=	0.06	S	S	<=	0.5	S	S	<=	0.5	S	MEF	=	8	R	=	0.06	S	<=	1	S	<=	2	S	neg	FOLP_189-ins
20153965	32	19to64	SAMN05221511	56	77910	188962	2086002	22F	neg	433	1	2	2	<=	0.03	S	S	<=	0.03	S	<=	0.06	S	<=	0.06	S	S	<=	0.5	S	S	<=	0.5	S	neg	=	0.06	S	=	0.06	S	<=	1	S	<=	2	S	neg	neg
20153966	55	19to64	SAMN05221512	50	103361	286383	2061574	22F	neg	7314	1	2	2	<=	0.03	S	S	<=	0.03	S	<=	0.06	S	<=	0.06	S	S	<=	0.5	S	S	<=	0.5	S	MEF	=	8	R	=	0.06	S	<=	1	S	<=	2	S	neg	neg
20153967	88	>65	SAMN05221513	73	80965	155710	2076736	6C	neg	639	2	0	0	<=	0.03	S	S	<=	0.03	S	<=	0.06	S	<=	0.06	S	S	<=	0.5	S	S	<=	0.5	S	neg	=	0.06	S	=	0.06	S	<=	1	S	<=	2	S	neg	neg
20153968	48	19to64	SAMN05221514	72	71292	223173	2107465	23A	neg	338	0	1	1	=	0.25	R	S	=	0.06	S	<=	0.06	S	=	0.12	S	S	<=	0.5	S	S	<=	0.5	S	neg	=	0.06	S	=	0.06	S	<=	1	S	<=	2	S	neg	neg
20153969	53	19to64	SAMN05221515	50	91692	203941	1990747	8	neg	2234	0	4	2	<=	0.03	S	S	<=	0.03	S	<=	0.06	S	<=	0.06	S	S	<=	0.5	S	S	<=	0.5	S	neg	=	0.06	S	=	0.06	S	<=	1	S	<=	2	S	neg	neg
20153970	55	19to64	SAMN05221516	52	98123	296024	2107738	18C	neg	113	0	4	0	<=	0.03	S	S	<=	0.03	S	<=	0.06	S	<=	0.06	S	S	<=	0.5	S	S	<=	0.5	S	neg	=	0.06	S	=	0.06	S	<=	1	S	<=	2	S	neg	FOLP_169-ins
20153971	84	>65	SAMN05221517	85	59313	126275	2112295	19A	neg	4179	18	83	8	=	4	R	I	=	8	R	=	1	R	=	1	I	S	=	2	R	I	>	2	R	neg	=	0.06	S	=	0.06	S	<=	1	S	<=	2	S	neg	FOLA-Q1H,I20L:FOLP_178-ins
20153972	0	0-4	SAMN05221518	77	55958	178157	2104062	15C	1	177	23	0	139	<=	0.03	S	S	<=	0.03	S	<=	0.06	S	<=	0.06	S	S	<=	0.5	S	S	<=	0.5	S	neg	=	0.06	S	=	0.06	S	<=	1	S	<=	2	S	neg	FOLA-Q1H,I20L:FOLP_177-ins:FOLP_180-ins
20153973	91	>65	SAMN05221519	51	76532	266550	2094370	15B	1	1757	1	0	0	<=	0.03	S	S	<=	0.03	S	<=	0.06	S	<=	0.06	S	S	<=	0.5	S	S	<=	0.5	S	neg	=	0.06	S	=	0.06	S	<=	1	S	<=	2	S	neg	neg
20153974	50	19to64	SAMN05221520	61	82893	158203	2021901	35B	1	558	4	7	7	=	2	R	S	=	4	I	=	0.5	I	=	1	I	S	=	1	I	S	>	2	R	neg	=	0.06	S	=	0.06	S	<=	1	S	<=	2	S	neg	neg
20153975	10	5to18	SAMN05221521	56	103001	412922	2109832	35F	neg	1635	0	0	3	<=	0.03	S	S	<=	0.03	S	<=	0.06	S	<=	0.06	S	S	<=	0.5	S	S	<=	0.5	S	neg	=	0.06	S	=	0.06	S	<=	1	S	<=	2	S	neg	neg
20153976	81	>65	SAMN05221522	72	69278	206443	2113103	15B	neg	199	2	0	12	<=	0.03	S	S	<=	0.03	S	<=	0.06	S	<=	0.06	S	S	<=	0.5	S	S	<=	0.5	S	neg	=	0.06	S	=	0.06	S	<=	1	S	<=	2	S	neg	neg
20153977	81	>65	SAMN05221523	94	47171	139904	2158917	22F	neg	433	1	2	59	<=	0.03	S	S	<=	0.03	S	<=	0.06	S	<=	0.06	S	S	<=	0.5	S	S	<=	0.5	S	neg	=	0.06	S	=	0.06	S	<=	1	S	<=	2	S	neg	neg
20153978	1	0-4	SAMN05221524	96	60718	235693	2135965	38	neg	393	2	4	0	<=	0.03	S	S	<=	0.03	S	<=	0.06	S	<=	0.06	S	S	<=	0.5	S	S	<=	0.5	S	neg	=	0.06	S	=	0.06	S	<=	1	S	<=	2	S	neg	neg
20153979	74	>65	SAMN05221525	180	40547	119401	2071921	19F	1:2	271	13	14	20	=	4	R	I	=	8	R	=	1	R	=	1	I	S	=	1	I	S	>	2	R	ERMB:MEF	>	32	R	>	2	R	<=	1	S	<=	2	S	pos	FOLA-Q1Y,Q11H,E14D,I20L:FOLP_177-ins:FOLP_180-ins
20153980	86	>65	SAMN05221526	75	55502	170634	2069941	19A	neg	4179	18	83	8	=	4	R	I	=	8	R	=	1	R	=	1	I	S	=	2	R	I	>	2	R	neg	=	0.06	S	=	0.06	S	<=	1	S	<=	2	S	neg	FOLA-Q1H,I20L:FOLP_178-ins
20153981	78	>65	SAMN05221527	66	86241	250697	2090957	23A	neg	338	19	1	24	=	0.5	R	S	=	0.25	S	<=	0.06	S	=	0.25	S	S	<=	0.5	S	S	<=	0.5	S	ERMB	>	32	R	>	2	R	<=	1	S	<=	2	S	pos	neg
20153982	61	19to64	SAMN05221528	30	308405	758281	2028078	3	neg	180	2	3	2	<=	0.03	S	S	<=	0.03	S	<=	0.06	S	<=	0.06	S	S	<=	0.5	S	S	<=	0.5	S	neg	=	0.06	S	=	0.06	S	<=	1	S	<=	2	S	neg	neg
20153983	87	>65	SAMN05221529	198	20126	79981	2110571	7C	neg	1797	2	4	6	<=	0.03	S	S	<=	0.03	S	<=	0.06	S	<=	0.06	S	S	<=	0.5	S	S	<=	0.5	S	neg	=	0.06	S	=	0.06	S	<=	1	S	<=	2	S	neg	neg
20153984	61	19to64	SAMN05221530	60	69294	142274	2059816	22F	neg	10163	1	2	2	<=	0.03	S	S	<=	0.03	S	<=	0.06	S	<=	0.06	S	S	<=	0.5	S	S	<=	0.5	S	MEF	=	8	R	=	0.06	S	<=	1	S	<=	2	S	neg	neg
20153985	35	19to64	SAMN05221531	59	83268	295194	2134596	16F	neg	11263	0	84	140	=	0.12	R	S	=	0.06	S	<=	0.06	S	<=	0.06	S	S	<=	0.5	S	S	<=	0.5	S	neg	=	0.06	S	=	0.06	S	<=	1	S	<=	2	S	neg	neg
20153986	69	>65	SAMN05221532	46	104411	299559	2056734	11A	2	62	2	6	0	<=	0.03	S	S	<=	0.03	S	<=	0.06	S	<=	0.06	S	S	<=	0.5	S	S	<=	0.5	S	MEF	=	8	R	=	0.06	S	<=	1	S	<=	2	S	neg	neg
20153987	67	>65	SAMN05221533	50	102691	201109	2047280	28A	neg	494	2	2	2	<=	0.03	S	S	<=	0.03	S	<=	0.06	S	<=	0.06	S	S	<=	0.5	S	S	<=	0.5	S	neg	=	0.06	S	=	0.06	S	<=	1	S	<=	2	S	neg	neg
20153988	57	19to64	SAMN05221534	32	183206	379225	1994992	3	neg	180	2	3	2	<=	0.03	S	S	<=	0.03	S	<=	0.06	S	<=	0.06	S	S	<=	0.5	S	S	<=	0.5	S	neg	=	0.06	S	=	0.06	S	<=	1	S	<=	2	S	neg	neg
20153989	60	19to64	SAMN05221535	88	65065	171173	2108153	6C	neg	1692	2	6	0	<=	0.03	S	S	<=	0.03	S	<=	0.06	S	<=	0.06	S	S	<=	0.5	S	S	<=	0.5	S	neg	=	0.06	S	=	0.06	S	<=	1	S	<=	2	S	neg	neg
20153990	47	19to64	SAMN05221536	55	66282	200496	2056631	22F	neg	7314	1	2	2	<=	0.03	S	S	<=	0.03	S	<=	0.06	S	<=	0.06	S	S	<=	0.5	S	S	<=	0.5	S	MEF	=	8	R	=	0.06	S	<=	1	S	<=	2	S	neg	neg
20153991	70	>65	SAMN05221537	58	79864	310620	2051363	9N	neg	405	23	0	0	<=	0.03	S	S	<=	0.03	S	<=	0.06	S	<=	0.06	S	S	<=	0.5	S	S	<=	0.5	S	neg	=	0.06	S	=	0.06	S	<=	1	S	<=	2	S	neg	neg
20153992	95	>65	SAMN05221538	101	47159	229815	2163867	34	neg	547	0	0	2	<=	0.03	S	S	<=	0.03	S	<=	0.06	S	<=	0.06	S	S	<=	0.5	S	S	<=	0.5	S	neg	=	0.06	S	=	0.06	S	<=	1	S	<=	2	S	neg	neg
20153993	25	19to64	SAMN05221539	61	88478	264229	2139953	23B	neg	1373	0	1	1	=	0.25	R	S	=	0.06	S	<=	0.06	S	=	0.12	S	S	<=	0.5	S	S	<=	0.5	S	neg	=	0.06	S	=	0.06	S	<=	1	S	<=	2	S	neg	FOLP_180-ins
20153994	44	19to64	SAMN05221540	67	58516	132920	2076497	22F	neg	433	1	2	2	<=	0.03	S	S	<=	0.03	S	<=	0.06	S	<=	0.06	S	S	<=	0.5	S	S	<=	0.5	S	neg	=	0.06	S	=	0.06	S	<=	1	S	<=	2	S	neg	neg
20153995	0	0-4	SAMN05221541	78	57924	125996	2029184	12F	neg	218	0	0	0	<=	0.03	S	S	<=	0.03	S	<=	0.06	S	<=	0.06	S	S	<=	0.5	S	S	<=	0.5	S	MEF	=	8	R	=	0.06	S	<=	1	S	<=	2	S	neg	neg
20153996	52	19to64	SAMN05221542	86	56518	124298	2102379	19A	1:2	1451	13	11	16	=	4	R	I	=	8	R	=	1	R	=	2	R	I	=	2	R	I	>	2	R	ERMB:MEF	>	32	R	>	2	R	<=	1	S	<=	2	S	pos	FOLA-Q1Y,Q11H,E14D,I20L:FOLP_195-ins
20153997	75	>65	SAMN05221543	62	66101	199612	2025549	3	neg	180	2	3	2	<=	0.03	S	S	<=	0.03	S	<=	0.06	S	<=	0.06	S	S	<=	0.5	S	S	<=	0.5	S	neg	=	0.06	S	=	0.06	S	<=	1	S	<=	2	S	neg	neg
20153998	88	>65	SAMN05221544	68	61952	226243	2111899	23A	neg	338	0	1	1	=	0.25	R	S	=	0.06	S	<=	0.06	S	=	0.12	S	S	<=	0.5	S	S	<=	0.5	S	MEF	=	8	R	=	0.06	S	<=	1	S	<=	2	S	neg	neg
20153999	36	19to64	SAMN05221545	53	91377	216474	1985578	3	neg	180	2	0	2	<=	0.03	S	S	<=	0.03	S	<=	0.06	S	<=	0.06	S	S	<=	0.5	S	S	<=	0.5	S	neg	=	0.06	S	=	0.06	S	<=	1	S	<=	2	S	neg	neg
20154000	47	19to64	SAMN05221546	63	72755	284810	2159511	19A	neg	199	0	29	141	=	0.12	R	S	=	0.12	S	<=	0.06	S	<=	0.06	S	S	<=	0.5	S	S	<=	0.5	S	MEF	=	8	R	=	0.06	S	<=	1	S	<=	2	S	neg	FOLA-Q1H,I20L:FOLP_178-ins
20154001	55	19to64	SAMN05221547	30	282752	424588	1980700	3	neg	180	2	0	2	<=	0.03	S	S	<=	0.03	S	<=	0.06	S	<=	0.06	S	S	<=	0.5	S	S	<=	0.5	S	neg	=	0.06	S	=	0.06	S	<=	1	S	<=	2	S	neg	neg
20154002	53	19to64	SAMN05221849	41	100950	286922	2086083	16F	neg	1840	0	10	2	<=	0.03	S	S	<=	0.03	S	<=	0.06	S	<=	0.06	S	S	<=	0.5	S	S	<=	0.5	S	neg	=	0.06	S	=	0.06	S	<=	1	S	<=	2	S	neg	neg
20154241	61	19to64	SAMN05221850	38	167540	354708	1994174	3	neg	180	2	3	2	<=	0.03	S	S	<=	0.03	S	<=	0.06	S	<=	0.06	S	S	<=	0.5	S	S	<=	0.5	S	neg	=	0.06	S	=	0.06	S	<=	1	S	<=	2	S	neg	neg
20154242	25	19to64	SAMN05221851	48	135076	275545	2098566	9N	neg	66	1	0	0	<=	0.03	S	S	<=	0.03	S	<=	0.06	S	<=	0.06	S	S	<=	0.5	S	S	<=	0.5	S	neg	=	0.06	S	=	0.06	S	<=	1	S	<=	2	S	neg	neg
20154243	58	19to64	SAMN05221852	53	95388	258023	2059759	6C	neg	5241	0	86	80	=	0.25	R	S	=	0.25	S	=	0.12	S	=	0.25	S	S	<=	0.5	S	S	<=	0.5	S	neg	=	0.06	S	=	0.06	S	<=	1	S	<=	2	S	neg	FOLP_173-ins
20154244	55	19to64	SAMN05221853	35	200518	356277	1985959	3	neg	180	2	0	2	<=	0.03	S	S	<=	0.03	S	<=	0.06	S	<=	0.06	S	S	<=	0.5	S	S	<=	0.5	S	neg	=	0.06	S	=	0.06	S	<=	1	S	<=	2	S	neg	neg
20154245	43	19to64	SAMN05221854	61	69841	322376	2141334	13	1	11264	11	0	0	<=	0.03	S	S	<=	0.03	S	<=	0.06	S	<=	0.06	S	S	<=	0.5	S	S	<=	0.5	S	neg	=	0.06	S	=	0.06	S	<=	1	S	<=	2	S	neg	neg
20154246	50	19to64	SAMN05221855	36	187975	297522	1984310	3	neg	180	2	0	2	<=	0.03	S	S	<=	0.03	S	<=	0.06	S	<=	0.06	S	S	<=	0.5	S	S	<=	0.5	S	neg	=	0.06	S	=	0.06	S	<=	1	S	<=	2	S	neg	neg
20154248	0	0-4	SAMN05221857	51	127476	405069	2114582	15C	neg	199	2	0	2	<=	0.03	S	S	<=	0.03	S	<=	0.06	S	<=	0.06	S	S	<=	0.5	S	S	<=	0.5	S	neg	=	0.06	S	=	0.06	S	<=	1	S	<=	2	S	neg	neg
20154249	83	>65	SAMN05221858	31	193390	261376	1982767	3	neg	180	2	0	2	<=	0.03	S	S	<=	0.03	S	<=	0.06	S	<=	0.06	S	S	<=	0.5	S	S	<=	0.5	S	neg	=	0.06	S	=	0.06	S	<=	1	S	<=	2	S	neg	neg
20154250	67	>65	SAMN05221859	39	158515	364793	2014807	11A	neg	62	2	6	10	<=	0.03	S	S	<=	0.03	S	<=	0.06	S	<=	0.06	S	S	<=	0.5	S	S	<=	0.5	S	neg	=	0.06	S	=	0.06	S	<=	1	S	<=	2	S	neg	neg
20154253	52	19to64	SAMN05221862	73	98150	267293	2169679	19A	neg	199	0	29	11	=	0.12	R	S	=	0.12	S	<=	0.06	S	<=	0.06	S	S	<=	0.5	S	S	<=	0.5	S	MEF	=	8	R	=	0.06	S	<=	1	S	<=	2	S	neg	neg
20154254	52	19to64	SAMN05221863	47	129746	325365	2085593	20	neg	1257	1	4	2	<=	0.03	S	S	<=	0.03	S	<=	0.06	S	<=	0.06	S	S	<=	0.5	S	S	<=	0.5	S	neg	=	0.06	S	=	0.06	S	<=	1	S	<=	2	S	neg	neg
20154255	61	19to64	SAMN05221864	56	101548	186282	2119067	19F	2	654	2	0	0	<=	0.03	S	S	<=	0.03	S	<=	0.06	S	<=	0.06	S	S	<=	0.5	S	S	<=	0.5	S	neg	=	0.06	S	=	0.06	S	<=	1	S	<=	2	S	neg	neg
20154256	47	19to64	SAMN05221865	63	119740	332257	2104773	20	neg	1257	1	4	2	<=	0.03	S	S	<=	0.03	S	<=	0.06	S	<=	0.06	S	S	<=	0.5	S	S	<=	0.5	S	neg	=	0.06	S	=	0.06	S	<=	1	S	<=	2	S	neg	neg
20154257	53	19to64	SAMN05221866	49	100268	381299	2030244	12F	neg	218	0	0	0	<=	0.03	S	S	<=	0.03	S	<=	0.06	S	<=	0.06	S	S	<=	0.5	S	S	<=	0.5	S	MEF	=	8	R	=	0.06	S	<=	1	S	<=	2	S	neg	FOLA-Q1Y,Q11H,E14D,I20L
20154258	40	19to64	SAMN05221867	57	85601	218789	2029248	12F	neg	218	0	0	0	<=	0.03	S	S	<=	0.03	S	<=	0.06	S	<=	0.06	S	S	<=	0.5	S	S	<=	0.5	S	MEF	=	8	R	=	0.06	S	<=	1	S	<=	2	S	neg	FOLA-Q1Y,Q11H,E14D,I20L
20154259	60	19to64	SAMN05221868	47	166239	325353	2087821	20	neg	1257	1	4	2	<=	0.03	S	S	<=	0.03	S	<=	0.06	S	<=	0.06	S	S	<=	0.5	S	S	<=	0.5	S	neg	=	0.06	S	=	0.06	S	<=	1	S	<=	2	S	neg	neg
20154260	42	19to64	SAMN05221869	59	94432	358354	1993936	8	neg	1480	3	5	5	<=	0.03	S	S	<=	0.03	S	<=	0.06	S	<=	0.06	S	S	<=	0.5	S	S	<=	0.5	S	neg	=	0.06	S	=	0.06	S	<=	1	S	<=	2	S	neg	neg
20154261	54	19to64	SAMN05221870	33	152469	351896	1985854	12F	neg	220	0	0	2	<=	0.03	S	S	<=	0.03	S	<=	0.06	S	<=	0.06	S	S	<=	0.5	S	S	<=	0.5	S	neg	=	0.06	S	=	0.06	S	<=	1	S	<=	2	S	neg	neg
20154262	65	>65	SAMN05221871	25	237198	469586	1999808	8	neg	1480	3	5	5	<=	0.03	S	S	<=	0.03	S	<=	0.06	S	<=	0.06	S	S	<=	0.5	S	S	<=	0.5	S	neg	=	0.06	S	=	0.06	S	<=	1	S	<=	2	S	neg	neg
20154263	89	>65	SAMN05221872	33	112798	231906	1981285	12F	neg	220	0	0	2	<=	0.03	S	S	<=	0.03	S	<=	0.06	S	<=	0.06	S	S	<=	0.5	S	S	<=	0.5	S	neg	=	0.06	S	=	0.06	S	<=	1	S	<=	2	S	neg	neg
20154264	48	19to64	SAMN05221873	40	106121	297813	2051731	35B	1	10493	4	7	7	=	2	R	S	=	4	I	=	0.5	I	=	1	I	S	=	1	I	S	>	2	R	MEF	=	8	R	=	0.06	S	<=	1	S	<=	2	S	neg	FOLA-Q1H,Q11H,E14D,I20L
20154265	67	>65	SAMN05221874	44	108513	298980	2063043	22F	neg	7314	1	2	2	<=	0.03	S	S	<=	0.03	S	<=	0.06	S	<=	0.06	S	S	<=	0.5	S	S	<=	0.5	S	MEF	=	8	R	=	0.06	S	<=	1	S	<=	2	S	neg	neg
20154266	1	0-4	SAMN05221875	30	214882	309598	2064790	33F	neg	100	2	85	9	=	0.12	R	S	=	0.25	S	=	0.12	S	=	0.12	S	S	<=	0.5	S	S	<=	0.5	S	MEF	=	8	R	=	0.06	S	<=	1	S	<=	2	S	neg	FOLP_189-ins
20154267	65	>65	SAMN05221876	45	110197	298450	2060224	22F	neg	7314	1	2	2	<=	0.03	S	S	<=	0.03	S	<=	0.06	S	<=	0.06	S	S	<=	0.5	S	S	<=	0.5	S	MEF	=	8	R	=	0.06	S	<=	1	S	<=	2	S	neg	neg
20154268	80	>65	SAMN05221877	38	155349	187740	1988260	12F	neg	220	0	0	2	<=	0.03	S	S	<=	0.03	S	<=	0.06	S	<=	0.06	S	S	<=	0.5	S	S	<=	0.5	S	neg	=	0.06	S	=	0.06	S	<=	1	S	<=	2	S	neg	neg
20154269	82	>65	SAMN05221878	37	150023	261368	1986742	3	neg	180	2	0	2	<=	0.03	S	S	<=	0.03	S	<=	0.06	S	<=	0.06	S	S	<=	0.5	S	S	<=	0.5	S	neg	=	0.06	S	=	0.06	S	<=	1	S	<=	2	S	neg	neg
20154270	58	19to64	SAMN05221879	25	291514	469619	1996373	8	neg	1480	3	5	5	<=	0.03	S	S	<=	0.03	S	<=	0.06	S	<=	0.06	S	S	<=	0.5	S	S	<=	0.5	S	neg	=	0.06	S	=	0.06	S	<=	1	S	<=	2	S	neg	neg
20154271	57	19to64	SAMN05221880	26	185320	674002	2001337	8	neg	1480	3	5	5	<=	0.03	S	S	<=	0.03	S	<=	0.06	S	<=	0.06	S	S	<=	0.5	S	S	<=	0.5	S	neg	=	0.06	S	=	0.06	S	<=	1	S	<=	2	S	neg	neg
20154272	49	19to64	SAMN05221881	33	188023	297616	1985535	3	neg	180	2	0	2	<=	0.03	S	S	<=	0.03	S	<=	0.06	S	<=	0.06	S	S	<=	0.5	S	S	<=	0.5	S	neg	=	0.06	S	=	0.06	S	<=	1	S	<=	2	S	neg	neg
20154273	61	19to64	SAMN05221882	56	123509	298374	2061986	22F	neg	7314	1	2	2	<=	0.03	S	S	<=	0.03	S	<=	0.06	S	<=	0.06	S	S	<=	0.5	S	S	<=	0.5	S	MEF	=	8	R	=	0.06	S	<=	1	S	<=	2	S	neg	neg
20154274	10	5to18	SAMN05221883	68	60231	158638	2017650	7F	2	191	2	0	2	<=	0.03	S	S	<=	0.03	S	<=	0.06	S	<=	0.06	S	S	<=	0.5	S	S	<=	0.5	S	neg	=	0.06	S	=	0.06	S	<=	1	S	<=	2	S	neg	neg
20154275	84	>65	SAMN05221884	85	105813	224878	2134538	6C	1	146	23	0	3	<=	0.03	S	S	<=	0.03	S	<=	0.06	S	<=	0.06	S	S	<=	0.5	S	S	<=	0.5	S	neg	=	0.06	S	=	0.06	S	<=	1	S	<=	2	S	neg	FOLP_169-ins
20154276	89	>65	SAMN05221885	34	173568	503301	2110043	15A	neg	9692	76	0	2	<=	0.03	S	S	<=	0.03	S	<=	0.06	S	<=	0.06	S	S	<=	0.5	S	S	<=	0.5	S	MEF	=	8	R	=	0.06	S	<=	1	S	<=	2	S	neg	neg
20154278	56	19to64	SAMN05221887	53	126246	376523	2046897	19A	1:2	320	13	11	16	=	4	R	I	=	8	R	=	1	R	=	2	R	I	=	2	R	I	>	2	R	ERMB:MEF	>	32	R	>	2	R	<=	1	S	<=	2	S	pos	FOLA-Q1Y,Q11H,E14D,I20L:FOLP_195-ins
20154279	90	>65	SAMN05221888	28	198848	468286	1997463	8	neg	1480	3	5	5	<=	0.03	S	S	<=	0.03	S	<=	0.06	S	<=	0.06	S	S	<=	0.5	S	S	<=	0.5	S	neg	=	0.06	S	=	0.06	S	<=	1	S	<=	2	S	neg	neg
20154280	46	19to64	SAMN05221889	30	197635	469658	2002851	8	neg	1480	3	5	5	<=	0.03	S	S	<=	0.03	S	<=	0.06	S	<=	0.06	S	S	<=	0.5	S	S	<=	0.5	S	neg	=	0.06	S	=	0.06	S	<=	1	S	<=	2	S	neg	neg
20154281	41	19to64	SAMN05221890	31	199317	559727	2003736	8	neg	1480	3	5	5	<=	0.03	S	S	<=	0.03	S	<=	0.06	S	<=	0.06	S	S	<=	0.5	S	S	<=	0.5	S	neg	=	0.06	S	=	0.06	S	<=	1	S	<=	2	S	neg	neg
20154282	83	>65	SAMN05221891	37	136293	332702	2073985	10A	neg	97	0	0	2	<=	0.03	S	S	<=	0.03	S	<=	0.06	S	<=	0.06	S	S	<=	0.5	S	S	<=	0.5	S	neg	=	0.06	S	=	0.06	S	<=	1	S	<=	2	S	neg	neg
20154283	63	19to64	SAMN05221892	81	76730	263773	2136574	38	neg	393	2	4	0	<=	0.03	S	S	<=	0.03	S	<=	0.06	S	<=	0.06	S	S	<=	0.5	S	S	<=	0.5	S	neg	=	0.06	S	=	0.06	S	<=	1	S	<=	2	S	neg	neg
20154284	58	19to64	SAMN05221893	28	198094	313737	1983734	3	neg	180	2	0	2	<=	0.03	S	S	<=	0.03	S	<=	0.06	S	<=	0.06	S	S	<=	0.5	S	S	<=	0.5	S	neg	=	0.06	S	=	0.06	S	<=	1	S	<=	2	S	neg	neg
20154285	49	19to64	SAMN05221894	31	188660	342510	2046732	9N	neg	66	1	0	0	<=	0.03	S	S	<=	0.03	S	<=	0.06	S	<=	0.06	S	S	<=	0.5	S	S	<=	0.5	S	neg	=	0.06	S	=	0.06	S	<=	1	S	<=	2	S	neg	neg
20154286	78	>65	SAMN05221895	20	605067	624737	2061172	33F	neg	100	2	0	9	=	0.06	S	S	=	0.06	S	<=	0.06	S	<=	0.06	S	S	<=	0.5	S	S	<=	0.5	S	MEF	=	8	R	=	0.06	S	<=	1	S	<=	2	S	neg	FOLP_189-ins
20154287	62	19to64	SAMN05221896	93	52609	187658	2188597	38	neg	393	77	4	0	<=	0.03	S	S	<=	0.03	S	<=	0.06	S	<=	0.06	S	S	<=	0.5	S	S	<=	0.5	S	neg	=	0.06	S	=	0.06	S	<=	1	S	<=	2	S	neg	neg
20154327	72	>65	SAMN05221897	68	78092	160471	2111615	22F	neg	433	1	2	2	<=	0.03	S	S	<=	0.03	S	<=	0.06	S	<=	0.06	S	S	<=	0.5	S	S	<=	0.5	S	neg	=	0.06	S	=	0.06	S	<=	1	S	<=	2	S	neg	neg
20154328	63	19to64	SAMN05221898	52	109402	178403	2091049	17F	neg	392	11	0	0	<=	0.03	S	S	<=	0.03	S	<=	0.06	S	<=	0.06	S	S	<=	0.5	S	S	<=	0.5	S	neg	=	0.06	S	=	0.06	S	<=	1	S	<=	2	S	neg	neg
20154329	49	19to64	SAMN05221899	47	112308	213470	2015506	12F	neg	218	0	0	0	<=	0.03	S	S	<=	0.03	S	<=	0.06	S	<=	0.06	S	S	<=	0.5	S	S	<=	0.5	S	MEF	=	8	R	=	0.06	S	<=	1	S	<=	2	S	neg	neg
20154330	55	19to64	SAMN05221900	49	104271	262196	2012003	9N	neg	4666	23	0	0	<=	0.03	S	S	<=	0.03	S	<=	0.06	S	<=	0.06	S	S	<=	0.5	S	S	<=	0.5	S	neg	=	0.06	S	=	0.06	S	<=	1	S	<=	2	S	neg	neg
20154331	33	19to64	SAMN05221901	36	168423	282407	1984575	3	neg	180	2	0	2	<=	0.03	S	S	<=	0.03	S	<=	0.06	S	<=	0.06	S	S	<=	0.5	S	S	<=	0.5	S	neg	=	0.06	S	=	0.06	S	<=	1	S	<=	2	S	neg	neg
20154332	66	>65	SAMN05221902	74	69678	174618	2018109	7F	2	191	2	0	2	<=	0.03	S	S	<=	0.03	S	<=	0.06	S	<=	0.06	S	S	<=	0.5	S	S	<=	0.5	S	neg	=	0.06	S	=	0.06	S	<=	1	S	<=	2	S	neg	neg
20154333	50	19to64	SAMN05221903	44	232655	347703	2114594	34	neg	547	0	0	2	<=	0.03	S	S	<=	0.03	S	<=	0.06	S	<=	0.06	S	S	<=	0.5	S	S	<=	0.5	S	neg	=	0.06	S	=	0.06	S	<=	1	S	<=	2	S	neg	neg
20154335	67	>65	SAMN05221905	60	111615	203169	2094076	7C	neg	1797	2	4	6	<=	0.03	S	S	<=	0.03	S	<=	0.06	S	<=	0.06	S	S	<=	0.5	S	S	<=	0.5	S	MEF	=	8	R	=	0.06	S	<=	1	S	<=	2	S	neg	neg
20154336	48	19to64	SAMN05221906	55	82129	184848	2088918	9N	neg	11265	1	0	0	<=	0.03	S	S	<=	0.03	S	<=	0.06	S	<=	0.06	S	S	<=	0.5	S	S	<=	0.5	S	neg	=	0.06	S	=	0.06	S	<=	1	S	<=	2	S	neg	neg
20154337	3	0-4	SAMN05221907	53	91114	283703	2120445	15A	neg	2186	76	0	2	<=	0.03	S	S	<=	0.03	S	<=	0.06	S	<=	0.06	S	S	<=	0.5	S	S	<=	0.5	S	neg	=	0.06	S	=	0.06	S	<=	1	S	<=	2	S	neg	FOLP_180-ins
20154338	30	19to64	SAMN05221908	31	185384	347806	1980637	3	neg	180	2	0	2	<=	0.03	S	S	<=	0.03	S	<=	0.06	S	<=	0.06	S	S	<=	0.5	S	S	<=	0.5	S	neg	=	0.06	S	=	0.06	S	<=	1	S	<=	2	S	neg	neg
20154339	59	19to64	SAMN05221909	114	35070	143253	2153615	38	neg	393	2	4	4	<=	0.03	S	S	<=	0.03	S	<=	0.06	S	<=	0.06	S	S	<=	0.5	S	S	<=	0.5	S	neg	=	0.06	S	=	0.06	S	<=	1	S	<=	2	S	neg	neg
20154340	51	19to64	SAMN05221910	59	87324	185219	2097518	16F	neg	3157	0	0	3	<=	0.03	S	S	<=	0.03	S	<=	0.06	S	<=	0.06	S	S	<=	0.5	S	S	<=	0.5	S	neg	=	0.06	S	=	0.06	S	<=	1	S	<=	2	S	neg	neg
20154341	66	>65	SAMN05221911	31	130295	270373	1997151	3	neg	11266	2	NF	2	<=	0.03	S	S	<=	0.03	S	<=	0.06	S	<=	0.06	S	S	<=	0.5	S	S	<=	0.5	S	neg	=	0.06	S	=	0.06	S	<=	1	S	<=	2	S	neg	neg
20154342	79	>65	SAMN05221912	51	66818	176721	2077454	22F	neg	433	1	2	2	<=	0.03	S	S	<=	0.03	S	<=	0.06	S	<=	0.06	S	S	<=	0.5	S	S	<=	0.5	S	neg	=	0.06	S	=	0.06	S	<=	1	S	<=	2	S	neg	neg
20154343	47	19to64	SAMN05221913	119	57659	249901	2002235	8	neg	1268	3	5	5	<=	0.03	S	S	<=	0.03	S	<=	0.06	S	<=	0.06	S	S	<=	0.5	S	S	<=	0.5	S	neg	=	0.06	S	=	0.06	S	<=	1	S	<=	2	S	neg	neg
20154344	58	19to64	SAMN05221914	36	187979	261416	1978314	3	neg	180	2	0	2	<=	0.03	S	S	<=	0.03	S	<=	0.06	S	<=	0.06	S	S	<=	0.5	S	S	<=	0.5	S	neg	=	0.06	S	=	0.06	S	<=	1	S	<=	2	S	neg	neg
20154345	81	>65	SAMN05221915	29	308561	599295	1993974	3	neg	180	2	3	2	<=	0.03	S	S	<=	0.03	S	<=	0.06	S	<=	0.06	S	S	<=	0.5	S	S	<=	0.5	S	neg	=	0.06	S	=	0.06	S	<=	1	S	<=	2	S	neg	neg
20154346	66	>65	SAMN05221916	63	95455	296623	2116845	23A	neg	338	0	1	1	=	0.25	R	S	=	0.06	S	<=	0.06	S	=	0.12	S	S	<=	0.5	S	S	<=	0.5	S	neg	=	0.06	S	=	0.06	S	<=	1	S	<=	2	S	neg	FOLA-I20L
20154347	43	19to64	SAMN05221917	55	92182	383589	2078497	9N	neg	405	23	0	0	<=	0.03	S	S	<=	0.03	S	<=	0.06	S	<=	0.06	S	S	<=	0.5	S	S	<=	0.5	S	neg	=	0.06	S	=	0.06	S	<=	1	S	<=	2	S	neg	neg
20154348	41	19to64	SAMN05221918	26	168635	360761	2000508	8	neg	1480	3	5	5	<=	0.03	S	S	<=	0.03	S	<=	0.06	S	<=	0.06	S	S	<=	0.5	S	S	<=	0.5	S	neg	=	0.06	S	=	0.06	S	<=	1	S	<=	2	S	neg	neg
20154349	88	>65	SAMN05221919	47	96855	207564	2018754	12F	neg	3522	0	0	2	<=	0.03	S	S	<=	0.03	S	<=	0.06	S	<=	0.06	S	S	<=	0.5	S	S	<=	0.5	S	neg	=	0.06	S	=	0.06	S	<=	1	S	<=	2	S	neg	neg
20154350	90	>65	SAMN05221920	83	48103	154090	2027137	35B	1	558	4	7	7	=	2	R	S	=	4	I	=	0.5	I	=	1	I	S	=	1	I	S	>	2	R	MEF	=	8	R	=	0.06	S	<=	1	S	<=	2	S	neg	neg
20154351	60	19to64	SAMN05221921	30	213704	312134	2075275	33F	neg	2705	2	0	6	<=	0.03	S	S	<=	0.03	S	<=	0.06	S	<=	0.06	S	S	<=	0.5	S	S	<=	0.5	S	MEF	=	8	R	=	0.06	S	<=	1	S	<=	2	S	neg	FOLP_189-ins
20154353	55	19to64	SAMN05221922	58	80195	186122	2098459	9N	neg	632	1	0	0	<=	0.03	S	S	<=	0.03	S	<=	0.06	S	<=	0.06	S	S	<=	0.5	S	S	<=	0.5	S	neg	=	0.06	S	=	0.06	S	<=	1	S	<=	2	S	neg	neg
20154354	63	19to64	SAMN05221923	31	198086	383598	1982671	3	neg	180	2	0	2	<=	0.03	S	S	<=	0.03	S	<=	0.06	S	<=	0.06	S	S	<=	0.5	S	S	<=	0.5	S	neg	=	0.06	S	=	0.06	S	<=	1	S	<=	2	S	neg	neg
20154355	54	19to64	SAMN05221924	79	59510	153235	2010728	7F	2	191	2	0	2	<=	0.03	S	S	<=	0.03	S	<=	0.06	S	<=	0.06	S	S	<=	0.5	S	S	<=	0.5	S	neg	=	0.06	S	=	0.06	S	<=	1	S	<=	2	S	neg	neg
20154356	61	19to64	SAMN05221925	54	87027	261587	2079324	22F	neg	433	1	2	2	<=	0.03	S	S	<=	0.03	S	<=	0.06	S	<=	0.06	S	S	<=	0.5	S	S	<=	0.5	S	neg	=	0.06	S	=	0.06	S	<=	1	S	<=	2	S	neg	neg
20154357	61	19to64	SAMN05221926	56	79513	183274	2096149	15A	1	3811	1	0	0	<=	0.03	S	S	<=	0.03	S	<=	0.06	S	<=	0.06	S	S	<=	0.5	S	S	<=	0.5	S	neg	=	0.06	S	=	0.06	S	<=	1	S	<=	2	S	neg	neg
20154358	86	>65	SAMN05221927	50	102633	252085	2061775	22F	neg	7314	1	2	2	<=	0.03	S	S	<=	0.03	S	<=	0.06	S	<=	0.06	S	S	<=	0.5	S	S	<=	0.5	S	MEF	=	8	R	=	0.06	S	<=	1	S	<=	2	S	neg	neg
20154359	79	>65	SAMN05221928	72	61123	147274	2029764	11A	2	62	2	6	0	<=	0.03	S	S	<=	0.03	S	<=	0.06	S	<=	0.06	S	S	<=	0.5	S	S	<=	0.5	S	neg	=	0.06	S	=	0.06	S	<=	1	S	<=	2	S	neg	neg
20154360	54	19to64	SAMN05221929	39	111666	291618	2135595	23A	neg	438	2	0	6	<=	0.03	S	S	<=	0.03	S	<=	0.06	S	<=	0.06	S	S	<=	0.5	S	S	<=	0.5	S	neg	=	0.06	S	=	0.06	S	<=	1	S	<=	2	S	neg	neg
20154361	66	>65	SAMN05221930	398	28034	68273	2082468	11A	2	62	2	6	0	<=	0.03	S	S	<=	0.03	S	<=	0.06	S	<=	0.06	S	S	<=	0.5	S	S	<=	0.5	S	MEF	=	8	R	=	0.06	S	<=	1	S	<=	2	S	neg	neg
20154362	0	0-4	SAMN05221931	27	164974	563793	2034298	23B	neg	10522	2	0	120	<=	0.03	S	S	<=	0.03	S	<=	0.06	S	<=	0.06	S	S	<=	0.5	S	S	<=	0.5	S	neg	=	0.06	S	=	0.06	S	<=	1	S	<=	2	S	neg	neg
20154363	60	19to64	SAMN05221932	47	104855	333657	2061297	11A	2	62	2	6	0	<=	0.03	S	S	<=	0.03	S	<=	0.06	S	<=	0.06	S	S	<=	0.5	S	S	<=	0.5	S	MEF	=	8	R	=	0.06	S	<=	1	S	<=	2	S	neg	neg
20154364	82	>65	SAMN05221933	94	61177	138720	2195436	6C	neg	386	2	53	77	=	0.12	R	S	=	0.12	S	<=	0.06	S	<=	0.06	S	S	<=	0.5	S	S	<=	0.5	S	ERMB	>	32	R	>	2	R	<=	1	S	<=	2	S	pos	neg
20154365	62	19to64	SAMN05221934	93	54689	129679	2163753	19A	1	695	8	0	11	=	0.12	R	S	=	0.06	S	<=	0.06	S	<=	0.06	S	S	<=	0.5	S	S	<=	0.5	S	neg	=	0.06	S	=	0.06	S	<=	1	S	<=	2	S	neg	neg
20154366	46	19to64	SAMN05221935	54	85152	184902	2011935	11A	2	62	2	6	0	<=	0.03	S	S	<=	0.03	S	<=	0.06	S	<=	0.06	S	S	<=	0.5	S	S	<=	0.5	S	neg	=	0.06	S	=	0.06	S	<=	1	S	<=	2	S	neg	neg
20154367	88	>65	SAMN05221936	93	43746	152232	2055817	19A	1:2	320	13	14	144	=	8	R	R	=	8	R	=	1	R	=	4	R	R	=	4	R	R	>	2	R	ERMB:MEF	>	32	R	>	2	R	<=	1	S	<=	2	S	pos	FOLA-Q1Y,Q11H,E14D,I20L:FOLP_195-ins
20154368	82	>65	SAMN05221937	58	70933	152649	1989895	12F	neg	220	0	0	17	<=	0.03	S	S	<=	0.03	S	<=	0.06	S	<=	0.06	S	S	<=	0.5	S	S	<=	0.5	S	neg	=	0.06	S	=	0.06	S	<=	1	S	<=	2	S	neg	neg
20154369	55	19to64	SAMN05221938	63	122287	277247	2134446	19A	neg	2062	16	13	19	=	0.25	R	S	=	0.25	S	<=	0.06	S	=	0.12	S	S	<=	0.5	S	S	<=	0.5	S	neg	=	0.06	S	=	0.06	S	<=	1	S	<=	2	S	neg	FOLA-Q1Y,N16H,I20L:FOLP_169-ins
20154370	61	19to64	SAMN05221939	34	112170	603339	2054373	33F	neg	100	2	0	6	<=	0.03	S	S	<=	0.03	S	<=	0.06	S	<=	0.06	S	S	<=	0.5	S	S	<=	0.5	S	MEF	=	8	R	=	0.06	S	<=	1	S	<=	2	S	neg	FOLP_189-ins
20154371	67	>65	SAMN05221940	44	107785	183088	2105292	20	neg	235	1	4	2	<=	0.03	S	S	<=	0.03	S	<=	0.06	S	<=	0.06	S	S	<=	0.5	S	S	<=	0.5	S	neg	=	0.06	S	=	0.06	S	<=	1	S	<=	2	S	neg	neg
20154372	72	>65	SAMN05221941	44	111998	195406	2111942	15B	1	3280	7	8	9	=	0.25	R	S	=	0.5	S	=	0.12	S	=	0.12	S	S	<=	0.5	S	S	<=	0.5	S	MEF	=	8	R	=	0.06	S	<=	1	S	<=	2	S	neg	FOLA-Q1Y,Q11H,E14D,I20L:FOLP_177-ins
20154373	91	>65	SAMN05221942	43	78866	239705	2099898	11A	1	166	15	11	16	=	4	R	I	=	8	R	=	1	R	=	2	R	I	=	1	I	S	>	2	R	ERMB:ERMBUP	>	32	R	>	2	R	<=	1	S	<=	2	S	pos	FOLA-I20L:FOLP_178-ins
20154374	55	19to64	SAMN05221943	47	123507	202451	2122297	23B	neg	13484	0	0	0	<=	0.03	S	S	<=	0.03	S	<=	0.06	S	<=	0.06	S	S	<=	0.5	S	S	<=	0.5	S	MEF	=	8	R	=	0.06	S	<=	1	S	<=	2	S	neg	neg
20154437	72	>65	SAMN05221944	48	98827	298536	2061774	22F	neg	7314	1	2	2	<=	0.03	S	S	<=	0.03	S	<=	0.06	S	<=	0.06	S	S	<=	0.5	S	S	<=	0.5	S	MEF	=	8	R	=	0.06	S	<=	1	S	<=	2	S	neg	neg
20154438	37	19to64	SAMN05221945	54	84745	152538	2025248	12F	neg	220	0	0	2	<=	0.03	S	S	<=	0.03	S	<=	0.06	S	<=	0.06	S	S	<=	0.5	S	S	<=	0.5	S	neg	=	0.06	S	=	0.06	S	<=	1	S	<=	2	S	neg	neg
20154441	70	>65	SAMN05221946	55	107534	287231	2098574	20	neg	235	1	4	2	<=	0.03	S	S	<=	0.03	S	<=	0.06	S	<=	0.06	S	S	<=	0.5	S	S	<=	0.5	S	neg	=	0.06	S	=	0.06	S	<=	1	S	<=	2	S	neg	neg
20154442	38	19to64	SAMN05221947	19	618606	835744	2016200	3	neg	180	2	3	2	<=	0.03	S	S	<=	0.03	S	<=	0.06	S	<=	0.06	S	S	<=	0.5	S	S	<=	0.5	S	neg	=	0.06	S	=	0.06	S	<=	1	S	<=	2	S	neg	neg
20154443	66	>65	SAMN05221948	53	103339	316661	2079510	15A	neg	1191	24	27	28	=	0.25	R	S	<=	0.03	S	<=	0.06	S	=	0.12	S	S	<=	0.5	S	S	<=	0.5	S	ERMB	>	32	R	>	2	R	<=	1	S	<=	2	S	pos	FOLP_189-ins
20154444	62	19to64	SAMN05221949	54	101743	224590	2108767	20	neg	235	1	4	2	<=	0.03	S	S	<=	0.03	S	<=	0.06	S	<=	0.06	S	S	<=	0.5	S	S	<=	0.5	S	neg	=	0.06	S	=	0.06	S	<=	1	S	<=	2	S	neg	neg
20154446	56	19to64	SAMN05221950	76	56423	140344	2097675	9N	neg	1257	1	4	2	<=	0.03	S	S	<=	0.03	S	<=	0.06	S	<=	0.06	S	S	<=	0.5	S	S	<=	0.5	S	neg	=	0.06	S	=	0.06	S	<=	1	S	<=	2	S	neg	neg
20154447	59	19to64	SAMN05221951	35	150376	207224	1980226	12F	neg	220	0	0	2	<=	0.03	S	S	<=	0.03	S	<=	0.06	S	<=	0.06	S	S	<=	0.5	S	S	<=	0.5	S	neg	=	0.06	S	=	0.06	S	<=	1	S	<=	2	S	neg	neg
20154448	93	>65	SAMN05221952	63	65386	109671	2079500	22F	neg	433	1	2	27	<=	0.03	S	S	<=	0.03	S	<=	0.06	S	<=	0.06	S	S	<=	0.5	S	S	<=	0.5	S	neg	=	0.06	S	=	0.06	S	<=	1	S	<=	2	S	neg	neg
20154449	80	>65	SAMN05221953	48	118341	269210	2073120	15B	neg	199	2	0	2	<=	0.03	S	S	<=	0.03	S	<=	0.06	S	<=	0.06	S	S	<=	0.5	S	S	<=	0.5	S	neg	=	0.06	S	=	0.06	S	<=	1	S	<=	2	S	neg	neg
20154450	80	>65	SAMN05221954	100	44613	93067	2121102	19F	neg	654	2	0	0	<=	0.03	S	S	<=	0.03	S	<=	0.06	S	<=	0.06	S	S	<=	0.5	S	S	<=	0.5	S	neg	=	0.06	S	=	0.06	S	<=	1	S	<=	2	S	neg	neg
20154451	71	>65	SAMN05221955	60	123347	233169	2097123	16F	neg	11267	2	6	2	<=	0.03	S	S	<=	0.03	S	<=	0.06	S	<=	0.06	S	S	<=	0.5	S	S	<=	0.5	S	neg	=	0.06	S	=	0.06	S	<=	1	S	<=	2	S	neg	FOLP_189-ins
20154452	50	19to64	SAMN05221956	49	85882	207384	1988680	12F	neg	220	0	0	2	<=	0.03	S	S	<=	0.03	S	<=	0.06	S	<=	0.06	S	S	<=	0.5	S	S	<=	0.5	S	neg	=	0.06	S	=	0.06	S	<=	1	S	<=	2	S	neg	neg
20154453	43	19to64	SAMN05221957	101	50675	138785	2099394	7C	neg	1797	2	4	6	<=	0.03	S	S	<=	0.03	S	<=	0.06	S	<=	0.06	S	S	<=	0.5	S	S	<=	0.5	S	neg	=	0.06	S	=	0.06	S	<=	1	S	<=	2	S	neg	neg
20154454	43	19to64	SAMN05221958	56	69287	259143	2083258	22F	neg	433	1	2	59	<=	0.03	S	S	<=	0.03	S	<=	0.06	S	<=	0.06	S	S	<=	0.5	S	S	<=	0.5	S	MEF	=	8	R	=	0.06	S	<=	1	S	<=	2	S	neg	neg
20154455	72	>65	SAMN05221959	32	192874	287317	2050587	3	neg	180	2	0	111	=	0.06	S	S	=	0.06	S	<=	0.06	S	=	0.25	S	S	<=	0.5	S	S	=	1	I	ERMB	>	32	R	>	2	R	<=	1	S	<=	2	S	pos	neg
20154456	32	19to64	SAMN05221960	143	63508	238628	2109493	15B	1	7479	7	8	9	=	0.25	R	S	=	0.5	S	=	0.12	S	=	0.12	S	S	<=	0.5	S	S	<=	0.5	S	MEF	=	8	R	=	0.06	S	<=	1	S	<=	2	S	neg	FOLP_177-ins:FOLP_180-ins
20154457	38	19to64	SAMN05221961	76	80993	161609	2024777	35B	1	558	4	7	7	=	2	R	S	=	4	I	=	0.5	I	=	1	I	S	=	1	I	S	>	2	R	neg	=	0.06	S	=	0.06	S	<=	1	S	<=	2	S	neg	FOLP_173-ins
20154458	63	19to64	SAMN05221962	64	67052	166947	2113136	11A	1	166	15	12	18	=	2	R	S	=	2	S	=	0.5	I	=	1	I	S	=	1	I	S	>	2	R	ERMB:ERMBUP	>	32	R	>	2	R	<=	1	S	<=	2	S	pos	FOLA-I20L:FOLP_178-ins
20154459	76	>65	SAMN05221963	61	77450	298600	2063229	22F	neg	7314	1	2	2	<=	0.03	S	S	<=	0.03	S	<=	0.06	S	<=	0.06	S	S	<=	0.5	S	S	<=	0.5	S	MEF	=	8	R	=	0.06	S	<=	1	S	<=	2	S	neg	neg
20154460	52	19to64	SAMN05221964	38	129012	399851	2059654	16F	neg	659	9	0	3	<=	0.03	S	S	<=	0.03	S	<=	0.06	S	<=	0.06	S	S	<=	0.5	S	S	<=	0.5	S	neg	=	0.06	S	=	0.06	S	<=	1	S	<=	2	S	neg	neg
20154461	80	>65	SAMN05221965	49	163260	353474	2111999	15B	1	3280	7	8	9	=	0.25	R	S	=	0.5	S	=	0.12	S	=	0.12	S	S	<=	0.5	S	S	<=	0.5	S	MEF	=	8	R	=	0.06	S	<=	1	S	<=	2	S	neg	FOLP_177-ins
20154462	49	19to64	SAMN05221966	60	69371	225719	2062057	22F	neg	7314	1	2	2	<=	0.03	S	S	<=	0.03	S	<=	0.06	S	<=	0.06	S	S	<=	0.5	S	S	<=	0.5	S	MEF	=	8	R	=	0.06	S	<=	1	S	<=	2	S	neg	neg
20154463	64	19to64	SAMN05221967	60	77377	213152	2117427	22F	neg	433	1	2	2	<=	0.03	S	S	<=	0.03	S	<=	0.06	S	<=	0.06	S	S	<=	0.5	S	S	<=	0.5	S	neg	=	0.06	S	=	0.06	S	<=	1	S	<=	2	S	neg	neg
20154464	55	19to64	SAMN05221968	42	134776	524894	2115625	34	neg	11268	0	0	2	<=	0.03	S	S	<=	0.03	S	<=	0.06	S	<=	0.06	S	S	<=	0.5	S	S	<=	0.5	S	neg	=	0.06	S	=	0.06	S	<=	1	S	<=	2	S	neg	neg
20154465	43	19to64	SAMN05221969	57	72451	240910	2037337	19A	2	320	13	11	16	=	4	R	I	=	8	R	=	1	R	=	2	R	I	=	2	R	I	>	2	R	ERMB:MEF	>	32	R	>	2	R	<=	1	S	<=	2	S	pos	FOLA-Q1Y,Q11H,E14D,I20L:FOLP_195-ins
20154466	58	19to64	SAMN05221970	52	85939	260755	2108190	34	neg	547	0	0	2	<=	0.03	S	S	<=	0.03	S	<=	0.06	S	<=	0.06	S	S	<=	0.5	S	S	<=	0.5	S	neg	=	0.06	S	=	0.06	S	<=	1	S	<=	2	S	neg	neg
20154467	54	19to64	SAMN05221971	48	98367	317077	2061818	22F	neg	7314	1	2	2	<=	0.03	S	S	<=	0.03	S	<=	0.06	S	<=	0.06	S	S	<=	0.5	S	S	<=	0.5	S	MEF	=	8	R	=	0.06	S	<=	1	S	<=	2	S	neg	neg
20154468	1	0-4	SAMN05221972	30	130980	450750	2062171	33F	neg	2705	2	0	6	<=	0.03	S	S	<=	0.03	S	<=	0.06	S	<=	0.06	S	S	<=	0.5	S	S	<=	0.5	S	MEF	=	8	R	=	0.06	S	<=	1	S	<=	2	S	neg	FOLP_189-ins
20154469	57	19to64	SAMN05221973	26	185144	469686	2001284	8	neg	1480	3	5	5	<=	0.03	S	S	<=	0.03	S	<=	0.06	S	<=	0.06	S	S	<=	0.5	S	S	<=	0.5	S	neg	=	0.06	S	=	0.06	S	<=	1	S	<=	2	S	neg	neg
20154470	56	19to64	SAMN05221974	59	69332	192771	2076726	22F	neg	433	1	2	2	<=	0.03	S	S	<=	0.03	S	<=	0.06	S	<=	0.06	S	S	<=	0.5	S	S	<=	0.5	S	MEF	=	8	R	=	0.06	S	<=	1	S	<=	2	S	neg	neg
20154471	63	19to64	SAMN05221975	26	173602	610368	1995911	3	neg	180	2	3	2	<=	0.03	S	S	<=	0.03	S	<=	0.06	S	<=	0.06	S	S	<=	0.5	S	S	<=	0.5	S	neg	=	0.06	S	=	0.06	S	<=	1	S	<=	2	S	neg	neg
20154472	44	19to64	SAMN05221976	54	176292	300972	2115266	14	neg	13	27	36	8	=	4	R	I	=	8	R	=	1	R	=	1	I	S	=	2	R	I	>	2	R	MEF	=	8	R	=	0.06	S	<=	1	S	<=	2	S	neg	FOLA-Q1Y,E14D,I20L:FOLP_195-ins
20154473	63	19to64	SAMN05221977	88	55815	220194	2191823	6C	1	1092	6	7	8	=	0.5	R	S	=	1	S	=	0.25	S	=	0.5	S	S	<=	0.5	S	S	=	2	R	neg	=	0.06	S	=	0.06	S	<=	1	S	<=	2	S	neg	FOLA-Q1H,V3I,E14D,I20L:FOLP_195-ins
20154474	78	>65	SAMN05221978	51	101357	297016	2066103	23A	neg	338	0	1	1	=	0.25	R	S	=	0.06	S	<=	0.06	S	=	0.12	S	S	<=	0.5	S	S	<=	0.5	S	neg	=	0.06	S	=	0.06	S	<=	1	S	<=	2	S	neg	neg
20154476	36	19to64	SAMN05221980	41	142821	277296	2016859	3	neg	180	2	3	2	<=	0.03	S	S	<=	0.03	S	<=	0.06	S	<=	0.06	S	S	<=	0.5	S	S	<=	0.5	S	neg	=	0.06	S	=	0.06	S	<=	1	S	<=	2	S	neg	neg
20154477	63	19to64	SAMN05221981	44	144669	261238	2050849	3	neg	180	2	0	111	=	0.06	S	S	=	0.06	S	<=	0.06	S	=	0.25	S	S	<=	0.5	S	S	=	1	I	ERMB	>	32	R	>	2	R	<=	1	S	<=	2	S	pos	neg
20154478	1	0-4	SAMN05221982	45	125839	417980	2110387	15C	1	3280	7	8	9	=	0.25	R	S	=	0.5	S	=	0.12	S	=	0.12	S	S	<=	0.5	S	S	<=	0.5	S	MEF	=	8	R	=	0.06	S	<=	1	S	<=	2	S	neg	FOLP_177-ins:FOLP_180-ins
20154480	62	19to64	SAMN05221983	56	93772	200530	2081744	7C	neg	11269	0	0	3	<=	0.03	S	S	<=	0.03	S	<=	0.06	S	<=	0.06	S	S	<=	0.5	S	S	<=	0.5	S	neg	=	0.06	S	=	0.06	S	<=	1	S	<=	2	S	neg	neg
20154481	86	>65	SAMN05221984	33	289495	437521	2120565	34	neg	547	0	0	2	<=	0.03	S	S	<=	0.03	S	<=	0.06	S	<=	0.06	S	S	<=	0.5	S	S	<=	0.5	S	neg	=	0.06	S	=	0.06	S	<=	1	S	<=	2	S	neg	neg
20154482	66	>65	SAMN05221985	56	91026	150855	2050921	19A	1:2	320	13	14	26	=	8	R	R	=	8	R	=	1	R	=	8	R	R	=	4	R	R	>	2	R	ERMB:MEF	>	32	R	>	2	R	<=	1	S	<=	2	S	pos	FOLA-Q1Y,Q11H,E14D,I20L:FOLP_195-ins
20154483	68	>65	SAMN05221986	98	63953	97904	2155162	34	neg	11270	2	87	142	=	0.12	R	S	=	0.12	S	<=	0.06	S	=	0.12	S	S	<=	0.5	S	S	<=	0.5	S	neg	=	0.06	S	=	0.06	S	<=	1	S	<=	2	S	neg	FOLA-I20L
20154484	68	>65	SAMN05221987	51	69161	298602	2062534	22F	neg	10163	1	2	2	<=	0.03	S	S	<=	0.03	S	<=	0.06	S	<=	0.06	S	S	<=	0.5	S	S	<=	0.5	S	MEF	=	8	R	=	0.06	S	<=	1	S	<=	2	S	neg	neg
20154485	75	>65	SAMN05221988	25	230506	365713	1994781	3	neg	180	2	3	2	<=	0.03	S	S	<=	0.03	S	<=	0.06	S	<=	0.06	S	S	<=	0.5	S	S	<=	0.5	S	neg	=	0.06	S	=	0.06	S	<=	1	S	<=	2	S	neg	neg
20154486	36	19to64	SAMN05221989	58	111183	212004	2069506	19F	1:2	271	13	11	33	=	4	R	I	=	8	R	=	1	R	=	8	R	R	=	4	R	R	>	2	R	ERMB:MEF	>	32	R	>	2	R	<=	1	S	<=	2	S	pos	FOLA-Q1Y,Q11H,E14D,I20L:FOLP_177-ins:FOLP_180-ins
20154487	52	19to64	SAMN05221990	53	192697	307772	2034430	3	neg	180	2	0	12	<=	0.03	S	S	<=	0.03	S	<=	0.06	S	<=	0.06	S	S	<=	0.5	S	S	<=	0.5	S	neg	=	0.06	S	=	0.06	S	<=	1	S	<=	2	S	neg	neg
20154488	62	19to64	SAMN05221991	29	289060	382608	1982651	3	neg	180	2	0	2	<=	0.03	S	S	<=	0.03	S	<=	0.06	S	<=	0.06	S	S	<=	0.5	S	S	<=	0.5	S	neg	=	0.06	S	=	0.06	S	<=	1	S	<=	2	S	neg	neg
20154489	84	>65	SAMN05221992	49	92283	165554	2026826	35B	1	7487	4	49	7	=	2	R	S	=	8	R	=	1	R	=	1	I	S	=	1	I	S	>	2	R	neg	=	0.06	S	=	0.06	S	<=	1	S	<=	2	S	neg	neg
20154490	73	>65	SAMN05221993	44	137198	282836	2071977	35F	neg	498	0	0	3	<=	0.03	S	S	<=	0.03	S	<=	0.06	S	<=	0.06	S	S	<=	0.5	S	S	<=	0.5	S	neg	=	0.06	S	=	0.06	S	<=	1	S	<=	2	S	neg	neg
20154491	64	19to64	SAMN05221994	35	116536	196089	2008262	11A	neg	62	2	6	10	<=	0.03	S	S	<=	0.03	S	<=	0.06	S	<=	0.06	S	S	<=	0.5	S	S	<=	0.5	S	neg	=	0.06	S	=	0.06	S	<=	1	S	<=	2	S	neg	neg
20154492	97	>65	SAMN05221995	163	28515	76591	2191938	19A	neg	63	79	27	35	=	0.25	R	S	=	0.25	S	<=	0.06	S	=	0.25	S	S	<=	0.5	S	S	<=	0.5	S	ERMB	>	32	R	>	2	R	<=	1	S	<=	2	S	pos	neg
20154493	53	19to64	SAMN05221996	86	49265	157480	2122134	19F	2	654	2	0	0	<=	0.03	S	S	<=	0.03	S	<=	0.06	S	<=	0.06	S	S	<=	0.5	S	S	<=	0.5	S	neg	=	0.06	S	=	0.06	S	<=	1	S	<=	2	S	neg	neg
20154494	58	19to64	SAMN05221997	39	143110	382906	2074041	35F	neg	498	0	0	3	<=	0.03	S	S	<=	0.03	S	<=	0.06	S	<=	0.06	S	S	<=	0.5	S	S	<=	0.5	S	neg	=	0.06	S	=	0.06	S	<=	1	S	<=	2	S	neg	neg
20154495	89	>65	SAMN05221998	55	90726	252480	2025236	11A	2	62	2	6	0	<=	0.03	S	S	<=	0.03	S	<=	0.06	S	<=	0.06	S	S	<=	0.5	S	S	<=	0.5	S	neg	=	0.06	S	=	0.06	S	<=	1	S	<=	2	S	neg	neg
20154496	43	19to64	SAMN05221999	56	94180	318796	2110495	22F	neg	11271	1	2	2	<=	0.03	S	S	<=	0.03	S	<=	0.06	S	<=	0.06	S	S	<=	0.5	S	S	<=	0.5	S	neg	=	0.06	S	=	0.06	S	<=	1	S	<=	2	S	neg	neg
20154497	90	>65	SAMN05222000	49	71429	261559	2071054	35F	neg	11272	0	0	3	<=	0.03	S	S	<=	0.03	S	<=	0.06	S	<=	0.06	S	S	<=	0.5	S	S	<=	0.5	S	neg	=	0.06	S	=	0.06	S	<=	1	S	<=	2	S	neg	neg
20154498	67	>65	SAMN05222001	43	98555	172543	2083791	22F	neg	433	1	2	2	<=	0.03	S	S	<=	0.03	S	<=	0.06	S	<=	0.06	S	S	<=	0.5	S	S	<=	0.5	S	neg	=	0.06	S	=	0.06	S	<=	1	S	<=	2	S	neg	neg
20154499	56	19to64	SAMN05222002	82	78531	320632	2045077	19A	1:2	320	13	11	16	=	4	R	I	=	8	R	=	1	R	=	2	R	I	=	2	R	I	>	2	R	ERMB:MEF	>	32	R	>	2	R	<=	1	S	<=	2	S	pos	FOLA-Q1Y,Q11H,E14D,I20L:FOLP_195-ins
20154500	93	>65	SAMN05222003	58	79918	226845	2016985	9N	neg	4666	23	0	0	<=	0.03	S	S	<=	0.03	S	<=	0.06	S	<=	0.06	S	S	<=	0.5	S	S	<=	0.5	S	neg	=	0.06	S	=	0.06	S	<=	1	S	<=	2	S	neg	neg
20154501	50	19to64	SAMN05222004	53	98613	230749	2078244	22F	neg	433	1	2	2	<=	0.03	S	S	<=	0.03	S	<=	0.06	S	<=	0.06	S	S	<=	0.5	S	S	<=	0.5	S	neg	=	0.06	S	=	0.06	S	<=	1	S	<=	2	S	neg	neg
20154502	74	>65	SAMN05222005	38	117130	313667	1984374	3	neg	180	2	0	2	<=	0.03	S	S	<=	0.03	S	<=	0.06	S	<=	0.06	S	S	<=	0.5	S	S	<=	0.5	S	neg	=	0.06	S	=	0.06	S	<=	1	S	<=	2	S	neg	neg
20154503	86	>65	SAMN05222006	46	87036	300369	2049062	11A	2	62	2	6	0	<=	0.03	S	S	<=	0.03	S	<=	0.06	S	<=	0.06	S	S	<=	0.5	S	S	<=	0.5	S	neg	=	0.06	S	=	0.06	S	<=	1	S	<=	2	S	neg	neg
20154504	74	>65	SAMN05222007	58	104268	261668	2071711	10A	neg	816	0	0	2	<=	0.03	S	S	<=	0.03	S	<=	0.06	S	<=	0.06	S	S	<=	0.5	S	S	<=	0.5	S	neg	=	0.06	S	=	0.06	S	<=	1	S	<=	2	S	neg	neg
20154506	92	>65	SAMN05222008	71	69582	193659	2094871	7C	neg	1797	2	4	6	<=	0.03	S	S	<=	0.03	S	<=	0.06	S	<=	0.06	S	S	<=	0.5	S	S	<=	0.5	S	neg	=	0.06	S	=	0.06	S	<=	1	S	<=	2	S	neg	neg
20154507	63	19to64	SAMN05222009	86	58344	142819	2034876	31	neg	568	12	0	0	<=	0.03	S	S	<=	0.03	S	<=	0.06	S	<=	0.06	S	S	<=	0.5	S	S	<=	0.5	S	neg	=	0.06	S	=	0.06	S	<=	1	S	<=	2	S	neg	neg
20154508	5	5to18	SAMN05222010	47	132567	283901	2134787	21	neg	13507	0	0	2	<=	0.03	S	S	<=	0.03	S	<=	0.06	S	<=	0.06	S	S	<=	0.5	S	S	<=	0.5	S	neg	=	0.06	S	=	0.06	S	<=	1	S	<=	2	S	neg	neg
20154509	43	19to64	SAMN05222011	59	70557	286141	2126629	19A	neg	319	10	9	13	=	0.5	R	S	=	0.5	S	=	0.25	S	=	0.25	S	S	<=	0.5	S	S	<=	0.5	S	ERMB:ERMBUP	>	32	R	>	2	R	<=	1	S	<=	2	S	pos	FOLA-V3I,I20L:FOLP_180-ins
20154510	74	>65	SAMN05222012	47	117356	202495	2029908	3	neg	180	2	0	12	<=	0.03	S	S	<=	0.03	S	<=	0.06	S	<=	0.06	S	S	<=	0.5	S	S	<=	0.5	S	neg	=	0.06	S	=	0.06	S	<=	1	S	<=	2	S	neg	neg
20154511	80	>65	SAMN05222013	55	104422	288534	2137572	9N	neg	632	1	0	0	<=	0.03	S	S	<=	0.03	S	<=	0.06	S	<=	0.06	S	S	<=	0.5	S	S	<=	0.5	S	neg	=	0.06	S	=	0.06	S	<=	1	S	<=	2	S	neg	neg
20154512	52	19to64	SAMN05222014	78	70851	209045	2143300	12F	neg	989	12	4	3	<=	0.03	S	S	<=	0.03	S	<=	0.06	S	<=	0.06	S	S	<=	0.5	S	S	<=	0.5	S	neg	=	0.06	S	=	0.06	S	<=	1	S	<=	2	S	neg	FOLP_178-ins
20154513	55	19to64	SAMN05222015	30	216905	354949	1981067	3	neg	180	2	0	2	<=	0.03	S	S	<=	0.03	S	<=	0.06	S	<=	0.06	S	S	<=	0.5	S	S	<=	0.5	S	neg	=	0.06	S	=	0.06	S	<=	1	S	<=	2	S	neg	neg
20154514	86	>65	SAMN05222016	62	83732	231501	2177546	6C	1	1092	6	7	8	=	0.5	R	S	=	1	S	=	0.25	S	=	0.5	S	S	<=	0.5	S	S	=	2	R	ERMB	>	32	R	>	2	R	<=	1	S	<=	2	S	pos	FOLA-Q1H,V3I,E14D,I20L:FOLP_195-ins
20154515	78	>65	SAMN05222017	29	167635	297906	1995494	3	neg	180	2	3	2	<=	0.03	S	S	<=	0.03	S	<=	0.06	S	<=	0.06	S	S	<=	0.5	S	S	<=	0.5	S	neg	=	0.06	S	=	0.06	S	<=	1	S	<=	2	S	neg	neg
20154516	67	>65	SAMN05222018	64	114548	195592	2090019	15C	neg	199	2	0	2	<=	0.03	S	S	<=	0.03	S	<=	0.06	S	<=	0.06	S	S	<=	0.5	S	S	<=	0.5	S	neg	=	0.06	S	=	0.06	S	<=	1	S	<=	2	S	neg	neg
20154517	72	>65	SAMN05222019	71	59317	241774	2065827	22F	neg	433	1	2	2	<=	0.03	S	S	<=	0.03	S	<=	0.06	S	<=	0.06	S	S	<=	0.5	S	S	<=	0.5	S	MEF	=	8	R	=	0.06	S	<=	1	S	<=	2	S	neg	neg
20154518	91	>65	SAMN05222020	44	109303	261201	2075290	22F	neg	433	1	2	2	<=	0.03	S	S	<=	0.03	S	<=	0.06	S	<=	0.06	S	S	<=	0.5	S	S	<=	0.5	S	neg	=	0.06	S	=	0.06	S	<=	1	S	<=	2	S	neg	neg
20154519	64	19to64	SAMN05222021	62	67519	223159	2115840	23A	neg	338	0	1	1	=	0.25	R	S	=	0.06	S	<=	0.06	S	=	0.12	S	S	<=	0.5	S	S	<=	0.5	S	neg	=	0.06	S	=	0.06	S	<=	1	S	<=	2	S	neg	neg
20154520	57	19to64	SAMN05222022	31	177999	383366	2050756	3	neg	180	2	0	2	<=	0.03	S	S	<=	0.03	S	<=	0.06	S	<=	0.06	S	S	<=	0.5	S	S	<=	0.5	S	ERMB:ERMBS:ERMBUP	=	0.06	S	=	0.06	S	<=	1	S	<=	2	S	neg	neg
20154521	81	>65	SAMN05222023	60	81674	149850	2026143	11A	neg	62	2	6	10	<=	0.03	S	S	<=	0.03	S	<=	0.06	S	<=	0.06	S	S	<=	0.5	S	S	<=	0.5	S	neg	=	0.06	S	=	0.06	S	<=	1	S	<=	2	S	neg	neg
20154522	1	0-4	SAMN05222024	62	63317	210482	2118743	22F	neg	433	1	2	2	<=	0.03	S	S	<=	0.03	S	<=	0.06	S	<=	0.06	S	S	<=	0.5	S	S	<=	0.5	S	neg	=	0.06	S	=	0.06	S	<=	1	S	<=	2	S	neg	neg
20154523	49	19to64	SAMN05222025	63	93887	233823	2122762	15A	neg	1191	24	27	28	=	0.25	R	S	<=	0.03	S	<=	0.06	S	=	0.12	S	S	<=	0.5	S	S	<=	0.5	S	ERMB	>	32	R	>	2	R	<=	1	S	<=	2	S	pos	FOLP_189-ins
20154524	80	>65	SAMN05222026	44	92085	188571	2078154	22F	neg	433	1	88	2	<=	0.03	S	S	<=	0.03	S	<=	0.06	S	<=	0.06	S	S	<=	0.5	S	S	<=	0.5	S	neg	=	0.06	S	=	0.06	S	<=	1	S	<=	2	S	neg	neg
20154568	76	>65	SAMN05222027	32	177879	317692	2082027	23A	neg	338	19	1	24	=	0.5	R	S	=	0.25	S	<=	0.06	S	=	0.25	S	S	<=	0.5	S	S	<=	0.5	S	ERMB	>	32	R	>	2	R	<=	1	S	<=	2	S	pos	neg
20154569	22	19to64	SAMN05222028	53	72514	211695	2050513	19A	1:2	320	13	11	16	=	4	R	I	=	8	R	=	1	R	=	2	R	I	=	2	R	I	>	2	R	ERMB:MEF	>	32	R	>	2	R	<=	1	S	<=	2	S	pos	FOLA-Q1Y,Q11H,E14D,I20L:FOLP_195-ins
20154570	71	>65	SAMN05222029	50	121405	378521	2046998	19A	1:2	320	13	11	16	=	4	R	I	=	8	R	=	1	R	=	2	R	I	=	2	R	I	>	2	R	ERMB:MEF	>	32	R	>	2	R	<=	1	S	<=	2	S	pos	FOLA-Q1Y,Q11H,E14D,I20L:FOLP_195-ins
20154571	39	19to64	SAMN05222030	59	76333	245662	2099433	15A	1	3811	1	0	0	<=	0.03	S	S	<=	0.03	S	<=	0.06	S	<=	0.06	S	S	<=	0.5	S	S	<=	0.5	S	neg	=	0.06	S	=	0.06	S	<=	1	S	<=	2	S	neg	neg
20154572	68	>65	SAMN05222031	53	70121	215904	2080967	22F	neg	433	1	2	2	<=	0.03	S	S	<=	0.03	S	<=	0.06	S	<=	0.06	S	S	<=	0.5	S	S	<=	0.5	S	neg	=	0.06	S	=	0.06	S	<=	1	S	<=	2	S	neg	neg
20154573	0	0-4	SAMN05222032	54	102609	298521	2058290	22F	neg	7314	1	2	2	<=	0.03	S	S	<=	0.03	S	<=	0.06	S	<=	0.06	S	S	<=	0.5	S	S	<=	0.5	S	MEF	=	8	R	=	0.06	S	<=	1	S	<=	2	S	neg	neg
20154574	57	19to64	SAMN05222033	67	61739	153252	2117670	19F	2	654	2	0	0	<=	0.03	S	S	<=	0.03	S	<=	0.06	S	<=	0.06	S	S	<=	0.5	S	S	<=	0.5	S	neg	=	0.06	S	=	0.06	S	<=	1	S	<=	2	S	neg	neg
20154575	61	19to64	SAMN05222034	26	123755	329501	2015850	35B	1	558	4	7	7	=	2	R	S	=	4	I	=	0.5	I	=	1	I	S	=	1	I	S	>	2	R	MEF	=	8	R	=	0.06	S	<=	1	S	<=	2	S	neg	neg
20154576	49	19to64	SAMN05222035	49	105974	204593	2119882	6C	neg	1292	19	31	8	=	1	R	S	=	1	S	=	0.12	S	=	0.25	S	S	<=	0.5	S	S	=	2	R	MEF	=	8	R	=	0.06	S	<=	1	S	<=	2	S	neg	FOLA-Q1H,I20L:FOLP_173-ins
20154577	59	19to64	SAMN05222036	42	111889	191002	1987230	12F	neg	220	0	0	17	<=	0.03	S	S	<=	0.03	S	<=	0.06	S	<=	0.06	S	S	<=	0.5	S	S	<=	0.5	S	neg	=	0.06	S	=	0.06	S	<=	1	S	<=	2	S	neg	neg
20154578	54	19to64	SAMN05222037	45	108644	291342	2088938	17F	neg	392	11	0	0	<=	0.03	S	S	<=	0.03	S	<=	0.06	S	<=	0.06	S	S	<=	0.5	S	S	<=	0.5	S	neg	=	0.06	S	=	0.06	S	<=	1	S	<=	2	S	neg	neg
20154579	38	19to64	SAMN05222038	50	98557	203102	2061620	22F	neg	7314	1	2	2	<=	0.03	S	S	<=	0.03	S	<=	0.06	S	<=	0.06	S	S	<=	0.5	S	S	<=	0.5	S	MEF	=	8	R	=	0.06	S	<=	1	S	<=	2	S	neg	neg
20154580	25	19to64	SAMN05222039	76	51748	162234	2080515	19F	2	251	2	0	0	<=	0.03	S	S	<=	0.03	S	<=	0.06	S	<=	0.06	S	S	<=	0.5	S	S	<=	0.5	S	neg	=	0.06	S	=	0.06	S	<=	1	S	<=	2	S	neg	neg
20154581	7	5to18	SAMN05222040	66	66385	187085	1992066	12F	neg	220	0	0	17	<=	0.03	S	S	<=	0.03	S	<=	0.06	S	<=	0.06	S	S	<=	0.5	S	S	<=	0.5	S	neg	=	0.06	S	=	0.06	S	<=	1	S	<=	2	S	neg	neg
20154582	26	19to64	SAMN05222041	88	53206	187240	2123961	15A	neg	63	4	7	7	=	2	R	S	=	4	I	=	0.5	I	=	1	I	S	=	1	I	S	>	2	R	ERMB	>	32	R	>	2	R	<=	1	S	<=	2	S	pos	neg
20154583	71	>65	SAMN05222042	37	279991	439998	2076153	15A	neg	6011	0	4	23	<=	0.03	S	S	<=	0.03	S	<=	0.06	S	<=	0.06	S	S	<=	0.5	S	S	<=	0.5	S	ERMB:ERMBUP	>	32	R	>	2	R	<=	1	S	<=	2	S	pos	neg
20154584	70	>65	SAMN05222043	53	80823	190974	1986781	12F	neg	220	0	NF	17	<=	0.03	S	S	<=	0.03	S	<=	0.06	S	<=	0.06	S	S	<=	0.03	S	S	<=	0.5	S	neg	=	0.06	S	=	0.06	S	<=	1	S	<=	2	S	neg	neg
20154585	38	19to64	SAMN05222044	45	86922	180908	1982665	12F	neg	220	0	0	17	<=	0.03	S	S	<=	0.03	S	<=	0.06	S	<=	0.06	S	S	<=	0.5	S	S	<=	0.5	S	neg	=	0.06	S	=	0.06	S	<=	1	S	<=	2	S	neg	neg
20154586	38	19to64	SAMN05222045	62	67107	249268	2086533	15A	neg	63	24	27	143	=	0.5	R	S	=	0.25	S	=	0.12	S	=	0.5	S	S	=	1	I	S	=	2	R	ERMB	>	32	R	>	2	R	<=	1	S	<=	2	S	pos	neg
20154587	58	19to64	SAMN05222046	57	67131	209802	2062119	22F	neg	7314	1	2	2	<=	0.03	S	S	<=	0.03	S	<=	0.06	S	<=	0.06	S	S	<=	0.5	S	S	<=	0.5	S	MEF	=	8	R	=	0.06	S	<=	1	S	<=	2	S	neg	neg
20154589	57	19to64	SAMN05222048	33	100996	484668	2076542	33F	neg	2705	2	0	6	<=	0.03	S	S	<=	0.03	S	<=	0.06	S	<=	0.06	S	S	<=	0.5	S	S	<=	0.5	S	MEF	=	8	R	=	0.06	S	<=	1	S	<=	2	S	neg	FOLP_189-ins
20154663	ND	ND	SAMN05222049	44	140365	414362	2003116	8	neg	1480	3	5	5	<=	0.03	S	S	<=	0.03	S	<=	0.06	S	<=	0.06	S	S	<=	0.5	S	S	<=	0.5	S	neg	=	0.06	S	=	0.06	S	<=	1	S	<=	2	S	neg	neg
20154664	ND	ND	SAMN05222050	31	187994	263686	1983875	3	neg	180	2	0	2	<=	0.03	S	S	<=	0.03	S	<=	0.06	S	<=	0.06	S	S	<=	0.5	S	S	<=	0.5	S	neg	=	0.06	S	=	0.06	S	<=	1	S	<=	2	S	neg	neg
20154665	57	19to64	SAMN05222051	33	145221	469671	2003125	8	neg	1480	3	5	5	<=	0.03	S	S	<=	0.03	S	<=	0.06	S	<=	0.06	S	S	<=	0.5	S	S	<=	0.5	S	R23S1-A21G	>	32	R	=	1	R	<=	1	S	<=	2	S	pos	neg
20154666	76	>65	SAMN05222052	42	156337	396967	2102606	17F	neg	11273	1	0	129	=	0.12	R	S	<=	0.03	S	<=	0.06	S	=	0.12	S	S	<=	0.5	S	S	<=	0.5	S	neg	=	0.06	S	=	0.06	S	<=	1	S	<=	2	S	neg	neg
20154667	54	19to64	SAMN05222053	31	168323	297481	1983751	3	neg	180	2	0	2	<=	0.03	S	S	<=	0.03	S	<=	0.06	S	<=	0.06	S	S	<=	0.5	S	S	<=	0.5	S	neg	=	0.06	S	=	0.06	S	<=	1	S	<=	2	S	neg	neg
20154668	74	>65	SAMN05222054	147	34863	96604	2144464	7C	neg	1797	2	4	6	<=	0.03	S	S	<=	0.03	S	<=	0.06	S	<=	0.06	S	S	<=	0.5	S	S	<=	0.5	S	neg	=	0.06	S	=	0.06	S	<=	1	S	<=	2	S	neg	neg
20154669	56	19to64	SAMN05222055	37	111855	186975	1986198	12F	neg	220	0	0	2	<=	0.03	S	S	<=	0.03	S	<=	0.06	S	<=	0.06	S	S	<=	0.5	S	S	<=	0.5	S	neg	=	0.06	S	=	0.06	S	<=	1	S	<=	2	S	neg	neg
20154670	43	19to64	SAMN05222056	71	60132	125927	2028334	12F	neg	218	0	0	0	<=	0.03	S	S	<=	0.03	S	<=	0.06	S	<=	0.06	S	S	<=	0.5	S	S	<=	0.5	S	MEF	=	8	R	=	0.06	S	<=	1	S	<=	2	S	neg	FOLA-Q1Y,Q11H,E14D,I20L
20154671	29	19to64	SAMN05222057	42	94752	162337	1980249	12F	neg	220	0	0	2	<=	0.03	S	S	<=	0.03	S	<=	0.06	S	<=	0.06	S	S	<=	0.5	S	S	<=	0.5	S	neg	=	0.06	S	=	0.06	S	<=	1	S	<=	2	S	neg	neg
20154672	80	>65	SAMN05222058	83	52631	112210	2012699	7F	2	191	2	0	2	<=	0.03	S	S	<=	0.03	S	<=	0.06	S	<=	0.06	S	S	<=	0.5	S	S	<=	0.5	S	neg	=	0.06	S	=	0.06	S	<=	1	S	<=	2	S	neg	neg
20154673	69	>65	SAMN05222059	70	59385	170524	2081294	22F	neg	433	1	2	2	<=	0.03	S	S	<=	0.03	S	<=	0.06	S	<=	0.06	S	S	<=	0.5	S	S	<=	0.5	S	neg	=	0.06	S	=	0.06	S	<=	1	S	<=	2	S	neg	neg
20154674	59	19to64	SAMN05222060	103	39962	95604	2013959	7F	2	191	2	0	2	<=	0.03	S	S	<=	0.03	S	<=	0.06	S	<=	0.06	S	S	<=	0.5	S	S	<=	0.5	S	neg	=	0.06	S	=	0.06	S	<=	1	S	<=	2	S	neg	neg
20154675	0	0-4	SAMN05222061	48	99806	286430	2082165	9N	neg	66	1	0	0	<=	0.03	S	S	<=	0.03	S	<=	0.06	S	<=	0.06	S	S	<=	0.5	S	S	<=	0.5	S	neg	=	0.06	S	=	0.06	S	<=	1	S	<=	2	S	neg	neg
20154692	61	19to64	SAMN05222062	62	82911	198997	2077447	10A	neg	816	0	0	2	<=	0.03	S	S	<=	0.03	S	<=	0.06	S	<=	0.06	S	S	<=	0.5	S	S	<=	0.5	S	neg	=	0.06	S	=	0.06	S	<=	1	S	<=	2	S	neg	neg
20154693	12	5to18	SAMN09218863	113	46627	126946	2137014	4	1	695	0	0	0	<=	0.03	S	S	<=	0.03	S	<=	0.06	S	<=	0.06	S	S	<=	0.5	S	S	<=	0.5	S	MEF	=	8	R	=	0.06	S	<=	1	S	<=	2	S	neg	neg
20154694	59	19to64	SAMN09218824	110	35968	111622	2067014	33F	neg	100	2	NF	6	<=	0.03	S	S	<=	0.03	S	<=	0.06	S	<=	0.06	S	S	<=	0.5	S	S	<=	0.5	S	MEF	=	8	R	=	0.06	S	<=	1	S	<=	2	S	neg	FOLA-Q1Y,E14D,I20L:FOLP_189-ins
20154695	50	19to64	SAMN09218569	94	47261	141662	2133569	12F	neg	989	12	4	3	<=	0.03	S	S	<=	0.03	S	<=	0.06	S	<=	0.06	S	S	<=	0.5	S	S	<=	0.5	S	neg	=	0.06	S	=	0.06	S	<=	1	S	<=	2	S	neg	FOLP_178-ins
20154696	ND	ND	SAMN09224408	73	70210	153944	2078516	6C	neg	639	2	0	0	<=	0.03	S	S	<=	0.03	S	<=	0.06	S	<=	0.06	S	S	<=	0.5	S	S	<=	0.5	S	neg	=	0.06	S	=	0.06	S	<=	1	S	<=	2	S	neg	neg
20154697	61	19to64	SAMN09231416	56	84574	149042	2082739	6C	neg	639	2	0	0	<=	0.03	S	S	<=	0.03	S	<=	0.06	S	<=	0.06	S	S	<=	0.5	S	S	<=	0.5	S	MEF	=	8	R	=	0.06	S	<=	1	S	<=	2	S	neg	neg
20154698	90	>65	SAMN05222063	58	82242	198737	2011374	35B	1	558	4	7	7	=	2	R	S	=	4	I	=	0.5	I	=	1	I	S	=	1	I	S	>	2	R	MEF	=	8	R	=	0.06	S	<=	1	S	<=	2	S	neg	neg
20154699	18	5to18	SAMN05222064	55	79053	303774	2072702	9N	neg	517	1	0	0	<=	0.03	S	S	<=	0.03	S	<=	0.06	S	<=	0.06	S	S	<=	0.5	S	S	<=	0.5	S	neg	=	0.06	S	=	0.06	S	<=	1	S	<=	2	S	neg	neg
20154700	79	>65	SAMN05222065	44	125428	480387	2067235	33F	neg	2705	2	0	6	<=	0.03	S	S	<=	0.03	S	<=	0.06	S	<=	0.06	S	S	<=	0.5	S	S	<=	0.5	S	MEF	=	8	R	=	0.06	S	<=	1	S	<=	2	S	neg	FOLP_189-ins
20154701	91	>65	SAMN05222066	49	90644	307654	2213336	23B	neg	4507	2	0	0	<=	0.03	S	S	<=	0.03	S	<=	0.06	S	<=	0.06	S	S	<=	0.5	S	S	<=	0.5	S	ERMB	>	32	R	>	2	R	<=	1	S	<=	2	S	pos	neg
20154702	61	19to64	SAMN05222067	95	54797	183602	2138379	19F	2	654	2	0	0	<=	0.03	S	S	<=	0.03	S	<=	0.06	S	<=	0.06	S	S	<=	0.5	S	S	<=	0.5	S	neg	=	0.06	S	=	0.06	S	<=	1	S	<=	2	S	neg	neg
20154703	72	>65	SAMN05222068	69	91122	298405	2055651	22F	neg	7314	1	2	2	<=	0.03	S	S	<=	0.03	S	<=	0.06	S	<=	0.06	S	S	<=	0.5	S	S	<=	0.5	S	MEF	=	8	R	=	0.06	S	<=	1	S	<=	2	S	neg	neg
20154704	79	>65	SAMN05222069	69	59725	198870	2109173	34	neg	547	0	0	2	<=	0.03	S	S	<=	0.03	S	<=	0.06	S	<=	0.06	S	S	<=	0.5	S	S	<=	0.5	S	neg	=	0.06	S	=	0.06	S	<=	1	S	<=	2	S	neg	neg
20154705	52	19to64	SAMN05222070	31	158093	444106	2059048	33F	neg	100	2	0	6	<=	0.03	S	S	<=	0.03	S	<=	0.06	S	<=	0.06	S	S	<=	0.5	S	S	<=	0.5	S	MEF	=	8	R	=	0.06	S	<=	1	S	<=	2	S	neg	FOLP_189-ins
20154706	8	5to18	SAMN05222071	38	116362	256222	2042638	31	neg	1111	12	0	0	<=	0.03	S	S	<=	0.03	S	<=	0.06	S	<=	0.06	S	S	<=	0.5	S	S	<=	0.5	S	MEF	=	8	R	=	0.06	S	<=	1	S	<=	2	S	neg	neg
20154707	57	19to64	SAMN05222072	56	101410	232758	2107377	14	1	143	31	12	18	=	4	R	I	=	2	S	=	0.5	I	=	1	I	S	=	2	R	I	>	2	R	ERMB	>	32	R	>	2	R	<=	1	S	<=	2	S	pos	neg
20154708	84	>65	SAMN05222073	55	102561	298476	2056211	22F	neg	7314	1	2	2	<=	0.03	S	S	<=	0.03	S	<=	0.06	S	<=	0.06	S	S	<=	0.5	S	S	<=	0.5	S	MEF	=	8	R	=	0.06	S	<=	1	S	<=	2	S	neg	neg
20154709	0	0-4	SAMN05222074	32	110272	224008	2006395	35B	1	558	4	7	7	=	2	R	S	=	4	I	=	0.5	I	=	1	I	S	=	1	I	S	>	2	R	MEF	=	8	R	=	0.06	S	<=	1	S	<=	2	S	neg	neg
20154710	95	>65	SAMN05222075	46	183374	319354	2075601	6C	neg	1390	2	0	2	<=	0.03	S	S	<=	0.03	S	<=	0.06	S	<=	0.06	S	S	<=	0.5	S	S	<=	0.5	S	neg	=	0.06	S	=	0.06	S	<=	1	S	<=	2	S	neg	neg
20154711	64	19to64	SAMN09230809	40	118558	372698	1986290	8	neg	53	3	6	5	<=	0.03	S	S	<=	0.03	S	<=	0.06	S	<=	0.06	S	S	<=	0.5	S	S	<=	0.5	S	neg	=	0.06	S	=	0.06	S	<=	1	S	<=	2	S	neg	neg
20154712	74	>65	SAMN05222076	54	91767	297695	2056551	22F	neg	7314	1	2	2	<=	0.03	S	S	<=	0.03	S	<=	0.06	S	<=	0.06	S	S	<=	0.5	S	S	<=	0.5	S	MEF	=	8	R	=	0.06	S	<=	1	S	<=	2	S	neg	neg
20154713	72	>65	SAMN05222077	196	31924	107871	2063167	23A	neg	42	2	0	6	<=	0.03	S	S	<=	0.03	S	<=	0.06	S	<=	0.06	S	S	<=	0.5	S	S	<=	0.5	S	neg	=	0.06	S	=	0.06	S	<=	1	S	<=	2	S	neg	neg
20154714	63	19to64	SAMN05222078	48	121447	302040	2061933	19A	1:2	320	13	11	16	=	4	R	I	=	8	R	=	1	R	=	2	R	I	=	2	R	I	>	2	R	ERMB:MEF	>	32	R	>	2	R	<=	1	S	<=	2	S	pos	FOLA-Q1Y,Q11H,E14D,I20L:FOLP_195-ins
20154715	1	0-4	SAMN05222079	71	88442	178210	2088533	17F	neg	392	11	0	0	<=	0.03	S	S	<=	0.03	S	<=	0.06	S	<=	0.06	S	S	<=	0.5	S	S	<=	0.5	S	MEF	=	8	R	=	0.06	S	<=	1	S	<=	2	S	neg	neg
20154716	61	19to64	SAMN05222080	55	108284	298389	2047649	22F	neg	11274	1	2	2	<=	0.03	S	S	<=	0.03	S	<=	0.06	S	<=	0.06	S	S	<=	0.5	S	S	<=	0.5	S	MEF	=	8	R	=	0.06	S	<=	1	S	<=	2	S	neg	neg
20154717	49	19to64	SAMN05222081	59	102488	298353	2053147	22F	neg	10163	1	2	2	<=	0.03	S	S	<=	0.03	S	<=	0.06	S	<=	0.06	S	S	<=	0.5	S	S	<=	0.5	S	MEF	=	8	R	=	0.06	S	<=	1	S	<=	2	S	neg	neg
20154718	81	>65	SAMN05222082	39	193264	263175	1977343	3	neg	180	2	0	2	<=	0.03	S	S	<=	0.03	S	<=	0.06	S	<=	0.06	S	S	<=	0.5	S	S	<=	0.5	S	neg	=	0.06	S	=	0.06	S	<=	1	S	<=	2	S	neg	neg
20154719	73	>65	SAMN05222083	63	59441	198581	2074897	22F	neg	433	1	2	2	<=	0.03	S	S	<=	0.03	S	<=	0.06	S	<=	0.06	S	S	<=	0.5	S	S	<=	0.5	S	neg	=	0.06	S	=	0.06	S	<=	1	S	<=	2	S	neg	neg
20154720	48	19to64	SAMN05222084	65	87000	181828	2097682	22F	neg	10163	1	2	2	<=	0.03	S	S	<=	0.03	S	<=	0.06	S	<=	0.06	S	S	<=	0.5	S	S	<=	0.5	S	MEF	=	8	R	=	0.06	S	<=	1	S	<=	2	S	neg	neg
20154721	64	19to64	SAMN05222085	78	56921	125495	2076978	22F	neg	433	1	2	2	<=	0.03	S	S	<=	0.03	S	<=	0.06	S	<=	0.06	S	S	<=	0.5	S	S	<=	0.5	S	neg	=	0.06	S	=	0.06	S	<=	1	S	<=	2	S	neg	neg
20154722	59	19to64	SAMN05222086	44	109113	304663	2075384	16F	neg	1840	0	10	2	<=	0.03	S	S	<=	0.03	S	<=	0.06	S	<=	0.06	S	S	<=	0.5	S	S	<=	0.5	S	neg	=	0.06	S	=	0.06	S	<=	1	S	<=	2	S	neg	neg
20154723	62	19to64	SAMN05222087	65	56653	213137	2111368	22F	neg	433	1	2	2	<=	0.03	S	S	<=	0.03	S	<=	0.06	S	<=	0.06	S	S	<=	0.5	S	S	<=	0.5	S	neg	=	0.06	S	=	0.06	S	<=	1	S	<=	2	S	neg	neg
20154724	56	19to64	SAMN05222088	41	140212	350203	2054702	3	neg	180	2	0	111	=	0.06	S	S	=	0.06	S	<=	0.06	S	=	0.25	S	S	<=	0.5	S	S	=	1	I	ERMB	>	32	R	>	2	R	<=	1	S	<=	2	S	pos	neg
20154725	79	>65	SAMN05222089	66	118181	272362	2151695	34	neg	547	0	0	2	<=	0.03	S	S	<=	0.03	S	<=	0.06	S	<=	0.06	S	S	<=	0.5	S	S	<=	0.5	S	neg	=	0.06	S	=	0.06	S	<=	1	S	<=	2	S	neg	neg
20154726	85	>65	SAMN05222090	2577	4309	25597	2023669	8	neg	1268	3	5	NF	=	0.12	R	S	=	0.12	S	<=	0.06	S	=	0.25	S	S	<=	0.5	S	S	=	1	I	neg	=	0.06	S	=	0.06	S	<=	1	S	<=	2	S	neg	neg
20154727	0	0-4	SAMN05222091	64	74434	173090	2102016	15B	neg	199	1	0	6	<=	0.03	S	S	<=	0.03	S	<=	0.06	S	<=	0.06	S	S	<=	0.5	S	S	<=	0.5	S	neg	=	0.06	S	=	0.06	S	<=	1	S	<=	2	S	neg	neg
20154728	74	>65	SAMN05222092	33	167634	279444	1989765	3	neg	180	2	3	2	<=	0.03	S	S	<=	0.03	S	<=	0.06	S	<=	0.06	S	S	<=	0.5	S	S	<=	0.5	S	neg	=	0.06	S	=	0.06	S	<=	1	S	<=	2	S	neg	neg
20154729	61	19to64	SAMN05222093	51	72004	223394	2071497	22F	neg	433	1	2	2	<=	0.03	S	S	<=	0.03	S	<=	0.06	S	<=	0.06	S	S	<=	0.5	S	S	<=	0.5	S	neg	=	0.06	S	=	0.06	S	<=	1	S	<=	2	S	neg	neg
20154730	31	19to64	SAMN05222094	38	115446	273361	2024460	3	neg	180	2	3	2	<=	0.03	S	S	<=	0.03	S	<=	0.06	S	<=	0.06	S	S	<=	0.5	S	S	<=	0.5	S	neg	=	0.06	S	=	0.06	S	<=	1	S	<=	2	S	neg	neg
20154731	93	>65	SAMN05222095	58	86096	383550	2024810	12F	neg	218	0	0	0	<=	0.03	S	S	<=	0.03	S	<=	0.06	S	<=	0.06	S	S	<=	0.5	S	S	<=	0.5	S	MEF	=	8	R	=	0.06	S	<=	1	S	<=	2	S	neg	neg
20154732	3	0-4	SAMN05222096	24	163714	638301	2068832	33F	neg	2705	2	0	6	<=	0.03	S	S	<=	0.03	S	<=	0.06	S	<=	0.06	S	S	<=	0.5	S	S	<=	0.5	S	MEF	=	8	R	=	0.06	S	<=	1	S	<=	2	S	neg	FOLP_189-ins
20154733	58	19to64	SAMN05222097	56	103813	218990	2141931	23B	neg	439	0	0	0	<=	0.03	S	S	<=	0.03	S	<=	0.06	S	<=	0.06	S	S	<=	0.5	S	S	<=	0.5	S	neg	=	0.06	S	=	0.06	S	<=	1	S	<=	2	S	neg	neg
20154734	88	>65	SAMN09230967	45	123400	256148	2040249	31	neg	1111	12	0	0	<=	0.03	S	S	<=	0.03	S	<=	0.06	S	<=	0.06	S	S	<=	0.5	S	S	<=	0.5	S	MEF	=	8	R	=	0.06	S	<=	1	S	<=	2	S	neg	neg
20154735	56	19to64	SAMN09219383	254	16146	64541	2119048	13	1	574	11	NF	NF	<=	0.03	S	S	<=	0.03	S	<=	0.06	S	<=	0.06	S	S	<=	0.03	S	S	<=	0.5	S	neg	=	0.06	S	=	0.06	S	<=	1	S	<=	2	S	neg	neg
20154736	43	19to64	SAMN05222098	54	65611	318543	2071791	15A	neg	63	24	27	28	=	0.25	R	S	<=	0.03	S	<=	0.06	S	=	0.12	S	S	<=	0.5	S	S	<=	0.5	S	ERMB	>	32	R	>	2	R	<=	1	S	<=	2	S	pos	neg
20154737	63	19to64	SAMN05222099	44	79763	306623	2126723	23A	neg	338	19	1	24	=	0.5	R	S	=	0.25	S	<=	0.06	S	=	0.25	S	S	<=	0.5	S	S	<=	0.5	S	ERMB	>	32	R	>	2	R	<=	1	S	<=	2	S	pos	neg
20154738	88	>65	SAMN05222100	78	51765	162822	2022970	31	neg	568	12	0	0	<=	0.03	S	S	<=	0.03	S	<=	0.06	S	<=	0.06	S	S	<=	0.5	S	S	<=	0.5	S	neg	=	0.06	S	=	0.06	S	<=	1	S	<=	2	S	neg	neg
20154739	58	19to64	SAMN05222101	70	65343	140908	2113095	22F	neg	433	1	2	2	<=	0.03	S	S	<=	0.03	S	<=	0.06	S	<=	0.06	S	S	<=	0.5	S	S	<=	0.5	S	neg	=	0.06	S	=	0.06	S	<=	1	S	<=	2	S	neg	neg
20154740	99	>65	SAMN05222102	54	89905	223273	2009830	35B:35D	1	558	4	7	7	=	2	R	S	=	4	I	=	0.5	I	=	1	I	S	=	1	I	S	>	2	R	MEF	=	8	R	=	0.06	S	<=	1	S	<=	2	S	neg	neg
20154741	0	0-4	SAMN05222103	210	20225	49360	2133996	15C	neg	1262	2	0	2	<=	0.03	S	S	<=	0.03	S	<=	0.06	S	<=	0.06	S	S	<=	0.5	S	S	<=	0.5	S	neg	=	0.06	S	=	0.06	S	<=	1	S	<=	2	S	neg	FOLP_176-ins
20154742	91	>65	SAMN05222104	55	91657	289530	2119133	16F	neg	1840	0	10	2	<=	0.03	S	S	<=	0.03	S	<=	0.06	S	<=	0.06	S	S	<=	0.5	S	S	<=	0.5	S	neg	=	0.06	S	=	0.06	S	<=	1	S	<=	2	S	neg	neg
20154743	81	>65	SAMN09218588	95	60226	110030	2085874	6C	neg	639	2	0	0	<=	0.03	S	S	<=	0.03	S	<=	0.06	S	<=	0.06	S	S	<=	0.5	S	S	<=	0.5	S	MEF	=	8	R	=	0.06	S	<=	1	S	<=	2	S	neg	neg
20154744	29	19to64	SAMN05222105	35	79111	396575	2056413	33F	neg	100	2	0	6	<=	0.03	S	S	<=	0.03	S	<=	0.06	S	<=	0.06	S	S	<=	0.5	S	S	<=	0.5	S	MEF	=	8	R	=	0.06	S	<=	1	S	<=	2	S	neg	FOLP_189-ins
20154745	66	>65	SAMN05222106	49	76395	261954	1980409	3	neg	180	2	0	2	<=	0.03	S	S	<=	0.03	S	<=	0.06	S	<=	0.06	S	S	<=	0.5	S	S	<=	0.5	S	neg	=	0.06	S	=	0.06	S	<=	1	S	<=	2	S	neg	neg
20154746	61	19to64	SAMN05222107	55	92431	189409	2102658	16F	neg	11275	0	1	77	=	0.12	R	S	=	0.06	S	<=	0.06	S	<=	0.06	S	S	<=	0.5	S	S	<=	0.5	S	neg	=	0.06	S	=	0.06	S	<=	1	S	<=	2	S	neg	FOLP_169-ins
20154747	76	>65	SAMN05222108	91	50064	157468	2117464	19F	2	654	2	0	0	<=	0.03	S	S	<=	0.03	S	<=	0.06	S	<=	0.06	S	S	<=	0.5	S	S	<=	0.5	S	neg	=	0.06	S	=	0.06	S	<=	1	S	<=	2	S	neg	neg
20154748	79	>65	SAMN05222109	63	107013	314270	2089707	20	neg	1257	1	4	2	<=	0.03	S	S	<=	0.03	S	<=	0.06	S	<=	0.06	S	S	<=	0.5	S	S	<=	0.5	S	neg	=	0.06	S	=	0.06	S	<=	1	S	<=	2	S	neg	neg
20154749	67	>65	SAMN05222110	1838	4453	30159	2955347	12F	neg	989	12	4	3	<=	0.03	S	S	<=	0.03	S	<=	0.06	S	<=	0.06	S	S	<=	0.5	S	S	<=	0.5	S	neg	=	0.06	S	=	0.06	S	<=	1	S	<=	2	S	neg	FOLP_178-ins
20154750	57	19to64	SAMN05222111	61	59715	145297	2025119	12F	neg	218	0	0	0	<=	0.03	S	S	<=	0.03	S	<=	0.06	S	<=	0.06	S	S	<=	0.5	S	S	<=	0.5	S	MEF	=	8	R	=	0.06	S	<=	1	S	<=	2	S	neg	neg
20154751	76	>65	SAMN09224858	87	49687	217320	2115924	22F	neg	433	1	2	125	<=	0.03	S	S	<=	0.03	S	<=	0.06	S	=	0.12	S	S	<=	0.5	S	S	<=	0.5	S	neg	=	0.06	S	=	0.06	S	<=	1	S	<=	2	S	neg	neg
20154752	49	19to64	SAMN05222112	38	84946	191253	2024218	11A	neg	62	2	6	10	<=	0.03	S	S	<=	0.03	S	<=	0.06	S	<=	0.06	S	S	<=	0.5	S	S	<=	0.5	S	neg	=	0.06	S	=	0.06	S	<=	1	S	<=	2	S	neg	FOLP_182-ins
20154753	63	19to64	SAMN05222113	53	78902	332663	2091202	31	1	156	15	12	18	=	2	R	S	=	2	S	=	0.5	I	=	1	I	S	=	1	I	S	>	2	R	MEF	=	8	R	=	0.06	S	<=	1	S	<=	2	S	neg	FOLA-I20L:FOLP_178-ins
20154754	75	>65	SAMN05222114	61	93992	250309	2118480	15A	neg	63	24	27	28	=	0.25	R	S	<=	0.03	S	<=	0.06	S	=	0.12	S	S	<=	0.5	S	S	<=	0.5	S	ERMB	>	32	R	>	2	R	<=	1	S	<=	2	S	pos	FOLP_178-ins
20154755	72	>65	SAMN05222115	27	158614	397523	2043071	33F	neg	100	2	0	0	<=	0.03	S	S	<=	0.03	S	<=	0.06	S	<=	0.06	S	S	<=	0.5	S	S	<=	0.5	S	MEF	=	8	R	=	0.06	S	<=	1	S	<=	2	S	neg	neg
20154756	65	>65	SAMN05222116	29	158056	332808	2068888	33F	neg	2705	2	0	6	<=	0.03	S	S	<=	0.03	S	<=	0.06	S	<=	0.06	S	S	<=	0.5	S	S	<=	0.5	S	MEF	=	8	R	=	0.06	S	<=	1	S	<=	2	S	neg	FOLP_189-ins
20154757	80	>65	SAMN05222117	57	102512	298339	2055070	22F	neg	7314	1	2	2	<=	0.03	S	S	<=	0.03	S	<=	0.06	S	<=	0.06	S	S	<=	0.5	S	S	<=	0.5	S	MEF	=	8	R	=	0.06	S	<=	1	S	<=	2	S	neg	neg
20154758	86	>65	SAMN05222118	57	86989	179035	2044161	11A	2	62	2	6	0	<=	0.03	S	S	<=	0.03	S	<=	0.06	S	<=	0.06	S	S	<=	0.5	S	S	<=	0.5	S	neg	=	0.06	S	=	0.06	S	<=	1	S	<=	2	S	neg	FOLA-Q1H,I20L:FOLP_178-ins
20154759	54	19to64	SAMN05222119	81	72868	281398	2129527	19A	1:2	10452	13	11	16	=	4	R	I	=	8	R	=	1	R	=	2	R	I	=	2	R	I	>	2	R	ERMB:MEF	>	32	R	>	2	R	<=	1	S	<=	2	S	pos	FOLA-Q1Y,Q11H,E14D,I20L:FOLP_195-ins
20154760	60	19to64	SAMN05222120	81	58652	189667	2091487	7C	neg	1797	2	4	6	<=	0.03	S	S	<=	0.03	S	<=	0.06	S	<=	0.06	S	S	<=	0.5	S	S	<=	0.5	S	neg	=	0.06	S	=	0.06	S	<=	1	S	<=	2	S	neg	neg
20154761	90	>65	SAMN05222121	53	91443	242966	2119288	35F	neg	1635	0	0	3	<=	0.03	S	S	<=	0.03	S	<=	0.06	S	<=	0.06	S	S	<=	0.5	S	S	<=	0.5	S	neg	=	0.06	S	=	0.06	S	<=	1	S	<=	2	S	neg	neg
20154762	0	0-4	SAMN05222122	115	34829	145244	2060779	35B	1	558	4	7	7	=	2	R	S	=	4	I	=	0.5	I	=	1	I	S	=	1	I	S	>	2	R	neg	=	0.06	S	=	0.06	S	<=	1	S	<=	2	S	neg	neg
20154763	49	19to64	SAMN05222123	57	75402	203866	2069869	22F	neg	11276	1	2	2	<=	0.03	S	S	<=	0.03	S	<=	0.06	S	<=	0.06	S	S	<=	0.5	S	S	<=	0.5	S	neg	=	0.06	S	=	0.06	S	<=	1	S	<=	2	S	neg	neg
20154764	74	>65	SAMN05222124	38	102408	344849	2000776	35B	1	558	4	7	7	=	2	R	S	=	4	I	=	0.5	I	=	1	I	S	=	1	I	S	>	2	R	MEF	=	8	R	=	0.06	S	<=	1	S	<=	2	S	neg	neg
20154765	73	>65	SAMN05222125	62	88836	191647	2078547	16F	neg	10439	0	4	2	<=	0.03	S	S	<=	0.03	S	<=	0.06	S	<=	0.06	S	S	<=	0.5	S	S	<=	0.5	S	neg	=	0.06	S	=	0.06	S	<=	1	S	<=	2	S	neg	neg
20154766	48	19to64	SAMN05222126	36	198957	377733	1991985	8	neg	1268	3	5	5	<=	0.03	S	S	<=	0.03	S	<=	0.06	S	<=	0.06	S	S	<=	0.5	S	S	<=	0.5	S	neg	=	0.06	S	=	0.06	S	<=	1	S	<=	2	S	neg	neg
20154767	78	>65	SAMN09224510	76	94528	175687	2138894	15A	neg	2613	34	89	147	=	2	R	S	=	1	S	=	0.5	I	=	0.5	S	S	<=	0.5	S	S	>	2	R	ERMB	>	32	R	>	2	R	<=	1	S	<=	2	S	pos	neg
20154768	91	>65	SAMN09231486	58	70183	223268	2062453	23A	neg	42	2	0	6	<=	0.03	S	S	<=	0.03	S	<=	0.06	S	<=	0.06	S	S	<=	0.5	S	S	<=	0.5	S	neg	=	0.06	S	=	0.06	S	<=	1	S	<=	2	S	neg	neg
20154769	79	>65	SAMN05222127	50	78095	188874	2069619	22F	neg	433	1	2	2	<=	0.03	S	S	<=	0.03	S	<=	0.06	S	<=	0.06	S	S	<=	0.5	S	S	<=	0.5	S	neg	=	0.06	S	=	0.06	S	<=	1	S	<=	2	S	neg	neg
20154770	72	>65	SAMN05222128	57	62247	347488	2076378	24A/B/F	1	162	78	0	0	<=	0.03	S	S	<=	0.03	S	<=	0.06	S	<=	0.06	S	S	<=	0.5	S	S	<=	0.5	S	neg	=	0.06	S	=	0.06	S	<=	1	S	<=	2	S	neg	FOLA-Q1H,I20L:FOLP_177-ins:FOLP_180-ins
20154771	52	19to64	SAMN05222129	96	54781	185869	2110102	19F	2	654	2	0	0	<=	0.03	S	S	<=	0.03	S	<=	0.06	S	<=	0.06	S	S	<=	0.5	S	S	<=	0.5	S	neg	=	0.06	S	=	0.06	S	<=	1	S	<=	2	S	neg	neg
20154772	52	19to64	SAMN05222130	63	69929	168552	2101937	15A	neg	9692	76	0	2	<=	0.03	S	S	<=	0.03	S	<=	0.06	S	<=	0.06	S	S	<=	0.5	S	S	<=	0.5	S	MEF	=	8	R	=	0.06	S	<=	1	S	<=	2	S	neg	neg
20154773	70	>65	SAMN05222131	54	85017	243491	2005580	11A	2	62	2	6	0	<=	0.03	S	S	<=	0.03	S	<=	0.06	S	<=	0.06	S	S	<=	0.5	S	S	<=	0.5	S	neg	=	0.06	S	=	0.06	S	<=	1	S	<=	2	S	neg	neg
20154774	94	>65	SAMN05222132	44	218760	604123	2048510	33F	neg	100	2	0	6	<=	0.03	S	S	<=	0.03	S	<=	0.06	S	<=	0.06	S	S	<=	0.5	S	S	<=	0.5	S	neg	=	0.06	S	=	0.06	S	<=	1	S	<=	2	S	neg	neg
20154775	60	19to64	SAMN05222133	69	66619	239033	2075346	9N	neg	66	1	0	0	<=	0.03	S	S	<=	0.03	S	<=	0.06	S	<=	0.06	S	S	<=	0.5	S	S	<=	0.5	S	neg	=	0.06	S	=	0.06	S	<=	1	S	<=	2	S	neg	neg
20154776	72	>65	SAMN05222134	68	63311	233498	2046989	31	neg	1111	12	0	0	<=	0.03	S	S	<=	0.03	S	<=	0.06	S	<=	0.06	S	S	<=	0.5	S	S	<=	0.5	S	neg	=	0.06	S	=	0.06	S	<=	1	S	<=	2	S	neg	neg
20154777	72	>65	SAMN05222135	62	119688	209165	2095038	20	neg	1257	1	4	84	<=	0.03	S	S	<=	0.03	S	<=	0.06	S	<=	0.06	S	S	<=	0.5	S	S	<=	0.5	S	MEF	=	8	R	=	0.06	S	<=	1	S	<=	2	S	neg	neg
20154778	76	>65	SAMN05222136	43	103031	470535	2069819	6C	neg	1379	2	0	180	<=	0.03	S	S	<=	0.03	S	<=	0.06	S	<=	0.06	S	S	<=	0.5	S	S	<=	0.5	S	neg	=	0.06	S	=	0.06	S	<=	1	S	<=	2	S	neg	neg
20154860	43	19to64	SAMN05222137	37	151740	239341	2052774	9N	neg	11277	1	0	66	<=	0.03	S	S	<=	0.03	S	<=	0.06	S	<=	0.06	S	S	<=	0.5	S	S	<=	0.5	S	MEF	=	8	R	=	0.06	S	<=	1	S	<=	2	S	neg	neg
20154861	69	>65	SAMN05222138	44	102367	221688	2016916	35B	1	558	4	7	7	=	2	R	S	=	4	I	=	0.5	I	=	1	I	S	=	1	I	S	>	2	R	MEF	=	8	R	=	0.06	S	<=	1	S	<=	2	S	neg	neg
20154862	74	>65	SAMN05222139	87	92190	211223	2079660	16F	neg	10148	0	10	14	=	0.06	S	S	<=	0.03	S	<=	0.06	S	=	0.12	S	S	<=	0.5	S	S	<=	0.5	S	neg	=	0.06	S	=	0.06	S	<=	1	S	<=	2	S	neg	neg
20154863	67	>65	SAMN05222140	54	122793	213382	2009393	12F	neg	218	0	0	0	<=	0.03	S	S	<=	0.03	S	<=	0.06	S	<=	0.06	S	S	<=	0.5	S	S	<=	0.5	S	MEF	=	8	R	=	0.06	S	<=	1	S	<=	2	S	neg	neg
20154864	46	19to64	SAMN05222141	57	84033	169990	2066171	22F	neg	433	1	2	2	<=	0.03	S	S	<=	0.03	S	<=	0.06	S	<=	0.06	S	S	<=	0.5	S	S	<=	0.5	S	neg	=	0.06	S	=	0.06	S	<=	1	S	<=	2	S	neg	neg
20154865	58	19to64	SAMN05222142	101	53512	126272	2162937	38	neg	393	2	4	0	<=	0.03	S	S	<=	0.03	S	<=	0.06	S	<=	0.06	S	S	<=	0.5	S	S	<=	0.5	S	neg	=	0.06	S	=	0.06	S	<=	1	S	<=	2	S	neg	neg
20154866	39	19to64	SAMN05222143	38	308153	430189	1990379	3	neg	180	2	3	2	<=	0.03	S	S	<=	0.03	S	<=	0.06	S	<=	0.06	S	S	<=	0.5	S	S	<=	0.5	S	neg	=	0.06	S	=	0.06	S	<=	1	S	<=	2	S	neg	neg
20154867	63	19to64	SAMN05222144	51	100054	359263	2088029	6C	neg	473	1	4	21	=	0.06	S	S	<=	0.03	S	<=	0.06	S	<=	0.06	S	S	<=	0.5	S	S	<=	0.5	S	neg	=	0.06	S	=	0.06	S	<=	1	S	<=	2	S	neg	neg
20154868	75	>65	SAMN05222145	35	130294	235888	2040732	3	neg	180	2	0	2	<=	0.03	S	S	<=	0.03	S	<=	0.06	S	<=	0.06	S	S	<=	0.5	S	S	<=	0.5	S	ERMB:ERMBS:ERMBUP	=	0.06	S	=	0.06	S	<=	1	S	<=	2	S	neg	neg
20154869	61	19to64	SAMN05222146	58	77053	289218	2068729	22F	neg	433	1	2	2	<=	0.03	S	S	<=	0.03	S	<=	0.06	S	<=	0.06	S	S	<=	0.5	S	S	<=	0.5	S	neg	=	0.06	S	=	0.06	S	<=	1	S	<=	2	S	neg	neg
20154871	30	19to64	SAMN05222147	48	86836	146223	2013425	35B	1	558	4	7	7	=	2	R	S	=	4	I	=	0.5	I	=	1	I	S	=	1	I	S	>	2	R	RPLD1-Q5K	=	0.06	S	=	0.06	S	<=	1	S	<=	2	S	neg	neg
20154872	53	19to64	SAMN05222148	51	69264	290691	2068980	22F	neg	433	1	2	2	<=	0.03	S	S	<=	0.03	S	<=	0.06	S	<=	0.06	S	S	<=	0.5	S	S	<=	0.5	S	neg	=	0.06	S	=	0.06	S	<=	1	S	<=	2	S	neg	neg
20154873	74	>65	SAMN05222149	72	71388	195631	2086460	35B	neg	452	0	0	148	=	0.12	R	S	=	0.06	S	<=	0.06	S	=	0.12	S	S	<=	0.5	S	S	<=	0.5	S	neg	=	0.06	S	=	0.06	S	<=	1	S	<=	2	S	neg	neg
20154874	51	19to64	SAMN05222150	61	103266	226183	2122376	12F	neg	989	12	4	3	<=	0.03	S	S	<=	0.03	S	<=	0.06	S	<=	0.06	S	S	<=	0.5	S	S	<=	0.5	S	neg	=	0.06	S	=	0.06	S	<=	1	S	<=	2	S	neg	FOLA-I20L:FOLP_178-ins
20154875	60	19to64	SAMN05222151	59	84652	148251	2112585	15A	neg	2613	34	89	147	=	2	R	S	=	1	S	=	0.5	I	=	0.5	S	S	<=	0.5	S	S	>	2	R	ERMB	>	32	R	>	2	R	<=	1	S	<=	2	S	pos	neg
20154876	48	19to64	SAMN05222152	46	90995	221874	2016965	35B:35D	1	558	4	7	28	=	0.25	R	S	=	0.12	S	=	0.12	S	=	0.12	S	S	<=	0.5	S	S	<=	0.5	S	MEF	=	8	R	=	0.06	S	<=	1	S	<=	2	S	neg	neg
20154877	32	19to64	SAMN05222153	60	90584	201336	2100351	23A	neg	172	80	1	1	=	0.25	R	S	=	0.06	S	<=	0.06	S	=	0.12	S	S	<=	0.5	S	S	<=	0.5	S	neg	=	0.06	S	=	0.06	S	<=	1	S	<=	2	S	neg	FOLA-Q1Y,I20L:FOLP_189-ins
20154878	33	19to64	SAMN05222154	47	146503	364980	2048166	11B/11C	neg	6498	1	0	0	<=	0.03	S	S	<=	0.03	S	<=	0.06	S	<=	0.06	S	S	<=	0.5	S	S	<=	0.5	S	neg	=	0.06	S	=	0.06	S	<=	1	S	<=	2	S	neg	neg
20154879	64	19to64	SAMN05222155	29	288361	357011	1975860	3	neg	180	2	0	2	<=	0.03	S	S	<=	0.03	S	<=	0.06	S	<=	0.06	S	S	<=	0.5	S	S	<=	0.5	S	neg	=	0.06	S	=	0.06	S	<=	1	S	<=	2	S	neg	neg
20154880	62	19to64	SAMN05222156	117	84176	232998	2116144	35F	neg	1635	0	0	3	<=	0.03	S	S	<=	0.03	S	<=	0.06	S	<=	0.06	S	S	<=	0.5	S	S	<=	0.5	S	neg	=	0.06	S	=	0.06	S	<=	1	S	<=	2	S	neg	neg
20154881	63	19to64	SAMN05222157	49	120063	305473	2088595	23A	neg	338	0	1	1	=	0.25	R	S	=	0.06	S	<=	0.06	S	=	0.12	S	S	<=	0.5	S	S	<=	0.5	S	neg	=	0.06	S	=	0.06	S	<=	1	S	<=	2	S	neg	neg
20154882	63	19to64	SAMN05222158	93	59788	162585	2105026	22F	neg	4527	1	2	2	<=	0.03	S	S	<=	0.03	S	<=	0.06	S	<=	0.06	S	S	<=	0.5	S	S	<=	0.5	S	neg	=	0.06	S	=	0.06	S	<=	1	S	<=	2	S	neg	neg
20154883	41	19to64	SAMN05222159	87	64991	203252	2136252	7C	neg	1797	2	4	6	<=	0.03	S	S	<=	0.03	S	<=	0.06	S	<=	0.06	S	S	<=	0.5	S	S	<=	0.5	S	neg	=	0.06	S	=	0.06	S	<=	1	S	<=	2	S	neg	neg
20154884	62	19to64	SAMN05222160	64	93567	383492	2023116	12F	neg	218	0	0	0	<=	0.03	S	S	<=	0.03	S	<=	0.06	S	<=	0.06	S	S	<=	0.5	S	S	<=	0.5	S	MEF	=	8	R	=	0.06	S	<=	1	S	<=	2	S	neg	neg
20154885	67	>65	SAMN05222161	45	84114	272721	2061668	22F	neg	9259	1	2	2	<=	0.03	S	S	<=	0.03	S	<=	0.06	S	<=	0.06	S	S	<=	0.5	S	S	<=	0.5	S	neg	=	0.06	S	=	0.06	S	<=	1	S	<=	2	S	neg	FOLA-Q1H,Q11H,E14D,I20L
20154886	101	>65	SAMN05222162	90	51569	135391	2089700	6B	neg	11590	0	4	2	<=	0.03	S	S	<=	0.03	S	<=	0.06	S	<=	0.06	S	S	<=	0.5	S	S	<=	0.5	S	neg	=	0.06	S	=	0.06	S	<=	1	S	<=	2	S	neg	neg
20154887	78	>65	SAMN05222163	59	69350	298479	2055872	22F	neg	11278	1	2	2	<=	0.03	S	S	<=	0.03	S	<=	0.06	S	<=	0.06	S	S	<=	0.5	S	S	<=	0.5	S	MEF	=	8	R	=	0.06	S	<=	1	S	<=	2	S	neg	neg
20154888	95	>65	SAMN05222164	61	187851	263550	1980448	3	neg	180	2	0	2	<=	0.03	S	S	<=	0.03	S	<=	0.06	S	<=	0.06	S	S	<=	0.5	S	S	<=	0.5	S	neg	=	0.06	S	=	0.06	S	<=	1	S	<=	2	S	neg	neg
20154889	47	19to64	SAMN05222165	33	182915	306276	2060915	23A	neg	7480	0	1	1	=	0.25	R	S	=	0.06	S	<=	0.06	S	=	0.12	S	S	<=	0.5	S	S	<=	0.5	S	neg	=	0.06	S	=	0.06	S	<=	1	S	<=	2	S	neg	neg
20154890	52	19to64	SAMN05222166	40	130776	379292	2062594	6C	neg	1379	19	31	8	=	1	R	S	=	1	S	=	0.12	S	=	0.25	S	S	<=	0.5	S	S	=	2	R	MEF	=	8	R	=	0.06	S	<=	1	S	<=	2	S	neg	FOLA-Q1H,I20L:FOLP_173-ins
20154891	60	19to64	SAMN05222167	62	93550	383481	2022670	12F	neg	218	0	0	0	<=	0.03	S	S	<=	0.03	S	<=	0.06	S	<=	0.06	S	S	<=	0.5	S	S	<=	0.5	S	MEF	=	8	R	=	0.06	S	<=	1	S	<=	2	S	neg	neg
20154892	39	19to64	SAMN05222168	62	69178	223281	2068523	22F	neg	433	1	2	2	<=	0.03	S	S	<=	0.03	S	<=	0.06	S	<=	0.06	S	S	<=	0.5	S	S	<=	0.5	S	neg	=	0.06	S	=	0.06	S	<=	1	S	<=	2	S	neg	neg
20154893	57	19to64	SAMN05222169	84	81102	312944	2008829	12F	neg	218	0	0	0	<=	0.03	S	S	<=	0.03	S	<=	0.06	S	<=	0.06	S	S	<=	0.5	S	S	<=	0.5	S	MEF	=	8	R	=	0.06	S	<=	1	S	<=	2	S	neg	neg
20154894	71	>65	SAMN05222170	52	82246	260298	2045213	35B	1	558	4	7	7	=	2	R	S	=	4	I	=	0.5	I	=	1	I	S	=	1	I	S	>	2	R	neg	=	0.06	S	=	0.06	S	<=	1	S	<=	2	S	neg	neg
20154895	54	19to64	SAMN05222171	67	100365	261193	2041795	3	neg	180	2	0	111	=	0.06	S	S	=	0.06	S	<=	0.06	S	=	0.25	S	S	<=	0.5	S	S	=	1	I	ERMB	>	32	R	>	2	R	<=	1	S	<=	2	S	pos	neg
20154896	2	0-4	SAMN05222172	66	97928	261623	2109153	10A	neg	816	0	0	2	<=	0.03	S	S	<=	0.03	S	<=	0.06	S	<=	0.06	S	S	<=	0.5	S	S	<=	0.5	S	neg	=	0.06	S	=	0.06	S	<=	1	S	<=	2	S	neg	neg
20154898	72	>65	SAMN05222174	39	120520	239692	2013488	35B	1	558	4	7	7	=	2	R	S	=	4	I	=	0.5	I	=	1	I	S	=	1	I	S	>	2	R	MEF	=	8	R	=	0.06	S	<=	1	S	<=	2	S	neg	neg
20154900	52	19to64	SAMN05222176	135	52057	148283	2076094	19A	neg	292	30	0	0	<=	0.03	S	S	<=	0.03	S	<=	0.06	S	<=	0.06	S	S	<=	0.5	S	S	<=	0.5	S	neg	=	0.06	S	=	0.06	S	<=	1	S	<=	2	S	neg	neg
20154901	68	>65	SAMN05222177	56	96905	183953	2048720	9N	neg	66	1	0	0	<=	0.03	S	S	<=	0.03	S	<=	0.06	S	<=	0.06	S	S	<=	0.5	S	S	<=	0.5	S	neg	=	0.06	S	=	0.06	S	<=	1	S	<=	2	S	neg	neg
20154902	5	5to18	SAMN05222178	286	46211	114034	1981591	3	neg	180	2	3	2	<=	0.03	S	S	<=	0.03	S	<=	0.06	S	<=	0.06	S	S	<=	0.5	S	S	<=	0.5	S	neg	=	0.06	S	=	0.06	S	<=	1	S	<=	2	S	neg	neg
20154903	51	19to64	SAMN05222179	87	64519	174820	2006993	7F	2	191	2	0	2	<=	0.03	S	S	<=	0.03	S	<=	0.06	S	<=	0.06	S	S	<=	0.5	S	S	<=	0.5	S	neg	=	0.06	S	=	0.06	S	<=	1	S	<=	2	S	neg	neg
20154904	1	0-4	SAMN05222180	94	81711	165295	2008959	35B:35D	1	558	4	7	7	=	2	R	S	=	4	I	=	0.5	I	=	1	I	S	=	1	I	S	>	2	R	neg	=	0.06	S	=	0.06	S	<=	1	S	<=	2	S	neg	neg
20154905	82	>65	SAMN05222181	162	58359	167657	1975308	3	neg	180	2	0	2	<=	0.03	S	S	<=	0.03	S	<=	0.06	S	<=	0.06	S	S	<=	0.5	S	S	<=	0.5	S	neg	=	0.06	S	=	0.06	S	<=	1	S	<=	2	S	neg	neg
20154906	67	>65	SAMN05222182	131	41810	93173	2055319	23A	neg	338	0	NF	1	=	0.25	R	S	=	0.06	S	<=	0.06	S	<=	0.06	S	S	=	0.12	S	S	<=	0.5	S	neg	=	0.06	S	=	0.06	S	<=	1	S	<=	2	S	neg	neg
20154907	79	>65	SAMN05222183	380	26723	115385	2093403	6A	1	242	13	31	146	=	2	R	S	=	1	S	=	0.25	S	=	1	I	S	=	1	I	S	>	2	R	ERMB:ERMBUP:RPLD2-V3I	>	32	R	>	2	R	<=	1	S	<=	2	S	pos	FOLP_195-ins
20154910	79	>65	SAMN05222186	42	114201	507237	2046241	9N	neg	66	1	0	0	<=	0.03	S	S	<=	0.03	S	<=	0.06	S	<=	0.06	S	S	<=	0.5	S	S	<=	0.5	S	neg	=	0.06	S	=	0.06	S	<=	1	S	<=	2	S	neg	neg
20154911	64	19to64	SAMN05222187	64	85674	383445	2021474	12F	neg	218	0	0	0	<=	0.03	S	S	<=	0.03	S	<=	0.06	S	<=	0.06	S	S	<=	0.5	S	S	<=	0.5	S	MEF	=	8	R	=	0.06	S	<=	1	S	<=	2	S	neg	neg
20154912	62	19to64	SAMN05222188	73	60232	183935	2020116	31	neg	568	12	0	0	<=	0.03	S	S	<=	0.03	S	<=	0.06	S	<=	0.06	S	S	<=	0.5	S	S	<=	0.5	S	neg	=	0.06	S	=	0.06	S	<=	1	S	<=	2	S	neg	neg
20154913	36	19to64	SAMN05222189	94	58811	193653	2135522	7C	neg	1797	2	4	6	<=	0.03	S	S	<=	0.03	S	<=	0.06	S	<=	0.06	S	S	<=	0.5	S	S	<=	0.5	S	neg	=	0.06	S	=	0.06	S	<=	1	S	<=	2	S	neg	neg
20154914	64	19to64	SAMN05222190	66	97944	323307	1988898	3	neg	180	2	3	2	<=	0.03	S	S	<=	0.03	S	<=	0.06	S	<=	0.06	S	S	<=	0.5	S	S	<=	0.5	S	neg	=	0.06	S	=	0.06	S	<=	1	S	<=	2	S	neg	neg
20154915	59	19to64	SAMN05222191	53	72517	315244	2043825	19A	1:2	320	13	11	16	=	4	R	I	=	8	R	=	1	R	=	2	R	I	=	2	R	I	>	2	R	ERMB:MEF	>	32	R	>	2	R	<=	1	S	<=	2	S	pos	FOLA-Q1Y,Q11H,E14D,I20L:FOLP_195-ins
20154916	22	19to64	SAMN05222192	52	100513	185349	2126420	21	neg	432	0	0	2	<=	0.03	S	S	<=	0.03	S	<=	0.06	S	<=	0.06	S	S	<=	0.5	S	S	<=	0.5	S	neg	=	0.06	S	=	0.06	S	<=	1	S	<=	2	S	neg	neg
20154917	85	>65	SAMN05222193	109	74418	155942	2063670	23A	neg	10323	2	0	0	<=	0.03	S	S	<=	0.03	S	<=	0.06	S	<=	0.06	S	S	<=	0.5	S	S	<=	0.5	S	neg	=	0.06	S	=	0.06	S	<=	1	S	<=	2	S	neg	neg
20154918	55	19to64	SAMN05222194	35	155287	277307	1978159	3	neg	180	2	0	2	<=	0.03	S	S	<=	0.03	S	<=	0.06	S	<=	0.06	S	S	<=	0.5	S	S	<=	0.5	S	neg	=	0.06	S	=	0.06	S	<=	1	S	<=	2	S	neg	neg
20154919	93	>65	SAMN05222195	38	113277	338445	2063515	35F	neg	498	0	0	3	<=	0.03	S	S	<=	0.03	S	<=	0.06	S	<=	0.06	S	S	<=	0.5	S	S	<=	0.5	S	neg	=	0.06	S	=	0.06	S	<=	1	S	<=	2	S	neg	neg
20154920	95	>65	SAMN05222196	57	87006	232602	2077847	22F	neg	433	1	2	2	<=	0.03	S	S	<=	0.03	S	<=	0.06	S	<=	0.06	S	S	<=	0.5	S	S	<=	0.5	S	neg	=	0.06	S	=	0.06	S	<=	1	S	<=	2	S	neg	neg
20154921	89	>65	SAMN05222197	20	444131	605912	2055514	33F	neg	100	2	0	6	<=	0.03	S	S	<=	0.03	S	<=	0.06	S	<=	0.06	S	S	<=	0.5	S	S	<=	0.5	S	MEF	=	8	R	=	0.06	S	<=	1	S	<=	2	S	neg	FOLP_189-ins
20154922	74	>65	SAMN05222198	38	192987	261798	1976272	3	neg	180	2	0	2	<=	0.03	S	S	<=	0.03	S	<=	0.06	S	<=	0.06	S	S	<=	0.5	S	S	<=	0.5	S	neg	=	0.06	S	=	0.06	S	<=	1	S	<=	2	S	neg	neg
20154923	62	19to64	SAMN05222199	54	74215	198528	2014767	35B	1	11606	4	7	7	=	2	R	S	=	4	I	=	0.5	I	=	1	I	S	=	1	I	S	>	2	R	neg	=	0.06	S	=	0.06	S	<=	1	S	<=	2	S	neg	neg
20154924	57	19to64	SAMN05222200	175	47362	129401	2098681	23B	neg	1373	0	1	1	=	0.25	R	S	=	0.06	S	<=	0.06	S	=	0.12	S	S	<=	0.5	S	S	<=	0.5	S	neg	=	0.06	S	=	0.06	S	<=	1	S	<=	2	S	neg	FOLP_180-ins
20154925	31	19to64	SAMN05222201	52	113909	604103	2087963	15A	1	3811	1	0	0	<=	0.03	S	S	<=	0.03	S	<=	0.06	S	<=	0.06	S	S	<=	0.5	S	S	<=	0.5	S	neg	=	0.06	S	=	0.06	S	<=	1	S	<=	2	S	neg	neg
20154926	93	>65	SAMN05222202	37	116111	269522	1979088	3	neg	180	2	0	2	<=	0.03	S	S	<=	0.03	S	<=	0.06	S	<=	0.06	S	S	<=	0.5	S	S	<=	0.5	S	neg	=	0.06	S	=	0.06	S	<=	1	S	<=	2	S	neg	neg
20154927	35	19to64	SAMN05222203	52	87060	261224	2071275	22F	neg	433	1	2	2	<=	0.03	S	S	<=	0.03	S	<=	0.06	S	<=	0.06	S	S	<=	0.5	S	S	<=	0.5	S	neg	=	0.06	S	=	0.06	S	<=	1	S	<=	2	S	neg	neg
20154928	3	0-4	SAMN05222204	46	108554	319180	2078365	22F	neg	433	1	2	2	<=	0.03	S	S	<=	0.03	S	<=	0.06	S	<=	0.06	S	S	<=	0.5	S	S	<=	0.5	S	neg	=	0.06	S	=	0.06	S	<=	1	S	<=	2	S	neg	neg
20154929	78	>65	SAMN05222205	50	75981	338756	2053134	11A	2	62	2	6	0	<=	0.03	S	S	<=	0.03	S	<=	0.06	S	<=	0.06	S	S	<=	0.5	S	S	<=	0.5	S	neg	=	0.06	S	=	0.06	S	<=	1	S	<=	2	S	neg	neg
20154930	85	>65	SAMN05222206	39	123177	272471	2138717	23B	neg	439	0	0	11	=	0.06	S	S	=	0.06	S	<=	0.06	S	<=	0.06	S	S	<=	0.5	S	S	<=	0.5	S	neg	=	0.06	S	=	0.06	S	<=	1	S	<=	2	S	neg	neg
20154931	52	19to64	SAMN05222207	30	128742	312230	2075864	23A	neg	338	19	1	24	=	0.5	R	S	=	0.25	S	<=	0.06	S	=	0.25	S	S	<=	0.5	S	S	<=	0.5	S	ERMB	>	32	R	>	2	R	<=	1	S	<=	2	S	pos	neg
20154932	49	19to64	SAMN05222208	82	81945	194905	2131656	6C	1	490	1	4	2	<=	0.03	S	S	<=	0.03	S	<=	0.06	S	<=	0.06	S	S	<=	0.5	S	S	<=	0.5	S	MEF	=	8	R	=	0.06	S	<=	1	S	<=	2	S	neg	FOLA-Q1Y,I20L
20154933	85	>65	SAMN05222209	70	86470	165192	2192707	6C	1	490	1	4	2	<=	0.03	S	S	<=	0.03	S	<=	0.06	S	<=	0.06	S	S	<=	0.5	S	S	<=	0.5	S	MEF	=	8	R	=	0.06	S	<=	1	S	<=	2	S	neg	FOLA-Q1Y,I20L
20154934	23	19to64	SAMN05222210	19	431739	748766	1988700	3	neg	180	2	3	2	<=	0.03	S	S	<=	0.03	S	<=	0.06	S	<=	0.06	S	S	<=	0.5	S	S	<=	0.5	S	neg	=	0.06	S	=	0.06	S	<=	1	S	<=	2	S	neg	neg
20154935	35	19to64	SAMN05222211	38	137434	288384	1981643	3	neg	180	2	0	2	<=	0.03	S	S	<=	0.03	S	<=	0.06	S	<=	0.06	S	S	<=	0.5	S	S	<=	0.5	S	neg	=	0.06	S	=	0.06	S	<=	1	S	<=	2	S	neg	neg
20154936	56	19to64	SAMN05222212	48	97617	227804	2068288	9N	neg	66	1	0	0	<=	0.03	S	S	<=	0.03	S	<=	0.06	S	<=	0.06	S	S	<=	0.5	S	S	<=	0.5	S	neg	=	0.06	S	=	0.06	S	<=	1	S	<=	2	S	neg	neg
20154937	79	>65	SAMN05222213	49	108603	289442	2113463	23A	neg	338	19	1	24	=	0.5	R	S	=	0.25	S	<=	0.06	S	=	0.25	S	S	<=	0.5	S	S	<=	0.5	S	ERMB	>	32	R	>	2	R	<=	1	S	<=	2	S	pos	neg
20154938	67	>65	SAMN05222214	39	93903	313331	1990247	3	neg	180	2	3	2	<=	0.03	S	S	<=	0.03	S	<=	0.06	S	<=	0.06	S	S	<=	0.5	S	S	<=	0.5	S	neg	=	0.06	S	=	0.06	S	<=	1	S	<=	2	S	neg	neg
20154939	84	>65	SAMN05222215	107	49266	170407	2162100	38	neg	393	2	4	0	<=	0.03	S	S	<=	0.03	S	<=	0.06	S	<=	0.06	S	S	<=	0.5	S	S	<=	0.5	S	neg	=	0.06	S	=	0.06	S	<=	1	S	<=	2	S	neg	neg
20154940	61	19to64	SAMN05222216	74	125320	247431	2056247	20	neg	13511	0	4	23	<=	0.03	S	S	<=	0.03	S	<=	0.06	S	<=	0.06	S	S	<=	0.5	S	S	<=	0.5	S	ERMB	>	32	R	>	2	R	<=	1	S	<=	2	S	pos	FOLP_169-ins
20154941	49	19to64	SAMN05222217	64	61235	159717	2014227	35B	1	558	4	7	7	=	2	R	S	=	4	I	=	0.5	I	=	1	I	S	=	1	I	S	>	2	R	MEF	=	8	R	=	0.06	S	<=	1	S	<=	2	S	neg	neg
20154942	87	>65	SAMN05222218	229	16973	67611	2072701	16F	neg	995	9	4	3	<=	0.03	S	S	<=	0.03	S	<=	0.06	S	<=	0.06	S	S	<=	0.5	S	S	<=	0.5	S	neg	=	0.06	S	=	0.06	S	<=	1	S	<=	2	S	neg	neg
20154978	17	5to18	SAMN05222219	65	130595	294673	2101245	23A	neg	11585	0	1	1	=	0.25	R	S	=	0.06	S	<=	0.06	S	=	0.12	S	S	<=	0.5	S	S	<=	0.5	S	MEF	=	8	R	=	0.06	S	<=	1	S	<=	2	S	neg	neg
20154980	81	>65	SAMN05222220	53	79209	243185	2132621	35B	1	11584	4	12	7	=	2	R	S	=	4	I	=	0.5	I	=	1	I	S	=	1	I	S	>	2	R	MEF	=	8	R	=	0.06	S	<=	1	S	<=	2	S	neg	FOLA-I20L:FOLP_178-ins
20154981	79	>65	SAMN05222221	60	81623	219513	2141973	23B	neg	1847	0	0	0	<=	0.03	S	S	<=	0.03	S	<=	0.06	S	<=	0.06	S	S	<=	0.5	S	S	<=	0.5	S	neg	=	0.06	S	=	0.06	S	<=	1	S	<=	2	S	neg	neg
20154982	79	>65	SAMN05222222	53	73638	254713	2081011	22F	neg	433	1	2	59	<=	0.03	S	S	<=	0.03	S	<=	0.06	S	<=	0.06	S	S	<=	0.5	S	S	<=	0.5	S	MEF	=	8	R	=	0.06	S	<=	1	S	<=	2	S	neg	neg
20154983	67	>65	SAMN05222223	104	85702	280758	2130751	9N	neg	405	23	0	0	<=	0.03	S	S	<=	0.03	S	<=	0.06	S	<=	0.06	S	S	<=	0.5	S	S	<=	0.5	S	neg	=	0.06	S	=	0.06	S	<=	1	S	<=	2	S	neg	neg
20154985	80	>65	SAMN05222224	59	82235	154791	2025715	35B	1	7486	4	7	7	=	2	R	S	=	4	I	=	0.5	I	=	1	I	S	=	1	I	S	>	2	R	MEF	=	8	R	=	0.06	S	<=	1	S	<=	2	S	neg	neg
20154986	41	19to64	SAMN05222225	57	75000	317523	2046670	19A	1:2	320	13	11	16	=	4	R	I	=	8	R	=	1	R	=	2	R	I	=	2	R	I	>	2	R	ERMB:MEF	>	32	R	>	2	R	<=	1	S	<=	2	S	pos	FOLA-Q1Y,Q11H,E14D,I20L:FOLP_195-ins
20154987	82	>65	SAMN05222226	62	62062	213183	2066675	22F	neg	433	1	2	2	<=	0.03	S	S	<=	0.03	S	<=	0.06	S	<=	0.06	S	S	<=	0.5	S	S	<=	0.5	S	neg	=	0.06	S	=	0.06	S	<=	1	S	<=	2	S	neg	neg
20154988	95	>65	SAMN05222227	114	38247	100071	2133779	15A	neg	9939	24	27	28	=	0.25	R	S	<=	0.03	S	<=	0.06	S	=	0.12	S	S	<=	0.5	S	S	<=	0.5	S	ERMB	>	32	R	>	2	R	<=	1	S	<=	2	S	pos	FOLP_178-ins
20154989	66	>65	SAMN05222228	69	62446	166942	2022687	12F	neg	220	0	0	2	<=	0.03	S	S	<=	0.03	S	<=	0.06	S	<=	0.06	S	S	<=	0.5	S	S	<=	0.5	S	neg	=	0.06	S	=	0.06	S	<=	1	S	<=	2	S	neg	neg
20154990	46	19to64	SAMN05222229	49	90679	322506	2092416	20	neg	1257	1	4	2	<=	0.03	S	S	<=	0.03	S	<=	0.06	S	<=	0.06	S	S	<=	0.5	S	S	<=	0.5	S	neg	=	0.06	S	=	0.06	S	<=	1	S	<=	2	S	neg	neg
20154991	33	19to64	SAMN05222230	39	108380	242994	2082885	9N	neg	632	1	0	0	<=	0.03	S	S	<=	0.03	S	<=	0.06	S	<=	0.06	S	S	<=	0.5	S	S	<=	0.5	S	neg	=	0.06	S	=	0.06	S	<=	1	S	<=	2	S	neg	neg
20154992	46	19to64	SAMN05222231	45	97869	325965	2078513	16F	neg	10439	0	4	2	<=	0.03	S	S	<=	0.03	S	<=	0.06	S	<=	0.06	S	S	<=	0.5	S	S	<=	0.5	S	neg	=	0.06	S	=	0.06	S	<=	1	S	<=	2	S	neg	neg
20154993	75	>65	SAMN05222232	59	125294	216444	2022722	3	neg	180	2	3	2	<=	0.03	S	S	<=	0.03	S	<=	0.06	S	<=	0.06	S	S	<=	0.5	S	S	<=	0.5	S	neg	=	0.06	S	=	0.06	S	<=	1	S	<=	2	S	neg	neg
20154994	58	19to64	SAMN05222233	27	199198	580348	1994901	8	neg	1480	3	5	5	<=	0.03	S	S	<=	0.03	S	<=	0.06	S	<=	0.06	S	S	<=	0.5	S	S	<=	0.5	S	neg	=	0.06	S	=	0.06	S	<=	1	S	<=	2	S	neg	neg
20154995	53	19to64	SAMN05222234	47	69253	147796	2055752	22F	neg	7314	1	2	2	<=	0.03	S	S	<=	0.03	S	<=	0.06	S	<=	0.06	S	S	<=	0.5	S	S	<=	0.5	S	MEF	=	8	R	=	0.06	S	<=	1	S	<=	2	S	neg	neg
20154996	45	19to64	SAMN05222235	78	59508	184793	2013510	7F	2	191	2	0	2	<=	0.03	S	S	<=	0.03	S	<=	0.06	S	<=	0.06	S	S	<=	0.5	S	S	<=	0.5	S	neg	=	0.06	S	=	0.06	S	<=	1	S	<=	2	S	neg	neg
20154997	20	19to64	SAMN05222236	93	50241	100468	2070456	11A	2	62	2	6	0	<=	0.03	S	S	<=	0.03	S	<=	0.06	S	<=	0.06	S	S	<=	0.5	S	S	<=	0.5	S	MEF	=	8	R	=	0.06	S	<=	1	S	<=	2	S	neg	neg
20154999	40	19to64	SAMN05222238	114	38023	96859	2068014	16F	neg	659	9	0	3	<=	0.03	S	S	<=	0.03	S	<=	0.06	S	<=	0.06	S	S	<=	0.5	S	S	<=	0.5	S	neg	=	0.06	S	=	0.06	S	<=	1	S	<=	2	S	neg	neg
20155000	41	19to64	SAMN05222239	91	59339	142620	2082560	15B	neg	4528	0	0	2	<=	0.03	S	S	<=	0.03	S	<=	0.06	S	<=	0.06	S	S	<=	0.5	S	S	<=	0.5	S	neg	=	0.06	S	=	0.06	S	<=	1	S	<=	2	S	neg	neg
20155002	26	19to64	SAMN05222241	47	90687	314746	2051748	23B	1	162	0	0	0	<=	0.03	S	S	<=	0.03	S	<=	0.06	S	<=	0.06	S	S	<=	0.5	S	S	<=	0.5	S	neg	=	0.06	S	=	0.06	S	<=	1	S	<=	2	S	neg	neg
20155003	22	19to64	SAMN05222242	36	128278	225935	1990159	3	neg	180	2	3	2	<=	0.03	S	S	<=	0.03	S	<=	0.06	S	<=	0.06	S	S	<=	0.5	S	S	<=	0.5	S	neg	=	0.06	S	=	0.06	S	<=	1	S	<=	2	S	neg	neg
20155004	63	19to64	SAMN05222243	88	50024	168512	2124811	23A	neg	338	19	1	24	=	0.5	R	S	=	0.25	S	<=	0.06	S	=	0.25	S	S	<=	0.5	S	S	<=	0.5	S	ERMB	>	32	R	>	2	R	<=	1	S	<=	2	S	pos	neg
20155005	56	19to64	SAMN05222244	89	49294	193404	2092425	17F	neg	392	11	0	0	<=	0.03	S	S	<=	0.03	S	<=	0.06	S	<=	0.06	S	S	<=	0.5	S	S	<=	0.5	S	neg	=	0.06	S	=	0.06	S	<=	1	S	<=	2	S	neg	neg
20155006	81	>65	SAMN05222245	141	53006	240736	2225919	23B	neg	1373	0	1	1	=	0.25	R	S	=	0.06	S	<=	0.06	S	=	0.12	S	S	<=	0.5	S	S	<=	0.5	S	neg	=	0.06	S	=	0.06	S	<=	1	S	<=	2	S	neg	FOLP_180-ins
20155007	32	19to64	SAMN05222246	76	66347	195239	2092019	20	neg	1257	1	4	2	<=	0.03	S	S	<=	0.03	S	<=	0.06	S	<=	0.06	S	S	<=	0.5	S	S	<=	0.5	S	neg	=	0.06	S	=	0.06	S	<=	1	S	<=	2	S	neg	neg
20155008	38	19to64	SAMN05222247	68	85766	214067	2094739	20	neg	1257	1	4	2	<=	0.03	S	S	<=	0.03	S	<=	0.06	S	<=	0.06	S	S	<=	0.5	S	S	<=	0.5	S	neg	=	0.06	S	=	0.06	S	<=	1	S	<=	2	S	neg	neg
20155009	63	19to64	SAMN05222248	59	77886	187975	1980324	3	neg	180	2	0	2	<=	0.03	S	S	<=	0.03	S	<=	0.06	S	<=	0.06	S	S	<=	0.5	S	S	<=	0.5	S	neg	=	0.06	S	=	0.06	S	<=	1	S	<=	2	S	neg	neg
20155010	32	19to64	SAMN05222249	118	42643	114222	2122976	15A	neg	63	24	27	11	=	0.12	R	S	=	0.12	S	<=	0.06	S	<=	0.06	S	S	<=	0.5	S	S	<=	0.5	S	ERMB	>	32	R	>	2	R	<=	1	S	<=	2	S	pos	FOLP_178-ins
20155011	58	19to64	SAMN05222250	48	78730	280870	2176947	23B	neg	1373	0	1	1	=	0.25	R	S	=	0.06	S	<=	0.06	S	=	0.12	S	S	<=	0.5	S	S	<=	0.5	S	neg	=	0.06	S	=	0.06	S	<=	1	S	<=	2	S	neg	FOLP_180-ins
20155012	5	5to18	SAMN05222251	81	55362	129520	2115820	10A	neg	816	0	0	2	<=	0.03	S	S	<=	0.03	S	<=	0.06	S	<=	0.06	S	S	<=	0.5	S	S	<=	0.5	S	neg	=	0.06	S	=	0.06	S	<=	1	S	<=	2	S	neg	neg
20155013	55	19to64	SAMN05222252	68	77443	226083	2119311	16F	neg	10148	0	10	14	=	0.06	S	S	<=	0.03	S	<=	0.06	S	=	0.12	S	S	<=	0.5	S	S	<=	0.5	S	neg	=	0.06	S	=	0.06	S	<=	1	S	<=	2	S	neg	neg
20155014	71	>65	SAMN05222253	80	57097	128087	2026124	11A	2	62	2	6	0	<=	0.03	S	S	<=	0.03	S	<=	0.06	S	<=	0.06	S	S	<=	0.5	S	S	<=	0.5	S	neg	=	0.06	S	=	0.06	S	<=	1	S	<=	2	S	neg	neg
20155166	60	19to64	SAMN05222254	120	31139	85802	2177209	6C	1	138	2	0	3	<=	0.03	S	S	<=	0.03	S	<=	0.06	S	<=	0.06	S	S	<=	0.5	S	S	<=	0.5	S	neg	=	0.06	S	=	0.06	S	<=	1	S	<=	2	S	neg	neg
20155167	87	>65	SAMN05222255	101	42402	145896	2147463	23B	neg	1373	0	1	1	=	0.25	R	S	=	0.06	S	<=	0.06	S	=	0.12	S	S	<=	0.5	S	S	<=	0.5	S	neg	=	0.06	S	=	0.06	S	<=	1	S	<=	2	S	neg	FOLP_180-ins
20155168	81	>65	SAMN05222256	235	16786	64109	2112319	17F	neg	392	11	0	NF	<=	0.03	S	S	<=	0.03	S	<=	0.06	S	<=	0.06	S	S	<=	0.5	S	S	<=	0.5	S	neg	=	0.06	S	=	0.06	S	<=	1	S	<=	2	S	neg	neg
20155170	70	>65	SAMN05222258	141	29595	91491	2131270	34	neg	11268	0	0	2	<=	0.03	S	S	<=	0.03	S	<=	0.06	S	<=	0.06	S	S	<=	0.5	S	S	<=	0.5	S	neg	=	0.06	S	=	0.06	S	<=	1	S	<=	2	S	neg	neg
20155171	66	>65	SAMN05222259	145	30799	101255	2106786	20	neg	235	1	4	2	<=	0.03	S	S	<=	0.03	S	<=	0.06	S	<=	0.06	S	S	<=	0.5	S	S	<=	0.5	S	neg	=	0.06	S	=	0.06	S	<=	1	S	<=	2	S	neg	neg
20155172	49	19to64	SAMN05222260	125	30687	97836	2113885	9N	neg	10539	1	0	0	<=	0.03	S	S	<=	0.03	S	<=	0.06	S	<=	0.06	S	S	<=	0.5	S	S	<=	0.5	S	MEF	=	8	R	=	0.06	S	<=	1	S	<=	2	S	neg	neg
20155173	55	19to64	SAMN05222261	99	46730	117883	2063016	22F	neg	7314	1	2	2	<=	0.03	S	S	<=	0.03	S	<=	0.06	S	<=	0.06	S	S	<=	0.5	S	S	<=	0.5	S	MEF	=	8	R	=	0.06	S	<=	1	S	<=	2	S	neg	neg
20155175	52	19to64	SAMN05222262	178	20854	57098	2078752	31	neg	568	12	0	0	<=	0.03	S	S	<=	0.03	S	<=	0.06	S	<=	0.06	S	S	<=	0.5	S	S	<=	0.5	S	neg	=	0.06	S	=	0.06	S	<=	1	S	<=	2	S	neg	neg
20155177	51	19to64	SAMN05222264	124	33708	90254	2095351	9N	neg	1257	1	4	2	<=	0.03	S	S	<=	0.03	S	<=	0.06	S	<=	0.06	S	S	<=	0.5	S	S	<=	0.5	S	neg	=	0.06	S	=	0.06	S	<=	1	S	<=	2	S	neg	neg
20155178	0	0-4	SAMN05222265	109	35334	100414	2099376	23A	neg	338	0	1	48	=	0.25	R	S	=	0.25	S	<=	0.06	S	=	0.12	S	S	<=	0.5	S	S	<=	0.5	S	neg	=	0.06	S	=	0.06	S	<=	1	S	<=	2	S	neg	FOLP_177-ins
20155179	74	>65	SAMN05222266	154	26910	58619	2036338	31	neg	568	12	0	0	<=	0.03	S	S	<=	0.03	S	<=	0.06	S	<=	0.06	S	S	<=	0.5	S	S	<=	0.5	S	neg	=	0.06	S	=	0.06	S	<=	1	S	<=	2	S	neg	neg
20155181	13	5to18	SAMN05222268	71	56697	183979	2057989	22F	neg	7314	1	2	2	<=	0.03	S	S	<=	0.03	S	<=	0.06	S	<=	0.06	S	S	<=	0.5	S	S	<=	0.5	S	MEF	=	8	R	=	0.06	S	<=	1	S	<=	2	S	neg	neg
20155182	0	0-4	SAMN05222269	80	57479	149835	2043429	11A	2	62	2	6	0	<=	0.03	S	S	<=	0.03	S	<=	0.06	S	<=	0.06	S	S	<=	0.5	S	S	<=	0.5	S	neg	=	0.06	S	=	0.06	S	<=	1	S	<=	2	S	neg	neg
20155183	29	19to64	SAMN05222270	120	34382	94077	1995762	12F	neg	220	0	0	17	<=	0.03	S	S	<=	0.03	S	<=	0.06	S	<=	0.06	S	S	<=	0.5	S	S	<=	0.5	S	neg	=	0.06	S	=	0.06	S	<=	1	S	<=	2	S	neg	neg
20155184	57	19to64	SAMN05222271	66	62913	191286	2062404	11A	2	62	2	6	0	<=	0.03	S	S	<=	0.03	S	<=	0.06	S	<=	0.06	S	S	<=	0.5	S	S	<=	0.5	S	MEF	=	8	R	=	0.06	S	<=	1	S	<=	2	S	neg	neg
20155185	27	19to64	SAMN05222272	56	65309	263054	2064360	35F	neg	498	0	0	3	<=	0.03	S	S	<=	0.03	S	<=	0.06	S	<=	0.06	S	S	<=	0.5	S	S	<=	0.5	S	neg	=	0.06	S	=	0.06	S	<=	1	S	<=	2	S	neg	neg
20155186	39	19to64	SAMN05222273	51	86645	321706	2114968	6C	1	1092	6	7	8	=	0.5	R	S	=	1	S	=	0.25	S	=	0.5	S	S	<=	0.5	S	S	=	2	R	neg	=	0.06	S	=	0.06	S	<=	1	S	<=	2	S	neg	FOLA-Q1H,V3I,E14D,I20L:FOLP_195-ins
20155187	54	19to64	SAMN05222274	134	55049	249403	2088460	15A	1	3811	1	0	0	<=	0.03	S	S	<=	0.03	S	<=	0.06	S	<=	0.06	S	S	<=	0.5	S	S	<=	0.5	S	neg	=	0.06	S	=	0.06	S	<=	1	S	<=	2	S	neg	neg
20155190	77	>65	SAMN05222275	61	98306	160157	2071770	23A	neg	338	19	1	24	=	0.5	R	S	=	0.25	S	<=	0.06	S	=	0.25	S	S	<=	0.5	S	S	<=	0.5	S	ERMB	>	32	R	>	2	R	<=	1	S	<=	2	S	pos	neg
20155191	47	19to64	SAMN05222276	128	57772	200114	2044349	12F	neg	218	0	0	0	<=	0.03	S	S	<=	0.03	S	<=	0.06	S	<=	0.06	S	S	<=	0.5	S	S	<=	0.5	S	MEF	=	8	R	=	0.06	S	<=	1	S	<=	2	S	neg	neg
20155246	0	0-4	SAMN05222278	82	65368	259601	2081032	15A	neg	63	24	27	28	=	0.25	R	S	<=	0.03	S	<=	0.06	S	=	0.12	S	S	<=	0.5	S	S	<=	0.5	S	ERMB	>	32	R	>	2	R	<=	1	S	<=	2	S	pos	neg
20155247	44	19to64	SAMN05222279	81	68434	229371	2065241	15A	neg	63	24	27	28	=	0.25	R	S	<=	0.03	S	<=	0.06	S	=	0.12	S	S	<=	0.5	S	S	<=	0.5	S	ERMB	>	32	R	>	2	R	<=	1	S	<=	2	S	pos	FOLP_178-ins
20155248	45	19to64	SAMN05222280	118	46667	129209	2092185	15B	1	10161	7	8	9	=	0.25	R	S	=	0.5	S	=	0.12	S	=	0.12	S	S	<=	0.5	S	S	<=	0.5	S	MEF	=	8	R	=	0.06	S	<=	1	S	<=	2	S	neg	FOLP_177-ins:FOLP_180-ins
20155249	62	19to64	SAMN05222281	90	123390	208969	2088969	20	neg	1257	1	4	2	<=	0.03	S	S	<=	0.03	S	<=	0.06	S	<=	0.06	S	S	<=	0.5	S	S	<=	0.5	S	neg	=	0.06	S	=	0.06	S	<=	1	S	<=	2	S	neg	neg
20155250	47	19to64	SAMN05222282	34	143535	497892	2066615	33F	neg	2705	2	0	6	<=	0.03	S	S	<=	0.03	S	<=	0.06	S	<=	0.06	S	S	<=	0.5	S	S	<=	0.5	S	MEF	=	8	R	=	0.06	S	<=	1	S	<=	2	S	neg	FOLP_189-ins
20155251	81	>65	SAMN05222283	271	38899	115559	2035161	22F	neg	7314	1	2	2	<=	0.03	S	S	<=	0.03	S	<=	0.06	S	<=	0.06	S	S	<=	0.5	S	S	<=	0.5	S	MEF	=	8	R	=	0.06	S	<=	1	S	<=	2	S	neg	neg
20155252	0	0-4	SAMN05222284	50	86574	260849	2037203	35B	1	558	4	7	7	=	2	R	S	=	4	I	=	0.5	I	=	1	I	S	=	1	I	S	>	2	R	MEF	=	8	R	=	0.06	S	<=	1	S	<=	2	S	neg	neg
20155253	91	>65	SAMN05222285	80	59329	183571	2053518	22F	neg	11278	1	2	2	<=	0.03	S	S	<=	0.03	S	<=	0.06	S	<=	0.06	S	S	<=	0.5	S	S	<=	0.5	S	MEF	=	8	R	=	0.06	S	<=	1	S	<=	2	S	neg	neg
20155254	51	19to64	SAMN05222286	111	58835	152293	1999698	7F	2	191	2	0	2	<=	0.03	S	S	<=	0.03	S	<=	0.06	S	<=	0.06	S	S	<=	0.5	S	S	<=	0.5	S	neg	=	0.06	S	=	0.06	S	<=	1	S	<=	2	S	neg	neg
20155256	59	19to64	SAMN05222288	158	52853	154884	2006389	11A	2	62	2	6	0	<=	0.03	S	S	<=	0.03	S	<=	0.06	S	<=	0.06	S	S	<=	0.5	S	S	<=	0.5	S	neg	=	0.06	S	=	0.06	S	<=	1	S	<=	2	S	neg	neg
20155257	38	19to64	SAMN05222289	53	84156	363873	2086150	9N	neg	66	6	0	167	=	0.25	R	S	=	0.06	S	<=	0.06	S	=	0.12	S	S	<=	0.5	S	S	<=	0.5	S	neg	=	0.06	S	=	0.06	S	<=	1	S	<=	2	S	neg	neg
20155259	32	19to64	SAMN05222291	53	72695	152473	1981830	12F	neg	220	0	0	2	<=	0.03	S	S	<=	0.03	S	<=	0.06	S	<=	0.06	S	S	<=	0.5	S	S	<=	0.5	S	neg	=	0.06	S	=	0.06	S	<=	1	S	<=	2	S	neg	neg
20155260	37	19to64	SAMN05222292	97	56426	147719	2108891	12F	neg	989	12	4	3	<=	0.03	S	S	<=	0.03	S	<=	0.06	S	<=	0.06	S	S	<=	0.5	S	S	<=	0.5	S	neg	=	0.06	S	=	0.06	S	<=	1	S	<=	2	S	neg	FOLA-I20L:FOLP_178-ins
20155277	4	0-4	SAMN05222293	69	90172	215892	2106522	23A	neg	338	0	1	1	=	0.25	R	S	=	0.06	S	<=	0.06	S	=	0.12	S	S	<=	0.5	S	S	<=	0.5	S	neg	=	0.06	S	=	0.06	S	<=	1	S	<=	2	S	neg	neg
20155279	46	19to64	SAMN05222294	157	45137	123231	2099201	23A	neg	338	0	1	1	=	0.25	R	S	=	0.06	S	<=	0.06	S	=	0.12	S	S	<=	0.5	S	S	<=	0.5	S	neg	=	0.06	S	=	0.06	S	<=	1	S	<=	2	S	neg	neg
20155280	70	>65	SAMN05222295	86	59812	158859	2116874	23A	neg	338	19	1	24	=	0.5	R	S	=	0.25	S	<=	0.06	S	=	0.25	S	S	<=	0.5	S	S	<=	0.5	S	ERMB	>	32	R	>	2	R	<=	1	S	<=	2	S	pos	neg
20155281	93	>65	SAMN05222296	71	87040	201515	2119153	15C	neg	199	2	0	2	<=	0.03	S	S	<=	0.03	S	<=	0.06	S	<=	0.06	S	S	<=	0.5	S	S	<=	0.5	S	neg	=	0.06	S	=	0.06	S	<=	1	S	<=	2	S	neg	neg
20155282	76	>65	SAMN05222297	177	45957	111216	2041271	3	neg	180	2	0	2	<=	0.03	S	S	<=	0.03	S	<=	0.06	S	<=	0.06	S	S	<=	0.5	S	S	<=	0.5	S	ERMB:ERMBS:ERMBUP	=	0.06	S	=	0.06	S	<=	1	S	<=	2	S	neg	neg
20155283	72	>65	SAMN05222298	122	58146	358119	1994564	8	neg	1480	3	5	5	<=	0.03	S	S	<=	0.03	S	<=	0.06	S	<=	0.06	S	S	<=	0.5	S	S	<=	0.5	S	neg	=	0.06	S	=	0.06	S	<=	1	S	<=	2	S	neg	neg
20155284	59	19to64	SAMN05222299	94	77122	241785	2118414	15A	neg	11279	67	27	35	=	0.5	R	S	=	0.25	S	=	0.12	S	=	0.25	S	S	<=	0.5	S	S	<=	0.5	S	ERMB	>	32	R	>	2	R	<=	1	S	<=	2	S	pos	FOLA-Q1H,Q11H,E14D,I20L:FOLP_178-ins
20155285	78	>65	SAMN05222300	110	47702	116749	2035867	35B	1	558	4	7	7	=	2	R	S	=	4	I	=	0.5	I	=	1	I	S	=	1	I	S	>	2	R	MEF	=	8	R	=	0.06	S	<=	1	S	<=	2	S	neg	neg
20155286	52	19to64	SAMN05222301	107	77354	254055	1988724	3	neg	180	2	3	2	<=	0.03	S	S	<=	0.03	S	<=	0.06	S	<=	0.06	S	S	<=	0.5	S	S	<=	0.5	S	neg	=	0.06	S	=	0.06	S	<=	1	S	<=	2	S	neg	neg
20155287	79	>65	SAMN05222302	26	205453	466848	1992705	3	neg	1119	0	0	2	<=	0.03	S	S	<=	0.03	S	<=	0.06	S	<=	0.06	S	S	<=	0.5	S	S	<=	0.5	S	neg	=	0.06	S	=	0.06	S	<=	1	S	<=	2	S	neg	neg
20155288	61	19to64	SAMN05222303	46	82029	240833	2056920	15B	neg	199	1	0	6	<=	0.03	S	S	<=	0.03	S	<=	0.06	S	<=	0.06	S	S	<=	0.5	S	S	<=	0.5	S	neg	=	0.06	S	=	0.06	S	<=	1	S	<=	2	S	neg	neg
20155289	ND	ND	SAMN05222304	61	90488	182966	2125611	15A	1	3811	1	0	0	<=	0.03	S	S	<=	0.03	S	<=	0.06	S	<=	0.06	S	S	<=	0.5	S	S	<=	0.5	S	neg	=	0.06	S	=	0.06	S	<=	1	S	<=	2	S	neg	neg
20155290	37	19to64	SAMN05222305	114	52082	207545	2179181	7C	1	7260	2	4	6	<=	0.03	S	S	<=	0.03	S	<=	0.06	S	<=	0.06	S	S	<=	0.5	S	S	<=	0.5	S	neg	=	0.06	S	=	0.06	S	<=	1	S	<=	2	S	neg	neg
20155291	67	>65	SAMN05222306	53	101583	155720	2074593	6C	neg	639	2	0	0	<=	0.03	S	S	<=	0.03	S	<=	0.06	S	<=	0.06	S	S	<=	0.5	S	S	<=	0.5	S	neg	=	0.06	S	=	0.06	S	<=	1	S	<=	2	S	neg	neg
20155292	53	19to64	SAMN05222307	80	74488	127473	2148897	19A	1	695	8	0	11	=	0.12	R	S	=	0.06	S	<=	0.06	S	<=	0.06	S	S	<=	0.5	S	S	<=	0.5	S	neg	=	0.06	S	=	0.06	S	<=	1	S	<=	2	S	neg	neg
20155293	87	>65	SAMN05222308	114	34096	148289	2077091	31	neg	568	12	0	0	<=	0.03	S	S	<=	0.03	S	<=	0.06	S	<=	0.06	S	S	<=	0.5	S	S	<=	0.5	S	neg	=	0.06	S	=	0.06	S	<=	1	S	<=	2	S	neg	neg
20155294	92	>65	SAMN05222309	56	98440	389327	2089176	15A	1	3811	1	0	0	<=	0.03	S	S	<=	0.03	S	<=	0.06	S	<=	0.06	S	S	<=	0.5	S	S	<=	0.5	S	neg	=	0.06	S	=	0.06	S	<=	1	S	<=	2	S	neg	neg
20155295	59	19to64	SAMN05222310	117	46804	207500	2077798	22F	neg	insufficient quality	1	2	2	<=	0.03	S	S	<=	0.03	S	<=	0.06	S	<=	0.06	S	S	<=	0.5	S	S	<=	0.5	S	neg	=	0.06	S	=	0.06	S	<=	1	S	<=	2	S	neg	neg
20155296	45	19to64	SAMN05222311	87	55913	146163	2085464	9V	1	11583	1	0	0	<=	0.03	S	S	<=	0.03	S	<=	0.06	S	<=	0.06	S	S	<=	0.5	S	S	<=	0.5	S	neg	=	0.06	S	=	0.06	S	<=	1	S	<=	2	S	neg	neg
20155297	67	>65	SAMN05222312	49	113993	249689	2065150	15A	neg	63	24	27	28	=	0.25	R	S	<=	0.03	S	<=	0.06	S	=	0.12	S	S	<=	0.5	S	S	<=	0.5	S	ERMB	>	32	R	>	2	R	<=	1	S	<=	2	S	pos	FOLP_178-ins
20155298	84	>65	SAMN05222313	37	132719	358516	2133168	6C	neg	473	19	34	44	=	0.5	R	S	=	0.25	S	<=	0.06	S	=	0.25	S	S	<=	0.5	S	S	=	1	I	MEF	=	8	R	=	0.06	S	<=	1	S	<=	2	S	neg	neg
20155299	83	>65	SAMN05222314	48	123342	299297	2124768	6C	1	138	2	0	3	<=	0.03	S	S	<=	0.03	S	<=	0.06	S	<=	0.06	S	S	<=	0.5	S	S	<=	0.5	S	neg	=	0.06	S	=	0.06	S	<=	1	S	<=	2	S	neg	neg
20155300	57	19to64	SAMN05222315	81	84473	213487	2063398	16F	neg	995	9	4	3	<=	0.03	S	S	<=	0.03	S	<=	0.06	S	<=	0.06	S	S	<=	0.5	S	S	<=	0.5	S	neg	=	0.06	S	=	0.06	S	<=	1	S	<=	2	S	neg	neg
20155301	77	>65	SAMN05222316	36	123831	275657	2008754	35B	1	558	4	7	7	=	2	R	S	=	4	I	=	0.5	I	=	1	I	S	=	1	I	S	>	2	R	MEF	=	8	R	=	0.06	S	<=	1	S	<=	2	S	neg	neg
20155302	56	19to64	SAMN05222317	21	219576	573588	2053874	33F	neg	100	2	0	6	<=	0.03	S	S	<=	0.03	S	<=	0.06	S	<=	0.06	S	S	<=	0.5	S	S	<=	0.5	S	MEF	=	8	R	=	0.06	S	<=	1	S	<=	2	S	neg	FOLP_189-ins
20155303	67	>65	SAMN05222318	25	573299	623903	2055735	33F	neg	100	2	0	6	<=	0.03	S	S	<=	0.03	S	<=	0.06	S	<=	0.06	S	S	<=	0.5	S	S	<=	0.5	S	MEF	=	8	R	=	0.06	S	<=	1	S	<=	2	S	neg	FOLP_189-ins
20155304	52	19to64	SAMN05222319	86	69300	183902	2119487	15A	1	3811	1	0	0	<=	0.03	S	S	<=	0.03	S	<=	0.06	S	<=	0.06	S	S	<=	0.5	S	S	<=	0.5	S	neg	=	0.06	S	=	0.06	S	<=	1	S	<=	2	S	neg	neg
20155305	65	>65	SAMN05222320	34	240717	617931	2025886	3	neg	180	2	3	166	<=	0.03	S	S	<=	0.03	S	<=	0.06	S	<=	0.06	S	S	<=	0.5	S	S	<=	0.5	S	neg	=	0.06	S	=	0.06	S	<=	1	S	<=	2	S	neg	neg
20155306	56	19to64	SAMN05222321	74	62590	124751	2084246	15A	neg	63	24	27	28	=	0.25	R	S	<=	0.03	S	<=	0.06	S	=	0.12	S	S	<=	0.5	S	S	<=	0.5	S	ERMB	>	32	R	>	2	R	<=	1	S	<=	2	S	pos	neg
20155307	11	5to18	SAMN05222322	66	63574	141547	2009374	7F	2	191	2	0	2	<=	0.03	S	S	<=	0.03	S	<=	0.06	S	<=	0.06	S	S	<=	0.5	S	S	<=	0.5	S	neg	=	0.06	S	=	0.06	S	<=	1	S	<=	2	S	neg	neg
20155308	61	19to64	SAMN05222323	51	99432	242533	2055860	22F	neg	7314	1	2	2	<=	0.03	S	S	<=	0.03	S	<=	0.06	S	<=	0.06	S	S	<=	0.5	S	S	<=	0.5	S	MEF	=	8	R	=	0.06	S	<=	1	S	<=	2	S	neg	neg
20155309	36	19to64	SAMN05222324	52	124673	241845	2072840	6C	neg	138	2	0	3	<=	0.03	S	S	<=	0.03	S	<=	0.06	S	<=	0.06	S	S	<=	0.5	S	S	<=	0.5	S	neg	=	0.06	S	=	0.06	S	<=	1	S	<=	2	S	neg	neg
20155310	64	19to64	SAMN05222325	65	103130	171099	2104448	10A	neg	97	0	40	2	<=	0.03	S	S	<=	0.03	S	<=	0.06	S	<=	0.06	S	S	<=	0.5	S	S	<=	0.5	S	neg	=	0.06	S	=	0.06	S	<=	1	S	<=	2	S	neg	neg
20155311	94	>65	SAMN05222326	70	66160	247903	2112855	15A	neg	63	24	27	165	=	0.25	R	S	=	0.12	S	<=	0.06	S	=	0.12	S	S	<=	0.5	S	S	<=	0.5	S	ERMB	>	32	R	>	2	R	<=	1	S	<=	2	S	pos	FOLP_178-ins
20155312	73	>65	SAMN05222327	46	112196	216311	1977241	3	neg	180	2	0	2	<=	0.03	S	S	<=	0.03	S	<=	0.06	S	<=	0.06	S	S	<=	0.5	S	S	<=	0.5	S	neg	=	0.06	S	=	0.06	S	<=	1	S	<=	2	S	neg	neg
20155313	85	>65	SAMN05222328	377	41346	113798	2045520	19F	neg	3016	2	0	2	<=	0.03	S	S	<=	0.03	S	<=	0.06	S	<=	0.06	S	S	<=	0.5	S	S	<=	0.5	S	neg	=	0.06	S	=	0.06	S	<=	1	S	<=	2	S	neg	neg
20155314	63	19to64	SAMN05222329	25	177623	555143	2064537	33F	neg	2705	2	0	6	<=	0.03	S	S	<=	0.03	S	<=	0.06	S	<=	0.06	S	S	<=	0.5	S	S	<=	0.5	S	MEF	=	8	R	=	0.06	S	<=	1	S	<=	2	S	neg	FOLP_189-ins
20155315	50	19to64	SAMN05222330	104	75961	245237	2051203	3	1:2	271	17	16	47	=	2	R	S	=	1	S	=	0.5	I	=	1	I	S	<=	0.5	S	S	>	2	R	ERMB:MEF	>	32	R	>	2	R	<=	1	S	<=	2	S	pos	FOLA-Q1Y,Q11H,E14D,I20L:FOLP_177-ins:FOLP_180-ins
20155316	66	>65	SAMN05222331	43	125144	309885	2079009	23A	neg	338	19	1	24	=	0.5	R	S	=	0.25	S	<=	0.06	S	=	0.25	S	S	<=	0.5	S	S	<=	0.5	S	ERMB	>	32	R	>	2	R	<=	1	S	<=	2	S	pos	neg
20155317	75	>65	SAMN05222332	66	110986	306115	2103863	23A	neg	338	0	1	1	=	0.25	R	S	=	0.06	S	<=	0.06	S	=	0.12	S	S	<=	0.5	S	S	<=	0.5	S	neg	=	0.06	S	=	0.06	S	<=	1	S	<=	2	S	neg	FOLP_195-ins
20155318	86	>65	SAMN05222333	27	308504	437465	1981411	3	neg	180	2	3	2	<=	0.03	S	S	<=	0.03	S	<=	0.06	S	<=	0.06	S	S	<=	0.5	S	S	<=	0.5	S	neg	=	0.06	S	=	0.06	S	<=	1	S	<=	2	S	neg	neg
20155319	65	>65	SAMN05222334	26	205938	636917	2067804	33F	neg	2705	2	0	6	<=	0.03	S	S	<=	0.03	S	<=	0.06	S	<=	0.06	S	S	<=	0.5	S	S	<=	0.5	S	MEF	=	8	R	=	0.06	S	<=	1	S	<=	2	S	neg	FOLP_189-ins
20155320	67	>65	SAMN05222335	56	77810	261129	2071008	22F	neg	433	1	2	2	<=	0.03	S	S	<=	0.03	S	<=	0.06	S	<=	0.06	S	S	<=	0.5	S	S	<=	0.5	S	neg	=	0.06	S	=	0.06	S	<=	1	S	<=	2	S	neg	neg
20155321	51	19to64	SAMN05222336	108	67466	176160	2195066	19A	1	695	8	0	11	=	0.12	R	S	=	0.06	S	<=	0.06	S	<=	0.06	S	S	<=	0.5	S	S	<=	0.5	S	neg	=	0.06	S	=	0.06	S	<=	1	S	<=	2	S	neg	neg
20155322	97	>65	SAMN05222337	35	151878	331107	2044052	3	neg	180	2	0	2	<=	0.03	S	S	<=	0.03	S	<=	0.06	S	<=	0.06	S	S	<=	0.5	S	S	<=	0.5	S	ERMB:ERMBS:ERMBUP	=	0.06	S	=	0.06	S	<=	1	S	<=	2	S	neg	neg
20155323	88	>65	SAMN05222338	91	91164	185970	2108815	6C	neg	1292	19	31	8	=	1	R	S	=	1	S	=	0.12	S	=	0.25	S	S	<=	0.5	S	S	=	2	R	MEF	=	8	R	=	0.06	S	<=	1	S	<=	2	S	neg	FOLA-Q1H,I20L:FOLP_173-ins
20155324	59	19to64	SAMN05222339	74	41144	144435	2016367	35B	1	558	4	7	7	=	2	R	S	=	4	I	=	0.5	I	=	1	I	S	=	1	I	S	>	2	R	MEF	=	8	R	=	0.06	S	<=	1	S	<=	2	S	neg	neg
20155325	57	19to64	SAMN05222340	38	177866	306098	2076677	23A	neg	338	19	1	24	=	0.5	R	S	=	0.25	S	<=	0.06	S	=	0.25	S	S	<=	0.5	S	S	<=	0.5	S	ERMB	>	32	R	>	2	R	<=	1	S	<=	2	S	pos	neg
20155326	68	>65	SAMN05222341	47	129149	322611	2093577	20	neg	1257	1	4	2	<=	0.03	S	S	<=	0.03	S	<=	0.06	S	<=	0.06	S	S	<=	0.5	S	S	<=	0.5	S	neg	=	0.06	S	=	0.06	S	<=	1	S	<=	2	S	neg	neg
20155327	19	19to64	SAMN05222342	31	167095	499385	2011909	3	neg	180	2	3	2	<=	0.03	S	S	<=	0.03	S	<=	0.06	S	<=	0.06	S	S	<=	0.5	S	S	<=	0.5	S	neg	=	0.06	S	=	0.06	S	<=	1	S	<=	2	S	neg	neg
20155328	65	>65	SAMN05222343	53	90527	336792	2064218	19A	1:2	11577	13	11	16	=	4	R	I	=	8	R	=	1	R	=	2	R	I	=	2	R	I	>	2	R	ERMB:MEF	>	32	R	>	2	R	<=	1	S	<=	2	S	pos	FOLA-Q1Y,Q11H,E14D,I20L:FOLP_195-ins
20155329	48	19to64	SAMN05222344	114	85067	160181	2023543	3	neg	180	2	3	2	<=	0.03	S	S	<=	0.03	S	<=	0.06	S	<=	0.06	S	S	<=	0.5	S	S	<=	0.5	S	neg	=	0.06	S	=	0.06	S	<=	1	S	<=	2	S	neg	neg
20155330	61	19to64	SAMN05222345	293	37680	158899	2022516	22F	neg	433	1	2	2	<=	0.03	S	S	<=	0.03	S	<=	0.06	S	<=	0.06	S	S	<=	0.5	S	S	<=	0.5	S	neg	=	0.06	S	=	0.06	S	<=	1	S	<=	2	S	neg	neg
20155331	82	>65	SAMN05222346	131	71318	148250	2194647	19A	1	695	8	0	11	=	0.12	R	S	=	0.06	S	<=	0.06	S	<=	0.06	S	S	<=	0.5	S	S	<=	0.5	S	neg	=	0.06	S	=	0.06	S	<=	1	S	<=	2	S	neg	neg
20155332	58	19to64	SAMN05222347	54	77765	216967	2070498	22F	neg	433	1	2	2	<=	0.03	S	S	<=	0.03	S	<=	0.06	S	<=	0.06	S	S	<=	0.5	S	S	<=	0.5	S	neg	=	0.06	S	=	0.06	S	<=	1	S	<=	2	S	neg	neg
20155333	68	>65	SAMN05222348	47	126347	348102	2111574	16F	neg	1840	0	10	2	<=	0.03	S	S	<=	0.03	S	<=	0.06	S	<=	0.06	S	S	<=	0.5	S	S	<=	0.5	S	neg	=	0.06	S	=	0.06	S	<=	1	S	<=	2	S	neg	neg
20155334	37	19to64	SAMN05222349	49	194450	420449	1989858	3	neg	180	2	3	2	<=	0.03	S	S	<=	0.03	S	<=	0.06	S	<=	0.06	S	S	<=	0.5	S	S	<=	0.5	S	neg	=	0.06	S	=	0.06	S	<=	1	S	<=	2	S	neg	neg
20155335	64	19to64	SAMN05222350	53	92111	187033	2081487	9N	neg	405	23	0	0	<=	0.03	S	S	<=	0.03	S	<=	0.06	S	<=	0.06	S	S	<=	0.5	S	S	<=	0.5	S	neg	=	0.06	S	=	0.06	S	<=	1	S	<=	2	S	neg	neg
20155336	66	>65	SAMN05222351	41	100647	206379	1981058	12F	neg	220	0	0	2	<=	0.03	S	S	<=	0.03	S	<=	0.06	S	<=	0.06	S	S	<=	0.5	S	S	<=	0.5	S	neg	=	0.06	S	=	0.06	S	<=	1	S	<=	2	S	neg	neg
20155337	64	19to64	SAMN05222352	44	79324	220315	2063462	3	neg	1116	0	26	2	<=	0.03	S	S	<=	0.03	S	<=	0.06	S	<=	0.06	S	S	<=	0.5	S	S	<=	0.5	S	neg	=	0.06	S	=	0.06	S	<=	1	S	<=	2	S	neg	neg
20155338	64	19to64	SAMN05222353	73	86918	260833	2061091	11A	2	62	2	6	0	<=	0.03	S	S	<=	0.03	S	<=	0.06	S	<=	0.06	S	S	<=	0.5	S	S	<=	0.5	S	neg	=	0.06	S	=	0.06	S	<=	1	S	<=	2	S	neg	neg
20155340	90	>65	SAMN05222354	30	117163	180536	2056141	33F	neg	100	2	0	6	<=	0.03	S	S	<=	0.03	S	<=	0.06	S	<=	0.06	S	S	<=	0.5	S	S	<=	0.5	S	MEF	=	8	R	=	0.06	S	<=	1	S	<=	2	S	neg	FOLP_189-ins
20155341	79	>65	SAMN05222355	38	106137	166144	2007979	35B	1	558	4	7	7	=	2	R	S	=	4	I	=	0.5	I	=	1	I	S	=	1	I	S	>	2	R	MEF	=	8	R	=	0.06	S	<=	1	S	<=	2	S	neg	neg
20155342	50	19to64	SAMN05222356	37	185358	341250	1994687	8	neg	1480	3	5	5	<=	0.03	S	S	<=	0.03	S	<=	0.06	S	<=	0.06	S	S	<=	0.5	S	S	<=	0.5	S	neg	=	0.06	S	=	0.06	S	<=	1	S	<=	2	S	neg	neg
20155343	56	19to64	SAMN05222357	32	155069	469672	1994167	8	neg	1480	3	5	5	<=	0.03	S	S	<=	0.03	S	<=	0.06	S	<=	0.06	S	S	<=	0.5	S	S	<=	0.5	S	neg	=	0.06	S	=	0.06	S	<=	1	S	<=	2	S	neg	neg
20155344	59	19to64	SAMN05222358	219	52951	115926	2043814	16F	neg	995	9	4	3	<=	0.03	S	S	<=	0.03	S	<=	0.06	S	<=	0.06	S	S	<=	0.5	S	S	<=	0.5	S	RPLD1-5K	=	0.06	S	=	0.06	S	<=	1	S	<=	2	S	neg	neg
20155345	80	>65	SAMN05222359	94	48985	169309	2016073	31	neg	444	12	0	0	<=	0.03	S	S	<=	0.03	S	<=	0.06	S	<=	0.06	S	S	<=	0.5	S	S	<=	0.5	S	neg	=	0.06	S	=	0.06	S	<=	1	S	<=	2	S	neg	neg
20155346	72	>65	SAMN05222360	146	58265	173444	2009368	11A	2	62	2	6	0	<=	0.03	S	S	<=	0.03	S	<=	0.06	S	<=	0.06	S	S	<=	0.5	S	S	<=	0.5	S	neg	=	0.06	S	=	0.06	S	<=	1	S	<=	2	S	neg	neg
20155348	57	19to64	SAMN05222362	65	73061	187118	2064445	17F	neg	392	0	0	0	<=	0.03	S	S	<=	0.03	S	<=	0.06	S	<=	0.06	S	S	<=	0.5	S	S	<=	0.5	S	neg	=	0.06	S	=	0.06	S	<=	1	S	<=	2	S	neg	neg
20155349	50	19to64	SAMN05222363	28	185904	431666	2045026	9N	neg	66	1	0	0	<=	0.03	S	S	<=	0.03	S	<=	0.06	S	<=	0.06	S	S	<=	0.5	S	S	<=	0.5	S	neg	=	0.06	S	=	0.06	S	<=	1	S	<=	2	S	neg	neg
20155350	53	19to64	SAMN05222364	102	65292	267655	2085420	19A	neg	63	79	27	35	=	0.25	R	S	=	0.25	S	<=	0.06	S	=	0.25	S	S	<=	0.5	S	S	<=	0.5	S	ERMB	>	32	R	>	2	R	<=	1	S	<=	2	S	pos	neg
20155351	58	19to64	SAMN05222365	31	148350	308571	1992323	3	neg	505	2	0	2	<=	0.03	S	S	<=	0.03	S	<=	0.06	S	<=	0.06	S	S	<=	0.5	S	S	<=	0.5	S	neg	=	0.06	S	=	0.06	S	<=	1	S	<=	2	S	neg	neg
20155352	65	>65	SAMN05222366	83	65454	194081	2155375	19A	1	695	8	0	11	=	0.12	R	S	=	0.06	S	<=	0.06	S	<=	0.06	S	S	<=	0.5	S	S	<=	0.5	S	neg	=	0.06	S	=	0.06	S	<=	1	S	<=	2	S	neg	neg
20155353	65	>65	SAMN05222367	72	53278	178042	2068982	6C	1	146	23	0	3	<=	0.03	S	S	<=	0.03	S	<=	0.06	S	<=	0.06	S	S	<=	0.5	S	S	<=	0.5	S	neg	=	0.06	S	=	0.06	S	<=	1	S	<=	2	S	neg	FOLP_169-ins
20155354	31	19to64	SAMN05222368	65	85942	184506	2061098	11A	2	62	2	6	0	<=	0.03	S	S	<=	0.03	S	<=	0.06	S	<=	0.06	S	S	<=	0.5	S	S	<=	0.5	S	MEF	=	8	R	=	0.06	S	<=	1	S	<=	2	S	neg	neg
20155422	58	19to64	SAMN05222369	56	82814	111104	2018734	35B	1	558	4	7	7	=	2	R	S	=	4	I	=	0.5	I	=	1	I	S	=	1	I	S	>	2	R	MEF	=	8	R	=	0.06	S	<=	1	S	<=	2	S	neg	neg
20155424	45	19to64	SAMN05222370	72	61308	221812	2050879	35B	1	558	4	7	7	=	2	R	S	=	4	I	=	0.5	I	=	1	I	S	=	1	I	S	>	2	R	MEF	=	8	R	=	0.06	S	<=	1	S	<=	2	S	neg	neg
20155425	66	>65	SAMN05222371	50	72083	343846	2023652	11A	2	62	2	6	0	<=	0.03	S	S	<=	0.03	S	<=	0.06	S	<=	0.06	S	S	<=	0.5	S	S	<=	0.5	S	MEF	=	8	R	=	0.06	S	<=	1	S	<=	2	S	neg	neg
20155426	30	19to64	SAMN05222372	33	195869	349668	1987761	3	neg	180	2	3	2	<=	0.03	S	S	<=	0.03	S	<=	0.06	S	<=	0.06	S	S	<=	0.5	S	S	<=	0.5	S	neg	=	0.06	S	=	0.06	S	<=	1	S	<=	2	S	neg	neg
20155427	53	19to64	SAMN05222373	69	103106	320240	2075513	19A	1:2	1451	13	11	16	=	4	R	I	=	8	R	=	1	R	=	2	R	I	=	2	R	I	>	2	R	ERMB:MEF	>	32	R	>	2	R	<=	1	S	<=	2	S	pos	FOLA-Q1Y,Q11H,E14D,I20L:FOLP_195-ins
20155428	85	>65	SAMN05222374	62	65262	196522	1998808	22F	neg	698	0	2	0	<=	0.03	S	S	<=	0.03	S	<=	0.06	S	<=	0.06	S	S	<=	0.5	S	S	<=	0.5	S	neg	=	0.06	S	=	0.06	S	<=	1	S	<=	2	S	neg	neg
20155429	53	19to64	SAMN05222375	39	148390	322886	2073776	6C	neg	11607	2	0	3	<=	0.03	S	S	<=	0.03	S	<=	0.06	S	<=	0.06	S	S	<=	0.5	S	S	<=	0.5	S	MEF	=	8	R	=	0.06	S	<=	1	S	<=	2	S	neg	neg
20155430	68	>65	SAMN05222376	74	63107	132631	2111138	34	neg	547	0	0	2	<=	0.03	S	S	<=	0.03	S	<=	0.06	S	<=	0.06	S	S	<=	0.5	S	S	<=	0.5	S	neg	=	0.06	S	=	0.06	S	<=	1	S	<=	2	S	neg	neg
20155431	65	>65	SAMN05222377	59	95387	261918	2074834	15B	neg	4262	2	0	2	<=	0.03	S	S	<=	0.03	S	<=	0.06	S	<=	0.06	S	S	<=	0.5	S	S	<=	0.5	S	MEF	=	8	R	=	0.06	S	<=	1	S	<=	2	S	neg	neg
20155432	59	19to64	SAMN05222378	103	43859	96145	2146213	38	neg	393	2	4	0	<=	0.03	S	S	<=	0.03	S	<=	0.06	S	<=	0.06	S	S	<=	0.5	S	S	<=	0.5	S	neg	=	0.06	S	=	0.06	S	<=	1	S	<=	2	S	neg	neg
20155433	87	>65	SAMN05222379	68	69360	177836	2071777	22F	neg	433	1	2	2	<=	0.03	S	S	<=	0.03	S	<=	0.06	S	<=	0.06	S	S	<=	0.5	S	S	<=	0.5	S	neg	=	0.06	S	=	0.06	S	<=	1	S	<=	2	S	neg	neg
20155434	51	19to64	SAMN05222380	83	69310	250172	2148220	22F	neg	433	1	2	2	<=	0.03	S	S	<=	0.03	S	<=	0.06	S	<=	0.06	S	S	<=	0.5	S	S	<=	0.5	S	neg	=	0.06	S	=	0.06	S	<=	1	S	<=	2	S	neg	neg
20155435	40	19to64	SAMN05222381	65	81005	318475	2118919	19F	1	177	23	0	139	<=	0.03	S	S	<=	0.03	S	<=	0.06	S	<=	0.06	S	S	<=	0.5	S	S	<=	0.5	S	neg	=	0.06	S	=	0.06	S	<=	1	S	<=	2	S	neg	FOLP_177-ins
20155436	61	19to64	SAMN05222382	89	37048	142745	2030759	6B	1	558	4	7	7	=	2	R	S	=	4	I	=	0.5	I	=	1	I	S	=	1	I	S	>	2	R	neg	=	0.06	S	=	0.06	S	<=	1	S	<=	2	S	neg	FOLA-Q1H,I20L:FOLP_178-ins
20155437	73	>65	SAMN05222383	106	96344	308674	2039465	3	neg	180	2	3	2	<=	0.03	S	S	<=	0.03	S	<=	0.06	S	<=	0.06	S	S	<=	0.5	S	S	<=	0.5	S	neg	=	0.06	S	=	0.06	S	<=	1	S	<=	2	S	neg	neg
20155438	91	>65	SAMN05222384	80	62950	126675	2020896	31	neg	8289	12	0	0	<=	0.03	S	S	<=	0.03	S	<=	0.06	S	<=	0.06	S	S	<=	0.5	S	S	<=	0.5	S	neg	=	0.06	S	=	0.06	S	<=	1	S	<=	2	S	neg	neg
20155439	42	19to64	SAMN05222385	67	72151	172729	2074148	19A	neg	1673	0	29	11	=	0.12	R	S	=	0.12	S	<=	0.06	S	<=	0.06	S	S	<=	0.5	S	S	<=	0.5	S	neg	=	0.06	S	=	0.06	S	<=	1	S	<=	2	S	neg	neg
20155440	53	19to64	SAMN05222386	50	75021	250148	1980183	3	neg	180	2	0	2	<=	0.03	S	S	<=	0.03	S	<=	0.06	S	<=	0.06	S	S	<=	0.5	S	S	<=	0.5	S	neg	=	0.06	S	=	0.06	S	<=	1	S	<=	2	S	neg	neg
20155441	45	19to64	SAMN05222387	96	46385	114858	2015188	7F	2	191	2	0	2	<=	0.03	S	S	<=	0.03	S	<=	0.06	S	<=	0.06	S	S	<=	0.5	S	S	<=	0.5	S	neg	=	0.06	S	=	0.06	S	<=	1	S	<=	2	S	neg	neg
20155442	68	>65	SAMN05222388	67	66467	174363	2072741	22F	neg	433	1	2	2	<=	0.03	S	S	<=	0.03	S	<=	0.06	S	<=	0.06	S	S	<=	0.5	S	S	<=	0.5	S	neg	=	0.06	S	=	0.06	S	<=	1	S	<=	2	S	neg	neg
20155443	47	19to64	SAMN05222389	46	122795	311112	2065450	23A	neg	338	0	1	1	=	0.25	R	S	=	0.06	S	<=	0.06	S	=	0.12	S	S	<=	0.5	S	S	<=	0.5	S	MEF	=	8	R	=	0.06	S	<=	1	S	<=	2	S	neg	neg
20155444	88	>65	SAMN05222390	55	129770	376863	2123047	6C	1	11582	2	0	3	<=	0.03	S	S	<=	0.03	S	<=	0.06	S	<=	0.06	S	S	<=	0.5	S	S	<=	0.5	S	neg	=	0.06	S	=	0.06	S	<=	1	S	<=	2	S	neg	neg
20155445	62	19to64	SAMN05222391	68	76451	142688	1988818	3	neg	180	2	3	2	<=	0.03	S	S	<=	0.03	S	<=	0.06	S	<=	0.06	S	S	<=	0.5	S	S	<=	0.5	S	neg	=	0.06	S	=	0.06	S	<=	1	S	<=	2	S	neg	neg
20155447	69	>65	SAMN05222392	46	95048	366511	2047762	24A/B/F	neg	11100	2	103	171	=	0.25	R	S	=	0.06	S	<=	0.06	S	=	0.12	S	S	<=	0.5	S	S	<=	0.5	S	neg	=	0.06	S	=	0.06	S	<=	1	S	<=	2	S	neg	neg
20155448	58	19to64	SAMN05222393	67	75830	142799	2069791	22F	neg	4553	1	2	2	<=	0.03	S	S	<=	0.03	S	<=	0.06	S	<=	0.06	S	S	<=	0.5	S	S	<=	0.5	S	neg	=	0.06	S	=	0.06	S	<=	1	S	<=	2	S	neg	neg
20155449	78	>65	SAMN05222394	62	64823	250580	2094361	9N	neg	632	1	0	0	<=	0.03	S	S	<=	0.03	S	<=	0.06	S	<=	0.06	S	S	<=	0.5	S	S	<=	0.5	S	neg	=	0.06	S	=	0.06	S	<=	1	S	<=	2	S	neg	neg
20155450	69	>65	SAMN05222395	66	104445	376877	2074738	6C	neg	138	2	0	3	<=	0.03	S	S	<=	0.03	S	<=	0.06	S	<=	0.06	S	S	<=	0.5	S	S	<=	0.5	S	neg	=	0.06	S	=	0.06	S	<=	1	S	<=	2	S	neg	neg
20155451	76	>65	SAMN05222396	70	74453	192955	1975320	3	neg	180	2	0	2	<=	0.03	S	S	<=	0.03	S	<=	0.06	S	<=	0.06	S	S	<=	0.5	S	S	<=	0.5	S	neg	=	0.06	S	=	0.06	S	<=	1	S	<=	2	S	neg	neg
20155452	1	0-4	SAMN05222397	50	98669	247893	2061366	23B	neg	9867	0	0	0	<=	0.03	S	S	<=	0.03	S	<=	0.06	S	<=	0.06	S	S	<=	0.5	S	S	<=	0.5	S	neg	=	0.06	S	=	0.06	S	<=	1	S	<=	2	S	neg	neg
20155453	63	19to64	SAMN05222398	54	96572	226175	2031476	3	neg	180	2	3	2	<=	0.03	S	S	<=	0.03	S	<=	0.06	S	<=	0.06	S	S	<=	0.5	S	S	<=	0.5	S	neg	=	0.06	S	=	0.06	S	<=	1	S	<=	2	S	neg	neg
20155454	54	19to64	SAMN05222399	78	48396	116466	2035836	35B	1	11254	4	7	7	=	2	R	S	=	4	I	=	0.5	I	=	1	I	S	=	1	I	S	>	2	R	neg	=	0.06	S	=	0.06	S	<=	1	S	<=	2	S	neg	FOLA-Q1Y,I20L:FOLP_169-ins
20155455	65	>65	SAMN05222400	55	95724	155611	2066600	10A	neg	2068	0	0	2	<=	0.03	S	S	<=	0.03	S	<=	0.06	S	<=	0.06	S	S	<=	0.5	S	S	<=	0.5	S	neg	=	0.06	S	=	0.06	S	<=	1	S	<=	2	S	neg	FOLP_180-ins
20155456	26	19to64	SAMN05222401	109	72139	182676	1990910	3	neg	180	2	3	2	<=	0.03	S	S	<=	0.03	S	<=	0.06	S	<=	0.06	S	S	<=	0.5	S	S	<=	0.5	S	neg	=	0.06	S	=	0.06	S	<=	1	S	<=	2	S	neg	neg
20155457	70	>65	SAMN05222402	63	64864	235259	2076171	22F	neg	433	1	2	2	<=	0.03	S	S	<=	0.03	S	<=	0.06	S	<=	0.06	S	S	<=	0.5	S	S	<=	0.5	S	neg	=	0.06	S	=	0.06	S	<=	1	S	<=	2	S	neg	neg
20155458	50	19to64	SAMN05222403	53	83856	257359	2053124	16F	neg	659	9	0	3	<=	0.03	S	S	<=	0.03	S	<=	0.06	S	<=	0.06	S	S	<=	0.5	S	S	<=	0.5	S	neg	=	0.06	S	=	0.06	S	<=	1	S	<=	2	S	neg	neg
20155459	28	19to64	SAMN05222404	113	32690	104660	2120587	15B	neg	199	2	0	2	<=	0.03	S	S	<=	0.03	S	<=	0.06	S	<=	0.06	S	S	<=	0.5	S	S	<=	0.5	S	MEF	=	8	R	=	0.06	S	<=	1	S	<=	2	S	neg	neg
20155460	40	19to64	SAMN05222405	57	88651	256875	2093681	9N	neg	632	1	0	0	<=	0.03	S	S	<=	0.03	S	<=	0.06	S	<=	0.06	S	S	<=	0.5	S	S	<=	0.5	S	neg	=	0.06	S	=	0.06	S	<=	1	S	<=	2	S	neg	neg
20155461	51	19to64	SAMN05222406	45	85090	188451	2029341	11A	neg	62	2	6	10	<=	0.03	S	S	<=	0.03	S	<=	0.06	S	<=	0.06	S	S	<=	0.5	S	S	<=	0.5	S	MEF	=	8	R	=	0.06	S	<=	1	S	<=	2	S	neg	neg
20155462	28	19to64	SAMN05222407	55	89044	271933	2156635	6A	neg	282	15	12	18	=	2	R	S	=	2	S	=	0.5	I	=	1	I	S	=	1	I	S	>	2	R	MEF	=	8	R	=	0.06	S	<=	1	S	<=	2	S	neg	FOLA-Q1H,Q11H,E14D,I20L
20155463	53	19to64	SAMN05222408	40	95853	339043	2079999	23A	neg	338	19	1	24	=	0.5	R	S	=	0.25	S	<=	0.06	S	=	0.25	S	S	<=	0.5	S	S	<=	0.5	S	ERMB	>	32	R	>	2	R	<=	1	S	<=	2	S	pos	neg
20155464	42	19to64	SAMN05222409	48	100152	432176	2167362	9N	neg	632	1	104	0	<=	0.03	S	S	<=	0.03	S	<=	0.06	S	<=	0.06	S	S	<=	0.5	S	S	<=	0.5	S	neg	=	0.06	S	=	0.06	S	<=	1	S	<=	2	S	neg	neg
20155465	55	19to64	SAMN05222410	63	81888	300844	2076235	22F	neg	433	1	2	2	<=	0.03	S	S	<=	0.03	S	<=	0.06	S	<=	0.06	S	S	<=	0.5	S	S	<=	0.5	S	neg	=	0.06	S	=	0.06	S	<=	1	S	<=	2	S	neg	neg
20155466	57	19to64	SAMN05222411	49	87008	261204	2067017	22F	neg	11557	1	2	2	<=	0.03	S	S	<=	0.03	S	<=	0.06	S	<=	0.06	S	S	<=	0.5	S	S	<=	0.5	S	neg	=	0.06	S	=	0.06	S	<=	1	S	<=	2	S	neg	neg
20155467	90	>65	SAMN05222412	78	52278	119259	2025652	31	neg	568	12	0	0	<=	0.03	S	S	<=	0.03	S	<=	0.06	S	<=	0.06	S	S	<=	0.5	S	S	<=	0.5	S	neg	=	0.06	S	=	0.06	S	<=	1	S	<=	2	S	neg	neg
20155468	47	19to64	SAMN05222413	64	68279	126282	1985775	12F	neg	220	0	0	17	<=	0.03	S	S	<=	0.03	S	<=	0.06	S	<=	0.06	S	S	<=	0.5	S	S	<=	0.5	S	neg	=	0.06	S	=	0.06	S	<=	1	S	<=	2	S	neg	neg
20155469	56	19to64	SAMN05222414	35	186248	364278	2030521	3	neg	180	2	3	2	<=	0.03	S	S	<=	0.03	S	<=	0.06	S	<=	0.06	S	S	<=	0.5	S	S	<=	0.5	S	neg	=	0.06	S	=	0.06	S	<=	1	S	<=	2	S	neg	neg
20155470	59	19to64	SAMN05222415	62	103662	199995	2073242	15B	neg	199	2	0	2	<=	0.03	S	S	<=	0.03	S	<=	0.06	S	<=	0.06	S	S	<=	0.5	S	S	<=	0.5	S	MEF	=	8	R	=	0.06	S	<=	1	S	<=	2	S	neg	neg
20155471	53	19to64	SAMN05222416	98	50697	193156	2101089	13	1	574	11	0	0	<=	0.03	S	S	<=	0.03	S	<=	0.06	S	<=	0.06	S	S	<=	0.5	S	S	<=	0.5	S	neg	=	0.06	S	=	0.06	S	<=	1	S	<=	2	S	neg	neg
20155472	27	19to64	SAMN05222417	70	64997	154815	2128900	6C	1	138	2	0	3	<=	0.03	S	S	<=	0.03	S	<=	0.06	S	<=	0.06	S	S	<=	0.5	S	S	<=	0.5	S	neg	=	0.06	S	=	0.06	S	<=	1	S	<=	2	S	neg	neg
20155473	3	0-4	SAMN05222418	89	55354	176716	2073549	19F	2	654	2	0	0	<=	0.03	S	S	<=	0.03	S	<=	0.06	S	<=	0.06	S	S	<=	0.5	S	S	<=	0.5	S	neg	=	0.06	S	=	0.06	S	<=	1	S	<=	2	S	neg	neg
20155474	56	19to64	SAMN05222419	79	55191	94962	2020525	31	neg	568	12	0	0	<=	0.03	S	S	<=	0.03	S	<=	0.06	S	<=	0.06	S	S	<=	0.5	S	S	<=	0.5	S	neg	=	0.06	S	=	0.06	S	<=	1	S	<=	2	S	neg	neg
20155475	68	>65	SAMN05222420	61	99388	228486	2057187	22F	neg	7314	1	2	2	<=	0.03	S	S	<=	0.03	S	<=	0.06	S	<=	0.06	S	S	<=	0.5	S	S	<=	0.5	S	MEF	=	8	R	=	0.06	S	<=	1	S	<=	2	S	neg	neg
20155476	74	>65	SAMN05222421	68	69203	254968	2115847	15A	neg	63	24	27	28	=	0.25	R	S	<=	0.03	S	<=	0.06	S	=	0.12	S	S	<=	0.5	S	S	<=	0.5	S	ERMB	>	32	R	>	2	R	<=	1	S	<=	2	S	pos	FOLP_178-ins
20155477	106	>65	SAMN05222422	61	99085	171247	2069699	10A	neg	97	0	0	2	<=	0.03	S	S	<=	0.03	S	<=	0.06	S	<=	0.06	S	S	<=	0.5	S	S	<=	0.5	S	MEF	=	8	R	=	0.06	S	<=	1	S	<=	2	S	neg	neg
20155478	86	>65	SAMN05222423	65	77253	189251	2098163	16F	neg	995	9	4	3	<=	0.03	S	S	<=	0.03	S	<=	0.06	S	<=	0.06	S	S	<=	0.5	S	S	<=	0.5	S	neg	=	0.06	S	=	0.06	S	<=	1	S	<=	2	S	neg	neg
20155479	45	19to64	SAMN05222424	80	119401	282231	2066674	19A	1:2	320	13	11	16	=	4	R	I	=	8	R	=	1	R	=	2	R	I	=	2	R	I	>	2	R	ERMB:MEF	>	32	R	>	2	R	<=	1	S	<=	2	S	pos	FOLA-Q1Y,Q11H,E14D,I20L:FOLP_195-ins
20155482	62	19to64	SAMN05222425	74	69234	197918	1988907	3	neg	10445	2	3	2	<=	0.03	S	S	<=	0.03	S	<=	0.06	S	<=	0.06	S	S	<=	0.5	S	S	<=	0.5	S	neg	=	0.06	S	=	0.06	S	<=	1	S	<=	2	S	neg	neg
20155483	83	>65	SAMN05222426	55	92984	253642	2011606	35B	1	558	4	7	7	=	2	R	S	=	4	I	=	0.5	I	=	1	I	S	=	1	I	S	>	2	R	MEF	=	8	R	=	0.06	S	<=	1	S	<=	2	S	neg	neg
20155484	12	5to18	SAMN05222427	213	66563	137247	2019955	4	neg	10172	3	0	0	<=	0.03	S	S	<=	0.03	S	<=	0.06	S	<=	0.06	S	S	<=	0.5	S	S	<=	0.5	S	neg	=	0.06	S	=	0.06	S	<=	1	S	<=	2	S	neg	FOLA-I20L:FOLP_178-ins
20155485	67	>65	SAMN05222428	188	44210	157824	2057424	22F	neg	433	1	2	2	<=	0.03	S	S	<=	0.03	S	<=	0.06	S	<=	0.06	S	S	<=	0.5	S	S	<=	0.5	S	neg	=	0.06	S	=	0.06	S	<=	1	S	<=	2	S	neg	neg
20155486	78	>65	SAMN05222429	41	178515	278455	2062307	16F	neg	659	9	0	3	<=	0.03	S	S	<=	0.03	S	<=	0.06	S	<=	0.06	S	S	<=	0.5	S	S	<=	0.5	S	neg	=	0.06	S	=	0.06	S	<=	1	S	<=	2	S	neg	neg
20155487	4	0-4	SAMN05222430	87	74607	303930	2080771	7C	neg	1797	2	4	6	<=	0.03	S	S	<=	0.03	S	<=	0.06	S	<=	0.06	S	S	<=	0.5	S	S	<=	0.5	S	neg	=	0.06	S	=	0.06	S	<=	1	S	<=	2	S	neg	neg
20155488	47	19to64	SAMN05222431	72	98473	288507	2151036	23B	neg	439	0	0	0	<=	0.03	S	S	<=	0.03	S	<=	0.06	S	<=	0.06	S	S	<=	0.5	S	S	<=	0.5	S	MEF	=	8	R	=	0.06	S	<=	1	S	<=	2	S	neg	neg
20155489	64	19to64	SAMN05222432	56	114186	317382	2075581	15A	neg	63	24	27	13	=	0.25	R	S	=	0.25	S	<=	0.06	S	=	0.25	S	S	<=	0.5	S	S	<=	0.5	S	ERMB	>	32	R	>	2	R	<=	1	S	<=	2	S	pos	FOLP_180-ins
20155490	68	>65	SAMN05222433	66	139271	308312	1993732	3	neg	180	2	3	2	<=	0.03	S	S	<=	0.03	S	<=	0.06	S	<=	0.06	S	S	<=	0.5	S	S	<=	0.5	S	neg	=	0.06	S	=	0.06	S	<=	1	S	<=	2	S	neg	neg
20155491	52	19to64	SAMN05222434	42	124873	294590	2075158	23B	neg	439	0	0	0	<=	0.03	S	S	<=	0.03	S	<=	0.06	S	<=	0.06	S	S	<=	0.5	S	S	<=	0.5	S	neg	=	0.06	S	=	0.06	S	<=	1	S	<=	2	S	neg	neg
20155492	60	19to64	SAMN05222435	54	94364	274024	2023397	11A	2	62	2	6	0	<=	0.03	S	S	<=	0.03	S	<=	0.06	S	<=	0.06	S	S	<=	0.5	S	S	<=	0.5	S	MEF	=	8	R	=	0.06	S	<=	1	S	<=	2	S	neg	neg
20155493	35	19to64	SAMN05222436	51	129551	288664	2108539	23B	neg	439	0	0	0	<=	0.03	S	S	<=	0.03	S	<=	0.06	S	<=	0.06	S	S	<=	0.5	S	S	<=	0.5	S	neg	=	0.06	S	=	0.06	S	<=	1	S	<=	2	S	neg	neg
20155494	80	>65	SAMN05222437	64	58403	240115	2076907	22F	neg	433	1	2	2	<=	0.03	S	S	<=	0.03	S	<=	0.06	S	<=	0.06	S	S	<=	0.5	S	S	<=	0.5	S	neg	=	0.06	S	=	0.06	S	<=	1	S	<=	2	S	neg	neg
20155495	49	19to64	SAMN05222438	74	75050	191066	2089962	11A	neg	62	2	6	NF	<=	0.03	S	S	<=	0.03	S	<=	0.06	S	<=	0.06	S	S	<=	0.03	S	S	<=	0.5	S	neg	=	0.06	S	=	0.06	S	<=	1	S	<=	2	S	neg	neg
20155496	2	0-4	SAMN05222439	89	55679	195400	2149465	23B	neg	11587	0	1	1	=	0.25	R	S	=	0.06	S	<=	0.06	S	=	0.12	S	S	<=	0.5	S	S	<=	0.5	S	neg	=	0.06	S	=	0.06	S	<=	1	S	<=	2	S	neg	FOLP_180-ins
20155497	54	19to64	SAMN05222440	59	77448	223389	2071470	22F	neg	433	1	2	2	<=	0.03	S	S	<=	0.03	S	<=	0.06	S	<=	0.06	S	S	<=	0.5	S	S	<=	0.5	S	neg	=	0.06	S	=	0.06	S	<=	1	S	<=	2	S	neg	neg
20155498	62	19to64	SAMN05222441	65	67297	235621	2069158	35F	neg	498	0	0	3	<=	0.03	S	S	<=	0.03	S	<=	0.06	S	<=	0.06	S	S	<=	0.5	S	S	<=	0.5	S	neg	=	0.06	S	=	0.06	S	<=	1	S	<=	2	S	neg	neg
20155499	0	0-4	SAMN05222442	74	59926	193425	2095473	15A	1	3811	1	0	0	<=	0.03	S	S	<=	0.03	S	<=	0.06	S	<=	0.06	S	S	<=	0.5	S	S	<=	0.5	S	neg	=	0.06	S	=	0.06	S	<=	1	S	<=	2	S	neg	neg
20155500	80	>65	SAMN05222443	37	165698	297459	1977346	3	neg	180	2	0	2	<=	0.03	S	S	<=	0.03	S	<=	0.06	S	<=	0.06	S	S	<=	0.5	S	S	<=	0.5	S	neg	=	0.06	S	=	0.06	S	<=	1	S	<=	2	S	neg	neg
20155501	67	>65	SAMN05222444	60	70816	243188	2022494	11A	2	62	2	6	0	<=	0.03	S	S	<=	0.03	S	<=	0.06	S	<=	0.06	S	S	<=	0.5	S	S	<=	0.5	S	neg	=	0.06	S	=	0.06	S	<=	1	S	<=	2	S	neg	neg
20155502	66	>65	SAMN05222445	52	122612	341313	2114426	23B	neg	439	0	0	0	<=	0.03	S	S	<=	0.03	S	<=	0.06	S	<=	0.06	S	S	<=	0.5	S	S	<=	0.5	S	MEF	=	8	R	=	0.06	S	<=	1	S	<=	2	S	neg	neg
20155503	22	19to64	SAMN05222446	72	60545	162681	2078464	22F	neg	433	1	2	2	<=	0.03	S	S	<=	0.03	S	<=	0.06	S	<=	0.06	S	S	<=	0.5	S	S	<=	0.5	S	neg	=	0.06	S	=	0.06	S	<=	1	S	<=	2	S	neg	neg
20155504	47	19to64	SAMN05222447	108	49676	90784	2125551	19A	1	695	8	0	11	=	0.12	R	S	=	0.06	S	<=	0.06	S	<=	0.06	S	S	<=	0.5	S	S	<=	0.5	S	MEF	=	8	R	=	0.06	S	<=	1	S	<=	2	S	neg	neg
20155505	34	19to64	SAMN05222448	65	109547	298410	2057339	22F	neg	10226	1	2	2	<=	0.03	S	S	<=	0.03	S	<=	0.06	S	<=	0.06	S	S	<=	0.5	S	S	<=	0.5	S	MEF	=	8	R	=	0.06	S	<=	1	S	<=	2	S	neg	neg
20155506	51	19to64	SAMN05222449	73	60187	185866	2105421	19F	2	654	2	0	0	<=	0.03	S	S	<=	0.03	S	<=	0.06	S	<=	0.06	S	S	<=	0.5	S	S	<=	0.5	S	neg	=	0.06	S	=	0.06	S	<=	1	S	<=	2	S	neg	neg
20155507	43	19to64	SAMN05222450	88	48965	182793	2109522	19F	2	654	2	0	0	<=	0.03	S	S	<=	0.03	S	<=	0.06	S	<=	0.06	S	S	<=	0.5	S	S	<=	0.5	S	neg	=	0.06	S	=	0.06	S	<=	1	S	<=	2	S	neg	neg
20155508	54	19to64	SAMN05222451	29	157295	485936	2097499	23A	neg	338	0	1	1	=	0.25	R	S	=	0.06	S	<=	0.06	S	=	0.12	S	S	<=	0.5	S	S	<=	0.5	S	neg	=	0.06	S	=	0.06	S	<=	1	S	<=	2	S	neg	neg
20155509	52	19to64	SAMN05222452	101	48624	116458	2045699	31	neg	1111	12	0	0	<=	0.03	S	S	<=	0.03	S	<=	0.06	S	<=	0.06	S	S	<=	0.5	S	S	<=	0.5	S	MEF	=	8	R	=	0.06	S	<=	1	S	<=	2	S	neg	neg
20155510	29	19to64	SAMN05222453	42	108152	221695	2014639	35B	1	558	4	7	7	=	2	R	S	=	4	I	=	0.5	I	=	1	I	S	=	1	I	S	>	2	R	neg	=	0.06	S	=	0.06	S	<=	1	S	<=	2	S	neg	FOLP_189-ins
20155511	42	19to64	SAMN05222454	59	89844	220577	2019518	35B	1	558	4	7	7	=	2	R	S	=	4	I	=	0.5	I	=	1	I	S	=	1	I	S	>	2	R	MEF	=	8	R	=	0.06	S	<=	1	S	<=	2	S	neg	neg
20155512	57	19to64	SAMN05222455	71	81622	161614	2158657	6C	1	138	2	0	3	<=	0.03	S	S	<=	0.03	S	<=	0.06	S	<=	0.06	S	S	<=	0.5	S	S	<=	0.5	S	neg	=	0.06	S	=	0.06	S	<=	1	S	<=	2	S	neg	neg
20155513	93	>65	SAMN05222456	52	79779	256622	1984836	33F	neg	1012	2	0	2	<=	0.03	S	S	<=	0.03	S	<=	0.06	S	<=	0.06	S	S	<=	0.5	S	S	<=	0.5	S	neg	=	0.06	S	=	0.06	S	<=	1	S	<=	2	S	neg	neg
20155515	30	19to64	SAMN05222458	88	63544	203146	2125549	7C	neg	1797	2	4	6	<=	0.03	S	S	<=	0.03	S	<=	0.06	S	<=	0.06	S	S	<=	0.5	S	S	<=	0.5	S	neg	=	0.06	S	=	0.06	S	<=	1	S	<=	2	S	neg	neg
20155516	35	19to64	SAMN05222459	75	64243	182432	2120547	34	neg	11268	0	0	2	<=	0.03	S	S	<=	0.03	S	<=	0.06	S	<=	0.06	S	S	<=	0.5	S	S	<=	0.5	S	neg	=	0.06	S	=	0.06	S	<=	1	S	<=	2	S	neg	neg
20155517	80	>65	SAMN05222460	67	63467	231001	2120152	34	neg	11579	0	0	2	<=	0.03	S	S	<=	0.03	S	<=	0.06	S	<=	0.06	S	S	<=	0.5	S	S	<=	0.5	S	neg	=	0.06	S	=	0.06	S	<=	1	S	<=	2	S	neg	neg
20155518	79	>65	SAMN05222461	72	80743	213474	2089970	9N	neg	1257	1	4	2	<=	0.03	S	S	<=	0.03	S	<=	0.06	S	<=	0.06	S	S	<=	0.5	S	S	<=	0.5	S	neg	=	0.06	S	=	0.06	S	<=	1	S	<=	2	S	neg	neg
20155519	76	>65	SAMN05222462	50	114486	305153	2113485	23A	neg	338	19	1	24	=	0.5	R	S	=	0.25	S	<=	0.06	S	=	0.25	S	S	<=	0.5	S	S	<=	0.5	S	ERMB	>	32	R	>	2	R	<=	1	S	<=	2	S	pos	neg
20155520	53	19to64	SAMN05222463	49	114737	334503	2055483	16F	neg	995	9	4	3	<=	0.03	S	S	<=	0.03	S	<=	0.06	S	<=	0.06	S	S	<=	0.5	S	S	<=	0.5	S	neg	=	0.06	S	=	0.06	S	<=	1	S	<=	2	S	neg	neg
20155521	69	>65	SAMN05222464	63	115782	273906	2061948	16F	neg	659	9	0	3	<=	0.03	S	S	<=	0.03	S	<=	0.06	S	<=	0.06	S	S	<=	0.5	S	S	<=	0.5	S	neg	=	0.06	S	=	0.06	S	<=	1	S	<=	2	S	neg	neg
20155522	49	19to64	SAMN05222465	49	128668	274254	2074507	17F	neg	1924	11	0	172	<=	0.03	S	S	<=	0.03	S	<=	0.06	S	<=	0.06	S	S	<=	0.5	S	S	<=	0.5	S	neg	=	0.06	S	=	0.06	S	<=	1	S	<=	2	S	neg	neg
20155523	84	>65	SAMN05222466	37	155076	346878	2064280	15A	neg	11571	24	27	28	=	0.25	R	S	<=	0.03	S	<=	0.06	S	=	0.12	S	S	<=	0.5	S	S	<=	0.5	S	ERMB	>	32	R	>	2	R	<=	1	S	<=	2	S	pos	neg
20155524	45	19to64	SAMN05222467	50	115579	266285	2104092	23A	neg	361	0	1	1	=	0.25	R	S	=	0.06	S	<=	0.06	S	=	0.12	S	S	<=	0.5	S	S	<=	0.5	S	neg	=	0.06	S	=	0.06	S	<=	1	S	<=	2	S	neg	neg
20155525	45	19to64	SAMN05222468	229	38800	87317	2072896	9N	neg	1257	1	4	2	<=	0.03	S	S	<=	0.03	S	<=	0.06	S	<=	0.06	S	S	<=	0.5	S	S	<=	0.5	S	neg	=	0.06	S	=	0.06	S	<=	1	S	<=	2	S	neg	neg
20155526	79	>65	SAMN05222469	64	99123	257811	2010771	28A	neg	11601	2	2	69	=	0.06	S	S	<=	0.03	S	<=	0.06	S	<=	0.06	S	S	<=	0.5	S	S	<=	0.5	S	neg	=	0.06	S	=	0.06	S	<=	1	S	<=	2	S	neg	neg
20155527	86	>65	SAMN05222470	60	108022	296652	2091596	16F	neg	995	9	4	3	<=	0.03	S	S	<=	0.03	S	<=	0.06	S	<=	0.06	S	S	<=	0.5	S	S	<=	0.5	S	neg	=	0.06	S	=	0.06	S	<=	1	S	<=	2	S	neg	neg
20155528	43	19to64	SAMN05222471	83	72839	208464	2080152	10A	neg	816	0	0	2	<=	0.03	S	S	<=	0.03	S	<=	0.06	S	<=	0.06	S	S	<=	0.5	S	S	<=	0.5	S	neg	=	0.06	S	=	0.06	S	<=	1	S	<=	2	S	neg	neg
20155529	84	>65	SAMN05222472	71	103491	339364	2071469	33F	neg	2705	2	0	6	<=	0.03	S	S	<=	0.03	S	<=	0.06	S	<=	0.06	S	S	<=	0.5	S	S	<=	0.5	S	MEF	=	8	R	=	0.06	S	<=	1	S	<=	2	S	neg	FOLP_189-ins
20155530	57	19to64	SAMN05222473	88	52032	108537	2057285	35B	1	558	4	7	7	=	2	R	S	=	4	I	=	0.5	I	=	1	I	S	=	1	I	S	>	2	R	neg	=	0.06	S	=	0.06	S	<=	1	S	<=	2	S	neg	neg
20155531	83	>65	SAMN05222474	42	131938	389020	2063969	23A	neg	338	0	1	1	=	0.25	R	S	=	0.06	S	<=	0.06	S	=	0.12	S	S	<=	0.5	S	S	<=	0.5	S	MEF	=	8	R	=	0.06	S	<=	1	S	<=	2	S	neg	neg
20155532	57	19to64	SAMN05222475	33	177266	285203	2142982	23B	neg	1373	0	1	1	=	0.25	R	S	=	0.06	S	<=	0.06	S	=	0.12	S	S	<=	0.5	S	S	<=	0.5	S	neg	=	0.06	S	=	0.06	S	<=	1	S	<=	2	S	neg	FOLP_180-ins
20155533	80	>65	SAMN05222476	70	68821	183182	2117416	19A	neg	1936	0	16	11	=	0.12	R	S	=	0.12	S	=	0.12	S	<=	0.06	S	S	<=	0.5	S	S	<=	0.5	S	MEF	=	8	R	=	0.06	S	<=	1	S	<=	2	S	neg	FOLA-Q1H,I20L:FOLP_180-ins
20155534	34	19to64	SAMN05222477	27	180834	511368	2057040	33F	neg	100	2	0	6	<=	0.03	S	S	<=	0.03	S	<=	0.06	S	<=	0.06	S	S	<=	0.5	S	S	<=	0.5	S	MEF	=	8	R	=	0.06	S	<=	1	S	<=	2	S	neg	FOLP_189-ins
20155535	83	>65	SAMN05222478	92	111930	288398	2109223	6C	neg	1379	2	0	3	<=	0.03	S	S	<=	0.03	S	<=	0.06	S	<=	0.06	S	S	<=	0.5	S	S	<=	0.5	S	neg	=	0.06	S	=	0.06	S	<=	1	S	<=	2	S	neg	neg
20155536	52	19to64	SAMN05222479	257	36899	101128	2061499	6C	neg	1379	19	31	8	=	1	R	S	=	1	S	=	0.12	S	=	0.25	S	S	<=	0.5	S	S	=	2	R	MEF	=	8	R	=	0.06	S	<=	1	S	<=	2	S	neg	FOLA-Q1H,I20L:FOLP_173-ins
20155537	85	>65	SAMN05222480	40	106045	221770	2015548	35B	1	558	4	7	7	=	2	R	S	=	4	I	=	0.5	I	=	1	I	S	=	1	I	S	>	2	R	MEF	=	8	R	=	0.06	S	<=	1	S	<=	2	S	neg	neg
20155538	63	19to64	SAMN05222481	59	77884	261508	2074577	22F	neg	11557	1	2	2	<=	0.03	S	S	<=	0.03	S	<=	0.06	S	<=	0.06	S	S	<=	0.5	S	S	<=	0.5	S	neg	=	0.06	S	=	0.06	S	<=	1	S	<=	2	S	neg	neg
20155539	66	>65	SAMN05222482	81	55445	184006	2024485	31	neg	568	12	0	0	<=	0.03	S	S	<=	0.03	S	<=	0.06	S	<=	0.06	S	S	<=	0.5	S	S	<=	0.5	S	neg	=	0.06	S	=	0.06	S	<=	1	S	<=	2	S	neg	neg
20155540	37	19to64	SAMN05222483	63	80559	226451	2067154	22F	neg	433	1	2	2	<=	0.03	S	S	<=	0.03	S	<=	0.06	S	<=	0.06	S	S	<=	0.5	S	S	<=	0.5	S	neg	=	0.06	S	=	0.06	S	<=	1	S	<=	2	S	neg	neg
20155541	67	>65	SAMN05222484	45	117428	380813	2053151	16F	neg	995	9	4	3	<=	0.03	S	S	<=	0.03	S	<=	0.06	S	<=	0.06	S	S	<=	0.5	S	S	<=	0.5	S	neg	=	0.06	S	=	0.06	S	<=	1	S	<=	2	S	neg	neg
20155543	61	19to64	SAMN05222485	52	121448	378464	2042054	19A	1:2	320	13	11	16	=	4	R	I	=	8	R	=	1	R	=	2	R	I	=	2	R	I	>	2	R	ERMB:MEF	>	32	R	>	2	R	<=	1	S	<=	2	S	pos	FOLA-Q1Y,Q11H,E14D,I20L:FOLP_195-ins
20155544	49	19to64	SAMN05222486	55	114557	234982	2088304	16F	neg	3157	0	0	3	<=	0.03	S	S	<=	0.03	S	<=	0.06	S	<=	0.06	S	S	<=	0.5	S	S	<=	0.5	S	neg	=	0.06	S	=	0.06	S	<=	1	S	<=	2	S	neg	neg
20155545	61	19to64	SAMN05222487	69	91186	217005	2042810	3	neg	180	2	0	111	=	0.06	S	S	=	0.06	S	<=	0.06	S	=	0.25	S	S	<=	0.5	S	S	=	1	I	ERMB	>	32	R	>	2	R	<=	1	S	<=	2	S	pos	neg
20155546	72	>65	SAMN05222488	75	71320	164980	2128725	7C	neg	1797	2	4	6	<=	0.03	S	S	<=	0.03	S	<=	0.06	S	<=	0.06	S	S	<=	0.5	S	S	<=	0.5	S	neg	=	0.06	S	=	0.06	S	<=	1	S	<=	2	S	neg	neg
20155547	71	>65	SAMN05222489	46	95751	309654	2065195	23A	neg	338	0	1	1	=	0.25	R	S	=	0.06	S	<=	0.06	S	=	0.12	S	S	<=	0.5	S	S	<=	0.5	S	neg	=	0.06	S	=	0.06	S	<=	1	S	<=	2	S	neg	neg
20155548	77	>65	SAMN05222490	69	67326	175003	2009521	7F	2	191	2	0	2	<=	0.03	S	S	<=	0.03	S	<=	0.06	S	<=	0.06	S	S	<=	0.5	S	S	<=	0.5	S	neg	=	0.06	S	=	0.06	S	<=	1	S	<=	2	S	neg	neg
20155549	22	19to64	SAMN05222491	55	107470	230694	2186837	34	neg	547	0	0	2	<=	0.03	S	S	<=	0.03	S	<=	0.06	S	<=	0.06	S	S	<=	0.5	S	S	<=	0.5	S	neg	=	0.06	S	=	0.06	S	<=	1	S	<=	2	S	neg	neg
20155550	53	19to64	SAMN05222492	55	101931	306037	2090788	20	neg	235	1	4	12	<=	0.03	S	S	<=	0.03	S	<=	0.06	S	=	0.12	S	S	<=	0.5	S	S	<=	0.5	S	neg	=	0.06	S	=	0.06	S	<=	1	S	<=	2	S	neg	neg
20155551	54	19to64	SAMN05222493	66	58533	188592	2073758	22F	neg	433	1	2	2	<=	0.03	S	S	<=	0.03	S	<=	0.06	S	<=	0.06	S	S	<=	0.5	S	S	<=	0.5	S	neg	=	0.06	S	=	0.06	S	<=	1	S	<=	2	S	neg	neg
20155552	48	19to64	SAMN05222494	79	72484	305339	2096517	23A	neg	338	0	1	1	=	0.25	R	S	=	0.06	S	<=	0.06	S	=	0.12	S	S	<=	0.5	S	S	<=	0.5	S	neg	=	0.06	S	=	0.06	S	<=	1	S	<=	2	S	neg	neg
20155553	53	19to64	SAMN05222495	55	98773	298498	2056472	22F	neg	7314	1	2	2	<=	0.03	S	S	<=	0.03	S	<=	0.06	S	<=	0.06	S	S	<=	0.5	S	S	<=	0.5	S	MEF	=	8	R	=	0.06	S	<=	1	S	<=	2	S	neg	neg
20155554	81	>65	SAMN05222496	52	142687	308471	1978408	3	neg	180	2	3	2	<=	0.03	S	S	<=	0.03	S	<=	0.06	S	<=	0.06	S	S	<=	0.5	S	S	<=	0.5	S	neg	=	0.06	S	=	0.06	S	<=	1	S	<=	2	S	neg	neg
20155555	60	19to64	SAMN05222497	50	75173	180353	2044728	11A	2	62	2	6	0	<=	0.03	S	S	<=	0.03	S	<=	0.06	S	<=	0.06	S	S	<=	0.5	S	S	<=	0.5	S	neg	=	0.06	S	=	0.06	S	<=	1	S	<=	2	S	neg	neg
20155556	70	>65	SAMN05222498	45	155935	423774	2056228	20	neg	235	1	4	2	<=	0.03	S	S	<=	0.03	S	<=	0.06	S	<=	0.06	S	S	<=	0.5	S	S	<=	0.5	S	neg	=	0.06	S	=	0.06	S	<=	1	S	<=	2	S	neg	neg
20155557	85	>65	SAMN05222499	56	96958	332328	2097349	20	neg	1257	1	4	2	<=	0.03	S	S	<=	0.03	S	<=	0.06	S	<=	0.06	S	S	<=	0.5	S	S	<=	0.5	S	neg	=	0.06	S	=	0.06	S	<=	1	S	<=	2	S	neg	neg
20155558	0	0-4	SAMN05222500	58	103604	318276	2096999	20	neg	235	1	4	2	<=	0.03	S	S	<=	0.03	S	<=	0.06	S	<=	0.06	S	S	<=	0.5	S	S	<=	0.5	S	neg	=	0.06	S	=	0.06	S	<=	1	S	<=	2	S	neg	neg
20155559	50	19to64	SAMN05222501	30	156128	303977	2076647	6C	neg	1876	36	34	44	=	0.5	R	S	=	0.25	S	<=	0.06	S	=	0.25	S	S	<=	0.5	S	S	=	1	I	MEF	=	8	R	=	0.06	S	<=	1	S	<=	2	S	neg	neg
20155560	0	0-4	SAMN05222502	42	119508	207440	1980063	12F	neg	220	0	0	2	<=	0.03	S	S	<=	0.03	S	<=	0.06	S	<=	0.06	S	S	<=	0.5	S	S	<=	0.5	S	neg	=	0.06	S	=	0.06	S	<=	1	S	<=	2	S	neg	neg
20155561	56	19to64	SAMN05222503	35	128434	207318	1978466	12F	neg	220	0	0	2	<=	0.03	S	S	<=	0.03	S	<=	0.06	S	<=	0.06	S	S	<=	0.5	S	S	<=	0.5	S	neg	=	0.06	S	=	0.06	S	<=	1	S	<=	2	S	neg	neg
20155562	62	19to64	SAMN05222504	47	111281	255657	2046138	13	1	156	15	12	173	=	0.25	R	S	=	0.5	S	=	0.25	S	=	0.5	S	S	=	1	I	S	=	2	R	neg	=	0.06	S	=	0.06	S	<=	1	S	<=	2	S	neg	FOLA-I20L:FOLP_178-ins
20155563	57	19to64	SAMN05222505	42	108761	317080	2055488	22F	neg	7314	1	2	2	<=	0.03	S	S	<=	0.03	S	<=	0.06	S	<=	0.06	S	S	<=	0.5	S	S	<=	0.5	S	MEF	=	8	R	=	0.06	S	<=	1	S	<=	2	S	neg	FOLA-Q1H,I20L
20155564	55	19to64	SAMN05222506	55	157527	267900	2140859	23B	neg	1373	0	1	1	=	0.25	R	S	=	0.06	S	<=	0.06	S	=	0.12	S	S	<=	0.5	S	S	<=	0.5	S	neg	=	0.06	S	=	0.06	S	<=	1	S	<=	2	S	neg	FOLP_180-ins
20155565	49	19to64	SAMN05222507	56	115018	231070	2114282	23B	neg	1373	0	1	1	=	0.25	R	S	=	0.06	S	<=	0.06	S	=	0.12	S	S	<=	0.5	S	S	<=	0.5	S	neg	=	0.06	S	=	0.06	S	<=	1	S	<=	2	S	neg	FOLP_180-ins
20155568	73	>65	SAMN05222510	51	132377	476892	2104864	15B	1	3280	7	8	9	=	0.25	R	S	=	0.5	S	=	0.12	S	=	0.12	S	S	<=	0.5	S	S	<=	0.5	S	MEF	=	8	R	=	0.06	S	<=	1	S	<=	2	S	neg	FOLP_177-ins:FOLP_180-ins
20155569	53	19to64	SAMN05222511	51	160934	283223	2076005	15A	neg	63	24	27	13	=	0.25	R	S	=	0.25	S	<=	0.06	S	=	0.25	S	S	<=	0.5	S	S	<=	0.5	S	ERMB	>	32	R	>	2	R	<=	1	S	<=	2	S	pos	FOLP_180-ins
20155570	57	19to64	SAMN05222512	54	96766	218883	2057745	11A	2	62	2	6	44	=	0.06	S	S	<=	0.03	S	<=	0.06	S	=	0.12	S	S	<=	0.5	S	S	<=	0.5	S	MEF	=	8	R	=	0.06	S	<=	1	S	<=	2	S	neg	neg
20155571	57	19to64	SAMN05222513	448	36013	89762	2025682	33F	neg	2705	2	0	6	<=	0.03	S	S	<=	0.03	S	<=	0.06	S	<=	0.06	S	S	<=	0.5	S	S	<=	0.5	S	MEF	=	8	R	=	0.06	S	<=	1	S	<=	2	S	neg	FOLP_189-ins
20155572	4	0-4	SAMN05222514	44	134467	315907	2110111	15C	1	7479	7	8	9	=	0.25	R	S	=	0.5	S	=	0.12	S	=	0.12	S	S	<=	0.5	S	S	<=	0.5	S	MEF	=	8	R	=	0.06	S	<=	1	S	<=	2	S	neg	FOLP_177-ins:FOLP_180-ins
20155573	82	>65	SAMN05222515	66	93047	231172	2094324	6C	neg	1692	2	6	0	<=	0.03	S	S	<=	0.03	S	<=	0.06	S	<=	0.06	S	S	<=	0.5	S	S	<=	0.5	S	neg	=	0.06	S	=	0.06	S	<=	1	S	<=	2	S	neg	neg
20155574	81	>65	SAMN05222516	42	110459	187886	2051374	9N	neg	66	1	0	0	<=	0.03	S	S	<=	0.03	S	<=	0.06	S	<=	0.06	S	S	<=	0.5	S	S	<=	0.5	S	neg	=	0.06	S	=	0.06	S	<=	1	S	<=	2	S	neg	neg
20155901	36	19to64	SAMN05222517	38	120311	276544	2014089	35B	1	558	4	7	7	=	2	R	S	=	4	I	=	0.5	I	=	1	I	S	=	1	I	S	>	2	R	MEF	=	8	R	=	0.06	S	<=	1	S	<=	2	S	neg	neg
20155902	57	19to64	SAMN05222518	46	107836	394317	2067258	10A	neg	97	0	0	2	<=	0.03	S	S	<=	0.03	S	<=	0.06	S	<=	0.06	S	S	<=	0.5	S	S	<=	0.5	S	MEF	=	8	R	=	0.06	S	<=	1	S	<=	2	S	neg	neg
20155903	57	19to64	SAMN05222519	47	216602	567170	2045278	3	neg	180	2	0	2	<=	0.03	S	S	<=	0.03	S	<=	0.06	S	<=	0.06	S	S	<=	0.5	S	S	<=	0.5	S	ERMB:ERMBS:ERMBUP	=	0.06	S	=	0.06	S	<=	1	S	<=	2	S	neg	neg
20155904	57	19to64	SAMN05222520	64	110904	162184	2109915	15C	neg	199	2	0	0	<=	0.03	S	S	<=	0.03	S	<=	0.06	S	<=	0.06	S	S	<=	0.5	S	S	<=	0.5	S	neg	=	0.06	S	=	0.06	S	<=	1	S	<=	2	S	neg	neg
20155905	48	19to64	SAMN05222521	37	178070	265298	2131420	23B	neg	1373	0	1	1	=	0.25	R	S	=	0.06	S	<=	0.06	S	=	0.12	S	S	<=	0.5	S	S	<=	0.5	S	MEF	=	8	R	=	0.06	S	<=	1	S	<=	2	S	neg	FOLP_180-ins
20155906	73	>65	SAMN05222522	37	159741	433873	2103921	34	neg	11268	0	0	2	<=	0.03	S	S	<=	0.03	S	<=	0.06	S	<=	0.06	S	S	<=	0.5	S	S	<=	0.5	S	neg	=	0.06	S	=	0.06	S	<=	1	S	<=	2	S	neg	neg
20155907	64	19to64	SAMN05222523	50	101403	220362	2069135	22F	neg	433	1	2	2	<=	0.03	S	S	<=	0.03	S	<=	0.06	S	<=	0.06	S	S	<=	0.5	S	S	<=	0.5	S	neg	=	0.06	S	=	0.06	S	<=	1	S	<=	2	S	neg	neg
20155908	49	19to64	SAMN05222524	52	125041	307669	2103809	23A	neg	338	0	1	1	=	0.25	R	S	=	0.06	S	<=	0.06	S	=	0.12	S	S	<=	0.5	S	S	<=	0.5	S	neg	=	0.06	S	=	0.06	S	<=	1	S	<=	2	S	neg	FOLA-I20L
20155909	73	>65	SAMN05222525	37	128192	413934	2095452	15B	1	3280	7	8	9	=	0.25	R	S	=	0.5	S	=	0.12	S	=	0.12	S	S	<=	0.5	S	S	<=	0.5	S	ERMB:ERMBUP	>	32	R	>	2	R	<=	1	S	<=	2	S	pos	FOLP_177-ins:FOLP_180-ins
20155910	58	19to64	SAMN05222526	51	97785	190868	2067314	22F	neg	433	1	2	2	<=	0.03	S	S	<=	0.03	S	<=	0.06	S	<=	0.06	S	S	<=	0.5	S	S	<=	0.5	S	neg	=	0.06	S	=	0.06	S	<=	1	S	<=	2	S	neg	neg
20155913	86	>65	SAMN05222527	56	82631	291224	2084829	17F	neg	392	11	0	0	<=	0.03	S	S	<=	0.03	S	<=	0.06	S	<=	0.06	S	S	<=	0.5	S	S	<=	0.5	S	neg	=	0.06	S	=	0.06	S	<=	1	S	<=	2	S	neg	neg
20155915	53	19to64	SAMN09224128	65	106548	358188	1996240	8	neg	1480	3	5	5	<=	0.03	S	S	<=	0.03	S	<=	0.06	S	<=	0.06	S	S	<=	0.5	S	S	<=	0.5	S	neg	=	0.06	S	=	0.06	S	<=	1	S	<=	2	S	neg	neg
20155917	72	>65	SAMN09224009	62	98042	257954	2137095	9N	neg	66	1	0	0	<=	0.03	S	S	<=	0.03	S	<=	0.06	S	<=	0.06	S	S	<=	0.5	S	S	<=	0.5	S	neg	=	0.06	S	=	0.06	S	<=	1	S	<=	2	S	neg	neg
20155918	58	19to64	SAMN09223971	61	110467	267314	2155469	9N	neg	66	1	0	0	<=	0.03	S	S	<=	0.03	S	<=	0.06	S	<=	0.06	S	S	<=	0.5	S	S	<=	0.5	S	ERMB:MEF	>	32	R	>	2	R	<=	1	S	<=	2	S	pos	neg
20155919	55	19to64	SAMN09230514	16	379062	444014	2020230	33F	neg	9029	2	0	6	<=	0.03	S	S	<=	0.03	S	<=	0.06	S	<=	0.06	S	S	<=	0.5	S	S	<=	0.5	S	MEF	=	8	R	=	0.06	S	<=	1	S	<=	2	S	neg	FOLP_189-ins
20155920	88	>65	SAMN09230999	46	77896	262003	2063283	22F	neg	11559	1	2	2	<=	0.03	S	S	<=	0.03	S	<=	0.06	S	<=	0.06	S	S	<=	0.5	S	S	<=	0.5	S	neg	=	0.06	S	=	0.06	S	<=	1	S	<=	2	S	neg	neg
20155921	74	>65	SAMN09224467	75	104007	189887	2123745	7C	neg	1797	2	4	6	<=	0.03	S	S	<=	0.03	S	<=	0.06	S	<=	0.06	S	S	<=	0.5	S	S	<=	0.5	S	neg	=	0.06	S	=	0.06	S	<=	1	S	<=	2	S	neg	neg
20155922	72	>65	SAMN05596826	34	110264	381521	2000725	35B	1	558	4	7	7	=	2	R	S	=	4	I	=	0.5	I	=	1	I	S	=	1	I	S	>	2	R	MEF	=	8	R	=	0.06	S	<=	1	S	<=	2	S	neg	neg
20155923	68	>65	SAMN09231041	47	110157	298405	2053675	22F	neg	10163	1	2	2	<=	0.03	S	S	<=	0.03	S	<=	0.06	S	<=	0.06	S	S	<=	0.5	S	S	<=	0.5	S	MEF	=	8	R	=	0.06	S	<=	1	S	<=	2	S	neg	neg
20155924	65	>65	SAMN09231233	52	108449	298409	2055286	22F	neg	10163	1	2	2	<=	0.03	S	S	<=	0.03	S	<=	0.06	S	<=	0.06	S	S	<=	0.5	S	S	<=	0.5	S	MEF	=	8	R	=	0.06	S	<=	1	S	<=	2	S	neg	neg
20155925	60	19to64	SAMN09231071	48	95909	262993	2072402	10A	neg	816	0	0	2	<=	0.03	S	S	<=	0.03	S	<=	0.06	S	<=	0.06	S	S	<=	0.5	S	S	<=	0.5	S	MEF	=	8	R	=	0.06	S	<=	1	S	<=	2	S	neg	neg
20155926	63	19to64	SAMN05596827	49	113003	279011	2127968	35B	1	156	4	12	7	=	2	R	S	=	4	I	=	0.5	I	=	1	I	S	=	1	I	S	>	2	R	MEF	=	8	R	=	0.06	S	<=	1	S	<=	2	S	neg	FOLA-I20L:FOLP_178-ins
20155927	76	>65	SAMN09224375	72	85355	164775	2088771	7C	neg	1797	2	4	6	<=	0.03	S	S	<=	0.03	S	<=	0.06	S	<=	0.06	S	S	<=	0.5	S	S	<=	0.5	S	neg	=	0.06	S	=	0.06	S	<=	1	S	<=	2	S	neg	neg
20155928	64	19to64	SAMN09230553	25	186667	489707	2067503	33F	neg	2705	2	0	6	<=	0.03	S	S	<=	0.03	S	<=	0.06	S	<=	0.06	S	S	<=	0.5	S	S	<=	0.5	S	MEF	=	8	R	=	0.06	S	<=	1	S	<=	2	S	neg	FOLP_189-ins
20155929	26	19to64	SAMN09224511	76	100371	383407	2087199	9N	neg	11594	23	0	0	<=	0.03	S	S	<=	0.03	S	<=	0.06	S	<=	0.06	S	S	<=	0.5	S	S	<=	0.5	S	neg	=	0.06	S	=	0.06	S	<=	1	S	<=	2	S	neg	neg
20155930	78	>65	SAMN09231417	56	87004	261166	2072769	22F	neg	433	1	2	2	<=	0.03	S	S	<=	0.03	S	<=	0.06	S	<=	0.06	S	S	<=	0.5	S	S	<=	0.5	S	neg	=	0.06	S	=	0.06	S	<=	1	S	<=	2	S	neg	neg
20155931	47	19to64	SAMN09231487	58	101770	155181	2085269	6C	neg	639	2	0	0	<=	0.03	S	S	<=	0.03	S	<=	0.06	S	<=	0.06	S	S	<=	0.5	S	S	<=	0.5	S	MEF	=	8	R	=	0.06	S	<=	1	S	<=	2	S	neg	neg
20155932	0	0-4	SAMN09230584	28	220616	489685	2103438	33F	neg	2705	2	0	6	<=	0.03	S	S	<=	0.03	S	<=	0.06	S	<=	0.06	S	S	<=	0.5	S	S	<=	0.5	S	MEF	=	8	R	=	0.06	S	<=	1	S	<=	2	S	neg	FOLP_189-ins
20155933	91	>65	SAMN09231363	55	134768	341786	2115865	14	neg	5912	17	46	35	=	0.5	R	S	=	0.25	S	=	0.25	S	=	0.25	S	S	<=	0.5	S	S	<=	0.5	S	neg	=	0.06	S	=	0.06	S	<=	1	S	<=	2	S	neg	FOLA-D12G,E14D,I20L:FOLP_180-ins
20155934	69	>65	SAMN09230835	41	161928	342819	2059208	16F	neg	11561	9	4	3	<=	0.03	S	S	<=	0.03	S	<=	0.06	S	<=	0.06	S	S	<=	0.5	S	S	<=	0.5	S	neg	=	0.06	S	=	0.06	S	<=	1	S	<=	2	S	neg	neg
20155935	88	>65	SAMN09230782	39	200102	234094	2118119	34	neg	547	0	0	2	<=	0.03	S	S	<=	0.03	S	<=	0.06	S	<=	0.06	S	S	<=	0.5	S	S	<=	0.5	S	neg	=	0.06	S	=	0.06	S	<=	1	S	<=	2	S	neg	neg
20155936	80	>65	SAMN09231364	55	118891	187918	1983914	12F	neg	220	0	0	2	<=	0.03	S	S	<=	0.03	S	<=	0.06	S	<=	0.06	S	S	<=	0.5	S	S	<=	0.5	S	neg	=	0.06	S	=	0.06	S	<=	1	S	<=	2	S	neg	neg
20155937	88	>65	SAMN09230783	39	152456	187934	1980374	12F	neg	220	0	0	2	<=	0.03	S	S	<=	0.03	S	<=	0.06	S	<=	0.06	S	S	<=	0.5	S	S	<=	0.5	S	neg	=	0.06	S	=	0.06	S	<=	1	S	<=	2	S	neg	neg
20155938	25	19to64	SAMN09230535	23	173057	637009	2066023	33F	neg	2705	2	0	6	<=	0.03	S	S	<=	0.03	S	<=	0.06	S	<=	0.06	S	S	<=	0.5	S	S	<=	0.5	S	MEF	=	8	R	=	0.06	S	<=	1	S	<=	2	S	neg	FOLP_189-ins
20155939	94	>65	SAMN09230756	38	120994	296783	2103771	23A	neg	338	0	1	1	=	0.25	R	S	=	0.06	S	<=	0.06	S	=	0.12	S	S	<=	0.5	S	S	<=	0.5	S	MEF	=	8	R	=	0.06	S	<=	1	S	<=	2	S	neg	neg
20155940	45	19to64	SAMN09224081	64	69525	182977	2007416	7F	2	191	2	0	2	<=	0.03	S	S	<=	0.03	S	<=	0.06	S	<=	0.06	S	S	<=	0.5	S	S	<=	0.5	S	neg	=	0.06	S	=	0.06	S	<=	1	S	<=	2	S	neg	neg
20155941	72	>65	SAMN09218548	93	49797	182107	2065642	11A	2	62	2	6	0	<=	0.03	S	S	<=	0.03	S	<=	0.06	S	<=	0.06	S	S	<=	0.5	S	S	<=	0.5	S	neg	=	0.06	S	=	0.06	S	<=	1	S	<=	2	S	neg	neg
20155942	26	19to64	SAMN09218549	93	50150	202859	2133599	38	neg	393	2	4	0	<=	0.03	S	S	<=	0.03	S	<=	0.06	S	<=	0.06	S	S	<=	0.5	S	S	<=	0.5	S	neg	=	0.06	S	=	0.06	S	<=	1	S	<=	2	S	neg	neg
20155943	70	>65	SAMN09231365	55	83953	172797	2075148	22F	neg	433	1	2	2	<=	0.03	S	S	<=	0.03	S	<=	0.06	S	<=	0.06	S	S	<=	0.5	S	S	<=	0.5	S	neg	=	0.06	S	=	0.06	S	<=	1	S	<=	2	S	neg	neg
20155944	89	>65	SAMN09231418	56	62879	263675	2104162	23A	neg	338	0	1	1	=	0.25	R	S	=	0.06	S	<=	0.06	S	=	0.12	S	S	<=	0.5	S	S	<=	0.5	S	neg	=	0.06	S	=	0.06	S	<=	1	S	<=	2	S	neg	FOLA-I20L
20155946	61	19to64	SAMN09230861	42	159824	420371	2022084	3	neg	180	2	3	2	<=	0.03	S	S	<=	0.03	S	<=	0.06	S	<=	0.06	S	S	<=	0.5	S	S	<=	0.5	S	neg	=	0.06	S	=	0.06	S	<=	1	S	<=	2	S	neg	neg
20155948	54	19to64	SAMN09231282	53	69307	212044	2055673	22F	neg	10163	1	2	2	<=	0.03	S	S	<=	0.03	S	<=	0.06	S	<=	0.06	S	S	<=	0.5	S	S	<=	0.5	S	MEF	=	8	R	=	0.06	S	<=	1	S	<=	2	S	neg	neg
20155949	65	>65	SAMN09231488	58	103828	279823	2051184	9N	neg	4666	23	0	0	<=	0.03	S	S	<=	0.03	S	<=	0.06	S	<=	0.06	S	S	<=	0.5	S	S	<=	0.5	S	neg	=	0.06	S	=	0.06	S	<=	1	S	<=	2	S	neg	neg
20155950	71	>65	SAMN09230757	38	104199	210686	2013184	3	neg	180	2	3	2	<=	0.03	S	S	<=	0.03	S	<=	0.06	S	<=	0.06	S	S	<=	0.5	S	S	<=	0.5	S	neg	=	0.06	S	=	0.06	S	<=	1	S	<=	2	S	neg	neg
20155951	70	>65	SAMN05596828	50	81991	204198	2008203	35B	1	7486	4	7	7	=	2	R	S	=	4	I	=	0.5	I	=	1	I	S	=	1	I	S	>	2	R	MEF	=	8	R	=	0.06	S	<=	1	S	<=	2	S	neg	neg
20155952	57	19to64	SAMN09224043	63	64710	200693	2105994	23A	neg	338	0	1	1	=	0.25	R	S	=	0.06	S	<=	0.06	S	=	0.12	S	S	<=	0.5	S	S	<=	0.5	S	neg	=	0.06	S	=	0.06	S	<=	1	S	<=	2	S	neg	FOLA-I20L
20155953	56	19to64	SAMN09224409	73	53046	261209	2074102	22F	neg	433	1	2	2	<=	0.03	S	S	<=	0.03	S	<=	0.06	S	<=	0.06	S	S	<=	0.5	S	S	<=	0.5	S	neg	=	0.06	S	=	0.06	S	<=	1	S	<=	2	S	neg	neg
20155954	64	19to64	SAMN09230784	39	167558	385713	2022809	3	neg	11588	2	3	2	<=	0.03	S	S	<=	0.03	S	<=	0.06	S	<=	0.06	S	S	<=	0.5	S	S	<=	0.5	S	neg	=	0.06	S	=	0.06	S	<=	1	S	<=	2	S	neg	neg
20155955	44	19to64	SAMN09223972	61	98318	274839	1996682	8	neg	1480	3	5	5	<=	0.03	S	S	<=	0.03	S	<=	0.06	S	<=	0.06	S	S	<=	0.5	S	S	<=	0.5	S	neg	=	0.06	S	=	0.06	S	<=	1	S	<=	2	S	neg	neg
20155956	53	19to64	SAMN09224166	66	66414	142084	1984039	12F	neg	220	0	0	2	<=	0.03	S	S	<=	0.03	S	<=	0.06	S	<=	0.06	S	S	<=	0.5	S	S	<=	0.5	S	neg	=	0.06	S	=	0.06	S	<=	1	S	<=	2	S	neg	neg
20155957	55	19to64	SAMN09224410	73	59643	134998	2057941	22F	neg	10163	1	2	2	<=	0.03	S	S	<=	0.03	S	<=	0.06	S	<=	0.06	S	S	<=	0.5	S	S	<=	0.5	S	MEF	=	8	R	=	0.06	S	<=	1	S	<=	2	S	neg	neg
20155958	56	19to64	SAMN09218736	104	40281	77104	2102524	9N	neg	66	1	0	0	<=	0.03	S	S	<=	0.03	S	<=	0.06	S	<=	0.06	S	S	<=	0.5	S	S	<=	0.5	S	neg	=	0.06	S	=	0.06	S	<=	1	S	<=	2	S	neg	neg
20155959	82	>65	SAMN09218442	88	46034	119317	2089736	17F	neg	392	11	0	0	<=	0.03	S	S	<=	0.03	S	<=	0.06	S	<=	0.06	S	S	<=	0.5	S	S	<=	0.5	S	neg	=	0.06	S	=	0.06	S	<=	1	S	<=	2	S	neg	neg
20155960	82	>65	SAMN09231194	51	82893	197269	2070766	16F	neg	1840	0	10	2	<=	0.03	S	S	<=	0.03	S	<=	0.06	S	<=	0.06	S	S	<=	0.5	S	S	<=	0.5	S	neg	=	0.06	S	=	0.06	S	<=	1	S	<=	2	S	neg	neg
20155961	61	19to64	SAMN09230675	34	195942	415171	2024914	3	neg	180	2	3	2	<=	0.03	S	S	<=	0.03	S	<=	0.06	S	<=	0.06	S	S	<=	0.5	S	S	<=	0.5	S	neg	=	0.06	S	=	0.06	S	<=	1	S	<=	2	S	neg	neg
20155962	40	19to64	SAMN09224468	75	95232	324670	1991809	8	neg	1268	3	5	5	<=	0.03	S	S	<=	0.03	S	<=	0.06	S	<=	0.06	S	S	<=	0.5	S	S	<=	0.5	S	neg	=	0.06	S	=	0.06	S	<=	1	S	<=	2	S	neg	neg
20155963	23	19to64	SAMN09218752	105	59215	151013	2044199	8	neg	404	3	2	5	<=	0.03	S	S	<=	0.03	S	<=	0.06	S	<=	0.06	S	S	<=	0.5	S	S	<=	0.5	S	neg	=	0.06	S	=	0.06	S	<=	1	S	<=	2	S	neg	neg
20155964	51	19to64	SAMN09224376	72	87831	260511	2118418	15A	neg	63	24	27	28	=	0.25	R	S	<=	0.03	S	<=	0.06	S	=	0.12	S	S	<=	0.5	S	S	<=	0.5	S	ERMB	>	32	R	>	2	R	<=	1	S	<=	2	S	pos	FOLP_178-ins
20155965	58	19to64	SAMN09223924	60	78041	186133	2097468	9N	neg	66	1	0	0	<=	0.03	S	S	<=	0.03	S	<=	0.06	S	<=	0.06	S	S	<=	0.5	S	S	<=	0.5	S	neg	=	0.06	S	=	0.06	S	<=	1	S	<=	2	S	neg	neg
20155966	48	19to64	SAMN09218550	93	64809	136161	1991769	3	neg	180	2	3	2	<=	0.03	S	S	<=	0.03	S	<=	0.06	S	<=	0.06	S	S	<=	0.5	S	S	<=	0.5	S	neg	=	0.06	S	=	0.06	S	<=	1	S	<=	2	S	neg	neg
20155967	6	5to18	SAMN09224578	78	59345	158126	2057032	22F	neg	10163	1	2	2	<=	0.03	S	S	<=	0.03	S	<=	0.06	S	<=	0.06	S	S	<=	0.5	S	S	<=	0.5	S	MEF	=	8	R	=	0.06	S	<=	1	S	<=	2	S	neg	neg
20155968	45	19to64	SAMN09223925	60	78806	312363	2059383	19A	1:2	320	13	11	16	=	4	R	I	=	8	R	=	1	R	=	2	R	I	=	2	R	I	>	2	R	ERMB:MEF	>	32	R	>	2	R	<=	1	S	<=	2	S	pos	FOLA-Q1Y,Q11H,E14D,I20L:FOLP_195-ins
20155969	53	19to64	SAMN09231458	57	113952	317507	2066752	15A	neg	63	24	27	28	=	0.25	R	S	<=	0.03	S	<=	0.06	S	=	0.12	S	S	<=	0.5	S	S	<=	0.5	S	ERMB	>	32	R	>	2	R	<=	1	S	<=	2	S	pos	neg
20155970	55	19to64	SAMN09224297	70	82808	226233	2076324	10A	neg	816	0	0	2	<=	0.03	S	S	<=	0.03	S	<=	0.06	S	<=	0.06	S	S	<=	0.5	S	S	<=	0.5	S	MEF	=	8	R	=	0.06	S	<=	1	S	<=	2	S	neg	neg
20155971	76	>65	SAMN09224044	63	98745	273885	2067214	22F	neg	13482	1	2	2	<=	0.03	S	S	<=	0.03	S	<=	0.06	S	<=	0.06	S	S	<=	0.5	S	S	<=	0.5	S	neg	=	0.06	S	=	0.06	S	<=	1	S	<=	2	S	neg	neg
20155972	58	19to64	SAMN09224512	76	54296	132708	2109819	19F	2	654	2	0	0	<=	0.03	S	S	<=	0.03	S	<=	0.06	S	<=	0.06	S	S	<=	0.5	S	S	<=	0.5	S	neg	=	0.06	S	=	0.06	S	<=	1	S	<=	2	S	neg	neg
20155973	74	>65	SAMN09230785	39	153617	296701	2064075	23A	neg	338	0	1	1	=	0.25	R	S	=	0.06	S	<=	0.06	S	=	0.12	S	S	<=	0.5	S	S	<=	0.5	S	neg	=	0.06	S	=	0.06	S	<=	1	S	<=	2	S	neg	FOLA-I20L
20155974	53	19to64	SAMN09224469	75	82208	197756	1992616	3	neg	180	2	3	2	<=	0.03	S	S	<=	0.03	S	<=	0.06	S	<=	0.06	S	S	<=	0.5	S	S	<=	0.5	S	neg	=	0.06	S	=	0.06	S	<=	1	S	<=	2	S	neg	neg
20155975	52	19to64	SAMN09230566	26	163678	481960	2066264	33F	neg	2705	2	0	6	<=	0.03	S	S	<=	0.03	S	<=	0.06	S	<=	0.06	S	S	<=	0.5	S	S	<=	0.5	S	MEF	=	8	R	=	0.06	S	<=	1	S	<=	2	S	neg	FOLP_189-ins
20155976	86	>65	SAMN09214265	450	46268	130770	2101558	3	neg	180	2	3	2	<=	0.03	S	S	<=	0.03	S	<=	0.06	S	<=	0.06	S	S	<=	0.5	S	S	<=	0.5	S	neg	=	0.06	S	=	0.06	S	<=	1	S	<=	2	S	neg	neg
20155977	100	>65	SAMN09223926	60	69368	222898	2068894	22F	neg	433	1	2	2	<=	0.03	S	S	<=	0.03	S	<=	0.06	S	<=	0.06	S	S	<=	0.5	S	S	<=	0.5	S	neg	=	0.06	S	=	0.06	S	<=	1	S	<=	2	S	neg	neg
20155978	87	>65	SAMN09224716	82	64557	155325	2084941	6C	neg	639	2	0	0	<=	0.03	S	S	<=	0.03	S	<=	0.06	S	<=	0.06	S	S	<=	0.5	S	S	<=	0.5	S	MEF	=	8	R	=	0.06	S	<=	1	S	<=	2	S	neg	neg
20155979	0	0-4	SAMN09231489	58	105514	214459	2141773	21	neg	432	0	0	1	=	0.12	R	S	=	0.06	S	<=	0.06	S	=	0.12	S	S	<=	0.5	S	S	<=	0.5	S	neg	=	0.06	S	=	0.06	S	<=	1	S	<=	2	S	neg	neg
20155980	87	>65	SAMN09218674	100	42434	117576	2129710	17F	neg	392	11	0	0	<=	0.03	S	S	<=	0.03	S	<=	0.06	S	<=	0.06	S	S	<=	0.5	S	S	<=	0.5	S	neg	=	0.06	S	=	0.06	S	<=	1	S	<=	2	S	neg	neg
20155981	64	19to64	SAMN09230862	42	141029	323491	1988028	3	neg	180	2	3	2	<=	0.03	S	S	<=	0.03	S	<=	0.06	S	<=	0.06	S	S	<=	0.5	S	S	<=	0.5	S	neg	=	0.06	S	=	0.06	S	<=	1	S	<=	2	S	neg	neg
20155982	44	19to64	SAMN09231234	52	87018	248066	2055892	22F	neg	10163	1	2	2	<=	0.03	S	S	<=	0.03	S	<=	0.06	S	<=	0.06	S	S	<=	0.5	S	S	<=	0.5	S	MEF	=	8	R	=	0.06	S	<=	1	S	<=	2	S	neg	neg
20155983	27	19to64	SAMN09230676	34	102714	218749	2033855	18F	neg	11562	12	0	0	<=	0.03	S	S	<=	0.03	S	<=	0.06	S	<=	0.06	S	S	<=	0.5	S	S	<=	0.5	S	neg	=	0.06	S	=	0.06	S	<=	1	S	<=	2	S	neg	neg
20155984	62	19to64	SAMN09230593	29	340896	673277	1994985	8	neg	1480	3	5	5	<=	0.03	S	S	<=	0.03	S	<=	0.06	S	<=	0.06	S	S	<=	0.5	S	S	<=	0.5	S	neg	=	0.06	S	=	0.06	S	<=	1	S	<=	2	S	neg	neg
20155985	0	0-4	SAMN09230528	22	278652	604650	2034948	3	neg	10457	2	0	6	<=	0.03	S	S	<=	0.03	S	<=	0.06	S	<=	0.06	S	S	<=	0.5	S	S	<=	0.5	S	neg	=	0.06	S	=	0.06	S	<=	1	S	<=	2	S	neg	FOLP_189-ins
20155986	88	>65	SAMN09224614	79	69090	168305	2128477	7C	neg	1797	2	4	6	<=	0.03	S	S	<=	0.03	S	<=	0.06	S	<=	0.06	S	S	<=	0.5	S	S	<=	0.5	S	neg	=	0.06	S	=	0.06	S	<=	1	S	<=	2	S	neg	neg
20155987	49	19to64	SAMN09231153	50	85119	257738	2035740	11A	2	62	2	6	0	<=	0.03	S	S	<=	0.03	S	<=	0.06	S	<=	0.06	S	S	<=	0.5	S	S	<=	0.5	S	neg	=	0.06	S	=	0.06	S	<=	1	S	<=	2	S	neg	neg
20155988	53	19to64	SAMN09219112	136	56602	133952	1993121	7F	2	191	2	0	2	<=	0.03	S	S	<=	0.03	S	<=	0.06	S	<=	0.06	S	S	<=	0.5	S	S	<=	0.5	S	neg	=	0.06	S	=	0.06	S	<=	1	S	<=	2	S	neg	neg
20155989	88	>65	SAMN09230594	29	208668	310901	1977276	3	neg	180	2	0	2	<=	0.03	S	S	<=	0.03	S	<=	0.06	S	<=	0.06	S	S	<=	0.5	S	S	<=	0.5	S	neg	=	0.06	S	=	0.06	S	<=	1	S	<=	2	S	neg	neg
20155990	85	>65	SAMN09224129	65	61438	203394	2113396	23A	neg	338	0	1	1	=	0.25	R	S	=	0.06	S	<=	0.06	S	=	0.12	S	S	<=	0.5	S	S	<=	0.5	S	neg	=	0.06	S	=	0.06	S	<=	1	S	<=	2	S	neg	FOLA-I20L
20155991	56	19to64	SAMN09231490	58	112816	315451	2096221	19A	1:2	1451	13	11	16	=	4	R	I	=	8	R	=	1	R	=	2	R	I	=	2	R	I	>	2	R	ERMB:MEF	>	32	R	>	2	R	<=	1	S	<=	2	S	pos	FOLA-Q1Y,Q11H,E14D,I20L:FOLP_195-ins
20155992	ND	ND	SAMN05222528	124	36425	165318	2188141	38	neg	393	77	4	0	<=	0.03	S	S	<=	0.03	S	<=	0.06	S	<=	0.06	S	S	<=	0.5	S	S	<=	0.5	S	neg	=	0.06	S	=	0.06	S	<=	1	S	<=	2	S	neg	neg
20155993	66	>65	SAMN05222529	42	94816	175021	1981886	12F	neg	220	0	0	2	<=	0.03	S	S	<=	0.03	S	<=	0.06	S	<=	0.06	S	S	<=	0.5	S	S	<=	0.5	S	neg	=	0.06	S	=	0.06	S	<=	1	S	<=	2	S	neg	neg
20155994	37	19to64	SAMN05222530	32	195535	266314	1993828	8	neg	1480	3	5	5	<=	0.03	S	S	<=	0.03	S	<=	0.06	S	<=	0.06	S	S	<=	0.5	S	S	<=	0.5	S	neg	=	0.06	S	=	0.06	S	<=	1	S	<=	2	S	neg	neg
20155995	73	>65	SAMN05222531	34	168256	217072	1976583	3	neg	180	2	0	2	<=	0.03	S	S	<=	0.03	S	<=	0.06	S	<=	0.06	S	S	<=	0.5	S	S	<=	0.5	S	neg	=	0.06	S	=	0.06	S	<=	1	S	<=	2	S	neg	neg
20155996	82	>65	SAMN05222532	67	86037	167299	2106595	22F	neg	433	1	2	2	<=	0.03	S	S	<=	0.03	S	<=	0.06	S	<=	0.06	S	S	<=	0.5	S	S	<=	0.5	S	neg	=	0.06	S	=	0.06	S	<=	1	S	<=	2	S	neg	neg
20155997	61	19to64	SAMN05222533	46	92935	187007	1982817	12F	neg	220	0	0	2	<=	0.03	S	S	<=	0.03	S	<=	0.06	S	<=	0.06	S	S	<=	0.5	S	S	<=	0.5	S	neg	=	0.06	S	=	0.06	S	<=	1	S	<=	2	S	neg	neg
20155998	38	19to64	SAMN05222534	26	198592	392339	1975324	3	neg	180	2	0	2	<=	0.03	S	S	<=	0.03	S	<=	0.06	S	<=	0.06	S	S	<=	0.5	S	S	<=	0.5	S	neg	=	0.06	S	=	0.06	S	<=	1	S	<=	2	S	neg	neg
20155999	59	19to64	SAMN05222535	51	91162	223201	2055131	22F	neg	7314	1	2	2	<=	0.03	S	S	<=	0.03	S	<=	0.06	S	<=	0.06	S	S	<=	0.5	S	S	<=	0.5	S	MEF	=	8	R	=	0.06	S	<=	1	S	<=	2	S	neg	neg
20156000	68	>65	SAMN05222536	41	125335	241277	2010817	3	neg	180	2	3	2	<=	0.03	S	S	<=	0.03	S	<=	0.06	S	<=	0.06	S	S	<=	0.5	S	S	<=	0.5	S	neg	=	0.06	S	=	0.06	S	<=	1	S	<=	2	S	neg	neg
20156001	72	>65	SAMN05222537	48	108614	298459	2054640	22F	neg	7314	1	2	2	<=	0.03	S	S	<=	0.03	S	<=	0.06	S	<=	0.06	S	S	<=	0.5	S	S	<=	0.5	S	MEF	=	8	R	=	0.06	S	<=	1	S	<=	2	S	neg	neg
20156002	79	>65	SAMN05222538	100	54312	129991	1976128	3	neg	180	2	0	2	<=	0.03	S	S	<=	0.03	S	<=	0.06	S	<=	0.06	S	S	<=	0.5	S	S	<=	0.5	S	neg	=	0.06	S	=	0.06	S	<=	1	S	<=	2	S	neg	neg
20156004	79	>65	SAMN05222540	37	152359	392976	1990532	8	neg	1480	3	2	5	<=	0.03	S	S	<=	0.03	S	<=	0.06	S	<=	0.06	S	S	<=	0.5	S	S	<=	0.5	S	neg	=	0.06	S	=	0.06	S	<=	1	S	<=	2	S	neg	neg
20156005	53	19to64	SAMN05222541	45	103750	286863	2046656	9N	neg	66	1	0	0	<=	0.03	S	S	<=	0.03	S	<=	0.06	S	<=	0.06	S	S	<=	0.5	S	S	<=	0.5	S	neg	=	0.06	S	=	0.06	S	<=	1	S	<=	2	S	neg	neg
20156006	84	>65	SAMN05222542	62	64279	268085	2046417	19A	1:2	320	13	11	16	=	4	R	I	=	8	R	=	1	R	=	2	R	I	=	2	R	I	>	2	R	ERMB:MEF	>	32	R	>	2	R	<=	1	S	<=	2	S	pos	FOLA-Q1Y,Q11H,E14D,I20L:FOLP_195-ins
20156007	51	19to64	SAMN05222543	139	30917	83101	2134940	6C	neg	473	1	4	21	=	0.06	S	S	<=	0.03	S	<=	0.06	S	<=	0.06	S	S	<=	0.5	S	S	<=	0.5	S	neg	=	0.06	S	=	0.06	S	<=	1	S	<=	2	S	neg	neg
20156008	58	19to64	SAMN05222544	109	44910	123370	1997708	8	neg	1480	3	5	5	<=	0.03	S	S	<=	0.03	S	<=	0.06	S	<=	0.06	S	S	<=	0.5	S	S	<=	0.5	S	neg	=	0.06	S	=	0.06	S	<=	1	S	<=	2	S	neg	neg
20156067	40	19to64	SAMN05222545	40	122619	230753	2008365	11A	neg	62	2	6	10	<=	0.03	S	S	<=	0.03	S	<=	0.06	S	<=	0.06	S	S	<=	0.5	S	S	<=	0.5	S	neg	=	0.06	S	=	0.06	S	<=	1	S	<=	2	S	neg	neg
20156068	ND	ND	SAMN05222546	48	98014	279768	2043937	11A	2	62	2	6	0	<=	0.03	S	S	<=	0.03	S	<=	0.06	S	<=	0.06	S	S	<=	0.5	S	S	<=	0.5	S	neg	=	0.06	S	=	0.06	S	<=	1	S	<=	2	S	neg	neg
20156069	47	19to64	SAMN05222547	59	80613	189857	2089659	16F	neg	3157	0	0	3	<=	0.03	S	S	<=	0.03	S	<=	0.06	S	<=	0.06	S	S	<=	0.5	S	S	<=	0.5	S	neg	=	0.06	S	=	0.06	S	<=	1	S	<=	2	S	neg	neg
20156070	38	19to64	SAMN05222548	63	63727	212748	2086098	17F	neg	392	11	0	0	<=	0.03	S	S	<=	0.03	S	<=	0.06	S	<=	0.06	S	S	<=	0.5	S	S	<=	0.5	S	neg	=	0.06	S	=	0.06	S	<=	1	S	<=	2	S	neg	neg
20156071	78	>65	SAMN05222549	71	84028	167295	2068634	22F	neg	433	1	2	27	<=	0.03	S	S	<=	0.03	S	<=	0.06	S	<=	0.06	S	S	<=	0.5	S	S	<=	0.5	S	neg	=	0.06	S	=	0.06	S	<=	1	S	<=	2	S	neg	neg
20156072	49	19to64	SAMN05222550	70	71993	182417	2092511	20	neg	235	1	4	2	<=	0.03	S	S	<=	0.03	S	<=	0.06	S	<=	0.06	S	S	<=	0.5	S	S	<=	0.5	S	neg	=	0.06	S	=	0.06	S	<=	1	S	<=	2	S	neg	neg
20156073	64	19to64	SAMN05222551	70	58124	237813	2157475	34	1	1092	6	101	8	=	0.5	R	S	=	1	S	=	0.25	S	=	0.5	S	S	<=	0.5	S	S	=	2	R	neg	=	0.06	S	=	0.06	S	<=	1	S	<=	2	S	neg	FOLA-Q1H,V3I,E14D,I20L:FOLP_195-ins
20156074	59	19to64	SAMN05222552	81	73714	165260	2075234	15A	neg	63	24	27	11	=	0.12	R	S	=	0.12	S	<=	0.06	S	<=	0.06	S	S	<=	0.5	S	S	<=	0.5	S	ERMB	>	32	R	>	2	R	<=	1	S	<=	2	S	pos	FOLP_178-ins
20156075	66	>65	SAMN05222553	46	167048	314072	2046736	3	neg	3798	2	0	111	=	0.06	S	S	=	0.06	S	<=	0.06	S	=	0.25	S	S	<=	0.5	S	S	=	1	I	ERMB	>	32	R	>	2	R	<=	1	S	<=	2	S	pos	neg
20156076	34	19to64	SAMN05222554	43	116066	677326	2054526	16F	neg	659	9	0	3	<=	0.03	S	S	<=	0.03	S	<=	0.06	S	<=	0.06	S	S	<=	0.5	S	S	<=	0.5	S	neg	=	0.06	S	=	0.06	S	<=	1	S	<=	2	S	neg	neg
20156077	0	0-4	SAMN05222555	59	73245	383246	2034771	9N	neg	405	23	0	0	<=	0.03	S	S	<=	0.03	S	<=	0.06	S	<=	0.06	S	S	<=	0.5	S	S	<=	0.5	S	neg	=	0.06	S	=	0.06	S	<=	1	S	<=	2	S	neg	neg
20156078	71	>65	SAMN05222556	54	82103	221405	2024595	35B	1	558	4	7	7	=	2	R	S	=	4	I	=	0.5	I	=	1	I	S	=	1	I	S	>	2	R	neg	=	0.06	S	=	0.06	S	<=	1	S	<=	2	S	neg	neg
20156079	63	19to64	SAMN05222557	39	130530	202739	2057756	20	neg	235	1	4	2	<=	0.03	S	S	<=	0.03	S	<=	0.06	S	<=	0.06	S	S	<=	0.5	S	S	<=	0.5	S	neg	=	0.06	S	=	0.06	S	<=	1	S	<=	2	S	neg	neg
20156080	87	>65	SAMN05222558	51	79644	186484	1983217	12F	neg	220	0	0	17	<=	0.03	S	S	<=	0.03	S	<=	0.06	S	<=	0.06	S	S	<=	0.5	S	S	<=	0.5	S	neg	=	0.06	S	=	0.06	S	<=	1	S	<=	2	S	neg	neg
20156081	79	>65	SAMN05222559	51	87014	296743	2057060	22F	neg	7314	1	2	2	<=	0.03	S	S	<=	0.03	S	<=	0.06	S	<=	0.06	S	S	<=	0.5	S	S	<=	0.5	S	MEF	=	8	R	=	0.06	S	<=	1	S	<=	2	S	neg	neg
20156082	87	>65	SAMN05222560	25	266861	357043	1974223	3	neg	180	2	0	2	<=	0.03	S	S	<=	0.03	S	<=	0.06	S	<=	0.06	S	S	<=	0.5	S	S	<=	0.5	S	neg	=	0.06	S	=	0.06	S	<=	1	S	<=	2	S	neg	neg
20156083	61	19to64	SAMN05222561	49	106360	198052	2117833	34	neg	547	0	0	2	<=	0.03	S	S	<=	0.03	S	<=	0.06	S	<=	0.06	S	S	<=	0.5	S	S	<=	0.5	S	neg	=	0.06	S	=	0.06	S	<=	1	S	<=	2	S	neg	neg
20156084	59	19to64	SAMN05222562	103	77027	164963	2167402	7C	neg	1797	2	4	6	<=	0.03	S	S	<=	0.03	S	<=	0.06	S	<=	0.06	S	S	<=	0.5	S	S	<=	0.5	S	neg	=	0.06	S	=	0.06	S	<=	1	S	<=	2	S	neg	neg
20156085	65	>65	SAMN05222563	82	64709	189708	2117503	15A	neg	9692	76	0	2	<=	0.03	S	S	<=	0.03	S	<=	0.06	S	<=	0.06	S	S	<=	0.5	S	S	<=	0.5	S	MEF	=	8	R	=	0.06	S	<=	1	S	<=	2	S	neg	neg
20156086	57	19to64	SAMN05222564	86	46793	99327	2084587	23A	neg	338	19	1	24	=	0.5	R	S	=	0.25	S	<=	0.06	S	=	0.25	S	S	<=	0.5	S	S	<=	0.5	S	ERMB	>	32	R	>	2	R	<=	1	S	<=	2	S	pos	neg
20156089	55	19to64	SAMN05222567	46	95174	347072	2078670	23A	neg	338	19	1	24	=	0.5	R	S	=	0.25	S	<=	0.06	S	=	0.25	S	S	<=	0.5	S	S	<=	0.5	S	ERMB	>	32	R	>	2	R	<=	1	S	<=	2	S	pos	neg
20156091	51	19to64	SAMN05222569	53	86620	191297	2108084	35F	neg	1368	74	0	77	=	0.06	S	S	=	0.06	S	<=	0.06	S	<=	0.06	S	S	<=	0.5	S	S	<=	0.5	S	MEF	=	8	R	=	0.06	S	<=	1	S	<=	2	S	neg	neg
20156092	56	19to64	SAMN05222570	66	69076	222221	2112919	22F	neg	433	1	2	59	<=	0.03	S	S	<=	0.03	S	<=	0.06	S	<=	0.06	S	S	<=	0.5	S	S	<=	0.5	S	MEF	=	8	R	=	0.06	S	<=	1	S	<=	2	S	neg	neg
20156093	79	>65	SAMN05222571	50	113594	317501	2077629	15A	neg	9431	24	27	13	=	0.25	R	S	=	0.25	S	<=	0.06	S	=	0.25	S	S	<=	0.5	S	S	<=	0.5	S	ERMB	>	32	R	>	2	R	<=	1	S	<=	2	S	pos	FOLP_180-ins
20156094	59	19to64	SAMN05222572	57	85890	206118	1981291	12F	neg	220	0	0	2	<=	0.03	S	S	<=	0.03	S	<=	0.06	S	<=	0.06	S	S	<=	0.5	S	S	<=	0.5	S	neg	=	0.06	S	=	0.06	S	<=	1	S	<=	2	S	neg	neg
20156095	85	>65	SAMN05222573	62	72009	139350	2082042	22F	neg	433	1	2	2	<=	0.03	S	S	<=	0.03	S	<=	0.06	S	<=	0.06	S	S	<=	0.5	S	S	<=	0.5	S	neg	=	0.06	S	=	0.06	S	<=	1	S	<=	2	S	neg	neg
20156096	53	19to64	SAMN05222574	448	24073	77206	2072644	19F	2	654	2	0	0	<=	0.03	S	S	<=	0.03	S	<=	0.06	S	<=	0.06	S	S	<=	0.5	S	S	<=	0.5	S	neg	=	0.06	S	=	0.06	S	<=	1	S	<=	2	S	neg	neg
20156097	71	>65	SAMN05222575	107	42398	157598	2160379	19F	2	251	2	0	0	<=	0.03	S	S	<=	0.03	S	<=	0.06	S	<=	0.06	S	S	<=	0.5	S	S	<=	0.5	S	neg	=	0.06	S	=	0.06	S	<=	1	S	<=	2	S	neg	neg
20156142	70	>65	SAMN05222576	46	129076	343614	2082480	6C	neg	11567	19	31	8	=	1	R	S	=	1	S	=	0.12	S	=	0.25	S	S	<=	0.5	S	S	=	2	R	MEF	=	8	R	=	0.06	S	<=	1	S	<=	2	S	neg	FOLA-Q1H,I20L:FOLP_173-ins
20156143	50	19to64	SAMN05222577	80	71539	265720	2063971	17F	neg	392	0	0	0	<=	0.03	S	S	<=	0.03	S	<=	0.06	S	<=	0.06	S	S	<=	0.5	S	S	<=	0.5	S	neg	=	0.06	S	=	0.06	S	<=	1	S	<=	2	S	neg	neg
20156144	63	19to64	SAMN05222578	83	64480	244406	2173566	15B	1	162	1	0	0	<=	0.03	S	S	<=	0.03	S	<=	0.06	S	<=	0.06	S	S	<=	0.5	S	S	<=	0.5	S	neg	=	0.06	S	=	0.06	S	<=	1	S	<=	2	S	neg	neg
20156145	95	>65	SAMN05222579	72	54356	140925	2114187	19F	2	654	2	0	0	<=	0.03	S	S	<=	0.03	S	<=	0.06	S	<=	0.06	S	S	<=	0.5	S	S	<=	0.5	S	neg	=	0.06	S	=	0.06	S	<=	1	S	<=	2	S	neg	neg
20156146	73	>65	SAMN05222580	60	96114	314775	2075729	15A	neg	63	24	27	143	=	0.5	R	S	=	0.25	S	=	0.12	S	=	0.5	S	S	=	1	I	S	=	2	R	ERMB	>	32	R	>	2	R	<=	1	S	<=	2	S	pos	neg
20156147	56	19to64	SAMN05222581	29	261923	499627	1976708	3	neg	180	2	0	2	<=	0.03	S	S	<=	0.03	S	<=	0.06	S	<=	0.06	S	S	<=	0.5	S	S	<=	0.5	S	neg	=	0.06	S	=	0.06	S	<=	1	S	<=	2	S	neg	neg
20156148	36	19to64	SAMN05222582	38	112698	418219	2038236	16F	neg	659	9	0	3	<=	0.03	S	S	<=	0.03	S	<=	0.06	S	<=	0.06	S	S	<=	0.5	S	S	<=	0.5	S	neg	=	0.06	S	=	0.06	S	<=	1	S	<=	2	S	neg	neg
20156149	68	>65	SAMN05222583	27	227283	618754	1988968	3	neg	180	2	3	2	<=	0.03	S	S	<=	0.03	S	<=	0.06	S	<=	0.06	S	S	<=	0.5	S	S	<=	0.5	S	neg	=	0.06	S	=	0.06	S	<=	1	S	<=	2	S	neg	neg
20156150	33	19to64	SAMN05222584	46	118500	293443	2096280	16F	neg	659	9	0	3	<=	0.03	S	S	<=	0.03	S	<=	0.06	S	<=	0.06	S	S	<=	0.5	S	S	<=	0.5	S	neg	=	0.06	S	=	0.06	S	<=	1	S	<=	2	S	neg	neg
20156151	28	19to64	SAMN05222585	85	65025	148194	2152975	19A	1	695	8	0	11	=	0.12	R	S	=	0.06	S	<=	0.06	S	<=	0.06	S	S	<=	0.5	S	S	<=	0.5	S	neg	=	0.06	S	=	0.06	S	<=	1	S	<=	2	S	neg	neg
20156152	21	19to64	SAMN05222586	48	102816	309708	2058987	16F	neg	659	9	0	3	<=	0.03	S	S	<=	0.03	S	<=	0.06	S	<=	0.06	S	S	<=	0.5	S	S	<=	0.5	S	neg	=	0.06	S	=	0.06	S	<=	1	S	<=	2	S	neg	neg
20156153	63	19to64	SAMN05222587	59	74938	261524	2074008	22F	neg	433	1	2	2	<=	0.03	S	S	<=	0.03	S	<=	0.06	S	<=	0.06	S	S	<=	0.5	S	S	<=	0.5	S	neg	=	0.06	S	=	0.06	S	<=	1	S	<=	2	S	neg	neg
20156286	83	>65	SAMN05222588	68	56299	148219	2075625	10A	neg	816	0	0	2	<=	0.03	S	S	<=	0.03	S	<=	0.06	S	<=	0.06	S	S	<=	0.5	S	S	<=	0.5	S	neg	=	0.06	S	=	0.06	S	<=	1	S	<=	2	S	neg	neg
20156287	48	19to64	SAMN05222589	70	56304	243875	2113844	22F	neg	433	1	2	2	<=	0.03	S	S	<=	0.03	S	<=	0.06	S	<=	0.06	S	S	<=	0.5	S	S	<=	0.5	S	neg	=	0.06	S	=	0.06	S	<=	1	S	<=	2	S	neg	neg
20156288	63	19to64	SAMN05222590	56	67106	261582	2068793	22F	neg	11559	1	2	2	<=	0.03	S	S	<=	0.03	S	<=	0.06	S	<=	0.06	S	S	<=	0.5	S	S	<=	0.5	S	neg	=	0.06	S	=	0.06	S	<=	1	S	<=	2	S	neg	neg
20156289	60	19to64	SAMN05222591	58	110285	267749	2127652	16F	neg	11581	90	35	169	=	0.12	R	S	=	0.12	S	<=	0.06	S	=	0.12	S	S	<=	0.5	S	S	<=	0.5	S	neg	=	0.06	S	=	0.06	S	<=	1	S	<=	2	S	neg	FOLA-Q1Y,E14D,I20L:FOLP_169-ins
20156290	59	19to64	SAMN05222592	64	67782	251190	2122520	15A	neg	63	67	27	35	=	0.5	R	S	=	0.25	S	=	0.12	S	=	0.25	S	S	<=	0.5	S	S	<=	0.5	S	ERMB	>	32	R	>	2	R	<=	1	S	<=	2	S	pos	FOLP_178-ins
20156291	69	>65	SAMN05222593	59	120408	260871	2044114	3	neg	180	2	0	168	=	0.06	S	S	=	0.06	S	<=	0.06	S	=	0.25	S	S	<=	0.5	S	S	=	1	I	ERMB	>	32	R	>	2	R	<=	1	S	<=	2	S	pos	neg
20156292	48	19to64	SAMN05222594	109	73672	131501	2094486	20	neg	1257	1	4	2	<=	0.03	S	S	<=	0.03	S	<=	0.06	S	<=	0.06	S	S	<=	0.5	S	S	<=	0.5	S	neg	=	0.06	S	=	0.06	S	<=	1	S	<=	2	S	neg	neg
20156294	67	>65	SAMN05222595	66	75102	274828	2089662	16F	neg	30	0	6	2	<=	0.03	S	S	<=	0.03	S	<=	0.06	S	<=	0.06	S	S	<=	0.5	S	S	<=	0.5	S	neg	=	0.06	S	=	0.06	S	<=	1	S	<=	2	S	neg	neg
20156295	69	>65	SAMN05222596	53	127273	349933	2114684	20	neg	276	17	15	18	=	2	R	S	=	0.5	S	=	0.25	S	=	1	I	S	=	1	I	S	>	2	R	ERMB	>	32	R	>	2	R	<=	1	S	<=	2	S	pos	FOLA-Q1H,Q11H,E14D,I20L:FOLP_180-ins
20156296	53	19to64	SAMN05222597	28	539649	637564	2061916	33F	neg	2705	2	0	6	<=	0.03	S	S	<=	0.03	S	<=	0.06	S	<=	0.06	S	S	<=	0.5	S	S	<=	0.5	S	MEF	=	8	R	=	0.06	S	<=	1	S	<=	2	S	neg	FOLP_189-ins
20156297	83	>65	SAMN05222598	52	93558	232314	1983305	12F	neg	220	0	0	17	<=	0.03	S	S	<=	0.03	S	<=	0.06	S	<=	0.06	S	S	<=	0.5	S	S	<=	0.5	S	neg	=	0.06	S	=	0.06	S	<=	1	S	<=	2	S	neg	neg
20156298	79	>65	SAMN05222599	46	93011	165470	2017452	35B	1	558	4	7	7	=	2	R	S	=	4	I	=	0.5	I	=	1	I	S	=	1	I	S	>	2	R	MEF	=	8	R	=	0.06	S	<=	1	S	<=	2	S	neg	neg
20156299	58	19to64	SAMN05222600	107	71193	156869	2046499	31	neg	10468	12	0	0	<=	0.03	S	S	<=	0.03	S	<=	0.06	S	<=	0.06	S	S	<=	0.5	S	S	<=	0.5	S	neg	=	0.06	S	=	0.06	S	<=	1	S	<=	2	S	neg	neg
20156301	70	>65	SAMN05222602	46	105877	262312	2011561	35B	1	558	4	7	7	=	2	R	S	=	4	I	=	0.5	I	=	1	I	S	=	1	I	S	>	2	R	MEF	=	8	R	=	0.06	S	<=	1	S	<=	2	S	neg	neg
20156302	83	>65	SAMN05222603	51	138585	275659	2085103	23A	neg	338	0	1	48	=	0.25	R	S	=	0.25	S	<=	0.06	S	=	0.12	S	S	<=	0.5	S	S	<=	0.5	S	neg	=	0.06	S	=	0.06	S	<=	1	S	<=	2	S	neg	FOLP_177-ins
20156303	48	19to64	SAMN05222604	248	39812	116802	2083001	35F	neg	11605	0	0	3	<=	0.03	S	S	<=	0.03	S	<=	0.06	S	<=	0.06	S	S	<=	0.5	S	S	<=	0.5	S	neg	=	0.06	S	=	0.06	S	<=	1	S	<=	2	S	neg	neg
20156304	50	19to64	SAMN05222605	66	121665	294303	2093342	23B	neg	1373	0	1	1	=	0.25	R	S	=	0.06	S	<=	0.06	S	=	0.12	S	S	<=	0.5	S	S	<=	0.5	S	neg	=	0.06	S	=	0.06	S	<=	1	S	<=	2	S	neg	FOLP_180-ins
20156305	2	0-4	SAMN05222606	37	148056	626355	2066384	10A	neg	97	0	0	2	<=	0.03	S	S	<=	0.03	S	<=	0.06	S	<=	0.06	S	S	<=	0.5	S	S	<=	0.5	S	neg	=	0.06	S	=	0.06	S	<=	1	S	<=	2	S	neg	neg
20156306	0	0-4	SAMN05222607	53	121543	296951	2039540	19A	1:2	320	13	11	26	=	4	R	I	=	8	R	=	1	R	=	4	R	R	=	4	R	R	>	2	R	ERMB:MEF	>	32	R	>	2	R	<=	1	S	<=	2	S	pos	FOLA-Q1Y,Q11H,E14D,I20L:FOLP_195-ins
20156307	ND	ND	SAMN05222608	64	119321	316416	2039178	19A	1:2	320	13	11	26	=	4	R	I	=	8	R	=	1	R	=	4	R	R	=	4	R	R	>	2	R	ERMB:MEF	>	32	R	>	2	R	<=	1	S	<=	2	S	pos	FOLA-Q1Y,Q11H,E14D,I20L:FOLP_195-ins
20156308	60	19to64	SAMN05222609	61	120975	342637	2010226	15A	neg	3058	0	4	2	<=	0.03	S	S	<=	0.03	S	<=	0.06	S	<=	0.06	S	S	<=	0.5	S	S	<=	0.5	S	neg	=	0.06	S	=	0.06	S	<=	1	S	<=	2	S	neg	neg
20156311	52	19to64	SAMN05222610	78	129502	208998	2084796	20	neg	1257	1	4	2	<=	0.03	S	S	<=	0.03	S	<=	0.06	S	<=	0.06	S	S	<=	0.5	S	S	<=	0.5	S	neg	=	0.06	S	=	0.06	S	<=	1	S	<=	2	S	neg	neg
20156312	55	19to64	SAMN05222611	49	185300	469050	1993596	8	neg	1480	3	5	5	<=	0.03	S	S	<=	0.03	S	<=	0.06	S	<=	0.06	S	S	<=	0.5	S	S	<=	0.5	S	neg	=	0.06	S	=	0.06	S	<=	1	S	<=	2	S	neg	neg
20156313	69	>65	SAMN05222612	64	69127	240914	2037864	10A	neg	1263	2	4	0	<=	0.03	S	S	<=	0.03	S	<=	0.06	S	<=	0.06	S	S	<=	0.5	S	S	<=	0.5	S	neg	=	0.06	S	=	0.06	S	<=	1	S	<=	2	S	neg	neg
20156314	44	19to64	SAMN05222613	115	67374	265879	2046714	22F	neg	7314	1	2	2	<=	0.03	S	S	<=	0.03	S	<=	0.06	S	<=	0.06	S	S	<=	0.5	S	S	<=	0.5	S	MEF	=	8	R	=	0.06	S	<=	1	S	<=	2	S	neg	neg
20156315	85	>65	SAMN05222614	40	260776	317141	2094481	19A	neg	230	17	7	8	=	2	R	S	=	1	S	=	0.5	I	=	0.5	S	S	<=	0.5	S	S	>	2	R	neg	=	0.06	S	=	0.06	S	<=	1	S	<=	2	S	neg	FOLA-Q1H,I20L:FOLP_180-ins
20156316	83	>65	SAMN05222615	62	129528	308800	1993624	3	neg	1119	0	0	2	<=	0.03	S	S	<=	0.03	S	<=	0.06	S	<=	0.06	S	S	<=	0.5	S	S	<=	0.5	S	neg	=	0.06	S	=	0.06	S	<=	1	S	<=	2	S	neg	neg
20156317	52	19to64	SAMN05222616	39	142208	450534	2076330	7C	neg	4510	12	0	3	<=	0.03	S	S	<=	0.03	S	<=	0.06	S	<=	0.06	S	S	<=	0.5	S	S	<=	0.5	S	neg	=	0.06	S	=	0.06	S	<=	1	S	<=	2	S	neg	neg
20156318	58	19to64	SAMN05222617	84	63462	227313	2069850	11A	2	62	2	6	0	<=	0.03	S	S	<=	0.03	S	<=	0.06	S	<=	0.06	S	S	<=	0.5	S	S	<=	0.5	S	neg	=	0.06	S	=	0.06	S	<=	1	S	<=	2	S	neg	neg
20156540	58	19to64	SAMN05222619	39	93466	260124	2012380	35B	1	558	4	7	7	=	2	R	S	=	4	I	=	0.5	I	=	1	I	S	=	1	I	S	>	2	R	neg	=	0.06	S	=	0.06	S	<=	1	S	<=	2	S	neg	neg
20156541	4	0-4	SAMN05222620	84	83612	237627	2051136	34	neg	1046	1	0	2	<=	0.03	S	S	<=	0.03	S	<=	0.06	S	<=	0.06	S	S	<=	0.5	S	S	<=	0.5	S	neg	=	0.06	S	=	0.06	S	<=	1	S	<=	2	S	neg	FOLA-Q1H,I20L:FOLP_169-ins
20156542	58	19to64	SAMN05222621	74	54211	190107	2122538	4	1	244	0	0	3	<=	0.03	S	S	<=	0.03	S	<=	0.06	S	<=	0.06	S	S	<=	0.5	S	S	<=	0.5	S	neg	=	0.06	S	=	0.06	S	<=	1	S	<=	2	S	neg	FOLA-Q11H,E14D,I20L:FOLP_178-ins
20156543	49	19to64	SAMN05222622	68	76216	298447	2054488	22F	neg	7314	1	2	2	<=	0.03	S	S	<=	0.03	S	<=	0.06	S	<=	0.06	S	S	<=	0.5	S	S	<=	0.5	S	MEF	=	8	R	=	0.06	S	<=	1	S	<=	2	S	neg	neg
20156544	47	19to64	SAMN05222623	57	95623	192778	2076309	20	neg	1030	1	44	2	<=	0.03	S	S	<=	0.03	S	<=	0.06	S	<=	0.06	S	S	<=	0.5	S	S	<=	0.5	S	neg	=	0.06	S	=	0.06	S	<=	1	S	<=	2	S	neg	neg
20156545	1	0-4	SAMN05222624	70	74713	197648	2080241	10A	neg	1263	2	4	0	<=	0.03	S	S	<=	0.03	S	<=	0.06	S	<=	0.06	S	S	<=	0.5	S	S	<=	0.5	S	neg	=	0.06	S	=	0.06	S	<=	1	S	<=	2	S	neg	neg
20156546	1	0-4	SAMN05222625	57	77072	261490	2070782	22F	neg	11568	1	2	2	<=	0.03	S	S	<=	0.03	S	<=	0.06	S	<=	0.06	S	S	<=	0.5	S	S	<=	0.5	S	neg	=	0.06	S	=	0.06	S	<=	1	S	<=	2	S	neg	neg
20156547	66	>65	SAMN05222626	21	174681	380848	1988179	3	neg	180	2	3	2	<=	0.03	S	S	<=	0.03	S	<=	0.06	S	<=	0.06	S	S	<=	0.5	S	S	<=	0.5	S	neg	=	0.06	S	=	0.06	S	<=	1	S	<=	2	S	neg	neg
20156548	49	19to64	SAMN05222627	68	72760	262448	2082802	19A	neg	199	0	29	11	=	0.12	R	S	=	0.12	S	<=	0.06	S	<=	0.06	S	S	<=	0.5	S	S	<=	0.5	S	neg	=	0.06	S	=	0.06	S	<=	1	S	<=	2	S	neg	neg
20156549	55	19to64	SAMN05222628	53	151147	266443	2106096	16F	neg	11569	0	10	14	=	0.06	S	S	<=	0.03	S	<=	0.06	S	=	0.12	S	S	<=	0.5	S	S	<=	0.5	S	neg	=	0.06	S	=	0.06	S	<=	1	S	<=	2	S	neg	neg
20156550	79	>65	SAMN05222629	44	144434	216344	1980662	3	neg	180	2	0	2	<=	0.03	S	S	<=	0.03	S	<=	0.06	S	<=	0.06	S	S	<=	0.5	S	S	<=	0.5	S	neg	=	0.06	S	=	0.06	S	<=	1	S	<=	2	S	neg	neg
20156551	40	19to64	SAMN05222630	95	39747	112231	2121636	4	1	244	0	0	3	<=	0.03	S	S	<=	0.03	S	<=	0.06	S	<=	0.06	S	S	<=	0.5	S	S	<=	0.5	S	neg	=	0.06	S	=	0.06	S	<=	1	S	<=	2	S	neg	FOLA-Q11H,E14D,I20L:FOLP_178-ins
20156552	50	19to64	SAMN05222631	56	90510	184327	2003371	15A	neg	10479	23	2	0	<=	0.03	S	S	<=	0.03	S	<=	0.06	S	<=	0.06	S	S	<=	0.5	S	S	<=	0.5	S	neg	=	0.06	S	=	0.06	S	<=	1	S	<=	2	S	neg	neg
20156553	21	19to64	SAMN05222632	80	61821	135097	2116614	4	1	244	0	0	3	<=	0.03	S	S	<=	0.03	S	<=	0.06	S	<=	0.06	S	S	<=	0.5	S	S	<=	0.5	S	neg	=	0.06	S	=	0.06	S	<=	1	S	<=	2	S	neg	FOLA-Q11H,E14D,I20L:FOLP_178-ins
20156554	54	19to64	SAMN05222633	120	55883	132429	2135792	19F	2	654	2	0	0	<=	0.03	S	S	<=	0.03	S	<=	0.06	S	<=	0.06	S	S	<=	0.5	S	S	<=	0.5	S	neg	=	0.06	S	=	0.06	S	<=	1	S	<=	2	S	neg	neg
20156555	65	>65	SAMN05222634	56	93954	328270	1994766	9N	neg	4666	23	0	0	<=	0.03	S	S	<=	0.03	S	<=	0.06	S	<=	0.06	S	S	<=	0.5	S	S	<=	0.5	S	neg	=	0.06	S	=	0.06	S	<=	1	S	<=	2	S	neg	neg
20156557	46	19to64	SAMN05222636	64	83532	176314	2119633	4	1	244	0	0	3	<=	0.03	S	S	<=	0.03	S	<=	0.06	S	<=	0.06	S	S	<=	0.5	S	S	<=	0.5	S	neg	=	0.06	S	=	0.06	S	<=	1	S	<=	2	S	neg	FOLA-Q11H,E14D,I20L:FOLP_178-ins
20156558	86	>65	SAMN05222637	32	232933	288340	1978786	3	neg	180	2	0	2	<=	0.03	S	S	<=	0.03	S	<=	0.06	S	<=	0.06	S	S	<=	0.5	S	S	<=	0.5	S	neg	=	0.06	S	=	0.06	S	<=	1	S	<=	2	S	neg	neg
20156560	80	>65	SAMN05222639	34	188001	263319	1976421	3	neg	180	2	0	2	<=	0.03	S	S	<=	0.03	S	<=	0.06	S	<=	0.06	S	S	<=	0.5	S	S	<=	0.5	S	neg	=	0.06	S	=	0.06	S	<=	1	S	<=	2	S	neg	neg
20156561	71	>65	SAMN05222640	143	50150	189551	2059350	20	neg	5190	1	102	23	<=	0.03	S	S	<=	0.03	S	<=	0.06	S	<=	0.06	S	S	<=	0.5	S	S	<=	0.5	S	neg	=	0.06	S	=	0.06	S	<=	1	S	<=	2	S	neg	neg
20156562	44	19to64	SAMN05222641	177	46812	124861	2102538	35F	neg	446	0	0	170	<=	0.03	S	S	<=	0.03	S	<=	0.06	S	<=	0.06	S	S	<=	0.5	S	S	<=	0.5	S	neg	=	0.06	S	=	0.06	S	<=	1	S	<=	2	S	neg	neg
20156563	62	19to64	SAMN05222642	81	90171	205155	2077550	20	neg	1030	1	44	2	<=	0.03	S	S	<=	0.03	S	<=	0.06	S	<=	0.06	S	S	<=	0.5	S	S	<=	0.5	S	neg	=	0.06	S	=	0.06	S	<=	1	S	<=	2	S	neg	neg
20156564	81	>65	SAMN05222643	43	161073	286050	2133579	23B	neg	1373	0	1	1	=	0.25	R	S	=	0.06	S	<=	0.06	S	=	0.12	S	S	<=	0.5	S	S	<=	0.5	S	neg	=	0.06	S	=	0.06	S	<=	1	S	<=	2	S	neg	FOLP_180-ins
20156565	89	>65	SAMN05222644	62	166732	510562	2070792	6C	neg	1292	19	31	8	=	1	R	S	=	1	S	=	0.12	S	=	0.25	S	S	<=	0.5	S	S	=	2	R	MEF	=	8	R	=	0.06	S	<=	1	S	<=	2	S	neg	FOLP_173-ins
20156566	94	>65	SAMN05222645	53	82671	176471	2082136	17F	neg	392	11	0	0	<=	0.03	S	S	<=	0.03	S	<=	0.06	S	<=	0.06	S	S	<=	0.5	S	S	<=	0.5	S	neg	=	0.06	S	=	0.06	S	<=	1	S	<=	2	S	neg	neg
20156567	96	>65	SAMN05222646	25	193422	281780	1975901	3	neg	180	2	0	2	<=	0.03	S	S	<=	0.03	S	<=	0.06	S	<=	0.06	S	S	<=	0.5	S	S	<=	0.5	S	neg	=	0.06	S	=	0.06	S	<=	1	S	<=	2	S	neg	neg
20156568	80	>65	SAMN05222647	287	35028	115324	2060800	6C	neg	1379	19	31	8	=	1	R	S	=	1	S	=	0.12	S	=	0.25	S	S	<=	0.5	S	S	=	2	R	MEF	=	8	R	=	0.06	S	<=	1	S	<=	2	S	neg	FOLA-Q1H,I20L:FOLP_173-ins
20156569	74	>65	SAMN05222648	79	59078	157564	2113628	19F	2	251	2	0	0	<=	0.03	S	S	<=	0.03	S	<=	0.06	S	<=	0.06	S	S	<=	0.5	S	S	<=	0.5	S	neg	=	0.06	S	=	0.06	S	<=	1	S	<=	2	S	neg	neg
20156570	78	>65	SAMN05222649	111	79161	162533	2154155	15A	1	58	0	0	3	<=	0.03	S	S	<=	0.03	S	<=	0.06	S	<=	0.06	S	S	<=	0.5	S	S	<=	0.5	S	neg	=	0.06	S	=	0.06	S	<=	1	S	<=	2	S	neg	neg
20156571	75	>65	SAMN05222650	129	43858	79100	2114779	22F	neg	433	1	2	2	<=	0.03	S	S	<=	0.03	S	<=	0.06	S	<=	0.06	S	S	<=	0.5	S	S	<=	0.5	S	neg	=	0.06	S	=	0.06	S	<=	1	S	<=	2	S	neg	neg
20156572	50	19to64	SAMN05222651	62	118290	224772	2080751	16F	neg	1840	0	10	2	<=	0.03	S	S	<=	0.03	S	<=	0.06	S	<=	0.06	S	S	<=	0.5	S	S	<=	0.5	S	neg	=	0.06	S	=	0.06	S	<=	1	S	<=	2	S	neg	neg
20156573	67	>65	SAMN05222652	65	53319	141665	2021410	3	neg	180	2	3	2	<=	0.03	S	S	<=	0.03	S	<=	0.06	S	<=	0.06	S	S	<=	0.5	S	S	<=	0.5	S	neg	=	0.06	S	=	0.06	S	<=	1	S	<=	2	S	neg	neg
20156574	78	>65	SAMN05222653	62	67279	178208	2108132	34	neg	547	0	0	2	<=	0.03	S	S	<=	0.03	S	<=	0.06	S	<=	0.06	S	S	<=	0.5	S	S	<=	0.5	S	neg	=	0.06	S	=	0.06	S	<=	1	S	<=	2	S	neg	neg
20156575	80	>65	SAMN05222654	163	90513	216260	2172627	23B	neg	1373	0	1	1	=	0.25	R	S	=	0.06	S	<=	0.06	S	=	0.12	S	S	<=	0.5	S	S	<=	0.5	S	neg	=	0.06	S	=	0.06	S	<=	1	S	<=	2	S	neg	FOLP_180-ins
20156577	60	19to64	SAMN05222656	70	64357	135118	2118797	4	1	244	0	0	3	<=	0.03	S	S	<=	0.03	S	<=	0.06	S	<=	0.06	S	S	<=	0.5	S	S	<=	0.5	S	neg	=	0.06	S	=	0.06	S	<=	1	S	<=	2	S	neg	FOLA-Q11H,E14D,I20L:FOLP_178-ins
20156578	77	>65	SAMN05222657	33	260542	315785	1975555	3	neg	180	2	0	2	<=	0.03	S	S	<=	0.03	S	<=	0.06	S	<=	0.06	S	S	<=	0.5	S	S	<=	0.5	S	neg	=	0.06	S	=	0.06	S	<=	1	S	<=	2	S	neg	neg
20156579	91	>65	SAMN05222658	41	108402	268008	2015004	3	neg	180	2	3	2	<=	0.03	S	S	<=	0.03	S	<=	0.06	S	<=	0.06	S	S	<=	0.5	S	S	<=	0.5	S	neg	=	0.06	S	=	0.06	S	<=	1	S	<=	2	S	neg	neg
20156580	89	>65	SAMN05222659	44	122777	242241	1997254	3	neg	11599	62	0	2	<=	0.03	S	S	<=	0.03	S	<=	0.06	S	<=	0.06	S	S	<=	0.5	S	S	<=	0.5	S	neg	=	0.06	S	=	0.06	S	<=	1	S	<=	2	S	neg	neg
20156581	94	>65	SAMN05222660	38	89912	316755	2001912	35B	1	558	4	7	7	=	2	R	S	=	4	I	=	0.5	I	=	1	I	S	=	1	I	S	>	2	R	MEF	=	8	R	=	0.06	S	<=	1	S	<=	2	S	neg	neg
20156582	90	>65	SAMN05222661	88	264879	287217	2061900	6C	neg	1292	19	31	8	=	1	R	S	=	1	S	=	0.12	S	=	0.25	S	S	<=	0.5	S	S	=	2	R	MEF	=	8	R	=	0.06	S	<=	1	S	<=	2	S	neg	FOLP_173-ins
20156583	76	>65	SAMN05222662	122	95977	181075	2043373	28A	neg	546	2	2	69	=	0.06	S	S	<=	0.03	S	<=	0.06	S	<=	0.06	S	S	<=	0.5	S	S	<=	0.5	S	neg	=	0.06	S	=	0.06	S	<=	1	S	<=	2	S	neg	FOLP_189-ins
20156584	81	>65	SAMN05222663	31	260568	315813	1976703	3	neg	180	2	0	2	<=	0.03	S	S	<=	0.03	S	<=	0.06	S	<=	0.06	S	S	<=	0.5	S	S	<=	0.5	S	neg	=	0.06	S	=	0.06	S	<=	1	S	<=	2	S	neg	neg
20156585	43	19to64	SAMN05222664	110	76473	215233	2139904	23B	neg	1373	0	1	1	=	0.25	R	S	=	0.06	S	<=	0.06	S	=	0.12	S	S	<=	0.5	S	S	<=	0.5	S	neg	=	0.06	S	=	0.06	S	<=	1	S	<=	2	S	neg	FOLP_180-ins
20156586	55	19to64	SAMN05222665	79	61185	121928	2119680	4	1	244	0	0	3	<=	0.03	S	S	<=	0.03	S	<=	0.06	S	<=	0.06	S	S	<=	0.5	S	S	<=	0.5	S	neg	=	0.06	S	=	0.06	S	<=	1	S	<=	2	S	neg	FOLA-Q11H,E14D,I20L:FOLP_178-ins
20156587	64	19to64	SAMN05222666	26	165023	391989	2049854	33F	neg	100	2	0	6	<=	0.03	S	S	<=	0.03	S	<=	0.06	S	<=	0.06	S	S	<=	0.5	S	S	<=	0.5	S	MEF	=	8	R	=	0.06	S	<=	1	S	<=	2	S	neg	FOLP_189-ins
20156588	56	19to64	SAMN05222667	50	102589	298503	2056261	22F	neg	7314	1	2	2	<=	0.03	S	S	<=	0.03	S	<=	0.06	S	<=	0.06	S	S	<=	0.5	S	S	<=	0.5	S	MEF	=	8	R	=	0.06	S	<=	1	S	<=	2	S	neg	neg
20156589	66	>65	SAMN05222668	49	121473	335471	2041438	19A	1	320	13	11	16	=	4	R	I	=	8	R	=	1	R	=	2	R	I	=	2	R	I	>	2	R	ERMB:MEF	>	32	R	>	2	R	<=	1	S	<=	2	S	pos	FOLA-Q1Y,Q11H,E14D,I20L:FOLP_195-ins
20156590	65	>65	SAMN05222669	52	72423	308797	2044382	19A	1:2	320	13	11	16	=	4	R	I	=	8	R	=	1	R	=	2	R	I	=	2	R	I	>	2	R	ERMB:MEF	>	32	R	>	2	R	<=	1	S	<=	2	S	pos	FOLA-Q1Y,Q11H,E14D,I20L:FOLP_195-ins
20156591	ND	ND	SAMN05222670	64	74226	189997	2142521	23B	neg	1847	0	0	0	<=	0.03	S	S	<=	0.03	S	<=	0.06	S	<=	0.06	S	S	<=	0.5	S	S	<=	0.5	S	neg	=	0.06	S	=	0.06	S	<=	1	S	<=	2	S	neg	neg
20156617	52	19to64	SAMN05222671	80	64912	157679	2114481	6C	1	490	1	4	2	<=	0.03	S	S	<=	0.03	S	<=	0.06	S	<=	0.06	S	S	<=	0.5	S	S	<=	0.5	S	MEF	=	8	R	=	0.06	S	<=	1	S	<=	2	S	neg	FOLA-Q1Y,I20L
20156645	64	19to64	SAMN05222672	118	37721	79946	2125677	9N	neg	66	1	0	0	<=	0.03	S	S	<=	0.03	S	<=	0.06	S	<=	0.06	S	S	<=	0.5	S	S	<=	0.5	S	neg	=	0.06	S	=	0.06	S	<=	1	S	<=	2	S	neg	neg
20156646	42	19to64	SAMN05222673	54	76121	199925	2127807	23A	neg	11564	2	0	6	<=	0.03	S	S	<=	0.03	S	<=	0.06	S	<=	0.06	S	S	<=	0.5	S	S	<=	0.5	S	ERMB:ERMBUP	>	32	R	>	2	R	<=	1	S	<=	2	S	pos	FOLA-Q1H,I20L:FOLP_169-ins
20156647	54	19to64	SAMN05222674	68	57687	177523	2074269	22F	neg	433	1	2	2	<=	0.03	S	S	<=	0.03	S	<=	0.06	S	<=	0.06	S	S	<=	0.5	S	S	<=	0.5	S	neg	=	0.06	S	=	0.06	S	<=	1	S	<=	2	S	neg	neg
20156648	54	19to64	SAMN05222675	69	64193	145679	2078491	4	1	247	0	0	3	<=	0.03	S	S	<=	0.03	S	<=	0.06	S	<=	0.06	S	S	<=	0.5	S	S	<=	0.5	S	neg	=	0.06	S	=	0.06	S	<=	1	S	<=	2	S	neg	neg
20156649	85	>65	SAMN05222676	44	94017	223461	2043265	35B	1	558	4	7	7	=	2	R	S	=	4	I	=	0.5	I	=	1	I	S	=	1	I	S	>	2	R	MEF	=	8	R	=	0.06	S	<=	1	S	<=	2	S	neg	neg
20156650	48	19to64	SAMN05222677	51	68961	249725	2069866	33F	neg	2705	2	0	6	<=	0.03	S	S	<=	0.03	S	<=	0.06	S	<=	0.06	S	S	<=	0.5	S	S	<=	0.5	S	MEF	=	8	R	=	0.06	S	<=	1	S	<=	2	S	neg	FOLP_189-ins
20156651	73	>65	SAMN05222678	42	131611	273979	1975138	3	neg	180	2	0	2	<=	0.03	S	S	<=	0.03	S	<=	0.06	S	<=	0.06	S	S	<=	0.5	S	S	<=	0.5	S	neg	=	0.06	S	=	0.06	S	<=	1	S	<=	2	S	neg	neg
20156652	56	19to64	SAMN05222679	355	22725	111432	2053332	22F	neg	433	1	2	2	<=	0.03	S	S	<=	0.03	S	<=	0.06	S	<=	0.06	S	S	<=	0.5	S	S	<=	0.5	S	neg	=	0.06	S	=	0.06	S	<=	1	S	<=	2	S	neg	neg
20156653	68	>65	SAMN05222680	62	75868	138951	2071837	34	neg	11573	2	4	0	<=	0.03	S	S	<=	0.03	S	<=	0.06	S	<=	0.06	S	S	<=	0.5	S	S	<=	0.5	S	neg	=	0.06	S	=	0.06	S	<=	1	S	<=	2	S	neg	FOLA-V3I,I20L:FOLP_169-ins
20156654	68	>65	SAMN05222681	56	98619	195962	2028729	3	neg	180	2	3	2	<=	0.03	S	S	<=	0.03	S	<=	0.06	S	<=	0.06	S	S	<=	0.5	S	S	<=	0.5	S	neg	=	0.06	S	=	0.06	S	<=	1	S	<=	2	S	neg	neg
20156655	43	19to64	SAMN05222682	69	89626	130261	2079200	15A	neg	63	24	27	28	=	0.25	R	S	<=	0.03	S	<=	0.06	S	=	0.12	S	S	<=	0.5	S	S	<=	0.5	S	ERMB	>	32	R	>	2	R	<=	1	S	<=	2	S	pos	neg
20156656	61	19to64	SAMN05222683	335	22003	105982	2109474	19F	2	654	2	0	0	<=	0.03	S	S	<=	0.03	S	<=	0.06	S	<=	0.06	S	S	<=	0.5	S	S	<=	0.5	S	neg	=	0.06	S	=	0.06	S	<=	1	S	<=	2	S	neg	neg
20156657	72	>65	SAMN05222684	62	89142	282316	2073511	6C	neg	11592	2	0	2	<=	0.03	S	S	<=	0.03	S	<=	0.06	S	<=	0.06	S	S	<=	0.5	S	S	<=	0.5	S	neg	=	0.06	S	=	0.06	S	<=	1	S	<=	2	S	neg	neg
20156658	71	>65	SAMN05222685	88	54713	172321	2121965	34	neg	547	0	0	2	<=	0.03	S	S	<=	0.03	S	<=	0.06	S	<=	0.06	S	S	<=	0.5	S	S	<=	0.5	S	neg	=	0.06	S	=	0.06	S	<=	1	S	<=	2	S	neg	neg
20156659	91	>65	SAMN05222686	52	82226	173218	2048440	35B	1	558	4	7	7	=	2	R	S	=	4	I	=	0.5	I	=	1	I	S	=	1	I	S	>	2	R	neg	=	0.06	S	=	0.06	S	<=	1	S	<=	2	S	neg	neg
20156660	71	>65	SAMN05222687	44	128325	335802	2101901	15C	1	3280	7	8	9	=	0.25	R	S	=	0.5	S	=	0.12	S	=	0.12	S	S	<=	0.5	S	S	<=	0.5	S	MEF	=	8	R	=	0.06	S	<=	1	S	<=	2	S	neg	FOLP_177-ins:FOLP_180-ins
20156661	66	>65	SAMN05222688	57	86964	291554	2014386	11A	2	62	2	6	0	<=	0.03	S	S	<=	0.03	S	<=	0.06	S	<=	0.06	S	S	<=	0.5	S	S	<=	0.5	S	neg	=	0.06	S	=	0.06	S	<=	1	S	<=	2	S	neg	neg
20156662	86	>65	SAMN05222689	97	52117	184824	2183465	6C	1	490	1	4	2	<=	0.03	S	S	<=	0.03	S	<=	0.06	S	<=	0.06	S	S	<=	0.5	S	S	<=	0.5	S	MEF	=	8	R	=	0.06	S	<=	1	S	<=	2	S	neg	FOLA-Q1Y,I20L
20156663	91	>65	SAMN05222690	59	66942	176948	2056685	23A	neg	42	2	0	6	<=	0.03	S	S	<=	0.03	S	<=	0.06	S	<=	0.06	S	S	<=	0.5	S	S	<=	0.5	S	neg	=	0.06	S	=	0.06	S	<=	1	S	<=	2	S	neg	neg
20156664	35	19to64	SAMN05222691	62	72163	194272	2095094	16F	neg	995	9	4	3	<=	0.03	S	S	<=	0.03	S	<=	0.06	S	<=	0.06	S	S	<=	0.5	S	S	<=	0.5	S	neg	=	0.06	S	=	0.06	S	<=	1	S	<=	2	S	neg	neg
20156665	92	>65	SAMN05222692	81	58211	149612	2028607	31	neg	3639	12	0	0	<=	0.03	S	S	<=	0.03	S	<=	0.06	S	<=	0.06	S	S	<=	0.5	S	S	<=	0.5	S	neg	=	0.06	S	=	0.06	S	<=	1	S	<=	2	S	neg	neg
20156666	96	>65	SAMN05222693	42	101185	256672	2015941	35B	1	11603	4	7	7	=	2	R	S	=	4	I	=	0.5	I	=	1	I	S	=	1	I	S	>	2	R	MEF	=	8	R	=	0.06	S	<=	1	S	<=	2	S	neg	neg
20156667	104	>65	SAMN05222694	49	96158	257889	2076284	15A	neg	63	24	27	11	=	0.12	R	S	=	0.12	S	<=	0.06	S	<=	0.06	S	S	<=	0.5	S	S	<=	0.5	S	ERMB	>	32	R	>	2	R	<=	1	S	<=	2	S	pos	FOLP_178-ins
20156668	84	>65	SAMN05222695	43	197243	381162	2012032	3	neg	180	2	3	2	<=	0.03	S	S	<=	0.03	S	<=	0.06	S	<=	0.06	S	S	<=	0.5	S	S	<=	0.5	S	neg	=	0.06	S	=	0.06	S	<=	1	S	<=	2	S	neg	neg
20156669	49	19to64	SAMN05222696	140	44190	102162	2193201	19A	1	695	8	0	11	=	0.12	R	S	=	0.06	S	<=	0.06	S	<=	0.06	S	S	<=	0.5	S	S	<=	0.5	S	MEF	=	8	R	=	0.06	S	<=	1	S	<=	2	S	neg	neg
20156670	62	19to64	SAMN05222697	77	68029	161459	2014075	35B	1	558	4	7	7	=	2	R	S	=	4	I	=	0.5	I	=	1	I	S	=	1	I	S	>	2	R	MEF	=	8	R	=	0.06	S	<=	1	S	<=	2	S	neg	neg
20156671	66	>65	SAMN05222698	50	86454	243066	2068866	23B	neg	439	0	0	0	<=	0.03	S	S	<=	0.03	S	<=	0.06	S	<=	0.06	S	S	<=	0.5	S	S	<=	0.5	S	neg	=	0.06	S	=	0.06	S	<=	1	S	<=	2	S	neg	neg
20156672	39	19to64	SAMN05222699	102	59053	187398	2052032	11A	2	62	2	6	0	<=	0.03	S	S	<=	0.03	S	<=	0.06	S	<=	0.06	S	S	<=	0.5	S	S	<=	0.5	S	neg	=	0.06	S	=	0.06	S	<=	1	S	<=	2	S	neg	neg
20156673	78	>65	SAMN05222700	42	133210	415266	2008768	11A	neg	62	2	106	153	<=	0.03	S	S	<=	0.03	S	<=	0.06	S	<=	0.06	S	S	<=	0.5	S	S	<=	0.5	S	neg	=	0.06	S	=	0.06	S	<=	1	S	<=	2	S	neg	neg
20156674	57	19to64	SAMN05222701	81	96508	224891	2176515	23B	neg	338	0	1	1	=	0.25	R	S	=	0.06	S	<=	0.06	S	=	0.12	S	S	<=	0.5	S	S	<=	0.5	S	neg	=	0.06	S	=	0.06	S	<=	1	S	<=	2	S	neg	neg
20156675	0	0-4	SAMN05222702	148	45996	179812	2100102	35F	neg	498	0	0	3	<=	0.03	S	S	<=	0.03	S	<=	0.06	S	<=	0.06	S	S	<=	0.5	S	S	<=	0.5	S	neg	=	0.06	S	=	0.06	S	<=	1	S	<=	2	S	neg	neg
20156676	65	>65	SAMN05222703	38	102428	323058	1983126	33F	neg	11574	2	105	2	<=	0.03	S	S	<=	0.03	S	<=	0.06	S	<=	0.06	S	S	<=	0.5	S	S	<=	0.5	S	neg	=	0.06	S	=	0.06	S	<=	1	S	<=	2	S	neg	neg
20156677	50	19to64	SAMN05222704	58	88931	166037	2018268	35B	1	558	4	7	7	=	2	R	S	=	4	I	=	0.5	I	=	1	I	S	=	1	I	S	>	2	R	neg	=	0.06	S	=	0.06	S	<=	1	S	<=	2	S	neg	neg
20156678	86	>65	SAMN05222705	46	105511	221450	2017622	35B	1	558	4	7	7	=	2	R	S	=	4	I	=	0.5	I	=	1	I	S	=	1	I	S	>	2	R	MEF	=	8	R	=	0.06	S	<=	1	S	<=	2	S	neg	neg
20156679	81	>65	SAMN05222706	72	75990	332164	2100508	20	neg	1257	1	4	2	<=	0.03	S	S	<=	0.03	S	<=	0.06	S	<=	0.06	S	S	<=	0.5	S	S	<=	0.5	S	neg	=	0.06	S	=	0.06	S	<=	1	S	<=	2	S	neg	neg
20156680	58	19to64	SAMN05222707	48	128962	383316	2067208	35F	neg	498	0	0	3	<=	0.03	S	S	<=	0.03	S	<=	0.06	S	<=	0.06	S	S	<=	0.5	S	S	<=	0.5	S	neg	=	0.06	S	=	0.06	S	<=	1	S	<=	2	S	neg	neg
20156681	72	>65	SAMN05222708	54	77265	287842	2114677	23B	neg	439	0	0	0	<=	0.03	S	S	<=	0.03	S	<=	0.06	S	<=	0.06	S	S	<=	0.5	S	S	<=	0.5	S	MEF	=	8	R	=	0.06	S	<=	1	S	<=	2	S	neg	neg
20156682	41	19to64	SAMN05222709	72	70135	266230	2162680	15B	1	162	1	0	0	<=	0.03	S	S	<=	0.03	S	<=	0.06	S	<=	0.06	S	S	<=	0.5	S	S	<=	0.5	S	neg	=	0.06	S	=	0.06	S	<=	1	S	<=	2	S	neg	neg
20156683	58	19to64	SAMN05222710	47	133853	263300	2075433	6C	neg	1379	19	31	8	=	1	R	S	=	1	S	=	0.12	S	=	0.25	S	S	<=	0.5	S	S	=	2	R	MEF	=	8	R	=	0.06	S	<=	1	S	<=	2	S	neg	FOLA-Q1H,I20L:FOLP_173-ins
20156684	53	19to64	SAMN05222711	67	65571	161938	2086955	35B	neg	452	0	0	0	<=	0.03	S	S	<=	0.03	S	<=	0.06	S	<=	0.06	S	S	<=	0.5	S	S	<=	0.5	S	MEF	=	8	R	=	0.06	S	<=	1	S	<=	2	S	neg	neg
20156685	63	19to64	SAMN05222712	42	160290	282695	2067111	15A	neg	63	24	27	28	=	0.25	R	S	<=	0.03	S	<=	0.06	S	=	0.12	S	S	<=	0.5	S	S	<=	0.5	S	ERMB	>	32	R	>	2	R	<=	1	S	<=	2	S	pos	neg
20156686	20	19to64	SAMN05222713	83	60876	265791	2167830	15C	1	162	1	0	0	<=	0.03	S	S	<=	0.03	S	<=	0.06	S	<=	0.06	S	S	<=	0.5	S	S	<=	0.5	S	neg	=	0.06	S	=	0.06	S	<=	1	S	<=	2	S	neg	neg
20156688	55	19to64	SAMN05222714	32	136291	375606	2052884	16F	neg	659	9	0	3	<=	0.03	S	S	<=	0.03	S	<=	0.06	S	<=	0.06	S	S	<=	0.5	S	S	<=	0.5	S	neg	=	0.06	S	=	0.06	S	<=	1	S	<=	2	S	neg	neg
20156689	68	>65	SAMN05222715	34	106121	279453	2015864	35B	1	558	4	7	7	=	2	R	S	=	4	I	=	0.5	I	=	1	I	S	=	1	I	S	>	2	R	MEF	=	8	R	=	0.06	S	<=	1	S	<=	2	S	neg	neg
20156690	59	19to64	SAMN05222716	285	42242	146737	1966771	3	neg	180	2	0	2	<=	0.03	S	S	<=	0.03	S	<=	0.06	S	<=	0.06	S	S	<=	0.5	S	S	<=	0.5	S	neg	=	0.06	S	=	0.06	S	<=	1	S	<=	2	S	neg	neg
20156691	54	19to64	SAMN05222717	19	291695	403162	2067077	33F	neg	2705	2	0	6	<=	0.03	S	S	<=	0.03	S	<=	0.06	S	<=	0.06	S	S	<=	0.5	S	S	<=	0.5	S	MEF	=	8	R	=	0.06	S	<=	1	S	<=	2	S	neg	FOLP_189-ins
20156692	90	>65	SAMN05222718	43	164530	411865	2074776	15A	neg	63	24	27	13	=	0.25	R	S	=	0.25	S	<=	0.06	S	=	0.25	S	S	<=	0.5	S	S	<=	0.5	S	ERMB	>	32	R	>	2	R	<=	1	S	<=	2	S	pos	FOLP_180-ins
20156693	0	0-4	SAMN05222719	34	200342	383430	2044371	3	neg	180	2	0	2	<=	0.03	S	S	<=	0.03	S	<=	0.06	S	<=	0.06	S	S	<=	0.5	S	S	<=	0.5	S	ERMB:ERMBS:ERMBUP	=	0.06	S	=	0.06	S	<=	1	S	<=	2	S	neg	neg
20156694	72	>65	SAMN05222720	76	69008	270156	2109025	15B	neg	1262	2	0	2	<=	0.03	S	S	<=	0.03	S	<=	0.06	S	<=	0.06	S	S	<=	0.5	S	S	<=	0.5	S	neg	=	0.06	S	=	0.06	S	<=	1	S	<=	2	S	neg	FOLP_176-ins
20156695	47	19to64	SAMN05222721	55	144006	204804	2067947	6C	neg	1379	19	31	8	=	1	R	S	=	1	S	=	0.12	S	=	0.25	S	S	<=	0.5	S	S	=	2	R	MEF	=	8	R	=	0.06	S	<=	1	S	<=	2	S	neg	FOLA-Q1H,I20L:FOLP_173-ins
20156696	43	19to64	SAMN05222722	136	60909	184170	2087368	17F	neg	11273	1	0	129	=	0.12	R	S	<=	0.03	S	<=	0.06	S	=	0.12	S	S	<=	0.5	S	S	<=	0.5	S	neg	=	0.06	S	=	0.06	S	<=	1	S	<=	2	S	neg	neg
20156697	26	19to64	SAMN05222723	22	255438	412234	2051653	33F	neg	100	2	0	6	<=	0.03	S	S	<=	0.03	S	<=	0.06	S	<=	0.06	S	S	<=	0.5	S	S	<=	0.5	S	MEF	=	8	R	=	0.06	S	<=	1	S	<=	2	S	neg	FOLP_189-ins
20156698	68	>65	SAMN05222724	29	167784	522205	2026906	33F	neg	100	2	0	6	<=	0.03	S	S	<=	0.03	S	<=	0.06	S	<=	0.06	S	S	<=	0.5	S	S	<=	0.5	S	MEF	=	8	R	=	0.06	S	<=	1	S	<=	2	S	neg	FOLP_189-ins
20156699	50	19to64	SAMN05222725	48	153414	305903	2099279	23A	neg	338	0	1	1	=	0.25	R	S	=	0.06	S	<=	0.06	S	=	0.12	S	S	<=	0.5	S	S	<=	0.5	S	neg	=	0.06	S	=	0.06	S	<=	1	S	<=	2	S	neg	neg
20156700	59	19to64	SAMN05222726	66	93355	275029	2083781	17F	neg	1924	11	0	172	<=	0.03	S	S	<=	0.03	S	<=	0.06	S	<=	0.06	S	S	<=	0.5	S	S	<=	0.5	S	neg	=	0.06	S	=	0.06	S	<=	1	S	<=	2	S	neg	neg
20156701	76	>65	SAMN05222727	50	127501	429852	2070810	15B	neg	199	2	0	12	<=	0.03	S	S	<=	0.03	S	<=	0.06	S	<=	0.06	S	S	<=	0.5	S	S	<=	0.5	S	neg	=	0.06	S	=	0.06	S	<=	1	S	<=	2	S	neg	neg
20156702	46	19to64	SAMN05222728	63	120746	263450	2072148	15B	neg	199	2	0	2	<=	0.03	S	S	<=	0.03	S	<=	0.06	S	<=	0.06	S	S	<=	0.5	S	S	<=	0.5	S	MEF	=	8	R	=	0.06	S	<=	1	S	<=	2	S	neg	neg
20156703	53	19to64	SAMN05222729	136	51764	164791	2127257	7C	neg	1797	2	4	6	<=	0.03	S	S	<=	0.03	S	<=	0.06	S	<=	0.06	S	S	<=	0.5	S	S	<=	0.5	S	neg	=	0.06	S	=	0.06	S	<=	1	S	<=	2	S	neg	neg
20156704	47	19to64	SAMN05222730	66	114641	262348	2045319	16F	neg	995	91	4	3	<=	0.03	S	S	<=	0.03	S	<=	0.06	S	<=	0.06	S	S	<=	0.5	S	S	<=	0.5	S	neg	=	0.06	S	=	0.06	S	<=	1	S	<=	2	S	neg	neg
20156732	ND	ND	SAMN05222731	22	219722	444084	2055302	33F	neg	100	2	0	6	<=	0.03	S	S	<=	0.03	S	<=	0.06	S	<=	0.06	S	S	<=	0.5	S	S	<=	0.5	S	MEF	=	8	R	=	0.06	S	<=	1	S	<=	2	S	neg	FOLP_189-ins
20156733	54	19to64	SAMN05222732	58	95731	224288	2118541	12F	neg	989	12	4	3	<=	0.03	S	S	<=	0.03	S	<=	0.06	S	<=	0.06	S	S	<=	0.5	S	S	<=	0.5	S	neg	=	0.06	S	=	0.06	S	<=	1	S	<=	2	S	neg	FOLA-I20L:FOLP_178-ins
20156734	75	>65	SAMN05222733	23	295792	433047	2035106	3	neg	10457	2	0	6	<=	0.03	S	S	<=	0.03	S	<=	0.06	S	<=	0.06	S	S	<=	0.5	S	S	<=	0.5	S	neg	=	0.06	S	=	0.06	S	<=	1	S	<=	2	S	neg	FOLP_189-ins
20156735	61	19to64	SAMN05222734	51	112535	276597	2066836	15B	neg	199	2	0	2	<=	0.03	S	S	<=	0.03	S	<=	0.06	S	<=	0.06	S	S	<=	0.5	S	S	<=	0.5	S	neg	=	0.06	S	=	0.06	S	<=	1	S	<=	2	S	neg	neg
20156736	72	>65	SAMN05222735	58	95119	203414	2069864	10A	neg	816	0	0	2	<=	0.03	S	S	<=	0.03	S	<=	0.06	S	<=	0.06	S	S	<=	0.5	S	S	<=	0.5	S	neg	=	0.06	S	=	0.06	S	<=	1	S	<=	2	S	neg	neg
20156737	89	>65	SAMN05222736	98	43539	128708	1977243	3	neg	180	2	0	NF	<=	0.03	S	S	<=	0.03	S	<=	0.06	S	<=	0.06	S	S	<=	0.03	S	S	<=	0.5	S	neg	=	0.06	S	=	0.06	S	<=	1	S	<=	2	S	neg	neg
20156738	19	19to64	SAMN05222737	51	119144	201117	2014082	4	neg	10172	1	0	0	<=	0.03	S	S	<=	0.03	S	<=	0.06	S	<=	0.06	S	S	<=	0.5	S	S	<=	0.5	S	neg	=	0.06	S	=	0.06	S	<=	1	S	<=	2	S	neg	FOLP_178-ins
20156739	71	>65	SAMN05222738	96	73972	131449	1973778	3	neg	180	2	0	2	<=	0.03	S	S	<=	0.03	S	<=	0.06	S	<=	0.06	S	S	<=	0.5	S	S	<=	0.5	S	neg	=	0.06	S	=	0.06	S	<=	1	S	<=	2	S	neg	neg
20156740	66	>65	SAMN05222739	54	119502	333090	2019238	11A	neg	62	2	6	10	<=	0.03	S	S	<=	0.03	S	<=	0.06	S	<=	0.06	S	S	<=	0.5	S	S	<=	0.5	S	neg	=	0.06	S	=	0.06	S	<=	1	S	<=	2	S	neg	neg
20156741	76	>65	SAMN05222740	101	63358	248360	2212260	6B	1	386	2	53	77	=	0.12	R	S	=	0.12	S	<=	0.06	S	<=	0.06	S	S	<=	0.5	S	S	<=	0.5	S	ERMB	>	32	R	>	2	R	<=	1	S	<=	2	S	pos	FOLP_176-ins
20156742	83	>65	SAMN05222741	473	29996	106531	1962405	3	neg	180	2	3	2	<=	0.03	S	S	<=	0.03	S	<=	0.06	S	<=	0.06	S	S	<=	0.5	S	S	<=	0.5	S	neg	=	0.06	S	=	0.06	S	<=	1	S	<=	2	S	neg	neg
20156743	73	>65	SAMN05222742	175	55030	172248	2053228	22F	neg	433	1	2	2	<=	0.03	S	S	<=	0.03	S	<=	0.06	S	<=	0.06	S	S	<=	0.5	S	S	<=	0.5	S	neg	=	0.06	S	=	0.06	S	<=	1	S	<=	2	S	neg	neg
20156744	52	19to64	SAMN05222743	77	63427	271930	2024920	12F	neg	218	0	0	0	<=	0.03	S	S	<=	0.03	S	<=	0.06	S	<=	0.06	S	S	<=	0.5	S	S	<=	0.5	S	MEF	=	8	R	=	0.06	S	<=	1	S	<=	2	S	neg	neg
20156745	35	19to64	SAMN05222744	85	41734	236366	2028284	12F	neg	218	0	0	0	<=	0.03	S	S	<=	0.03	S	<=	0.06	S	<=	0.06	S	S	<=	0.5	S	S	<=	0.5	S	MEF	=	8	R	=	0.06	S	<=	1	S	<=	2	S	neg	neg
20156746	67	>65	SAMN05222745	52	87017	315550	2078600	22F	neg	433	1	2	2	<=	0.03	S	S	<=	0.03	S	<=	0.06	S	<=	0.06	S	S	<=	0.5	S	S	<=	0.5	S	neg	=	0.06	S	=	0.06	S	<=	1	S	<=	2	S	neg	neg
20156747	41	19to64	SAMN05222746	80	61803	166839	2018570	31	neg	8289	12	0	0	<=	0.03	S	S	<=	0.03	S	<=	0.06	S	<=	0.06	S	S	<=	0.5	S	S	<=	0.5	S	neg	=	0.06	S	=	0.06	S	<=	1	S	<=	2	S	neg	neg
20156748	58	19to64	SAMN05222747	80	86842	203040	2104208	7C	neg	1797	2	4	6	<=	0.03	S	S	<=	0.03	S	<=	0.06	S	<=	0.06	S	S	<=	0.5	S	S	<=	0.5	S	neg	=	0.06	S	=	0.06	S	<=	1	S	<=	2	S	neg	neg
20156749	51	19to64	SAMN05222748	55	93322	204015	2014638	4	neg	10172	1	0	0	<=	0.03	S	S	<=	0.03	S	<=	0.06	S	<=	0.06	S	S	<=	0.5	S	S	<=	0.5	S	neg	=	0.06	S	=	0.06	S	<=	1	S	<=	2	S	neg	FOLP_178-ins
20156750	90	>65	SAMN05222749	50	168310	262102	1976093	3	neg	180	2	0	2	<=	0.03	S	S	<=	0.03	S	<=	0.06	S	<=	0.06	S	S	<=	0.5	S	S	<=	0.5	S	neg	=	0.06	S	=	0.06	S	<=	1	S	<=	2	S	neg	neg
20156751	46	19to64	SAMN05222750	47	133045	231416	1995248	8	neg	1480	3	5	5	<=	0.03	S	S	<=	0.03	S	<=	0.06	S	<=	0.06	S	S	<=	0.5	S	S	<=	0.5	S	neg	=	0.06	S	=	0.06	S	<=	1	S	<=	2	S	neg	neg
20156752	46	19to64	SAMN05222751	68	74067	190058	2068739	23B	neg	433	12	2	2	<=	0.03	S	S	<=	0.03	S	<=	0.06	S	<=	0.06	S	S	<=	0.5	S	S	<=	0.5	S	neg	=	0.06	S	=	0.06	S	<=	1	S	<=	2	S	neg	neg
20156753	41	19to64	SAMN05222752	64	63660	184179	2009446	31	neg	568	12	0	0	<=	0.03	S	S	<=	0.03	S	<=	0.06	S	<=	0.06	S	S	<=	0.5	S	S	<=	0.5	S	neg	=	0.06	S	=	0.06	S	<=	1	S	<=	2	S	neg	neg
20156754	91	>65	SAMN05222753	57	121564	283037	2053429	6C	neg	1390	2	16	40	=	0.25	R	S	=	0.25	S	=	0.12	S	=	0.25	S	S	<=	0.5	S	S	<=	0.5	S	neg	=	0.06	S	=	0.06	S	<=	1	S	<=	2	S	neg	neg
20156755	61	19to64	SAMN05222754	63	93486	383418	2020537	12F	neg	218	0	0	0	<=	0.03	S	S	<=	0.03	S	<=	0.06	S	<=	0.06	S	S	<=	0.5	S	S	<=	0.5	S	MEF	=	8	R	=	0.06	S	<=	1	S	<=	2	S	neg	neg
20156756	72	>65	SAMN05222755	37	187042	239668	2117633	16F	neg	10148	0	10	14	=	0.06	S	S	<=	0.03	S	<=	0.06	S	=	0.12	S	S	<=	0.5	S	S	<=	0.5	S	neg	=	0.06	S	=	0.06	S	<=	1	S	<=	2	S	neg	neg
20156757	54	19to64	SAMN05222756	56	83097	336108	2074758	19A	neg	1673	0	29	11	=	0.12	R	S	=	0.12	S	<=	0.06	S	<=	0.06	S	S	<=	0.5	S	S	<=	0.5	S	neg	=	0.06	S	=	0.06	S	<=	1	S	<=	2	S	neg	neg
20156759	60	19to64	SAMN05222758	44	99057	247211	2048278	9N	neg	66	1	0	0	<=	0.03	S	S	<=	0.03	S	<=	0.06	S	<=	0.06	S	S	<=	0.5	S	S	<=	0.5	S	neg	=	0.06	S	=	0.06	S	<=	1	S	<=	2	S	neg	neg
20156760	53	19to64	SAMN05222759	54	113857	250209	2077770	15A	neg	63	24	27	28	=	0.25	R	S	<=	0.03	S	<=	0.06	S	=	0.12	S	S	<=	0.5	S	S	<=	0.5	S	ERMB	>	32	R	>	2	R	<=	1	S	<=	2	S	pos	FOLP_178-ins
20156761	92	>65	SAMN05222760	42	420236	600862	1988440	3	neg	180	2	3	2	<=	0.03	S	S	<=	0.03	S	<=	0.06	S	<=	0.06	S	S	<=	0.5	S	S	<=	0.5	S	neg	=	0.06	S	=	0.06	S	<=	1	S	<=	2	S	neg	neg
20156762	63	19to64	SAMN05222761	63	86663	221568	2029483	12F	neg	218	0	0	0	<=	0.03	S	S	<=	0.03	S	<=	0.06	S	<=	0.06	S	S	<=	0.5	S	S	<=	0.5	S	MEF	=	8	R	=	0.06	S	<=	1	S	<=	2	S	neg	neg
20156763	47	19to64	SAMN05222762	27	197350	469151	1990217	8	neg	1480	3	2	5	<=	0.03	S	S	<=	0.03	S	<=	0.06	S	<=	0.06	S	S	<=	0.5	S	S	<=	0.5	S	neg	=	0.06	S	=	0.06	S	<=	1	S	<=	2	S	neg	neg
20156764	59	19to64	SAMN05222763	66	85805	383425	2022823	12F	neg	218	0	0	0	<=	0.03	S	S	<=	0.03	S	<=	0.06	S	<=	0.06	S	S	<=	0.5	S	S	<=	0.5	S	MEF	=	8	R	=	0.06	S	<=	1	S	<=	2	S	neg	neg
20156765	64	19to64	SAMN05222764	62	93952	275840	2028590	12F	neg	218	0	0	0	<=	0.03	S	S	<=	0.03	S	<=	0.06	S	<=	0.06	S	S	<=	0.5	S	S	<=	0.5	S	MEF	=	8	R	=	0.06	S	<=	1	S	<=	2	S	neg	neg
20156766	20	19to64	SAMN05222765	38	152501	207336	1980462	12F	neg	220	0	0	2	<=	0.03	S	S	<=	0.03	S	<=	0.06	S	<=	0.06	S	S	<=	0.5	S	S	<=	0.5	S	neg	=	0.06	S	=	0.06	S	<=	1	S	<=	2	S	neg	neg
20156767	3	0-4	SAMN05222766	60	77814	188605	2070599	22F	neg	433	1	2	2	<=	0.03	S	S	<=	0.03	S	<=	0.06	S	<=	0.06	S	S	<=	0.5	S	S	<=	0.5	S	neg	=	0.06	S	=	0.06	S	<=	1	S	<=	2	S	neg	neg
20156768	66	>65	SAMN05222767	83	47856	117079	2028867	12F	neg	218	0	0	0	<=	0.03	S	S	<=	0.03	S	<=	0.06	S	<=	0.06	S	S	<=	0.5	S	S	<=	0.5	S	MEF	=	8	R	=	0.06	S	<=	1	S	<=	2	S	neg	neg
20156769	53	19to64	SAMN05222768	46	84078	356845	2040839	9N	neg	66	1	0	0	<=	0.03	S	S	<=	0.03	S	<=	0.06	S	<=	0.06	S	S	<=	0.5	S	S	<=	0.5	S	neg	=	0.06	S	=	0.06	S	<=	1	S	<=	2	S	neg	neg
20156770	34	19to64	SAMN05222769	43	131656	399233	2090185	9N	neg	66	1	0	0	<=	0.03	S	S	<=	0.03	S	<=	0.06	S	<=	0.06	S	S	<=	0.5	S	S	<=	0.5	S	neg	=	0.06	S	=	0.06	S	<=	1	S	<=	2	S	neg	neg
20156771	63	19to64	SAMN05222770	54	106916	358828	2056681	20	neg	235	1	4	2	<=	0.03	S	S	<=	0.03	S	<=	0.06	S	<=	0.06	S	S	<=	0.5	S	S	<=	0.5	S	neg	=	0.06	S	=	0.06	S	<=	1	S	<=	2	S	neg	neg
20156772	91	>65	SAMN05222771	40	94140	191178	2005615	11A	neg	62	2	6	10	<=	0.03	S	S	<=	0.03	S	<=	0.06	S	<=	0.06	S	S	<=	0.5	S	S	<=	0.5	S	neg	=	0.06	S	=	0.06	S	<=	1	S	<=	2	S	neg	neg
20156773	37	19to64	SAMN05222772	26	147295	297016	2055307	33F	neg	100	2	0	6	<=	0.03	S	S	<=	0.03	S	<=	0.06	S	<=	0.06	S	S	<=	0.5	S	S	<=	0.5	S	MEF	=	8	R	=	0.06	S	<=	1	S	<=	2	S	neg	FOLP_189-ins
20156774	79	>65	SAMN05222773	38	144360	216415	2045153	3	neg	180	2	0	111	=	0.06	S	S	=	0.06	S	<=	0.06	S	=	0.25	S	S	<=	0.5	S	S	=	1	I	ERMB	>	32	R	>	2	R	<=	1	S	<=	2	S	pos	neg
20156775	57	19to64	SAMN05222774	58	85837	383436	2027173	12F	neg	218	0	0	0	<=	0.03	S	S	<=	0.03	S	<=	0.06	S	<=	0.06	S	S	<=	0.5	S	S	<=	0.5	S	MEF	=	8	R	=	0.06	S	<=	1	S	<=	2	S	neg	neg
20156776	53	19to64	SAMN05222775	101	38947	125952	2029652	12F	neg	218	0	0	0	<=	0.03	S	S	<=	0.03	S	<=	0.06	S	<=	0.06	S	S	<=	0.5	S	S	<=	0.5	S	MEF	=	8	R	=	0.06	S	<=	1	S	<=	2	S	neg	neg
20156777	49	19to64	SAMN05222776	67	78836	157141	2054245	20	neg	235	1	4	2	<=	0.03	S	S	<=	0.03	S	<=	0.06	S	<=	0.06	S	S	<=	0.5	S	S	<=	0.5	S	neg	=	0.06	S	=	0.06	S	<=	1	S	<=	2	S	neg	neg
20156928	9	5to18	SAMN09218796	108	54164	175992	2116997	21	neg	3689	2	0	2	<=	0.03	S	S	<=	0.03	S	<=	0.06	S	<=	0.06	S	S	<=	0.5	S	S	<=	0.5	S	neg	=	0.06	S	=	0.06	S	<=	1	S	<=	2	S	neg	neg
20156929	32	19to64	SAMN09224082	64	85520	197612	2125234	12F	neg	989	12	4	3	<=	0.03	S	S	<=	0.03	S	<=	0.06	S	<=	0.06	S	S	<=	0.5	S	S	<=	0.5	S	neg	=	0.06	S	=	0.06	S	<=	1	S	<=	2	S	neg	FOLP_178-ins
20156930	62	19to64	SAMN09224786	84	53885	158794	2120471	22F	neg	433	1	2	59	<=	0.03	S	S	<=	0.03	S	<=	0.06	S	<=	0.06	S	S	<=	0.5	S	S	<=	0.5	S	MEF	=	8	R	=	0.06	S	<=	1	S	<=	2	S	neg	neg
20156931	66	>65	SAMN09224746	83	63026	181965	2049122	11A	neg	1367	2	0	2	<=	0.03	S	S	<=	0.03	S	<=	0.06	S	<=	0.06	S	S	<=	0.5	S	S	<=	0.5	S	neg	=	0.06	S	=	0.06	S	<=	1	S	<=	2	S	neg	FOLA-Q1Y,I20L:FOLP_178-ins
20156932	63	19to64	SAMN09230577	27	146003	340184	2067797	33F	neg	2705	2	0	6	<=	0.03	S	S	<=	0.03	S	<=	0.06	S	<=	0.06	S	S	<=	0.5	S	S	<=	0.5	S	MEF	=	8	R	=	0.06	S	<=	1	S	<=	2	S	neg	FOLP_189-ins
20156933	74	>65	SAMN05596829	42	82818	157738	1996833	35B	1	558	4	7	7	=	2	R	S	=	4	I	=	0.5	I	=	1	I	S	=	1	I	S	>	2	R	MEF	=	8	R	=	0.06	S	<=	1	S	<=	2	S	neg	neg
20156934	0	0-4	SAMN09230544	24	230305	575827	2053609	33F	neg	100	2	0	6	<=	0.03	S	S	<=	0.03	S	<=	0.06	S	<=	0.06	S	S	<=	0.5	S	S	<=	0.5	S	MEF	=	8	R	=	0.06	S	<=	1	S	<=	2	S	neg	FOLP_189-ins
20156935	67	>65	SAMN09224470	75	72392	210741	2152782	6C	1	1092	6	7	8	=	0.5	R	S	=	1	S	=	0.25	S	=	0.5	S	S	<=	0.5	S	S	=	2	R	neg	=	0.06	S	=	0.06	S	<=	1	S	<=	2	S	neg	FOLA-Q1H,V3I,E14D,I20L:FOLP_195-ins
20156936	77	>65	SAMN05596830	54	79319	221024	2050999	35B	1	558	4	7	7	=	2	R	S	=	4	I	=	0.5	I	=	1	I	S	=	1	I	S	>	2	R	neg	=	0.06	S	=	0.06	S	<=	1	S	<=	2	S	neg	neg
20156937	76	>65	SAMN09224045	63	71522	203805	2031444	31	neg	1111	12	0	0	<=	0.03	S	S	<=	0.03	S	<=	0.06	S	<=	0.06	S	S	<=	0.5	S	S	<=	0.5	S	MEF	=	8	R	=	0.06	S	<=	1	S	<=	2	S	neg	neg
20156938	46	19to64	SAMN09230786	39	167499	360469	1989254	3	neg	180	2	3	2	<=	0.03	S	S	<=	0.03	S	<=	0.06	S	<=	0.06	S	S	<=	0.5	S	S	<=	0.5	S	neg	=	0.06	S	=	0.06	S	<=	1	S	<=	2	S	neg	neg
20156939	48	19to64	SAMN09224471	75	77649	199430	2143567	10A	neg	816	0	0	2	<=	0.03	S	S	<=	0.03	S	<=	0.06	S	<=	0.06	S	S	<=	0.5	S	S	<=	0.5	S	neg	=	0.06	S	=	0.06	S	<=	1	S	<=	2	S	neg	neg
20156940	90	>65	SAMN05596831	54	69871	210465	2129216	35B	1	156	4	12	7	=	2	R	S	=	4	I	=	0.5	I	=	1	I	S	=	1	I	S	>	2	R	MEF	=	8	R	=	0.06	S	<=	1	S	<=	2	S	neg	FOLA-I20L:FOLP_178-ins
20156941	41	19to64	SAMN09231459	57	86970	254070	2049506	22F	neg	10163	1	2	2	<=	0.03	S	S	<=	0.03	S	<=	0.06	S	<=	0.06	S	S	<=	0.5	S	S	<=	0.5	S	MEF	=	8	R	=	0.06	S	<=	1	S	<=	2	S	neg	neg
20156942	84	>65	SAMN09223927	60	85180	287302	2068236	22F	neg	433	1	2	2	<=	0.03	S	S	<=	0.03	S	<=	0.06	S	<=	0.06	S	S	<=	0.5	S	S	<=	0.5	S	neg	=	0.06	S	=	0.06	S	<=	1	S	<=	2	S	neg	neg
20156943	64	19to64	SAMN09230578	27	364342	431169	1988708	3	neg	180	2	3	2	<=	0.03	S	S	<=	0.03	S	<=	0.06	S	<=	0.06	S	S	<=	0.5	S	S	<=	0.5	S	neg	=	0.06	S	=	0.06	S	<=	1	S	<=	2	S	neg	neg
20156944	52	19to64	SAMN09231419	56	185052	359038	1991758	8	neg	1268	3	5	5	<=	0.03	S	S	<=	0.03	S	<=	0.06	S	<=	0.06	S	S	<=	0.5	S	S	<=	0.5	S	neg	=	0.06	S	=	0.06	S	<=	1	S	<=	2	S	neg	neg
20156945	41	19to64	SAMN09218916	117	71714	165227	2011212	7F	2	191	2	0	2	<=	0.03	S	S	<=	0.03	S	<=	0.06	S	<=	0.06	S	S	<=	0.5	S	S	<=	0.5	S	neg	=	0.06	S	=	0.06	S	<=	1	S	<=	2	S	neg	neg
20156946	78	>65	SAMN09230621	31	163421	333465	2068750	33F	neg	2705	2	0	6	<=	0.03	S	S	<=	0.03	S	<=	0.06	S	<=	0.06	S	S	<=	0.5	S	S	<=	0.5	S	MEF	=	8	R	=	0.06	S	<=	1	S	<=	2	S	neg	FOLP_189-ins
20156947	88	>65	SAMN09223880	59	83991	198842	2085302	19F	1	177	23	0	139	<=	0.03	S	S	<=	0.03	S	<=	0.06	S	<=	0.06	S	S	<=	0.5	S	S	<=	0.5	S	neg	=	0.06	S	=	0.06	S	<=	1	S	<=	2	S	neg	FOLA-Q1H,V3I,E14D,I20L:FOLP_177-ins:FOLP_180-ins
20156948	36	19to64	SAMN09224199	67	66285	171355	2060472	23B	neg	1448	12	0	0	<=	0.03	S	S	<=	0.03	S	<=	0.06	S	<=	0.06	S	S	<=	0.5	S	S	<=	0.5	S	neg	=	0.06	S	=	0.06	S	<=	1	S	<=	2	S	neg	neg
20156949	68	>65	SAMN09230695	35	167572	308382	1988721	3	neg	180	2	3	2	<=	0.03	S	S	<=	0.03	S	<=	0.06	S	<=	0.06	S	S	<=	0.5	S	S	<=	0.5	S	neg	=	0.06	S	=	0.06	S	<=	1	S	<=	2	S	neg	neg
20156950	58	19to64	SAMN09224272	69	64950	199938	2137655	16F	neg	1840	0	10	14	=	0.06	S	S	<=	0.03	S	<=	0.06	S	=	0.12	S	S	<=	0.5	S	S	<=	0.5	S	neg	=	0.06	S	=	0.06	S	<=	1	S	<=	2	S	neg	neg
20156951	98	>65	SAMN09224513	76	97681	321146	2071110	6D	neg	1379	19	31	8	=	1	R	S	=	1	S	=	0.12	S	=	0.25	S	S	<=	0.5	S	S	=	2	R	MEF:R23S1-A21G	>	32	R	=	1	R	<=	1	S	<=	2	S	pos	FOLA-Q1H,I20L:FOLP_173-ins
20156952	87	>65	SAMN09231000	46	117396	346257	2053604	16F	neg	995	91	4	3	<=	0.03	S	S	<=	0.03	S	<=	0.06	S	<=	0.06	S	S	<=	0.5	S	S	<=	0.5	S	neg	=	0.06	S	=	0.06	S	<=	1	S	<=	2	S	neg	neg
20156953	51	19to64	SAMN09230696	35	147887	371439	2017391	8	neg	4216	50	0	0	<=	0.03	S	S	<=	0.03	S	<=	0.06	S	<=	0.06	S	S	<=	0.5	S	S	<=	0.5	S	neg	=	0.06	S	=	0.06	S	<=	1	S	<=	2	S	neg	neg
20156954	93	>65	SAMN09230607	30	301952	389928	1988397	3	neg	180	2	3	2	<=	0.03	S	S	<=	0.03	S	<=	0.06	S	<=	0.06	S	S	<=	0.5	S	S	<=	0.5	S	neg	=	0.06	S	=	0.06	S	<=	1	S	<=	2	S	neg	neg
20160094	83	>65	SAMN05222777	69	68686	211789	2044527	19A	1:2	320	13	11	127	=	2	R	S	=	2	S	=	1	R	=	0.5	S	S	<=	0.5	S	S	=	2	R	ERMB:MEF	>	32	R	>	2	R	<=	1	S	<=	2	S	pos	FOLA-Q1Y,Q11H,E14D,I20L:FOLP_195-ins
20160095	54	19to64	SAMN05222778	42	97640	256061	1996308	8	neg	1480	3	5	5	<=	0.03	S	S	<=	0.03	S	<=	0.06	S	<=	0.06	S	S	<=	0.5	S	S	<=	0.5	S	neg	=	0.06	S	=	0.06	S	<=	1	S	<=	2	S	neg	neg
20160096	25	19to64	SAMN05222779	57	75859	152983	1983992	12F	neg	220	0	0	2	<=	0.03	S	S	<=	0.03	S	<=	0.06	S	<=	0.06	S	S	<=	0.5	S	S	<=	0.5	S	neg	=	0.06	S	=	0.06	S	<=	1	S	<=	2	S	neg	neg
20160097	85	>65	SAMN05222780	51	101615	296665	2054355	22F	neg	10163	1	2	2	<=	0.03	S	S	<=	0.03	S	<=	0.06	S	<=	0.06	S	S	<=	0.5	S	S	<=	0.5	S	MEF	=	8	R	=	0.06	S	<=	1	S	<=	2	S	neg	neg
20160098	86	>65	SAMN05222781	102	50045	184814	2133683	38	neg	393	2	4	0	<=	0.03	S	S	<=	0.03	S	<=	0.06	S	<=	0.06	S	S	<=	0.5	S	S	<=	0.5	S	neg	=	0.06	S	=	0.06	S	<=	1	S	<=	2	S	neg	neg
20160099	56	19to64	SAMN05222782	35	216402	297515	1975996	3	neg	180	2	108	2	<=	0.03	S	S	<=	0.03	S	<=	0.06	S	<=	0.06	S	S	<=	0.5	S	S	<=	0.5	S	neg	=	0.06	S	=	0.06	S	<=	1	S	<=	2	S	neg	neg
20160100	50	19to64	SAMN05222783	55	80913	302433	2106382	23A	neg	338	0	1	1	=	0.25	R	S	=	0.06	S	<=	0.06	S	=	0.12	S	S	<=	0.5	S	S	<=	0.5	S	neg	=	0.06	S	=	0.06	S	<=	1	S	<=	2	S	neg	neg
20160102	27	19to64	SAMN05222784	30	150718	469588	1993699	8	neg	1480	3	5	5	<=	0.03	S	S	<=	0.03	S	<=	0.06	S	<=	0.06	S	S	<=	0.5	S	S	<=	0.5	S	neg	=	0.06	S	=	0.06	S	<=	1	S	<=	2	S	neg	neg
20160104	3	0-4	SAMN05222785	63	67010	278943	2063589	19A	1:2	320	13	11	16	=	4	R	I	=	8	R	=	1	R	=	2	R	I	=	2	R	I	>	2	R	ERMB:MEF	>	32	R	>	2	R	<=	1	S	<=	2	S	pos	FOLA-Q1Y,Q11H,E14D,I20L:FOLP_195-ins
20160105	50	19to64	SAMN05222786	62	84479	279375	2100758	15A	1	3811	1	0	175	<=	0.03	S	S	<=	0.03	S	<=	0.06	S	<=	0.06	S	S	<=	0.5	S	S	<=	0.5	S	neg	=	0.06	S	=	0.06	S	<=	1	S	<=	2	S	neg	neg
20160106	80	>65	SAMN05222787	34	237984	661651	2024351	3	neg	180	2	3	2	<=	0.03	S	S	<=	0.03	S	<=	0.06	S	<=	0.06	S	S	<=	0.5	S	S	<=	0.5	S	neg	=	0.06	S	=	0.06	S	<=	1	S	<=	2	S	neg	neg
20160107	70	>65	SAMN05222788	58	76719	257984	2103484	23A	neg	338	0	1	1	=	0.25	R	S	=	0.06	S	<=	0.06	S	=	0.12	S	S	<=	0.5	S	S	<=	0.5	S	MEF	=	8	R	=	0.06	S	<=	1	S	<=	2	S	neg	neg
20160108	67	>65	SAMN05222789	74	77613	175575	2105353	10A	neg	816	0	0	2	<=	0.03	S	S	<=	0.03	S	<=	0.06	S	<=	0.06	S	S	<=	0.5	S	S	<=	0.5	S	neg	=	0.06	S	=	0.06	S	<=	1	S	<=	2	S	neg	neg
20160109	63	19to64	SAMN05222790	61	68655	305279	2044425	19A	1:2	320	13	11	16	=	4	R	I	=	8	R	=	1	R	=	2	R	I	=	2	R	I	>	2	R	ERMB:MEF	>	32	R	>	2	R	<=	1	S	<=	2	S	pos	FOLA-Q1Y,Q11H,E14D,I20L:FOLP_195-ins
20160110	72	>65	SAMN05222791	77	115256	212023	2041479	3	neg	180	2	0	2	<=	0.03	S	S	<=	0.03	S	<=	0.06	S	<=	0.06	S	S	<=	0.5	S	S	<=	0.5	S	ERMB:ERMBS:ERMBUP	=	0.06	S	=	0.06	S	<=	1	S	<=	2	S	neg	neg
20160111	25	19to64	SAMN05222792	209	19454	63368	2120374	13	1	574	11	0	0	<=	0.03	S	S	<=	0.03	S	<=	0.06	S	<=	0.06	S	S	<=	0.5	S	S	<=	0.5	S	neg	=	0.06	S	=	0.06	S	<=	1	S	<=	2	S	neg	neg
20160112	3	0-4	SAMN05222793	46	96065	262049	2065271	35F	neg	498	0	0	3	<=	0.03	S	S	<=	0.03	S	<=	0.06	S	<=	0.06	S	S	<=	0.5	S	S	<=	0.5	S	neg	=	0.06	S	=	0.06	S	<=	1	S	<=	2	S	neg	neg
20160113	35	19to64	SAMN05222794	122	42045	124677	2021186	31	neg	3548	12	0	0	<=	0.03	S	S	<=	0.03	S	<=	0.06	S	<=	0.06	S	S	<=	0.5	S	S	<=	0.5	S	neg	=	0.06	S	=	0.06	S	<=	1	S	<=	2	S	neg	neg
20160114	30	19to64	SAMN05222795	123	35350	82457	2124476	7C	neg	11591	2	0	0	<=	0.03	S	S	<=	0.03	S	<=	0.06	S	<=	0.06	S	S	<=	0.5	S	S	<=	0.5	S	neg	=	0.06	S	=	0.06	S	<=	1	S	<=	2	S	neg	neg
20160115	49	19to64	SAMN05222796	57	128878	251178	2117589	6C	neg	1292	19	31	8	=	1	R	S	=	1	S	=	0.12	S	=	0.25	S	S	<=	0.5	S	S	=	2	R	MEF	=	8	R	=	0.06	S	<=	1	S	<=	2	S	neg	FOLA-Q1H,I20L:FOLP_173-ins
20160116	74	>65	SAMN05222797	85	54792	121449	1986704	7F	2	191	2	0	2	<=	0.03	S	S	<=	0.03	S	<=	0.06	S	<=	0.06	S	S	<=	0.5	S	S	<=	0.5	S	neg	=	0.06	S	=	0.06	S	<=	1	S	<=	2	S	neg	neg
20160117	33	19to64	SAMN05222798	45	95173	232240	1980607	12F	neg	220	0	0	2	<=	0.03	S	S	<=	0.03	S	<=	0.06	S	<=	0.06	S	S	<=	0.5	S	S	<=	0.5	S	neg	=	0.06	S	=	0.06	S	<=	1	S	<=	2	S	neg	neg
20160118	67	>65	SAMN05222799	95	48119	173264	2073676	3	neg	180	2	3	2	<=	0.03	S	S	<=	0.03	S	<=	0.06	S	<=	0.06	S	S	<=	0.5	S	S	<=	0.5	S	neg	=	0.06	S	=	0.06	S	<=	1	S	<=	2	S	neg	neg
20160119	82	>65	SAMN05222800	66	70036	135371	2133234	35B	1	156	4	12	7	=	2	R	S	=	4	I	=	0.5	I	=	1	I	S	=	1	I	S	>	2	R	MEF	=	8	R	=	0.06	S	<=	1	S	<=	2	S	neg	FOLA-I20L:FOLP_178-ins
20160120	0	0-4	SAMN05222801	30	141685	505123	2017753	33F	neg	100	2	0	6	<=	0.03	S	S	<=	0.03	S	<=	0.06	S	<=	0.06	S	S	<=	0.5	S	S	<=	0.5	S	neg	=	0.06	S	=	0.06	S	<=	1	S	<=	2	S	neg	FOLP_189-ins
20160121	78	>65	SAMN05222802	58	65420	191297	2035123	3	2	62	2	6	0	<=	0.03	S	S	<=	0.03	S	<=	0.06	S	<=	0.06	S	S	<=	0.5	S	S	<=	0.5	S	neg	=	0.06	S	=	0.06	S	<=	1	S	<=	2	S	neg	neg
20160123	54	19to64	SAMN05222804	48	171143	261676	2043436	3	neg	180	2	0	2	<=	0.03	S	S	<=	0.03	S	<=	0.06	S	<=	0.06	S	S	<=	0.5	S	S	<=	0.5	S	ERMB:ERMBS:ERMBUP	=	0.06	S	=	0.06	S	<=	1	S	<=	2	S	neg	neg
20160124	66	>65	SAMN05222805	63	69168	160425	2060071	6C	neg	11566	15	16	8	=	1	R	S	=	1	S	=	0.5	I	=	0.5	S	S	<=	0.5	S	S	>	2	R	MEF	=	8	R	=	0.06	S	<=	1	S	<=	2	S	neg	neg
20160125	58	19to64	SAMN05222806	77	57433	104401	2080305	6C	neg	8446	0	0	124	<=	0.03	S	S	<=	0.03	S	<=	0.06	S	<=	0.06	S	S	<=	0.5	S	S	<=	0.5	S	neg	=	0.06	S	=	0.06	S	<=	1	S	<=	2	S	neg	neg
20160126	5	5to18	SAMN05222807	51	119421	354595	2042617	19A	1:2	320	13	11	16	=	4	R	I	=	8	R	=	1	R	=	2	R	I	=	2	R	I	>	2	R	ERMB:MEF	>	32	R	>	2	R	<=	1	S	<=	2	S	pos	FOLA-Q1Y,Q11H,E14D,I20L:FOLP_195-ins
20160127	55	19to64	SAMN05222808	53	82836	256103	2035555	22F	neg	433	1	2	2	<=	0.03	S	S	<=	0.03	S	<=	0.06	S	<=	0.06	S	S	<=	0.5	S	S	<=	0.5	S	neg	=	0.06	S	=	0.06	S	<=	1	S	<=	2	S	neg	neg
20160128	53	19to64	SAMN05222809	99	46136	192001	2112097	34	neg	547	0	107	2	<=	0.03	S	S	<=	0.03	S	<=	0.06	S	<=	0.06	S	S	<=	0.5	S	S	<=	0.5	S	neg	=	0.06	S	=	0.06	S	<=	1	S	<=	2	S	neg	neg
20160129	61	19to64	SAMN05222810	71	111559	331291	2113935	6C	neg	1292	19	31	8	=	1	R	S	=	1	S	=	0.12	S	=	0.25	S	S	<=	0.5	S	S	=	2	R	MEF	=	8	R	=	0.06	S	<=	1	S	<=	2	S	neg	FOLA-Q1H,I20L:FOLP_173-ins
20160130	65	>65	SAMN05222811	90	41917	158280	2089514	17F	neg	392	11	0	0	<=	0.03	S	S	<=	0.03	S	<=	0.06	S	<=	0.06	S	S	<=	0.5	S	S	<=	0.5	S	neg	=	0.06	S	=	0.06	S	<=	1	S	<=	2	S	neg	neg
20160131	76	>65	SAMN05222812	125	39552	157436	2119891	19F	2	654	2	0	0	<=	0.03	S	S	<=	0.03	S	<=	0.06	S	<=	0.06	S	S	<=	0.5	S	S	<=	0.5	S	neg	=	0.06	S	=	0.06	S	<=	1	S	<=	2	S	neg	neg
20160132	63	19to64	SAMN05222813	55	76230	319234	2118713	23A	neg	10458	19	1	24	=	0.5	R	S	=	0.25	S	<=	0.06	S	=	0.25	S	S	<=	0.5	S	S	<=	0.5	S	ERMB	>	32	R	>	2	R	<=	1	S	<=	2	S	pos	neg
20160133	72	>65	SAMN05222814	61	59286	117492	2120894	23A	neg	338	19	1	24	=	0.5	R	S	=	0.25	S	<=	0.06	S	=	0.25	S	S	<=	0.5	S	S	<=	0.5	S	ERMB	>	32	R	>	2	R	<=	1	S	<=	2	S	pos	neg
20160234	55	19to64	SAMN05222815	66	80529	203981	2105139	23A	neg	338	0	1	1	=	0.25	R	S	=	0.06	S	<=	0.06	S	=	0.12	S	S	<=	0.5	S	S	<=	0.5	S	neg	=	0.06	S	=	0.06	S	<=	1	S	<=	2	S	neg	FOLA-I20L
20160235	44	19to64	SAMN05222816	70	59681	134743	2020955	12F	neg	11249	0	0	2	<=	0.03	S	S	<=	0.03	S	<=	0.06	S	<=	0.06	S	S	<=	0.5	S	S	<=	0.5	S	neg	=	0.06	S	=	0.06	S	<=	1	S	<=	2	S	neg	neg
20160236	66	>65	SAMN05222817	31	192304	322293	1973676	3	neg	180	2	0	2	<=	0.03	S	S	<=	0.03	S	<=	0.06	S	<=	0.06	S	S	<=	0.5	S	S	<=	0.5	S	neg	=	0.06	S	=	0.06	S	<=	1	S	<=	2	S	neg	neg
20160237	0	0-4	SAMN05222818	61	85609	333145	2056934	16F	neg	995	9	4	3	<=	0.03	S	S	<=	0.03	S	<=	0.06	S	<=	0.06	S	S	<=	0.5	S	S	<=	0.5	S	neg	=	0.06	S	=	0.06	S	<=	1	S	<=	2	S	neg	neg
20160238	58	19to64	SAMN05222819	129	46176	95942	2174882	7C	neg	11598	2	4	6	<=	0.03	S	S	<=	0.03	S	<=	0.06	S	<=	0.06	S	S	<=	0.5	S	S	<=	0.5	S	neg	=	0.06	S	=	0.06	S	<=	1	S	<=	2	S	neg	neg
20160239	48	19to64	SAMN05222820	124	39138	166189	2059043	11A	2	3276	2	6	0	<=	0.03	S	S	<=	0.03	S	<=	0.06	S	<=	0.06	S	S	<=	0.5	S	S	<=	0.5	S	MEF	=	8	R	=	0.06	S	<=	1	S	<=	2	S	neg	neg
20160240	76	>65	SAMN05222821	59	59494	304373	2124625	9N	neg	632	1	0	0	<=	0.03	S	S	<=	0.03	S	<=	0.06	S	<=	0.06	S	S	<=	0.5	S	S	<=	0.5	S	neg	=	0.06	S	=	0.06	S	<=	1	S	<=	2	S	neg	neg
20160241	58	19to64	SAMN05222822	75	74933	262937	2073833	10A	neg	816	0	0	2	<=	0.03	S	S	<=	0.03	S	<=	0.06	S	<=	0.06	S	S	<=	0.5	S	S	<=	0.5	S	neg	=	0.06	S	=	0.06	S	<=	1	S	<=	2	S	neg	neg
20160242	84	>65	SAMN05222823	32	195837	360754	1992047	3	neg	180	2	3	2	<=	0.03	S	S	<=	0.03	S	<=	0.06	S	<=	0.06	S	S	<=	0.5	S	S	<=	0.5	S	neg	=	0.06	S	=	0.06	S	<=	1	S	<=	2	S	neg	neg
20160243	52	19to64	SAMN05222824	61	63682	203378	2086538	19F	1	177	23	0	139	<=	0.03	S	S	<=	0.03	S	<=	0.06	S	<=	0.06	S	S	<=	0.5	S	S	<=	0.5	S	neg	=	0.06	S	=	0.06	S	<=	1	S	<=	2	S	neg	FOLP_177-ins
20160270	56	19to64	SAMN05222825	41	118619	196248	2021422	3	neg	180	2	3	2	<=	0.03	S	S	<=	0.03	S	<=	0.06	S	<=	0.06	S	S	<=	0.5	S	S	<=	0.5	S	R23S1-A21G	>	32	R	=	1	R	<=	1	S	<=	2	S	pos	neg
20160271	50	19to64	SAMN05222826	71	99628	325302	2086300	20	neg	1257	1	4	2	<=	0.03	S	S	<=	0.03	S	<=	0.06	S	<=	0.06	S	S	<=	0.5	S	S	<=	0.5	S	neg	=	0.06	S	=	0.06	S	<=	1	S	<=	2	S	neg	neg
20160272	69	>65	SAMN05222827	80	61815	164598	2115713	15A	neg	9939	24	27	28	=	0.25	R	S	<=	0.03	S	<=	0.06	S	=	0.12	S	S	<=	0.5	S	S	<=	0.5	S	ERMB	>	32	R	>	2	R	<=	1	S	<=	2	S	pos	FOLP_178-ins
20160273	71	>65	SAMN05222828	101	36830	91211	2028858	35B	1	558	4	7	7	=	2	R	S	=	4	I	=	0.5	I	=	1	I	S	=	1	I	S	>	2	R	MEF	=	8	R	=	0.06	S	<=	1	S	<=	2	S	neg	neg
20160274	50	19to64	SAMN05222829	93	59416	171576	2009663	7F	2	191	2	0	2	<=	0.03	S	S	<=	0.03	S	<=	0.06	S	<=	0.06	S	S	<=	0.5	S	S	<=	0.5	S	neg	=	0.06	S	=	0.06	S	<=	1	S	<=	2	S	neg	neg
20160275	63	19to64	SAMN05222830	89	64647	178217	2098949	15B	neg	1262	2	0	2	<=	0.03	S	S	<=	0.03	S	<=	0.06	S	<=	0.06	S	S	<=	0.5	S	S	<=	0.5	S	neg	=	0.06	S	=	0.06	S	<=	1	S	<=	2	S	neg	FOLP_176-ins
20160276	52	19to64	SAMN05222831	99	36542	102760	2058119	12F	neg	11595	0	0	0	<=	0.03	S	S	<=	0.03	S	<=	0.06	S	<=	0.06	S	S	<=	0.5	S	S	<=	0.5	S	MEF	=	8	R	=	0.06	S	<=	1	S	<=	2	S	neg	neg
20160277	64	19to64	SAMN05222832	39	96504	233597	2071611	23A	neg	338	19	1	24	=	0.5	R	S	=	0.25	S	<=	0.06	S	=	0.25	S	S	<=	0.5	S	S	<=	0.5	S	ERMB	>	32	R	>	2	R	<=	1	S	<=	2	S	pos	neg
20160278	41	19to64	SAMN05222833	73	55131	195194	2090613	9N	neg	1257	1	4	2	<=	0.03	S	S	<=	0.03	S	<=	0.06	S	<=	0.06	S	S	<=	0.5	S	S	<=	0.5	S	neg	=	0.06	S	=	0.06	S	<=	1	S	<=	2	S	neg	neg
20160279	61	19to64	SAMN05222834	59	98273	164227	2078760	16F	neg	10148	0	10	14	=	0.06	S	S	<=	0.03	S	<=	0.06	S	=	0.12	S	S	<=	0.5	S	S	<=	0.5	S	neg	=	0.06	S	=	0.06	S	<=	1	S	<=	2	S	neg	neg
20160280	85	>65	SAMN05222835	60	83969	214724	2056557	22F	neg	7314	1	2	2	<=	0.03	S	S	<=	0.03	S	<=	0.06	S	<=	0.06	S	S	<=	0.5	S	S	<=	0.5	S	MEF	=	8	R	=	0.06	S	<=	1	S	<=	2	S	neg	neg
20160281	45	19to64	SAMN05222836	59	90949	243774	2142347	23B	neg	1373	0	1	1	=	0.25	R	S	=	0.06	S	<=	0.06	S	=	0.12	S	S	<=	0.5	S	S	<=	0.5	S	neg	=	0.06	S	=	0.06	S	<=	1	S	<=	2	S	neg	FOLP_180-ins
20160282	61	19to64	SAMN05222837	75	59425	163242	2069774	22F	neg	433	1	2	2	<=	0.03	S	S	<=	0.03	S	<=	0.06	S	<=	0.06	S	S	<=	0.5	S	S	<=	0.5	S	neg	=	0.06	S	=	0.06	S	<=	1	S	<=	2	S	neg	neg
20160283	43	19to64	SAMN05222838	112	39091	108621	2077100	22F	neg	433	72	2	2	<=	0.03	S	S	<=	0.03	S	<=	0.06	S	<=	0.06	S	S	<=	0.5	S	S	<=	0.5	S	neg	=	0.06	S	=	0.06	S	<=	1	S	<=	2	S	neg	neg
20160285	82	>65	SAMN05222840	76	79949	195490	2071277	22F	neg	433	1	2	2	<=	0.03	S	S	<=	0.03	S	<=	0.06	S	<=	0.06	S	S	<=	0.5	S	S	<=	0.5	S	MEF	=	8	R	=	0.06	S	<=	1	S	<=	2	S	neg	neg
20160286	58	19to64	SAMN05222841	89	43153	92343	2088270	17F	neg	392	11	NF	0	<=	0.03	S	S	<=	0.03	S	<=	0.06	S	<=	0.06	S	S	<=	0.03	S	S	<=	0.5	S	neg	=	0.06	S	=	0.06	S	<=	1	S	<=	2	S	neg	neg
20160287	1	0-4	SAMN05222842	100	42239	99950	2162185	23A	neg	338	19	1	24	=	0.5	R	S	=	0.25	S	<=	0.06	S	=	0.25	S	S	<=	0.5	S	S	<=	0.5	S	ERMB	>	32	R	>	2	R	<=	1	S	<=	2	S	pos	neg
20160288	1	0-4	SAMN05222843	54	82962	190566	1981403	12F	neg	220	0	0	2	<=	0.03	S	S	<=	0.03	S	<=	0.06	S	<=	0.06	S	S	<=	0.5	S	S	<=	0.5	S	neg	=	0.06	S	=	0.06	S	<=	1	S	<=	2	S	neg	neg
20160289	59	19to64	SAMN05222844	97	52386	101490	2067394	9N	neg	66	1	0	110	=	0.06	S	S	<=	0.03	S	<=	0.06	S	<=	0.06	S	S	<=	0.5	S	S	<=	0.5	S	neg	=	0.06	S	=	0.06	S	<=	1	S	<=	2	S	neg	neg
20160290	69	>65	SAMN05222845	37	113954	259087	2074961	16F	neg	10439	92	4	2	<=	0.03	S	S	<=	0.03	S	<=	0.06	S	<=	0.06	S	S	<=	0.5	S	S	<=	0.5	S	neg	=	0.06	S	=	0.06	S	<=	1	S	<=	2	S	neg	neg
20160291	14	5to18	SAMN05222846	79	60766	188150	2097059	17F	neg	11580	11	109	0	=	0.06	S	S	=	0.06	S	<=	0.06	S	<=	0.06	S	S	<=	0.5	S	S	<=	0.5	S	neg	=	0.06	S	=	0.06	S	<=	1	S	<=	2	S	neg	FOLA-Q1Y,D12S,E14D,I20L:FOLP_169-ins
20160292	65	>65	SAMN05222847	85	78878	172879	2089741	7C	neg	1797	2	4	6	<=	0.03	S	S	<=	0.03	S	<=	0.06	S	<=	0.06	S	S	<=	0.5	S	S	<=	0.5	S	neg	=	0.06	S	=	0.06	S	<=	1	S	<=	2	S	neg	neg
20160293	34	19to64	SAMN05222848	89	57346	158598	2012393	7F	2	191	2	0	2	<=	0.03	S	S	<=	0.03	S	<=	0.06	S	<=	0.06	S	S	<=	0.5	S	S	<=	0.5	S	neg	=	0.06	S	=	0.06	S	<=	1	S	<=	2	S	neg	neg
20160294	85	>65	SAMN05222849	54	66877	183926	2019557	31	neg	568	12	0	0	<=	0.03	S	S	<=	0.03	S	<=	0.06	S	<=	0.06	S	S	<=	0.5	S	S	<=	0.5	S	neg	=	0.06	S	=	0.06	S	<=	1	S	<=	2	S	neg	neg
20160295	52	19to64	SAMN05222850	50	73132	208247	2020586	11A	2	62	2	6	0	<=	0.03	S	S	<=	0.03	S	<=	0.06	S	<=	0.06	S	S	<=	0.5	S	S	<=	0.5	S	neg	=	0.06	S	=	0.06	S	<=	1	S	<=	2	S	neg	neg
20160296	75	>65	SAMN05222851	73	53224	125387	2024921	31	neg	568	12	0	0	<=	0.03	S	S	<=	0.03	S	<=	0.06	S	<=	0.06	S	S	<=	0.5	S	S	<=	0.5	S	neg	=	0.06	S	=	0.06	S	<=	1	S	<=	2	S	neg	neg
20160297	78	>65	SAMN05222852	58	90339	305485	2126893	23A	neg	541	0	1	1	=	0.25	R	S	=	0.06	S	<=	0.06	S	=	0.12	S	S	<=	0.5	S	S	<=	0.5	S	neg	=	0.06	S	=	0.06	S	<=	1	S	<=	2	S	neg	neg
20160298	77	>65	SAMN05222853	55	72037	183756	2073637	16F	neg	10466	0	0	3	<=	0.03	S	S	<=	0.03	S	<=	0.06	S	<=	0.06	S	S	<=	0.5	S	S	<=	0.5	S	neg	=	0.06	S	=	0.06	S	<=	1	S	<=	2	S	neg	neg
20160299	50	19to64	SAMN05222854	56	96314	298530	2054651	22F	neg	7314	1	2	2	<=	0.03	S	S	<=	0.03	S	<=	0.06	S	<=	0.06	S	S	<=	0.5	S	S	<=	0.5	S	MEF	=	8	R	=	0.06	S	<=	1	S	<=	2	S	neg	neg
20160300	2	0-4	SAMN05222855	65	62169	333087	2065805	19A	1:2	320	13	11	26	=	4	R	I	=	8	R	=	1	R	=	4	R	R	=	4	R	R	>	2	R	ERMB:MEF	>	32	R	>	2	R	<=	1	S	<=	2	S	pos	FOLA-Q1Y,Q11H,E14D,I20L:FOLP_195-ins
20160302	4	0-4	SAMN05222857	56	126285	285925	2151250	23B	neg	11589	0	1	1	=	0.25	R	S	=	0.06	S	<=	0.06	S	=	0.12	S	S	<=	0.5	S	S	<=	0.5	S	neg	=	0.06	S	=	0.06	S	<=	1	S	<=	2	S	neg	FOLP_180-ins
20160303	85	>65	SAMN05222858	375	31217	92502	2024198	3	neg	180	2	0	2	<=	0.03	S	S	<=	0.03	S	<=	0.06	S	<=	0.06	S	S	<=	0.5	S	S	<=	0.5	S	ERMB:ERMBS:ERMBUP	=	0.06	S	=	0.06	S	<=	1	S	<=	2	S	neg	neg
20160304	45	19to64	SAMN05222859	47	97822	399172	2119055	34	neg	547	0	0	2	<=	0.03	S	S	<=	0.03	S	<=	0.06	S	<=	0.06	S	S	<=	0.5	S	S	<=	0.5	S	neg	=	0.06	S	=	0.06	S	<=	1	S	<=	2	S	neg	neg
20160305	30	19to64	SAMN05222860	78	67140	278277	2111817	19A	neg	1673	0	29	11	=	0.12	R	S	=	0.12	S	<=	0.06	S	<=	0.06	S	S	<=	0.5	S	S	<=	0.5	S	neg	=	0.06	S	=	0.06	S	<=	1	S	<=	2	S	neg	neg
20160306	3	0-4	SAMN05222861	192	53171	129389	2131119	23B	neg	1373	0	1	1	=	0.25	R	S	=	0.06	S	<=	0.06	S	=	0.12	S	S	<=	0.5	S	S	<=	0.5	S	neg	=	0.06	S	=	0.06	S	<=	1	S	<=	2	S	neg	FOLP_180-ins
20160307	5	5to18	SAMN05222862	47	80835	186460	1981479	12F	neg	220	0	0	17	<=	0.03	S	S	<=	0.03	S	<=	0.06	S	<=	0.06	S	S	<=	0.5	S	S	<=	0.5	S	neg	=	0.06	S	=	0.06	S	<=	1	S	<=	2	S	neg	neg
20160308	51	19to64	SAMN05222863	40	106121	267972	2044241	35B	1	558	4	7	7	=	2	R	S	=	4	I	=	0.5	I	=	1	I	S	=	1	I	S	>	2	R	neg	=	0.06	S	=	0.06	S	<=	1	S	<=	2	S	neg	neg
20160309	64	19to64	SAMN05222864	96	45022	109475	2159609	15A	neg	11576	15	12	18	=	2	R	S	=	2	S	=	0.5	I	=	1	I	S	=	1	I	S	>	2	R	MEF	=	8	R	=	0.06	S	<=	1	S	<=	2	S	neg	FOLA-Q1H,Q11H,E14D,I20L:FOLP_178-ins
20160310	1	0-4	SAMN05222865	86	76172	201599	2108916	19A	1:2	2268	27	36	8	=	4	R	I	=	8	R	=	1	R	=	1	I	S	=	2	R	I	>	2	R	MEF	=	8	R	=	0.06	S	<=	1	S	<=	2	S	neg	FOLP_178-ins
20160311	65	>65	SAMN05222866	55	132796	224896	2081165	16F	neg	1840	0	10	14	=	0.06	S	S	<=	0.03	S	<=	0.06	S	=	0.12	S	S	<=	0.5	S	S	<=	0.5	S	neg	=	0.06	S	=	0.06	S	<=	1	S	<=	2	S	neg	neg
20160442	84	>65	SAMN05222867	57	96196	249641	2112461	15A	neg	63	24	27	28	=	0.25	R	S	<=	0.03	S	<=	0.06	S	=	0.12	S	S	<=	0.5	S	S	<=	0.5	S	ERMB	>	32	R	>	2	R	<=	1	S	<=	2	S	pos	neg
20160443	54	19to64	SAMN05222868	53	117743	177896	2053699	20	neg	1257	1	4	2	<=	0.03	S	S	<=	0.03	S	<=	0.06	S	<=	0.06	S	S	<=	0.5	S	S	<=	0.5	S	neg	=	0.06	S	=	0.06	S	<=	1	S	<=	2	S	neg	neg
20160444	50	19to64	SAMN05222869	33	144187	666912	1992340	8	neg	1480	3	5	5	<=	0.03	S	S	<=	0.03	S	<=	0.06	S	<=	0.06	S	S	<=	0.5	S	S	<=	0.5	S	neg	=	0.06	S	=	0.06	S	<=	1	S	<=	2	S	neg	neg
20160445	76	>65	SAMN05222870	54	77748	186434	1984191	12F	neg	220	0	0	2	<=	0.03	S	S	<=	0.03	S	<=	0.06	S	<=	0.06	S	S	<=	0.5	S	S	<=	0.5	S	neg	=	0.06	S	=	0.06	S	<=	1	S	<=	2	S	neg	neg
20160446	50	19to64	SAMN05222871	73	58829	255039	2071117	22F	neg	433	1	2	2	<=	0.03	S	S	<=	0.03	S	<=	0.06	S	<=	0.06	S	S	<=	0.5	S	S	<=	0.5	S	neg	=	0.06	S	=	0.06	S	<=	1	S	<=	2	S	neg	neg
20160447	59	19to64	SAMN05222872	70	69541	166291	2093830	20	neg	1257	1	4	2	<=	0.03	S	S	<=	0.03	S	<=	0.06	S	<=	0.06	S	S	<=	0.5	S	S	<=	0.5	S	neg	=	0.06	S	=	0.06	S	<=	1	S	<=	2	S	neg	neg
20160448	71	>65	SAMN05222873	44	127413	276847	2085285	16F	neg	1840	0	10	14	=	0.06	S	S	<=	0.03	S	<=	0.06	S	=	0.12	S	S	<=	0.5	S	S	<=	0.5	S	neg	=	0.06	S	=	0.06	S	<=	1	S	<=	2	S	neg	neg
20160449	0	0-4	SAMN05222874	70	97797	193060	2128262	17F	neg	392	11	0	0	<=	0.03	S	S	<=	0.03	S	<=	0.06	S	<=	0.06	S	S	<=	0.5	S	S	<=	0.5	S	neg	=	0.06	S	=	0.06	S	<=	1	S	<=	2	S	neg	neg
20160523	4	0-4	SAMN05222875	49	96289	367008	2045874	15A	neg	63	24	27	8	=	0.5	R	S	=	0.25	S	=	0.12	S	=	0.5	S	S	=	1	I	S	>	2	R	ERMB	>	32	R	>	2	R	<=	1	S	<=	2	S	pos	neg
20160524	40	19to64	SAMN05222876	47	85177	284102	2067845	22F	neg	433	1	2	2	<=	0.03	S	S	<=	0.03	S	<=	0.06	S	<=	0.06	S	S	<=	0.5	S	S	<=	0.5	S	neg	=	0.06	S	=	0.06	S	<=	1	S	<=	2	S	neg	neg
20160525	59	19to64	SAMN05222877	68	68617	212217	2064879	19A	1:2	320	13	11	16	=	4	R	I	=	8	R	=	1	R	=	2	R	I	=	2	R	I	>	2	R	ERMB:MEF	>	32	R	>	2	R	<=	1	S	<=	2	S	pos	FOLA-Q1Y,Q11H,E14D,I20L:FOLP_195-ins
20160526	78	>65	SAMN05222878	58	59473	261309	2047204	22F	neg	433	1	2	2	<=	0.03	S	S	<=	0.03	S	<=	0.06	S	<=	0.06	S	S	<=	0.5	S	S	<=	0.5	S	neg	=	0.06	S	=	0.06	S	<=	1	S	<=	2	S	neg	neg
20160527	57	19to64	SAMN05222879	76	53519	141305	2144452	NT	1	11597	2	0	53	<=	0.03	S	S	<=	0.03	S	<=	0.06	S	<=	0.06	S	S	<=	0.5	S	S	<=	0.5	S	neg	=	0.06	S	=	0.06	S	<=	1	S	<=	2	S	neg	FOLA-Q1H,E14D,I20L:FOLP_169-ins
20160528	1	0-4	SAMN05222880	85	40578	102802	2055955	35B	1	558	4	7	7	=	2	R	S	=	4	I	=	0.5	I	=	1	I	S	=	1	I	S	>	2	R	MEF	=	8	R	=	0.06	S	<=	1	S	<=	2	S	neg	neg
20160529	81	>65	SAMN05222881	47	145130	327466	2103056	19A	neg	276	17	7	18	=	2	R	S	=	1	S	=	0.5	I	=	1	I	S	=	1	I	S	>	2	R	ERMB	>	32	R	>	2	R	<=	1	S	<=	2	S	pos	FOLP_180-ins
20160530	82	>65	SAMN05222882	44	114751	290292	2067139	22F	neg	433	1	2	2	<=	0.03	S	S	<=	0.03	S	<=	0.06	S	<=	0.06	S	S	<=	0.5	S	S	<=	0.5	S	neg	=	0.06	S	=	0.06	S	<=	1	S	<=	2	S	neg	neg
20160531	52	19to64	SAMN05222883	923	15201	61017	1982438	3	neg	180	2	3	2	<=	0.03	S	S	<=	0.03	S	<=	0.06	S	<=	0.06	S	S	<=	0.5	S	S	<=	0.5	S	neg	=	0.06	S	=	0.06	S	<=	1	S	<=	2	S	neg	neg
20160533	39	19to64	SAMN05222884	47	121166	302203	2099656	23A	neg	338	0	1	1	=	0.25	R	S	=	0.06	S	<=	0.06	S	=	0.12	S	S	<=	0.5	S	S	<=	0.5	S	neg	=	0.06	S	=	0.06	S	<=	1	S	<=	2	S	neg	FOLA-I20L
20160534	87	>65	SAMN05222885	54	89690	171799	2014663	35B	1	11604	4	7	7	=	2	R	S	=	4	I	=	0.5	I	=	1	I	S	=	1	I	S	>	2	R	MEF	=	8	R	=	0.06	S	<=	1	S	<=	2	S	neg	neg
20160535	51	19to64	SAMN05222886	76	56640	225571	2073059	22F	neg	433	1	2	2	<=	0.03	S	S	<=	0.03	S	<=	0.06	S	<=	0.06	S	S	<=	0.5	S	S	<=	0.5	S	neg	=	0.06	S	=	0.06	S	<=	1	S	<=	2	S	neg	neg
20160536	44	19to64	SAMN05222887	46	100184	354817	2130055	9N	neg	632	1	0	0	<=	0.03	S	S	<=	0.03	S	<=	0.06	S	<=	0.06	S	S	<=	0.5	S	S	<=	0.5	S	neg	=	0.06	S	=	0.06	S	<=	1	S	<=	2	S	neg	neg
20160537	53	19to64	SAMN05222888	108	53500	127269	2185546	19A	1	695	8	0	11	=	0.12	R	S	=	0.06	S	<=	0.06	S	<=	0.06	S	S	<=	0.5	S	S	<=	0.5	S	MEF	=	8	R	=	0.06	S	<=	1	S	<=	2	S	neg	neg
20160538	4	0-4	SAMN05222889	79	54292	185875	2115303	19F	2	654	11	0	0	<=	0.03	S	S	<=	0.03	S	<=	0.06	S	<=	0.06	S	S	<=	0.5	S	S	<=	0.5	S	neg	=	0.06	S	=	0.06	S	<=	1	S	<=	2	S	neg	neg
20160539	72	>65	SAMN05222890	49	109920	283802	2079435	17F	neg	63	0	27	13	=	0.25	R	S	=	0.12	S	<=	0.06	S	=	0.12	S	S	<=	0.5	S	S	<=	0.5	S	ERMB	>	32	R	>	2	R	<=	1	S	<=	2	S	pos	FOLA-I20L:FOLP_180-ins
20160540	53	19to64	SAMN05222891	60	69437	114886	2056823	22F	neg	433	1	2	2	<=	0.03	S	S	<=	0.03	S	<=	0.06	S	<=	0.06	S	S	<=	0.5	S	S	<=	0.5	S	neg	=	0.06	S	=	0.06	S	<=	1	S	<=	2	S	neg	neg
20160541	64	19to64	SAMN05222892	58	131154	273429	2053740	16F	neg	659	9	0	3	<=	0.03	S	S	<=	0.03	S	<=	0.06	S	<=	0.06	S	S	<=	0.5	S	S	<=	0.5	S	neg	=	0.06	S	=	0.06	S	<=	1	S	<=	2	S	neg	neg
20160542	50	19to64	SAMN05222893	66	87076	161152	2089400	9N	neg	1257	1	4	2	<=	0.03	S	S	<=	0.03	S	<=	0.06	S	<=	0.06	S	S	<=	0.5	S	S	<=	0.5	S	neg	=	0.06	S	=	0.06	S	<=	1	S	<=	2	S	neg	neg
20160543	74	>65	SAMN05222894	40	l	444214	2058013	16F	neg	659	9	0	3	<=	0.03	S	S	<=	0.03	S	<=	0.06	S	<=	0.06	S	S	<=	0.5	S	S	<=	0.5	S	neg	=	0.06	S	=	0.06	S	<=	1	S	<=	2	S	neg	neg
20160544	57	19to64	SAMN05222895	89	123427	209014	2089249	20	neg	1257	1	4	2	<=	0.03	S	S	<=	0.03	S	<=	0.06	S	<=	0.06	S	S	<=	0.5	S	S	<=	0.5	S	neg	=	0.06	S	=	0.06	S	<=	1	S	<=	2	S	neg	neg
20160545	77	>65	SAMN05222896	36	84646	254682	2046023	33F	neg	100	2	0	6	<=	0.03	S	S	<=	0.03	S	<=	0.06	S	<=	0.06	S	S	<=	0.5	S	S	<=	0.5	S	MEF	=	8	R	=	0.06	S	<=	1	S	<=	2	S	neg	FOLP_189-ins
20160546	28	19to64	SAMN05222897	28	155071	469696	1997692	8	neg	1480	3	5	5	<=	0.03	S	S	<=	0.03	S	<=	0.06	S	<=	0.06	S	S	<=	0.5	S	S	<=	0.5	S	neg	=	0.06	S	=	0.06	S	<=	1	S	<=	2	S	neg	neg
20160547	57	19to64	SAMN05222898	26	323440	563281	1990233	3	neg	180	2	3	2	<=	0.03	S	S	<=	0.03	S	<=	0.06	S	<=	0.06	S	S	<=	0.5	S	S	<=	0.5	S	neg	=	0.06	S	=	0.06	S	<=	1	S	<=	2	S	neg	neg
20160548	84	>65	SAMN05222899	68	61445	223114	2112018	22F	neg	433	1	2	2	<=	0.03	S	S	<=	0.03	S	<=	0.06	S	<=	0.06	S	S	<=	0.5	S	S	<=	0.5	S	neg	=	0.06	S	=	0.06	S	<=	1	S	<=	2	S	neg	neg
20160549	74	>65	SAMN05222900	92	45755	246828	2148681	38	neg	393	2	4	4	<=	0.03	S	S	<=	0.03	S	<=	0.06	S	<=	0.06	S	S	<=	0.5	S	S	<=	0.5	S	neg	=	0.06	S	=	0.06	S	<=	1	S	<=	2	S	neg	neg
20160550	58	19to64	SAMN05222901	146	47517	134303	2057823	22F	neg	433	1	2	2	<=	0.03	S	S	<=	0.03	S	<=	0.06	S	<=	0.06	S	S	<=	0.5	S	S	<=	0.5	S	neg	=	0.06	S	=	0.06	S	<=	1	S	<=	2	S	neg	neg
20160551	80	>65	SAMN05222902	55	186110	274440	2094371	7C	1	177	2	0	3	<=	0.03	S	S	<=	0.03	S	<=	0.06	S	<=	0.06	S	S	<=	0.5	S	S	<=	0.5	S	R23S1-A29G	=	0.06	S	=	0.06	S	<=	1	S	<=	2	S	neg	FOLA-Q1H,I20L:FOLP_177-ins:FOLP_180-ins
20160552	34	19to64	SAMN05222903	36	146554	215890	2075260	23A	neg	338	19	1	24	=	0.5	R	S	=	0.25	S	<=	0.06	S	=	0.25	S	S	<=	0.5	S	S	<=	0.5	S	ERMB	>	32	R	>	2	R	<=	1	S	<=	2	S	pos	neg
20160553	56	19to64	SAMN05222904	137	46796	99445	2056672	22F	neg	7314	1	2	2	<=	0.03	S	S	<=	0.03	S	<=	0.06	S	<=	0.06	S	S	<=	0.5	S	S	<=	0.5	S	MEF	=	8	R	=	0.06	S	<=	1	S	<=	2	S	neg	neg
20160554	64	19to64	SAMN05222905	52	84726	301850	2028358	19A	neg	320	13	11	16	=	4	R	I	=	8	R	=	1	R	=	2	R	I	=	2	R	I	>	2	R	ERMB:MEF	>	32	R	>	2	R	<=	1	S	<=	2	S	pos	FOLA-Q1Y,Q11H,E14D,I20L:FOLP_195-ins
20160555	23	19to64	SAMN05222906	371	32892	99784	2116322	15B	1	10161	7	8	9	=	0.25	R	S	=	0.5	S	=	0.12	S	=	0.12	S	S	<=	0.5	S	S	<=	0.5	S	MEF	=	8	R	=	0.06	S	<=	1	S	<=	2	S	neg	neg
20160556	45	19to64	SAMN05222907	33	199136	297259	1996210	8	neg	1480	3	5	5	<=	0.03	S	S	<=	0.03	S	<=	0.06	S	<=	0.06	S	S	<=	0.5	S	S	<=	0.5	S	neg	=	0.06	S	=	0.06	S	<=	1	S	<=	2	S	neg	neg
20160557	59	19to64	SAMN05222908	63	113800	317392	2077561	15A	neg	63	24	27	13	=	0.25	R	S	=	0.25	S	<=	0.06	S	=	0.25	S	S	<=	0.5	S	S	<=	0.5	S	ERMB	>	32	R	>	2	R	<=	1	S	<=	2	S	pos	FOLP_180-ins
20160558	75	>65	SAMN05222909	70	63893	377056	2045669	19A	1:2	320	13	11	16	=	4	R	I	=	8	R	=	1	R	=	2	R	I	=	2	R	I	>	2	R	ERMB:MEF	>	32	R	>	2	R	<=	1	S	<=	2	S	pos	FOLA-Q1Y,Q11H,E14D,I20L:FOLP_195-ins
20160559	90	>65	SAMN05222910	49	93314	269715	2002465	35B	1	558	4	7	7	=	2	R	S	=	4	I	=	0.5	I	=	1	I	S	=	1	I	S	>	2	R	MEF	=	8	R	=	0.06	S	<=	1	S	<=	2	S	neg	neg
20160560	59	19to64	SAMN05222911	43	139073	325022	2106581	15C	1	3280	7	8	9	=	0.25	R	S	=	0.5	S	=	0.12	S	=	0.12	S	S	<=	0.5	S	S	<=	0.5	S	MEF	=	8	R	=	0.06	S	<=	1	S	<=	2	S	neg	FOLA-Q1H,D12T,I20L:FOLP_177-ins:FOLP_180-ins
20160561	68	>65	SAMN05222912	44	132940	394183	2111783	15B	1	3280	7	8	9	=	0.25	R	S	=	0.5	S	=	0.12	S	=	0.12	S	S	<=	0.5	S	S	<=	0.5	S	MEF	=	8	R	=	0.06	S	<=	1	S	<=	2	S	neg	FOLP_177-ins
20160562	69	>65	SAMN05222913	32	224581	348195	2103721	16F	neg	1840	0	10	2	<=	0.03	S	S	<=	0.03	S	<=	0.06	S	<=	0.06	S	S	<=	0.5	S	S	<=	0.5	S	neg	=	0.06	S	=	0.06	S	<=	1	S	<=	2	S	neg	neg
20160563	2	0-4	SAMN05222914	34	158526	416270	2057566	33F	neg	100	2	0	6	<=	0.03	S	S	<=	0.03	S	<=	0.06	S	<=	0.06	S	S	<=	0.5	S	S	<=	0.5	S	MEF	=	8	R	=	0.06	S	<=	1	S	<=	2	S	neg	FOLP_189-ins
20160565	39	19to64	SAMN05222916	44	167461	431103	1988833	3	neg	180	2	3	2	<=	0.03	S	S	<=	0.03	S	<=	0.06	S	<=	0.06	S	S	<=	0.5	S	S	<=	0.5	S	neg	=	0.06	S	=	0.06	S	<=	1	S	<=	2	S	neg	neg
20160566	74	>65	SAMN05222917	109	90847	296162	2082651	16F	neg	10148	0	10	14	=	0.06	S	S	<=	0.03	S	<=	0.06	S	=	0.12	S	S	<=	0.5	S	S	<=	0.5	S	neg	=	0.06	S	=	0.06	S	<=	1	S	<=	2	S	neg	neg
20160567	33	19to64	SAMN05222918	121	82664	172743	2184047	23B	neg	1373	0	1	1	=	0.25	R	S	=	0.06	S	<=	0.06	S	=	0.12	S	S	<=	0.5	S	S	<=	0.5	S	neg	=	0.06	S	=	0.06	S	<=	1	S	<=	2	S	neg	FOLP_180-ins
20160568	1	0-4	SAMN05222919	60	112070	178322	2042833	3	neg	180	2	0	2	<=	0.03	S	S	<=	0.03	S	<=	0.06	S	<=	0.06	S	S	<=	0.5	S	S	<=	0.5	S	ERMB:ERMBS:ERMBUP	=	0.06	S	=	0.06	S	<=	1	S	<=	2	S	neg	neg
20160569	102	>65	SAMN05222920	50	120415	297377	2075409	23B	neg	439	0	0	0	<=	0.03	S	S	<=	0.03	S	<=	0.06	S	<=	0.06	S	S	<=	0.5	S	S	<=	0.5	S	MEF	=	8	R	=	0.06	S	<=	1	S	<=	2	S	neg	neg
20160570	81	>65	SAMN05222921	53	88003	305984	2101917	23A	neg	338	0	1	1	=	0.25	R	S	=	0.06	S	<=	0.06	S	=	0.12	S	S	<=	0.5	S	S	<=	0.5	S	neg	=	0.06	S	=	0.06	S	<=	1	S	<=	2	S	neg	neg
20160571	35	19to64	SAMN05222922	46	87710	227734	2016403	35B	1	558	4	7	7	=	2	R	S	=	4	I	=	0.5	I	=	1	I	S	=	1	I	S	>	2	R	MEF	=	8	R	=	0.06	S	<=	1	S	<=	2	S	neg	neg
20160572	82	>65	SAMN05222923	48	94705	253390	2107416	23A	neg	338	0	1	1	=	0.25	R	S	=	0.06	S	<=	0.06	S	=	0.12	S	S	<=	0.5	S	S	<=	0.5	S	neg	=	0.06	S	=	0.06	S	<=	1	S	<=	2	S	neg	neg
20160573	68	>65	SAMN05222924	50	115630	305975	2104823	23A	neg	338	0	1	1	=	0.25	R	S	=	0.06	S	<=	0.06	S	=	0.12	S	S	<=	0.5	S	S	<=	0.5	S	neg	=	0.06	S	=	0.06	S	<=	1	S	<=	2	S	neg	neg
20160574	56	19to64	SAMN05222925	58	140104	253075	2017762	8	neg	1480	3	5	5	<=	0.03	S	S	<=	0.03	S	<=	0.06	S	<=	0.06	S	S	<=	0.5	S	S	<=	0.5	S	neg	=	0.06	S	=	0.06	S	<=	1	S	<=	2	S	neg	neg
20160575	53	19to64	SAMN05222926	51	104596	289498	2009170	9N	neg	4666	23	0	0	<=	0.03	S	S	<=	0.03	S	<=	0.06	S	<=	0.06	S	S	<=	0.5	S	S	<=	0.5	S	neg	=	0.06	S	=	0.06	S	<=	1	S	<=	2	S	neg	neg
20160576	71	>65	SAMN05222927	55	79860	191058	2077838	6C	neg	2440	1	6	0	<=	0.03	S	S	<=	0.03	S	<=	0.06	S	<=	0.06	S	S	<=	0.5	S	S	<=	0.5	S	neg	=	0.06	S	=	0.06	S	<=	1	S	<=	2	S	neg	FOLP_195-ins
20160577	6	5to18	SAMN05222928	65	109904	272690	2150242	15C	neg	83	15	12	18	=	2	R	S	=	2	S	=	0.5	I	=	1	I	S	=	1	I	S	>	2	R	ERMB:ERMBUP	>	32	R	>	2	R	<=	1	S	<=	2	S	pos	FOLA-Q1H,Q11H,E14D,I20L:FOLP_178-ins
20160578	88	>65	SAMN05222929	71	89729	327548	2070791	35B	1	10493	4	7	7	=	2	R	S	=	4	I	=	0.5	I	=	1	I	S	=	1	I	S	>	2	R	MEF	=	8	R	=	0.06	S	<=	1	S	<=	2	S	neg	neg
20160579	86	>65	SAMN05222930	87	57559	179229	1997932	7F	2	191	2	0	2	<=	0.03	S	S	<=	0.03	S	<=	0.06	S	<=	0.06	S	S	<=	0.5	S	S	<=	0.5	S	neg	=	0.06	S	=	0.06	S	<=	1	S	<=	2	S	neg	neg
20160580	7	5to18	SAMN05222931	70	128820	259107	2065497	35F	neg	498	0	0	3	<=	0.03	S	S	<=	0.03	S	<=	0.06	S	<=	0.06	S	S	<=	0.5	S	S	<=	0.5	S	neg	=	0.06	S	=	0.06	S	<=	1	S	<=	2	S	neg	neg
20160581	5	5to18	SAMN05222932	79	56685	152602	2077025	22F	neg	433	1	2	2	<=	0.03	S	S	<=	0.03	S	<=	0.06	S	<=	0.06	S	S	<=	0.5	S	S	<=	0.5	S	neg	=	0.06	S	=	0.06	S	<=	1	S	<=	2	S	neg	neg
20160582	90	>65	SAMN05222933	52	97765	362034	2105712	34	neg	547	0	0	2	<=	0.03	S	S	<=	0.03	S	<=	0.06	S	<=	0.06	S	S	<=	0.5	S	S	<=	0.5	S	neg	=	0.06	S	=	0.06	S	<=	1	S	<=	2	S	neg	neg
20160583	83	>65	SAMN05222934	56	100313	315409	2065786	15A	neg	63	24	27	28	=	0.25	R	S	<=	0.03	S	<=	0.06	S	=	0.12	S	S	<=	0.5	S	S	<=	0.5	S	ERMB	>	32	R	>	2	R	<=	1	S	<=	2	S	pos	neg
20160584	65	>65	SAMN05222935	99	73758	223411	2055947	23A	neg	338	0	1	1	=	0.25	R	S	=	0.06	S	<=	0.06	S	=	0.12	S	S	<=	0.5	S	S	<=	0.5	S	neg	=	0.06	S	=	0.06	S	<=	1	S	<=	2	S	neg	neg
20160585	78	>65	SAMN05222936	45	83036	161271	1981158	12F	neg	220	0	0	2	<=	0.03	S	S	<=	0.03	S	<=	0.06	S	<=	0.06	S	S	<=	0.5	S	S	<=	0.5	S	neg	=	0.06	S	=	0.06	S	<=	1	S	<=	2	S	neg	neg
20160586	72	>65	SAMN05222937	65	82246	198609	2012166	35B:35D	1	558	4	7	7	=	2	R	S	=	4	I	=	0.5	I	=	1	I	S	=	1	I	S	>	2	R	MEF	=	8	R	=	0.06	S	<=	1	S	<=	2	S	neg	neg
20160587	84	>65	SAMN05222938	63	94252	161455	2081753	15A	neg	63	24	27	179	=	0.25	R	S	=	0.12	S	<=	0.06	S	=	0.12	S	S	<=	0.5	S	S	<=	0.5	S	ERMB	>	32	R	>	2	R	<=	1	S	<=	2	S	pos	neg
20160590	2	0-4	SAMN05222939	99	39813	130426	2124418	15B	1	162	1	0	0	<=	0.03	S	S	<=	0.03	S	<=	0.06	S	<=	0.06	S	S	<=	0.5	S	S	<=	0.5	S	neg	=	0.06	S	=	0.06	S	<=	1	S	<=	2	S	neg	neg
20160591	54	19to64	SAMN05222940	90	42388	160868	2080876	22F	neg	433	1	2	2	<=	0.03	S	S	<=	0.03	S	<=	0.06	S	<=	0.06	S	S	<=	0.5	S	S	<=	0.5	S	neg	=	0.06	S	=	0.06	S	<=	1	S	<=	2	S	neg	neg
20160592	91	>65	SAMN05222941	79	45615	178319	2021337	31	neg	568	12	0	0	<=	0.03	S	S	<=	0.03	S	<=	0.06	S	<=	0.06	S	S	<=	0.5	S	S	<=	0.5	S	neg	=	0.06	S	=	0.06	S	<=	1	S	<=	2	S	neg	neg
20160593	68	>65	SAMN05222942	78	64811	223351	2073172	23A	neg	438	2	0	6	<=	0.03	S	S	<=	0.03	S	<=	0.06	S	<=	0.06	S	S	<=	0.5	S	S	<=	0.5	S	neg	=	0.06	S	=	0.06	S	<=	1	S	<=	2	S	neg	neg
20160594	46	19to64	SAMN05222943	38	183011	264498	1975042	3	neg	180	2	0	2	<=	0.03	S	S	<=	0.03	S	<=	0.06	S	<=	0.06	S	S	<=	0.5	S	S	<=	0.5	S	neg	=	0.06	S	=	0.06	S	<=	1	S	<=	2	S	neg	neg
20160595	68	>65	SAMN05222944	44	103121	280832	2065886	10A	neg	97	0	40	2	<=	0.03	S	S	<=	0.03	S	<=	0.06	S	<=	0.06	S	S	<=	0.5	S	S	<=	0.5	S	neg	=	0.06	S	=	0.06	S	<=	1	S	<=	2	S	neg	neg
20160596	36	19to64	SAMN05222945	80	70009	182835	2005622	7F	2	191	2	0	2	<=	0.03	S	S	<=	0.03	S	<=	0.06	S	<=	0.06	S	S	<=	0.5	S	S	<=	0.5	S	MEF	=	8	R	=	0.06	S	<=	1	S	<=	2	S	neg	neg
20160597	52	19to64	SAMN05222946	103	52709	247858	2146562	15C	1	162	1	0	0	<=	0.03	S	S	<=	0.03	S	<=	0.06	S	<=	0.06	S	S	<=	0.5	S	S	<=	0.5	S	neg	=	0.06	S	=	0.06	S	<=	1	S	<=	2	S	neg	neg
20160598	5	5to18	SAMN05222947	40	112302	332933	2058603	23B	neg	1373	0	1	1	=	0.25	R	S	=	0.06	S	<=	0.06	S	=	0.12	S	S	<=	0.5	S	S	<=	0.5	S	neg	=	0.06	S	=	0.06	S	<=	1	S	<=	2	S	neg	FOLP_180-ins
20160729	3	0-4	SAMN05222948	81	74444	128209	2189275	19A	1	695	8	0	11	=	0.12	R	S	=	0.06	S	<=	0.06	S	<=	0.06	S	S	<=	0.5	S	S	<=	0.5	S	neg	=	0.06	S	=	0.06	S	<=	1	S	<=	2	S	neg	neg
20160730	44	19to64	SAMN05222949	40	136117	267013	2114600	34	neg	547	0	0	2	<=	0.03	S	S	<=	0.03	S	<=	0.06	S	<=	0.06	S	S	<=	0.5	S	S	<=	0.5	S	neg	=	0.06	S	=	0.06	S	<=	1	S	<=	2	S	neg	neg
20160731	0	0-4	SAMN05222950	62	75114	291142	2090927	19A	1:2	1451	13	11	16	=	4	R	I	=	8	R	=	1	R	=	2	R	I	=	2	R	I	>	2	R	ERMB:MEF	>	32	R	>	2	R	<=	1	S	<=	2	S	pos	FOLA-Q1Y,Q11H,E14D,I20L:FOLP_195-ins
20160732	77	>65	SAMN05222951	60	93426	316084	2067276	15A	neg	11572	24	27	28	=	0.25	R	S	<=	0.03	S	<=	0.06	S	=	0.12	S	S	<=	0.5	S	S	<=	0.5	S	ERMB	>	32	R	>	2	R	<=	1	S	<=	2	S	pos	FOLP_178-ins
20160733	4	0-4	SAMN05222952	26	180228	339722	2056030	33F	neg	100	2	0	6	<=	0.03	S	S	<=	0.03	S	<=	0.06	S	<=	0.06	S	S	<=	0.5	S	S	<=	0.5	S	MEF	=	8	R	=	0.06	S	<=	1	S	<=	2	S	neg	FOLP_189-ins
20160734	28	19to64	SAMN05222953	89	54745	148944	2155303	19A	1	695	8	NF	11	=	0.06	S	S	=	0.06	S	<=	0.06	S	<=	0.06	S	S	=	0.06	S	S	<=	0.5	S	neg	=	0.06	S	=	0.06	S	<=	1	S	<=	2	S	neg	neg
20160735	68	>65	SAMN05222954	61	94098	310806	2082088	19F	neg	425	2	4	0	<=	0.03	S	S	<=	0.03	S	<=	0.06	S	<=	0.06	S	S	<=	0.5	S	S	<=	0.5	S	neg	=	0.06	S	=	0.06	S	<=	1	S	<=	2	S	neg	neg
20160736	16	5to18	SAMN05222955	73	118668	191258	2021386	11A	2	62	2	6	0	<=	0.03	S	S	<=	0.03	S	<=	0.06	S	<=	0.06	S	S	<=	0.5	S	S	<=	0.5	S	neg	=	0.06	S	=	0.06	S	<=	1	S	<=	2	S	neg	neg
20160737	83	>65	SAMN05222956	221	64481	188988	2124252	7C	neg	1797	2	4	178	<=	0.03	S	S	<=	0.03	S	<=	0.06	S	<=	0.06	S	S	<=	0.5	S	S	<=	0.5	S	neg	=	0.06	S	=	0.06	S	<=	1	S	<=	2	S	neg	neg
20160738	86	>65	SAMN05222957	50	114975	187744	2089803	9N	neg	632	1	0	0	<=	0.03	S	S	<=	0.03	S	<=	0.06	S	<=	0.06	S	S	<=	0.5	S	S	<=	0.5	S	neg	=	0.06	S	=	0.06	S	<=	1	S	<=	2	S	neg	neg
20160739	56	19to64	SAMN05222958	51	83194	236802	2087247	9N	neg	632	1	0	0	<=	0.03	S	S	<=	0.03	S	<=	0.06	S	<=	0.06	S	S	<=	0.5	S	S	<=	0.5	S	neg	=	0.06	S	=	0.06	S	<=	1	S	<=	2	S	neg	neg
20160740	54	19to64	SAMN05222959	50	125342	266077	2059109	19A	neg	667	0	0	0	<=	0.03	S	S	<=	0.03	S	<=	0.06	S	<=	0.06	S	S	<=	0.5	S	S	<=	0.5	S	neg	=	0.06	S	=	0.06	S	<=	1	S	<=	2	S	neg	neg
20160741	83	>65	SAMN05222960	67	64791	193697	2063289	34	neg	547	0	0	2	<=	0.03	S	S	<=	0.03	S	<=	0.06	S	<=	0.06	S	S	<=	0.5	S	S	<=	0.5	S	neg	=	0.06	S	=	0.06	S	<=	1	S	<=	2	S	neg	neg
20160742	35	19to64	SAMN05222961	70	55382	183647	2110120	19F	2	654	2	0	0	<=	0.03	S	S	<=	0.03	S	<=	0.06	S	<=	0.06	S	S	<=	0.5	S	S	<=	0.5	S	neg	=	0.06	S	=	0.06	S	<=	1	S	<=	2	S	neg	neg
20160743	9	5to18	SAMN05222962	79	81372	197833	1991441	3	neg	180	2	3	2	<=	0.03	S	S	<=	0.03	S	<=	0.06	S	<=	0.06	S	S	<=	0.5	S	S	<=	0.5	S	neg	=	0.06	S	=	0.06	S	<=	1	S	<=	2	S	neg	neg
20160744	62	19to64	SAMN05222963	75	68887	160050	2048582	19A	1:2	320	13	14	26	=	8	R	R	=	8	R	=	1	R	=	8	R	R	=	4	R	R	>	2	R	ERMB:MEF	>	32	R	>	2	R	<=	1	S	<=	2	S	pos	FOLA-Q1Y,Q11H,E14D,I20L:FOLP_195-ins
20160745	58	19to64	SAMN05222964	64	100713	279713	2098733	20	neg	1257	1	4	2	<=	0.03	S	S	<=	0.03	S	<=	0.06	S	<=	0.06	S	S	<=	0.5	S	S	<=	0.5	S	neg	=	0.06	S	=	0.06	S	<=	1	S	<=	2	S	neg	neg
20160881	75	>65	SAMN05222965	72	82112	178164	2089593	16F	neg	3157	0	0	3	<=	0.03	S	S	<=	0.03	S	<=	0.06	S	<=	0.06	S	S	<=	0.5	S	S	<=	0.5	S	neg	=	0.06	S	=	0.06	S	<=	1	S	<=	2	S	neg	neg
20160882	75	>65	SAMN05222966	154	36629	94624	2167296	23B	neg	1373	0	1	1	=	0.25	R	S	=	0.06	S	<=	0.06	S	=	0.12	S	S	<=	0.5	S	S	<=	0.5	S	neg	=	0.06	S	=	0.06	S	<=	1	S	<=	2	S	neg	FOLP_180-ins
20160883	50	19to64	SAMN05222967	84	66589	182551	2148353	23B	neg	1373	0	1	1	=	0.25	R	S	=	0.06	S	<=	0.06	S	=	0.12	S	S	<=	0.5	S	S	<=	0.5	S	neg	=	0.06	S	=	0.06	S	<=	1	S	<=	2	S	neg	FOLP_180-ins
20160885	78	>65	SAMN05222968	36	207573	445292	2023756	3	neg	180	2	3	2	<=	0.03	S	S	<=	0.03	S	<=	0.06	S	<=	0.06	S	S	<=	0.5	S	S	<=	0.5	S	neg	=	0.06	S	=	0.06	S	<=	1	S	<=	2	S	neg	neg
20160886	3	0-4	SAMN05222969	80	49366	240002	2062587	35B	1	558	4	7	7	=	2	R	S	=	4	I	=	0.5	I	=	1	I	S	=	1	I	S	>	2	R	MEF	=	8	R	=	0.06	S	<=	1	S	<=	2	S	neg	neg
20160887	54	19to64	SAMN05222970	53	110861	297845	2057476	11A	2	11608	2	6	0	<=	0.03	S	S	<=	0.03	S	<=	0.06	S	<=	0.06	S	S	<=	0.5	S	S	<=	0.5	S	MEF	=	8	R	=	0.06	S	<=	1	S	<=	2	S	neg	neg
20160888	98	>65	SAMN05222971	53	112061	314026	2085585	9N	neg	1257	1	4	2	<=	0.03	S	S	<=	0.03	S	<=	0.06	S	<=	0.06	S	S	<=	0.5	S	S	<=	0.5	S	neg	=	0.06	S	=	0.06	S	<=	1	S	<=	2	S	neg	neg
20160889	55	19to64	SAMN05222972	40	220761	332853	2133290	23B	neg	1373	0	1	1	=	0.25	R	S	=	0.06	S	<=	0.06	S	=	0.12	S	S	<=	0.5	S	S	<=	0.5	S	neg	=	0.06	S	=	0.06	S	<=	1	S	<=	2	S	neg	FOLP_180-ins
20160890	56	19to64	SAMN05222973	336	36270	167218	2032148	8	neg	404	3	2	5	<=	0.03	S	S	<=	0.03	S	<=	0.06	S	<=	0.06	S	S	<=	0.5	S	S	<=	0.5	S	neg	=	0.06	S	=	0.06	S	<=	1	S	<=	2	S	neg	neg
20160891	1	0-4	SAMN05222974	33	134472	392806	2106048	15C	1	3280	7	8	9	=	0.25	R	S	=	0.5	S	=	0.12	S	=	0.12	S	S	<=	0.5	S	S	<=	0.5	S	MEF	=	8	R	=	0.06	S	<=	1	S	<=	2	S	neg	FOLP_177-ins
20160892	58	19to64	SAMN05222975	31	126025	300157	2005706	11A	2	62	2	6	0	<=	0.03	S	S	<=	0.03	S	<=	0.06	S	<=	0.06	S	S	<=	0.5	S	S	<=	0.5	S	neg	=	0.06	S	=	0.06	S	<=	1	S	<=	2	S	neg	neg
20160893	40	19to64	SAMN05222976	62	64896	265519	2119951	15C	neg	199	2	0	2	<=	0.03	S	S	<=	0.03	S	<=	0.06	S	<=	0.06	S	S	<=	0.5	S	S	<=	0.5	S	neg	=	0.06	S	=	0.06	S	<=	1	S	<=	2	S	neg	neg
20160894	5	5to18	SAMN05222977	64	127030	318513	2076720	19F	neg	177	23	0	139	<=	0.03	S	S	<=	0.03	S	<=	0.06	S	<=	0.06	S	S	<=	0.5	S	S	<=	0.5	S	neg	=	0.06	S	=	0.06	S	<=	1	S	<=	2	S	neg	FOLA-Q1H,I20L:FOLP_177-ins
20160895	47	19to64	SAMN05222978	71	81728	153624	2137262	9N	neg	632	1	0	0	<=	0.03	S	S	<=	0.03	S	<=	0.06	S	<=	0.06	S	S	<=	0.5	S	S	<=	0.5	S	neg	=	0.06	S	=	0.06	S	<=	1	S	<=	2	S	neg	neg
20160896	83	>65	SAMN05222979	63	59486	180321	2053919	11A	neg	62	2	6	0	<=	0.03	S	S	<=	0.03	S	<=	0.06	S	<=	0.06	S	S	<=	0.5	S	S	<=	0.5	S	MEF	=	8	R	=	0.06	S	<=	1	S	<=	2	S	neg	neg
20160897	89	>65	SAMN05222980	44	92950	186517	1981353	12F	neg	220	0	0	2	<=	0.03	S	S	<=	0.03	S	<=	0.06	S	<=	0.06	S	S	<=	0.5	S	S	<=	0.5	S	neg	=	0.06	S	=	0.06	S	<=	1	S	<=	2	S	neg	neg
20160898	44	19to64	SAMN05222981	53	113976	270780	2074345	15A	neg	63	24	27	11	=	0.12	R	S	=	0.12	S	<=	0.06	S	<=	0.06	S	S	<=	0.5	S	S	<=	0.5	S	ERMB	>	32	R	>	2	R	<=	1	S	<=	2	S	pos	FOLP_178-ins
20160899	1	0-4	SAMN05222982	128	47579	169371	2155707	19F	2	654	2	0	0	<=	0.03	S	S	<=	0.03	S	<=	0.06	S	<=	0.06	S	S	<=	0.5	S	S	<=	0.5	S	neg	=	0.06	S	=	0.06	S	<=	1	S	<=	2	S	neg	neg
20160900	65	>65	SAMN05222983	50	108613	237566	2066382	11A	1	11565	93	0	176	=	0.06	S	S	<=	0.03	S	<=	0.06	S	=	0.12	S	S	<=	0.5	S	S	<=	0.5	S	neg	=	0.06	S	=	0.06	S	<=	1	S	<=	2	S	neg	neg
20160901	54	19to64	SAMN05222984	56	86990	172464	2072733	22F	neg	433	1	2	2	<=	0.03	S	S	<=	0.03	S	<=	0.06	S	<=	0.06	S	S	<=	0.5	S	S	<=	0.5	S	neg	=	0.06	S	=	0.06	S	<=	1	S	<=	2	S	neg	neg
20160902	74	>65	SAMN05222985	64	103943	303680	2107382	21	neg	193	2	0	2	<=	0.03	S	S	<=	0.03	S	<=	0.06	S	<=	0.06	S	S	<=	0.5	S	S	<=	0.5	S	neg	=	0.06	S	=	0.06	S	<=	1	S	<=	2	S	neg	FOLP_169-ins
20160903	39	19to64	SAMN05222986	35	119577	338224	1980469	12F	neg	220	0	0	17	<=	0.03	S	S	<=	0.03	S	<=	0.06	S	<=	0.06	S	S	<=	0.5	S	S	<=	0.5	S	neg	=	0.06	S	=	0.06	S	<=	1	S	<=	2	S	neg	neg
20160904	76	>65	SAMN05222987	53	77802	261471	2074688	22F	neg	433	1	2	2	<=	0.03	S	S	<=	0.03	S	<=	0.06	S	<=	0.06	S	S	<=	0.5	S	S	<=	0.5	S	neg	=	0.06	S	=	0.06	S	<=	1	S	<=	2	S	neg	neg
20160905	0	0-4	SAMN05222988	54	125794	239836	2095106	15C	1	3280	7	8	9	=	0.25	R	S	=	0.5	S	=	0.12	S	=	0.12	S	S	<=	0.5	S	S	<=	0.5	S	MEF	=	8	R	=	0.06	S	<=	1	S	<=	2	S	neg	FOLP_177-ins
20160906	80	>65	SAMN05222989	45	86762	172852	2013123	35B	1	558	4	7	7	=	2	R	S	=	4	I	=	0.5	I	=	1	I	S	=	1	I	S	>	2	R	neg	=	0.06	S	=	0.06	S	<=	1	S	<=	2	S	neg	neg
20160907	75	>65	SAMN05222990	95	91571	192006	1975153	3	neg	180	2	0	2	<=	0.03	S	S	<=	0.03	S	<=	0.06	S	<=	0.06	S	S	<=	0.5	S	S	<=	0.5	S	neg	=	0.06	S	=	0.06	S	<=	1	S	<=	2	S	neg	neg
20160908	63	19to64	SAMN05222991	71	69576	240209	2056432	20	neg	1257	1	4	2	<=	0.03	S	S	<=	0.03	S	<=	0.06	S	<=	0.06	S	S	<=	0.5	S	S	<=	0.5	S	neg	=	0.06	S	=	0.06	S	<=	1	S	<=	2	S	neg	neg
20160909	60	19to64	SAMN05222992	48	91404	275354	1982143	12F	neg	220	0	0	2	<=	0.03	S	S	<=	0.03	S	<=	0.06	S	<=	0.06	S	S	<=	0.5	S	S	<=	0.5	S	neg	=	0.06	S	=	0.06	S	<=	1	S	<=	2	S	neg	neg
20160910	44	19to64	SAMN05222993	38	187855	279009	1976420	3	neg	180	2	0	2	<=	0.03	S	S	<=	0.03	S	<=	0.06	S	<=	0.06	S	S	<=	0.5	S	S	<=	0.5	S	neg	=	0.06	S	=	0.06	S	<=	1	S	<=	2	S	neg	neg
20160911	44	19to64	SAMN05222994	28	185211	469488	1995908	8	neg	1480	3	5	5	<=	0.03	S	S	<=	0.03	S	<=	0.06	S	<=	0.06	S	S	<=	0.5	S	S	<=	0.5	S	neg	=	0.06	S	=	0.06	S	<=	1	S	<=	2	S	neg	neg
20160912	69	>65	SAMN05222995	53	78143	137971	2009922	11A	neg	62	2	6	10	<=	0.03	S	S	<=	0.03	S	<=	0.06	S	<=	0.06	S	S	<=	0.5	S	S	<=	0.5	S	MEF	=	8	R	=	0.06	S	<=	1	S	<=	2	S	neg	neg
20160913	6	5to18	SAMN05222996	55	71063	123549	1984903	12F	neg	220	0	0	2	<=	0.03	S	S	<=	0.03	S	<=	0.06	S	<=	0.06	S	S	<=	0.5	S	S	<=	0.5	S	neg	=	0.06	S	=	0.06	S	<=	1	S	<=	2	S	neg	neg
20160914	56	19to64	SAMN05222997	51	82104	233102	2079801	35B	1	10493	4	7	7	=	2	R	S	=	4	I	=	0.5	I	=	1	I	S	=	1	I	S	>	2	R	MEF	=	8	R	=	0.06	S	<=	1	S	<=	2	S	neg	neg
20160915	64	19to64	SAMN05222998	81	58037	166682	2008404	7F	2	191	2	0	2	<=	0.03	S	S	<=	0.03	S	<=	0.06	S	<=	0.06	S	S	<=	0.5	S	S	<=	0.5	S	neg	=	0.06	S	=	0.06	S	<=	1	S	<=	2	S	neg	neg
20160916	52	19to64	SAMN05222999	46	93583	186462	1983022	12F	neg	220	0	0	2	<=	0.03	S	S	<=	0.03	S	<=	0.06	S	<=	0.06	S	S	<=	0.5	S	S	<=	0.5	S	neg	=	0.06	S	=	0.06	S	<=	1	S	<=	2	S	neg	neg
20160917	55	19to64	SAMN05223000	61	86130	242954	2074201	10A	neg	816	0	0	2	<=	0.03	S	S	<=	0.03	S	<=	0.06	S	<=	0.06	S	S	<=	0.5	S	S	<=	0.5	S	MEF	=	8	R	=	0.06	S	<=	1	S	<=	2	S	neg	neg
20160918	62	19to64	SAMN05223001	69	71235	183567	2090128	20	neg	1257	1	4	2	<=	0.03	S	S	<=	0.03	S	<=	0.06	S	<=	0.06	S	S	<=	0.5	S	S	<=	0.5	S	neg	=	0.06	S	=	0.06	S	<=	1	S	<=	2	S	neg	neg
20160919	67	>65	SAMN05223002	115	36416	114401	2161903	35B	1	1092	6	7	36	=	0.5	R	S	=	1	S	=	0.25	S	=	0.5	S	S	<=	0.5	S	S	=	2	R	neg	=	0.06	S	=	0.06	S	<=	1	S	<=	2	S	neg	FOLA-Q1H,V3I,E14D,I20L:FOLP_195-ins
20160920	47	19to64	SAMN05223003	52	85822	171280	1982168	12F	neg	220	0	0	2	<=	0.03	S	S	<=	0.03	S	<=	0.06	S	<=	0.06	S	S	<=	0.5	S	S	<=	0.5	S	neg	=	0.06	S	=	0.06	S	<=	1	S	<=	2	S	neg	neg
20160921	1	0-4	SAMN05223004	42	72732	199708	2072211	33F	neg	2705	2	0	6	<=	0.03	S	S	<=	0.03	S	<=	0.06	S	<=	0.06	S	S	<=	0.5	S	S	<=	0.5	S	MEF	=	8	R	=	0.06	S	<=	1	S	<=	2	S	neg	FOLP_189-ins
20160922	48	19to64	SAMN05223005	88	55012	143359	2114439	12F	neg	989	12	4	3	<=	0.03	S	S	<=	0.03	S	<=	0.06	S	<=	0.06	S	S	<=	0.5	S	S	<=	0.5	S	neg	=	0.06	S	=	0.06	S	<=	1	S	<=	2	S	neg	FOLA-I20L:FOLP_178-ins
20160923	57	19to64	SAMN05223006	122	56976	191172	2219453	23B	neg	1373	0	1	1	=	0.25	R	S	=	0.06	S	<=	0.06	S	=	0.12	S	S	<=	0.5	S	S	<=	0.5	S	neg	=	0.06	S	=	0.06	S	<=	1	S	<=	2	S	neg	FOLP_180-ins
20160924	52	19to64	SAMN05223007	69	96820	298420	2095206	20	neg	1257	1	4	2	<=	0.03	S	S	<=	0.03	S	<=	0.06	S	<=	0.06	S	S	<=	0.5	S	S	<=	0.5	S	neg	=	0.06	S	=	0.06	S	<=	1	S	<=	2	S	neg	neg
20160925	59	19to64	SAMN05223008	66	88908	249959	2022367	12F	neg	218	0	0	0	<=	0.03	S	S	<=	0.03	S	<=	0.06	S	<=	0.06	S	S	<=	0.5	S	S	<=	0.5	S	MEF	=	8	R	=	0.06	S	<=	1	S	<=	2	S	neg	FOLA-Q1Y,Q11H,E14D,I20L
20160926	56	19to64	SAMN05223009	35	102256	199682	1993286	8	neg	1480	3	5	5	<=	0.03	S	S	<=	0.03	S	<=	0.06	S	<=	0.06	S	S	<=	0.5	S	S	<=	0.5	S	neg	=	0.06	S	=	0.06	S	<=	1	S	<=	2	S	neg	neg
20161039	57	19to64	SAMN05223010	65	85901	209838	2032061	12F	neg	218	0	0	0	<=	0.03	S	S	<=	0.03	S	<=	0.06	S	<=	0.06	S	S	<=	0.5	S	S	<=	0.5	S	MEF	=	8	R	=	0.06	S	<=	1	S	<=	2	S	neg	neg
20161040	58	19to64	SAMN05223011	71	66334	223018	2026920	12F	neg	218	0	0	0	<=	0.03	S	S	<=	0.03	S	<=	0.06	S	<=	0.06	S	S	<=	0.5	S	S	<=	0.5	S	MEF	=	8	R	=	0.06	S	<=	1	S	<=	2	S	neg	neg
20161041	21	19to64	SAMN05223012	44	77737	232675	2040804	22F	neg	433	1	2	2	<=	0.03	S	S	<=	0.03	S	<=	0.06	S	<=	0.06	S	S	<=	0.5	S	S	<=	0.5	S	neg	=	0.06	S	=	0.06	S	<=	1	S	<=	2	S	neg	neg
20161042	46	19to64	SAMN05223013	64	62342	317254	2024989	12F	neg	218	0	0	0	<=	0.03	S	S	<=	0.03	S	<=	0.06	S	<=	0.06	S	S	<=	0.5	S	S	<=	0.5	S	MEF	=	8	R	=	0.06	S	<=	1	S	<=	2	S	neg	neg
20161043	26	19to64	SAMN05223014	36	144308	314033	1997660	8	neg	1480	3	5	5	<=	0.03	S	S	<=	0.03	S	<=	0.06	S	<=	0.06	S	S	<=	0.5	S	S	<=	0.5	S	neg	=	0.06	S	=	0.06	S	<=	1	S	<=	2	S	neg	neg
20161044	66	>65	SAMN05223015	66	62322	209895	2024637	12F	neg	218	0	0	0	<=	0.03	S	S	<=	0.03	S	<=	0.06	S	<=	0.06	S	S	<=	0.5	S	S	<=	0.5	S	MEF	=	8	R	=	0.06	S	<=	1	S	<=	2	S	neg	neg
20161045	27	19to64	SAMN05223016	26	144059	420745	1992650	8	neg	1480	3	5	5	<=	0.03	S	S	<=	0.03	S	<=	0.06	S	<=	0.06	S	S	<=	0.5	S	S	<=	0.5	S	neg	=	0.06	S	=	0.06	S	<=	1	S	<=	2	S	neg	neg
20161046	29	19to64	SAMN05223017	29	198370	366075	2000008	3	neg	1119	0	0	2	<=	0.03	S	S	<=	0.03	S	<=	0.06	S	<=	0.06	S	S	<=	0.5	S	S	<=	0.5	S	neg	=	0.06	S	=	0.06	S	<=	1	S	<=	2	S	neg	neg
20161047	38	19to64	SAMN05223018	59	94313	383320	2027138	12F	neg	218	0	0	0	<=	0.03	S	S	<=	0.03	S	<=	0.06	S	<=	0.06	S	S	<=	0.5	S	S	<=	0.5	S	MEF	=	8	R	=	0.06	S	<=	1	S	<=	2	S	neg	neg
20161048	32	19to64	SAMN05223019	46	168506	446708	1997348	8	neg	1480	3	5	5	<=	0.03	S	S	<=	0.03	S	<=	0.06	S	<=	0.06	S	S	<=	0.5	S	S	<=	0.5	S	neg	=	0.06	S	=	0.06	S	<=	1	S	<=	2	S	neg	neg
20161049	76	>65	SAMN05223020	73	69165	239550	2108232	19F	2	1258	2	78	3	<=	0.03	S	S	<=	0.03	S	<=	0.06	S	<=	0.06	S	S	<=	0.5	S	S	<=	0.5	S	neg	=	0.06	S	=	0.06	S	<=	1	S	<=	2	S	neg	neg
20161051	60	19to64	SAMN05223022	38	168223	278976	1976423	3	neg	180	2	0	2	<=	0.03	S	S	<=	0.03	S	<=	0.06	S	<=	0.06	S	S	<=	0.5	S	S	<=	0.5	S	neg	=	0.06	S	=	0.06	S	<=	1	S	<=	2	S	neg	neg
20161052	30	19to64	SAMN05223023	56	107664	275892	2021072	12F	neg	218	0	0	0	<=	0.03	S	S	<=	0.03	S	<=	0.06	S	<=	0.06	S	S	<=	0.5	S	S	<=	0.5	S	MEF	=	8	R	=	0.06	S	<=	1	S	<=	2	S	neg	neg
20161054	31	19to64	SAMN05223024	47	100905	335401	2087388	9N	neg	1375	1	4	2	<=	0.03	S	S	<=	0.03	S	<=	0.06	S	<=	0.06	S	S	<=	0.5	S	S	<=	0.5	S	neg	=	0.06	S	=	0.06	S	<=	1	S	<=	2	S	neg	FOLP_180-ins
20161055	66	>65	SAMN05223025	71	65633	159896	2078013	15A	neg	63	24	27	181	=	0.12	R	S	=	0.12	S	<=	0.06	S	<=	0.06	S	S	<=	0.5	S	S	<=	0.5	S	ERMB	>	32	R	>	2	R	<=	1	S	<=	2	S	pos	neg
20161056	57	19to64	SAMN05223026	42	216395	335786	1977921	3	neg	180	2	0	2	<=	0.03	S	S	<=	0.03	S	<=	0.06	S	<=	0.06	S	S	<=	0.5	S	S	<=	0.5	S	neg	=	0.06	S	=	0.06	S	<=	1	S	<=	2	S	neg	neg
20161057	62	19to64	SAMN05223027	45	157072	254557	2101941	23B	neg	1373	0	1	1	=	0.25	R	S	=	0.06	S	<=	0.06	S	=	0.12	S	S	<=	0.5	S	S	<=	0.5	S	neg	=	0.06	S	=	0.06	S	<=	1	S	<=	2	S	neg	FOLP_180-ins
20161058	77	>65	SAMN05223028	41	110774	228671	2068552	16F	neg	10148	0	10	14	=	0.06	S	S	<=	0.03	S	<=	0.06	S	=	0.12	S	S	<=	0.5	S	S	<=	0.5	S	RPLD1-G9R	=	0.06	S	=	0.06	S	<=	1	S	<=	2	S	neg	neg
20161059	51	19to64	SAMN05223029	43	96649	285156	2008865	4	neg	insufficient quality	1	0	0	<=	0.03	S	S	<=	0.03	S	<=	0.06	S	<=	0.06	S	S	<=	0.5	S	S	<=	0.5	S	neg	=	0.06	S	=	0.06	S	<=	1	S	<=	2	S	neg	FOLP_178-ins
20161060	43	19to64	SAMN05223030	49	168183	264764	1976615	3	neg	180	2	0	2	<=	0.03	S	S	<=	0.03	S	<=	0.06	S	<=	0.06	S	S	<=	0.5	S	S	<=	0.5	S	neg	=	0.06	S	=	0.06	S	<=	1	S	<=	2	S	neg	neg
20161061	21	19to64	SAMN05223031	92	50240	152759	2095581	20	neg	235	1	4	2	<=	0.03	S	S	<=	0.03	S	<=	0.06	S	<=	0.06	S	S	<=	0.5	S	S	<=	0.5	S	neg	=	0.06	S	=	0.06	S	<=	1	S	<=	2	S	neg	neg
20161062	53	19to64	SAMN05223032	50	89754	293317	2038201	23A	neg	338	0	1	1	=	0.25	R	S	=	0.06	S	<=	0.06	S	=	0.12	S	S	<=	0.5	S	S	<=	0.5	S	neg	=	0.06	S	=	0.06	S	<=	1	S	<=	2	S	neg	neg
20161063	70	>65	SAMN05223033	52	80461	203773	2012410	4	neg	10172	1	0	0	<=	0.03	S	S	<=	0.03	S	<=	0.06	S	<=	0.06	S	S	<=	0.5	S	S	<=	0.5	S	neg	=	0.06	S	=	0.06	S	<=	1	S	<=	2	S	neg	FOLP_178-ins
20161064	58	19to64	SAMN05223034	193	24688	68571	2185503	7C	neg	11596	2	4	6	<=	0.03	S	S	<=	0.03	S	<=	0.06	S	<=	0.06	S	S	<=	0.5	S	S	<=	0.5	S	neg	=	0.06	S	=	0.06	S	<=	1	S	<=	2	S	neg	neg
20161138	0	0-4	SAMN05223036	52	92338	349229	2087901	33F	neg	100	2	0	6	<=	0.03	S	S	<=	0.03	S	<=	0.06	S	<=	0.06	S	S	<=	0.5	S	S	<=	0.5	S	MEF	=	8	R	=	0.06	S	<=	1	S	<=	2	S	neg	FOLP_189-ins
20161139	47	19to64	SAMN05223037	162	27997	109095	2101266	11A	2	62	2	6	0	<=	0.03	S	S	<=	0.03	S	<=	0.06	S	<=	0.06	S	S	<=	0.5	S	S	<=	0.5	S	MEF	=	8	R	=	0.06	S	<=	1	S	<=	2	S	neg	neg
20161140	60	19to64	SAMN05223038	94	43555	159022	2071919	23A	neg	338	0	1	1	=	0.25	R	S	=	0.06	S	<=	0.06	S	=	0.12	S	S	<=	0.5	S	S	<=	0.5	S	neg	=	0.06	S	=	0.06	S	<=	1	S	<=	2	S	neg	FOLA-I20L
20161141	52	19to64	SAMN05223039	53	96253	225510	2072695	10A	neg	585	0	0	2	<=	0.03	S	S	<=	0.03	S	<=	0.06	S	<=	0.06	S	S	<=	0.5	S	S	<=	0.5	S	neg	=	0.06	S	=	0.06	S	<=	1	S	<=	2	S	neg	neg
20161142	58	19to64	SAMN05223040	75	67117	166763	2017082	31	neg	568	12	0	0	<=	0.03	S	S	<=	0.03	S	<=	0.06	S	<=	0.06	S	S	<=	0.5	S	S	<=	0.5	S	neg	=	0.06	S	=	0.06	S	<=	1	S	<=	2	S	neg	neg
20161143	44	19to64	SAMN05223041	83	57725	175107	2057751	22F	neg	7314	1	2	2	<=	0.03	S	S	<=	0.03	S	<=	0.06	S	<=	0.06	S	S	<=	0.5	S	S	<=	0.5	S	MEF	=	8	R	=	0.06	S	<=	1	S	<=	2	S	neg	neg
20161144	66	>65	SAMN05223042	53	123397	311289	2055047	22F	neg	10163	1	2	2	<=	0.03	S	S	<=	0.03	S	<=	0.06	S	<=	0.06	S	S	<=	0.5	S	S	<=	0.5	S	MEF	=	8	R	=	0.06	S	<=	1	S	<=	2	S	neg	neg
20161145	33	19to64	SAMN05223043	24	186541	377568	2062463	33F	neg	2705	2	0	6	<=	0.03	S	S	<=	0.03	S	<=	0.06	S	<=	0.06	S	S	<=	0.5	S	S	<=	0.5	S	MEF	=	8	R	=	0.06	S	<=	1	S	<=	2	S	neg	FOLP_189-ins
20161146	31	19to64	SAMN05223044	89	46528	248484	2067605	11A	2	62	2	6	0	<=	0.03	S	S	<=	0.03	S	<=	0.06	S	<=	0.06	S	S	<=	0.5	S	S	<=	0.5	S	MEF	=	8	R	=	0.06	S	<=	1	S	<=	2	S	neg	neg
20161147	36	19to64	SAMN05223045	54	109460	298313	2055939	22F	neg	7314	1	2	2	<=	0.03	S	S	<=	0.03	S	<=	0.06	S	<=	0.06	S	S	<=	0.5	S	S	<=	0.5	S	MEF	=	8	R	=	0.06	S	<=	1	S	<=	2	S	neg	neg
20161148	65	>65	SAMN05223046	86	62071	158812	2008569	7F	2	9102	2	0	2	<=	0.03	S	S	<=	0.03	S	<=	0.06	S	<=	0.06	S	S	<=	0.5	S	S	<=	0.5	S	neg	=	0.06	S	=	0.06	S	<=	1	S	<=	2	S	neg	neg
20161149	56	19to64	SAMN05223047	52	95523	249804	2075889	15A	neg	63	24	27	131	=	0.5	R	S	=	0.25	S	=	0.12	S	=	0.5	S	S	=	1	I	S	>	2	R	ERMB	>	32	R	>	2	R	<=	1	S	<=	2	S	pos	neg
20161150	64	19to64	SAMN05223048	97	81019	316879	2111451	20	neg	5190	1	118	23	<=	0.03	S	S	<=	0.03	S	<=	0.06	S	<=	0.06	S	S	<=	0.5	S	S	<=	0.5	S	neg	=	0.06	S	=	0.06	S	<=	1	S	<=	2	S	neg	neg
20161151	87	>65	SAMN05223049	83	67909	195119	2160466	15A	neg	9939	24	27	28	=	0.25	R	S	<=	0.03	S	<=	0.06	S	=	0.12	S	S	<=	0.5	S	S	<=	0.5	S	ERMB	>	32	R	>	2	R	<=	1	S	<=	2	S	pos	FOLP_178-ins
20161152	27	19to64	SAMN05223050	54	78327	296673	2054882	22F	neg	7314	1	2	2	<=	0.03	S	S	<=	0.03	S	<=	0.06	S	<=	0.06	S	S	<=	0.5	S	S	<=	0.5	S	MEF	=	8	R	=	0.06	S	<=	1	S	<=	2	S	neg	neg
20161153	63	19to64	SAMN05223051	59	113837	281221	2077159	35F	neg	498	0	0	191	<=	0.03	S	S	<=	0.03	S	<=	0.06	S	<=	0.06	S	S	<=	0.5	S	S	<=	0.5	S	neg	=	0.06	S	=	0.06	S	<=	1	S	<=	2	S	neg	neg
20161154	61	19to64	SAMN05223052	63	115348	232474	2164149	19F	1	878	17	15	8	=	2	R	S	=	0.5	S	=	0.25	S	=	0.5	S	S	<=	0.5	S	S	>	2	R	MEF	=	8	R	=	0.06	S	<=	1	S	<=	2	S	neg	FOLA-Q1H,D2N,V3I,E14D,I20L:FOLP_180-ins
20161155	77	>65	SAMN05223053	62	100001	323347	2064871	16F	neg	659	9	0	3	<=	0.03	S	S	<=	0.03	S	<=	0.06	S	<=	0.06	S	S	<=	0.5	S	S	<=	0.5	S	neg	=	0.06	S	=	0.06	S	<=	1	S	<=	2	S	neg	neg
20161156	27	19to64	SAMN05223054	68	66237	265380	2181105	23B	neg	1373	0	1	1	=	0.25	R	S	=	0.06	S	<=	0.06	S	=	0.12	S	S	<=	0.5	S	S	<=	0.5	S	neg	=	0.06	S	=	0.06	S	<=	1	S	<=	2	S	neg	FOLP_180-ins
20161157	25	19to64	SAMN05223055	26	165014	561825	2055330	33F	neg	100	2	0	6	<=	0.03	S	S	<=	0.03	S	<=	0.06	S	<=	0.06	S	S	<=	0.5	S	S	<=	0.5	S	MEF	=	8	R	=	0.06	S	<=	1	S	<=	2	S	neg	FOLP_189-ins
20161158	65	>65	SAMN05223056	81	62862	153553	2144526	38	neg	393	2	4	4	<=	0.03	S	S	<=	0.03	S	<=	0.06	S	<=	0.06	S	S	<=	0.5	S	S	<=	0.5	S	neg	=	0.06	S	=	0.06	S	<=	1	S	<=	2	S	neg	neg
20161159	97	>65	SAMN05223057	67	79904	279251	2085289	9N	neg	4666	23	0	0	<=	0.03	S	S	<=	0.03	S	<=	0.06	S	<=	0.06	S	S	<=	0.5	S	S	<=	0.5	S	neg	=	0.06	S	=	0.06	S	<=	1	S	<=	2	S	neg	neg
20161160	81	>65	SAMN05223058	69	129298	236020	2121186	21	neg	432	0	0	2	<=	0.03	S	S	<=	0.03	S	<=	0.06	S	<=	0.06	S	S	<=	0.5	S	S	<=	0.5	S	neg	=	0.06	S	=	0.06	S	<=	1	S	<=	2	S	neg	neg
20161161	58	19to64	SAMN05223059	260	28496	168860	2041929	12F	neg	11249	0	0	2	<=	0.03	S	S	<=	0.03	S	<=	0.06	S	<=	0.06	S	S	<=	0.5	S	S	<=	0.5	S	neg	=	0.06	S	=	0.06	S	<=	1	S	<=	2	S	neg	neg
20161162	47	19to64	SAMN05223060	83	56166	136440	2053390	12F	neg	218	0	0	0	<=	0.03	S	S	<=	0.03	S	<=	0.06	S	<=	0.06	S	S	<=	0.5	S	S	<=	0.5	S	MEF	=	8	R	=	0.06	S	<=	1	S	<=	2	S	neg	neg
20161163	24	19to64	SAMN05223061	73	65574	202674	2108288	23A	neg	338	97	1	1	=	0.25	R	S	=	0.06	S	<=	0.06	S	=	0.12	S	S	<=	0.5	S	S	<=	0.5	S	neg	=	0.06	S	=	0.06	S	<=	1	S	<=	2	S	neg	neg
20161164	2	0-4	SAMN05223062	479	18055	93108	2085633	22F	neg	433	1	2	2	<=	0.03	S	S	<=	0.03	S	<=	0.06	S	<=	0.06	S	S	<=	0.5	S	S	<=	0.5	S	neg	=	0.06	S	=	0.06	S	<=	1	S	<=	2	S	neg	neg
20161165	53	19to64	SAMN05223063	51	122688	280740	1997503	9N	neg	405	23	0	0	<=	0.03	S	S	<=	0.03	S	<=	0.06	S	<=	0.06	S	S	<=	0.5	S	S	<=	0.5	S	neg	=	0.06	S	=	0.06	S	<=	1	S	<=	2	S	neg	neg
20161166	61	19to64	SAMN05223064	53	100315	249448	2107762	15C	neg	13504	0	1	2	=	0.06	S	S	=	0.06	S	<=	0.06	S	<=	0.06	S	S	<=	0.5	S	S	<=	0.5	S	neg	=	0.06	S	=	0.06	S	<=	1	S	<=	2	S	neg	neg
20161167	95	>65	SAMN05223065	76	69349	149526	2149478	22F	neg	433	1	2	2	<=	0.03	S	S	<=	0.03	S	<=	0.06	S	<=	0.06	S	S	<=	0.5	S	S	<=	0.5	S	neg	=	0.06	S	=	0.06	S	<=	1	S	<=	2	S	neg	neg
20161168	73	>65	SAMN05223066	51	188092	277371	1977071	3	neg	180	2	0	2	<=	0.03	S	S	<=	0.03	S	<=	0.06	S	<=	0.06	S	S	<=	0.5	S	S	<=	0.5	S	neg	=	0.06	S	=	0.06	S	<=	1	S	<=	2	S	neg	neg
20161169	74	>65	SAMN05223067	152	23633	65364	2032760	31	neg	10486	12	0	0	<=	0.03	S	S	<=	0.03	S	<=	0.06	S	<=	0.06	S	S	<=	0.5	S	S	<=	0.5	S	neg	=	0.06	S	=	0.06	S	<=	1	S	<=	2	S	neg	FOLP_178-ins
20161170	40	19to64	SAMN05223068	78	61965	133292	2023647	31	neg	10486	12	0	0	<=	0.03	S	S	<=	0.03	S	<=	0.06	S	<=	0.06	S	S	<=	0.5	S	S	<=	0.5	S	neg	=	0.06	S	=	0.06	S	<=	1	S	<=	2	S	neg	FOLP_178-ins
20161171	36	19to64	SAMN05223069	88	60806	185970	2069376	19F	2	654	11	0	0	<=	0.03	S	S	<=	0.03	S	<=	0.06	S	<=	0.06	S	S	<=	0.5	S	S	<=	0.5	S	neg	=	0.06	S	=	0.06	S	<=	1	S	<=	2	S	neg	neg
20161172	0	0-4	SAMN05223070	95	54232	131287	2113414	19F	2	654	2	0	0	<=	0.03	S	S	<=	0.03	S	<=	0.06	S	<=	0.06	S	S	<=	0.5	S	S	<=	0.5	S	neg	=	0.06	S	=	0.06	S	<=	1	S	<=	2	S	neg	neg
20161173	71	>65	SAMN05223071	50	113922	273786	2119213	35F	neg	1635	0	0	3	<=	0.03	S	S	<=	0.03	S	<=	0.06	S	<=	0.06	S	S	<=	0.5	S	S	<=	0.5	S	neg	=	0.06	S	=	0.06	S	<=	1	S	<=	2	S	neg	neg
20161174	57	19to64	SAMN05223072	92	78779	371305	2032709	12F	neg	218	0	0	0	<=	0.03	S	S	<=	0.03	S	<=	0.06	S	<=	0.06	S	S	<=	0.5	S	S	<=	0.5	S	MEF	=	8	R	=	0.06	S	<=	1	S	<=	2	S	neg	neg
20161175	60	19to64	SAMN05223073	54	98935	222991	2036380	22F	neg	433	1	2	2	<=	0.03	S	S	<=	0.03	S	<=	0.06	S	<=	0.06	S	S	<=	0.5	S	S	<=	0.5	S	neg	=	0.06	S	=	0.06	S	<=	1	S	<=	2	S	neg	neg
20161176	81	>65	SAMN05223074	103	47155	186044	2076559	19F	2	654	2	0	0	<=	0.03	S	S	<=	0.03	S	<=	0.06	S	<=	0.06	S	S	<=	0.5	S	S	<=	0.5	S	neg	=	0.06	S	=	0.06	S	<=	1	S	<=	2	S	neg	neg
20161177	61	19to64	SAMN05223075	70	64079	163409	2069599	22F	neg	433	1	2	2	<=	0.03	S	S	<=	0.03	S	<=	0.06	S	<=	0.06	S	S	<=	0.5	S	S	<=	0.5	S	neg	=	0.06	S	=	0.06	S	<=	1	S	<=	2	S	neg	neg
20161178	56	19to64	SAMN05223076	71	86487	152897	2096030	20	neg	1257	1	4	2	<=	0.03	S	S	<=	0.03	S	<=	0.06	S	<=	0.06	S	S	<=	0.5	S	S	<=	0.5	S	neg	=	0.06	S	=	0.06	S	<=	1	S	<=	2	S	neg	neg
20161179	55	19to64	SAMN05223077	32	144342	307907	2048874	33F	neg	100	2	0	6	<=	0.03	S	S	<=	0.03	S	<=	0.06	S	<=	0.06	S	S	<=	0.5	S	S	<=	0.5	S	MEF	=	8	R	=	0.06	S	<=	1	S	<=	2	S	neg	FOLP_189-ins
20161180	1	0-4	SAMN05223078	351	11982	83156	2153475	15C	1	162	1	0	NF	<=	0.03	S	S	<=	0.03	S	<=	0.06	S	<=	0.06	S	S	<=	0.5	S	S	<=	0.5	S	neg	=	0.06	S	=	0.06	S	<=	1	S	<=	2	S	neg	neg
20161181	67	>65	SAMN05223079	51	114708	274238	1996562	22F	neg	698	0	2	0	<=	0.03	S	S	<=	0.03	S	<=	0.06	S	<=	0.06	S	S	<=	0.5	S	S	<=	0.5	S	neg	=	0.06	S	=	0.06	S	<=	1	S	<=	2	S	neg	neg
20161182	70	>65	SAMN05223080	47	109366	194429	2081241	9N	neg	10454	1	0	0	<=	0.03	S	S	<=	0.03	S	<=	0.06	S	<=	0.06	S	S	<=	0.5	S	S	<=	0.5	S	neg	=	0.06	S	=	0.06	S	<=	1	S	<=	2	S	neg	neg
20161183	72	>65	SAMN05223081	31	147980	253567	2068609	33F	neg	2705	2	0	6	<=	0.03	S	S	<=	0.03	S	<=	0.06	S	<=	0.06	S	S	<=	0.5	S	S	<=	0.5	S	MEF	=	8	R	=	0.06	S	<=	1	S	<=	2	S	neg	FOLP_189-ins
20161184	49	19to64	SAMN05223082	47	116719	199794	2063992	20	neg	235	1	4	2	<=	0.03	S	S	<=	0.03	S	<=	0.06	S	<=	0.06	S	S	<=	0.5	S	S	<=	0.5	S	neg	=	0.06	S	=	0.06	S	<=	1	S	<=	2	S	neg	neg
20161185	77	>65	SAMN05223083	34	195857	431194	1989964	3	neg	11593	2	3	2	<=	0.03	S	S	<=	0.03	S	<=	0.06	S	<=	0.06	S	S	<=	0.5	S	S	<=	0.5	S	neg	=	0.06	S	=	0.06	S	<=	1	S	<=	2	S	neg	neg
20161186	82	>65	SAMN05223084	52	119677	391109	2087426	9N	neg	632	1	0	0	<=	0.03	S	S	<=	0.03	S	<=	0.06	S	<=	0.06	S	S	<=	0.5	S	S	<=	0.5	S	neg	=	0.06	S	=	0.06	S	<=	1	S	<=	2	S	neg	neg
20161187	47	19to64	SAMN05223085	112	62482	116610	2196691	19A	1	695	8	0	11	=	0.12	R	S	=	0.06	S	<=	0.06	S	<=	0.06	S	S	<=	0.5	S	S	<=	0.5	S	neg	=	0.06	S	=	0.06	S	<=	1	S	<=	2	S	neg	neg
20161188	76	>65	SAMN05223086	66	79491	210597	2094095	15A	1	3811	1	0	0	<=	0.03	S	S	<=	0.03	S	<=	0.06	S	<=	0.06	S	S	<=	0.5	S	S	<=	0.5	S	neg	=	0.06	S	=	0.06	S	<=	1	S	<=	2	S	neg	neg
20161189	89	>65	SAMN05223087	77	81650	266513	2064810	35F	neg	498	0	0	3	<=	0.03	S	S	<=	0.03	S	<=	0.06	S	<=	0.06	S	S	<=	0.5	S	S	<=	0.5	S	neg	=	0.06	S	=	0.06	S	<=	1	S	<=	2	S	neg	neg
20161190	62	19to64	SAMN05223088	62	77775	188564	2070019	22F	neg	433	1	2	2	<=	0.03	S	S	<=	0.03	S	<=	0.06	S	<=	0.06	S	S	<=	0.5	S	S	<=	0.5	S	neg	=	0.06	S	=	0.06	S	<=	1	S	<=	2	S	neg	neg
20161191	5	5to18	SAMN05223089	31	156265	447560	2042422	9N	neg	66	1	0	0	<=	0.03	S	S	<=	0.03	S	<=	0.06	S	<=	0.06	S	S	<=	0.5	S	S	<=	0.5	S	neg	=	0.06	S	=	0.06	S	<=	1	S	<=	2	S	neg	neg
20161192	48	19to64	SAMN05223090	62	121974	259704	2156258	19F	neg	861	24	27	192	=	0.12	R	S	=	0.25	S	<=	0.06	S	=	0.12	S	S	<=	0.5	S	S	<=	0.5	S	ERMB	>	32	R	>	2	R	<=	1	S	<=	2	S	pos	neg
20161193	74	>65	SAMN05223091	23	213879	345582	1988546	3	neg	180	2	3	2	<=	0.03	S	S	<=	0.03	S	<=	0.06	S	<=	0.06	S	S	<=	0.5	S	S	<=	0.5	S	neg	=	0.06	S	=	0.06	S	<=	1	S	<=	2	S	neg	neg
20161194	63	19to64	SAMN05223092	52	92594	336997	2129147	6C	neg	12874	1	4	21	=	0.06	S	S	<=	0.03	S	<=	0.06	S	<=	0.06	S	S	<=	0.5	S	S	<=	0.5	S	neg	=	0.06	S	=	0.06	S	<=	1	S	<=	2	S	neg	neg
20161195	99	>65	SAMN05223093	62	66331	149424	2133296	35B	1	156	4	12	7	=	2	R	S	=	4	I	=	0.5	I	=	1	I	S	=	1	I	S	>	2	R	MEF	=	8	R	=	0.06	S	<=	1	S	<=	2	S	neg	FOLA-I20L:FOLP_178-ins
20161243	91	>65	SAMN09224615	79	54469	160440	2020696	31	neg	568	12	0	0	<=	0.03	S	S	<=	0.03	S	<=	0.06	S	<=	0.06	S	S	<=	0.5	S	S	<=	0.5	S	neg	=	0.06	S	=	0.06	S	<=	1	S	<=	2	S	neg	neg
20161244	1	0-4	SAMN09224747	83	75405	156119	2101500	10A	neg	11803	1	6	0	<=	0.03	S	S	<=	0.03	S	<=	0.06	S	<=	0.06	S	S	<=	0.5	S	S	<=	0.5	S	neg	=	0.06	S	=	0.06	S	<=	1	S	<=	2	S	neg	neg
20161245	77	>65	SAMN09231001	46	111660	222229	2078132	16F	neg	10148	0	10	14	=	0.06	S	S	<=	0.03	S	<=	0.06	S	=	0.12	S	S	<=	0.5	S	S	<=	0.5	S	neg	=	0.06	S	=	0.06	S	<=	1	S	<=	2	S	neg	neg
20161246	64	19to64	SAMN09224432	74	59655	216609	2060220	22F	neg	11804	1	2	2	<=	0.03	S	S	<=	0.03	S	<=	0.06	S	<=	0.06	S	S	<=	0.5	S	S	<=	0.5	S	MEF	=	8	R	=	0.06	S	<=	1	S	<=	2	S	neg	neg
20161247	80	>65	SAMN09231491	58	67294	169655	2072885	22F	neg	433	1	2	2	<=	0.03	S	S	<=	0.03	S	<=	0.06	S	<=	0.06	S	S	<=	0.5	S	S	<=	0.5	S	neg	=	0.06	S	=	0.06	S	<=	1	S	<=	2	S	neg	neg
20161248	71	>65	SAMN09224411	73	58803	127459	2010279	11A	2	11805	2	6	0	<=	0.03	S	S	<=	0.03	S	<=	0.06	S	<=	0.06	S	S	<=	0.5	S	S	<=	0.5	S	neg	=	0.06	S	=	0.06	S	<=	1	S	<=	2	S	neg	neg
20161249	84	>65	SAMN09224273	69	80954	187181	2082254	6C	neg	639	2	0	0	<=	0.03	S	S	<=	0.03	S	<=	0.06	S	<=	0.06	S	S	<=	0.5	S	S	<=	0.5	S	MEF	=	8	R	=	0.06	S	<=	1	S	<=	2	S	neg	neg
20161250	73	>65	SAMN05596832	55	82604	137699	2021455	35B	1	558	4	7	7	=	2	R	S	=	4	I	=	0.5	I	=	1	I	S	=	1	I	S	>	2	R	MEF	=	8	R	=	0.06	S	<=	1	S	<=	2	S	neg	neg
[truncated: 3,213 more rows]
[truncated: 24 more columns]
