# Supplementary material for: A Population-Based Descriptive Atlas of Invasive Pneumococcal Strains Recovered Within the U.S. During 2015–2016
Source: PubMed Central journal article supplement (PMC6262371; doi:10.3389/fmicb.2018.02670), 2018-11-19
Supplement: Table_2.pdf [file Table_2.pdf]

supplementary Table 2. Clonal complex/serotype combinations of serotype-switch variants within 2015-2016 ABCs that have been documented from isolates recovered during 2002 or later.

| CC <sup>A</sup> | putative replaced serotype | Progeny serotype | No. progeny isolates | Predominant or representative <sup>A</sup> |           | pen,ery,cli phenotypes (no. isolates) | PCV escape | PCV13 serotype progeny | category |
|-----------------|----------------------------|------------------|----------------------|--------------------------------------------|-----------|---------------------------------------|------------|------------------------|----------|
|                 |                            |                  |                      | MLST                                       | PBP type  |                                       |            |                        |          |
| 338             | 23A                        | 23B              | 101                  | 1373                                       | 0-1-1     | penI (101)                            | no         | no                     | 1        |
|                 |                            | 19F              | 1                    | 338                                        | 0-1-1     | penI, eryR (1)                        | no         | yes                    | 2        |
|                 |                            | 35B              | 1                    | 13255                                      | 0-1-1     | penI (1)                              | no         | no                     | 3        |
|                 |                            | 15C              | 1                    | 13504                                      | 0-1-2     | susceptible (1)                       | no         | no                     | 4        |
|                 |                            | 15A              | 1                    | 338                                        | 36-1-69   | penI (1)                              | no         | no                     | 5        |
|                 |                            | 19A              | 2                    | 8197                                       | 17-1-22   | penI (2)                              | no         | yes                    | 6        |
|                 |                            | 6C               | 3                    | 5241                                       | 0-86-80   | penI (3)                              | no         | yes                    | 7        |
| 156             | 9V,19A,19F                 | 15A              | 40                   | 3811                                       | 1-0-0     | susceptible (39); penI,eryR (1)       | yes        | no                     | 8        |
|                 |                            | 15BC             | 22                   | 162                                        | 1-0-0     | susceptible (21); eryR (1)            | yes        | no                     | 9        |
|                 |                            | 23B              | 2                    | 162                                        | 0-0-0     | susceptible (2)                       | yes        | no                     | 10       |
|                 |                            | 11A              | 4                    | 166                                        | 15-12-18  | penR, eryR, cliR (3), penI (1)        | yes        | no                     | 11       |
|                 |                            | 31               | 1                    | 156                                        | 15-12-18  | penR, eryR (1)                        | yes        | no                     | 12       |
|                 |                            | 13               | 1                    | 156                                        | 15-12-173 | penI (1)                              | yes        | no                     | 13       |
|                 |                            | 35B              | 27                   | 156                                        | 4-12-7    | penR, eryR (26); susceptible (1)      | yes        | no                     | 14       |
| 3280            | 23F                        | 15BC             | 59                   | 3280                                       | 7-8-9     | penI,eryR (58); penI,eryR,cliR (1)    | yes        | no                     | 15       |
| 244             | 4                          | 19A              | 48                   | 695                                        | 8-0-11    | penI (34); penI, eryR (14)            | no         | yes                    | 16       |
|                 |                            | 19F              | 1                    | 899                                        | 0-0-3     | susceptible (1)                       | no         | yes                    | 17       |
| 439             | 23A                        | 4                | 28                   | 10172                                      | 1-0-0     | susceptible (28)                      | no         | yes                    | 18       |
| 100             | 33F                        | 3                | 8                    | 10457                                      | 2-0-6     | susceptible (6); eryR (2)             | no         | yes                    | 19       |
|                 |                            | 6C               | 1                    | 10471                                      | 2-0-6     | penI (1)                              | no         | yes                    | 20       |
|                 |                            | 23A              | 1                    | 10492                                      | 0-0-1     | penI, eryR (1)                        | no         | no                     | 21       |
| 177             | 19F                        | 15C              | 1                    | 177                                        | 23-0-139  | susceptible (1)                       | yes        | no                     | 22       |
|                 |                            | 17F              | 1                    | 177                                        | 23-0-0    | susceptible (1)                       | yes        | no                     | 23       |
|                 |                            | 7C               | 4                    | 177                                        | 2-0-3     | susceptible (4)                       | yes        | no                     | 24       |
|                 |                            | 24F              | 1                    | 177                                        | 1-0-0     | susceptible (1)                       | yes        | no                     | 25       |
|                 |                            | 63               | 15A                  | 19F                                        | 1         | 861                                   | 24-27-192  | penI, eryR, cliR (1)   | no       |
|                 |                            | 8                | 1                    | 63                                         | 24-27-28  | penI, eryR, cliR (1)                  | no         | no                     | 27       |
|                 |                            | 9N               | 1                    | 2543                                       | 1-27-2    | eryR, cliR (1)                        | no         | no                     | 28       |
|                 |                            | 17F              | 1                    | 63                                         | 0-27-3    | penI, eryR, cliR (1)                  | no         | yes                    | 29       |
|                 |                            | 15BC             | 2                    | 12024                                      | 24-62-11  | penI, eryR, cliR (2)                  | no         | no                     | 30       |
|                 |                            | 35B              | 1                    | 11818                                      | 13-31-114 | penI, eryR, cliR (1)                  | no         | no                     | 31       |
|                 |                            | 23B              | 2                    | 12863                                      | 7-31-8    | penI, eryR, cliR (2)                  | no         | no                     | 32       |
| 433             | 22F                        | 23B              | 5                    | 433                                        | 1-2-0     | susceptible (5)                       | no         | no                     | 33       |
|                 |                            | 31               | 1                    | 433                                        | 1-2-0     | susceptible (1)                       | no         | no                     | 34       |
|                 |                            | 11A              | 1                    | 433                                        | 1-2-2     | susceptible (1)                       | no         | no                     | 35       |
| 193             | 21                         | 15B              | 3                    | 10227                                      | 0-0-0     | eryR (3)                              | no         | no                     | 36       |
|                 |                            | 23A              | 1                    | 3689                                       | 0-0-1     | penI (1)                              | no         | no                     | 37       |
| 376             | 6A, 6C                     | 19A              | 3                    | 2268                                       | 27-36-8   | penR, eryR (3)                        | no         | yes                    | 38       |
| 81              | 19F, 23F                   | 6A               | 1                    | 282                                        | 15-12-18  | penR, eryR (1)                        | no         | yes                    | 39       |
|                 |                            | 15A              | 1                    | 11576                                      | 15-12-18  | penR, eryR (1)                        | yes        | no                     | 40       |
|                 |                            | 15C              | 1                    | 83                                         | 15-12-18  | penR, eryR (1)                        | yes        | no                     | 41       |
| 473             | 6C                         | 10A              | 1                    | 473                                        | 0-34-2    | eryR (1)                              | yes        | no                     | 42       |
|                 |                            | 23B              | 1                    | 1876                                       | 2-34-44   | penI, eryR (1)                        | yes        | no                     | 43       |
| 320             | 19F                        | 3                | 2                    | 271                                        | 17-16-47  | penR, eryR, cliR (2)                  | no         | yes                    | 44       |
| 1092            | 6C                         | 34               | 1                    | 1092                                       | 6-101-8   | penI (1)                              | yes        | no                     | 45       |
|                 |                            | 35B              | 1                    | 1092                                       | 6-7-36    | penI (1)                              | yes        | no                     | 46       |
| 230             | 19A                        | 20               | 2                    | 276                                        | 17-15-18  | penR, eryR, cliR (2)                  | yes        | no                     | 47       |
| 62              | 11A                        | 3                | 1                    | 62                                         | 2-6-0     | susceptible (1)                       | no         | yes                    | 48       |
| 242             | 23F                        | 6A               | 1                    | 242                                        | 13-31-146 | penR, eryR, cliR (1)                  | no         | yes                    | 49       |
| 392             | 17F                        | 34               | 1                    | 392                                        | 11-0-0    | susceptible (1)                       | no         | no                     | 50       |
| 395             | 6C                         | 10A              | 1                    | 11803                                      | 1-6-0     | susceptible (1)                       | yes        | no                     | 51       |
| 432             | 21                         | 19A              | 1                    | 432                                        | 0-0-2     | susceptible (1)                       | no         | yes                    | 52       |
| 504             | 23F                        | 8                | 1                    | 504                                        | 3-2-5     | susceptible (1)                       | yes        | no                     | 53       |
| 558             | 35B                        | 6B               | 1                    | 558                                        | 4-7-7     | penR (1)                              | no         | yes                    | 54       |
| 568             | 31                         | 23B              | 1                    | 568                                        | 0-0-0     | eryR (1)                              | no         | no                     | 55       |
| 1201            | 19A                        | 7C               | 1                    | 10460                                      | 2-4-3     | susceptible (1)                       | no         | yes                    | 56       |
| 1292            | 6C                         | 16F              | 1                    | 10464                                      | 19-31-8   | penI, eryR (1)                        | yes        | no                     | 57       |

<sup>A</sup> CCs (clonal complexes) are listed in order of decreasing number of progeny isolates. The MLST/PBP type combinations within each CC are listed such that existing PBP relationships are optimally aligned.
